# Supplementary material for: Researcher Conduct Determines Data Reliability
Source: Preprints.org preprint supplement (doi:10.20944/preprints201804.0068.v1), 2018-04-05
Supplement: Supplementary file 3 [file supplementary]

## Sheet: Suppl Table 1 Overview
Suppl. Table 1. Articles identified by the initial literature search.
Sheets contain
1) Articles identified by a PubMed (www.ncbi.nlm.nih.gov/pubmed) search using the term "replication crisis" (3rd November 2017)
2) Articles identified by a PubMed search using the term "reproducibility crisis" (3rd November 2017)
3) Articles identified by a PubMed search using the term "cell line authentication" (17th November 2017)
4) Additional articles that were identified from the reference lists of other articles
5) All identified articles after the removal of overlaps
6) All relevant articles
7) Article types of relevant articles
8) Core features of relevant articles
9) Core features of articles that contain original data
10) Article types of articles that present original data

## Sheet: 1) Replication crisis
"Replication crisis"		3rd November 2017
Title	URL	Description	Details	ShortDetails	Resource	Type	Identifiers	Db	EntrezUID	Properties				Comment		Relevant	Research on topic	Attitude
Relationship between viremia and specific organ damage in Ebola patients: a cohort study.	/pubmed/29020340	Lanini S, Portella G, Vairo F, Kobinger GP, Pesenti A, Langer M, Kabia S, Brogiato G, Amone J, Castilletti C, Miccio R, Capobianchi MR, Strada G, Zumla A, Di Caro A, Ippolito G; INMI-EMERGENCY EBOV Sierra Leone Study group..	Clin Infect Dis. 2017 Aug 20. doi: 10.1093/cid/cix704. [Epub ahead of print]	Clin Infect Dis. 2017	PubMed	citation	PMID:29020340	pubmed	29020340	create date:2017/10/12 | first author:Lanini S				Not relevant
Alternative Lengthening of Telomeres: DNA Repair Pathways Converge.	/pubmed/28969871	Sobinoff AP, Pickett HA.	Trends Genet. 2017 Sep 29. pii: S0168-9525(17)30162-2. doi: 10.1016/j.tig.2017.09.003. [Epub ahead of print] Review.	Trends Genet. 2017	PubMed	citation	PMID:28969871	pubmed	28969871	create date:2017/10/04 | first author:Sobinoff AP				Not relevant
Ethical and Legal Implications of the Methodological Crisis in Neuroimaging.	/pubmed/28937337	Kellmeyer P.	Camb Q Healthc Ethics. 2017 Oct;26(4):530-554. doi: 10.1017/S096318011700007X.	Camb Q Healthc Ethics. 2017	PubMed	citation	PMID:28937337	pubmed	28937337	create date:2017/09/25 | first author:Kellmeyer P				Viewpoint/ methodology		1
Caring about Power Analyses.	/pubmed/28933527	Murray JE, Barrett ST, Brock RL, Bevins RA.	ACS Chem Neurosci. 2017 Sep 21. doi: 10.1021/acschemneuro.7b00341. [Epub ahead of print]	ACS Chem Neurosci. 2017	PubMed	citation	PMID:28933527	pubmed	28933527	create date:2017/09/22 | first author:Murray JE				Viewpoint/ methodology		1
The Failure of Null Hypothesis Significance Testing When Studying Incremental Changes, and What to Do About It.	/pubmed/28914154	Gelman A.	Pers Soc Psychol Bull. 2017 Sep 1:146167217729162. doi: 10.1177/0146167217729162. [Epub ahead of print]	Pers Soc Psychol Bull. 2017	PubMed	citation	PMID:28914154	pubmed	28914154	create date:2017/09/16 | first author:Gelman A				Viewpoint/ methodology		1
Why statistical inference from clinical trials is likely to generate false and irreproducible results.	/pubmed/28830371	Hanin L.	BMC Med Res Methodol. 2017 Aug 22;17(1):127. doi: 10.1186/s12874-017-0399-0.	BMC Med Res Methodol. 2017	PubMed	citation	PMID:28830371 | PMCID:PMC5568363	pubmed	28830371	create date:2017/08/24 | first author:Hanin L				Viewpoint/ methodology		1
When Null Hypothesis Significance Testing Is Unsuitable for Research: A Reassessment.	/pubmed/28824397	Szucs D, Ioannidis JPA.	Front Hum Neurosci. 2017 Aug 3;11:390. doi: 10.3389/fnhum.2017.00390. eCollection 2017. Review.	Front Hum Neurosci. 2017	PubMed	citation	PMID:28824397 | PMCID:PMC5540883	pubmed	28824397	create date:2017/08/22 | first author:Szucs D				Viewpoint/ methodology		1
The reproducibility "crisis": Reaction to replication crisis should not stifle innovation.	/pubmed/28794201	Hunter P.	EMBO Rep. 2017 Sep;18(9):1493-1496. doi: 10.15252/embr.201744876. Epub 2017 Aug 9. No abstract available.	EMBO Rep. 2017	PubMed	citation	PMID:28794201 | PMCID:PMC5579390	pubmed	28794201	create date:2017/08/11 | first author:Hunter P				Viewpoint/ methodology		1
Participant NonnaivetÌ© and the reproducibility of cognitive psychology.	/pubmed/28744765	Zwaan RA, Pecher D, Paolacci G, Bouwmeester S, Verkoeijen P, Dijkstra K, Zeelenberg R.	Psychon Bull Rev. 2017 Jul 25. doi: 10.3758/s13423-017-1348-y. [Epub ahead of print]	Psychon Bull Rev. 2017	PubMed	citation	PMID:28744765	pubmed	28744765	create date:2017/07/27 | first author:Zwaan RA				Confirmation study		1	1		Psychology: Successful reproduction of studies
Going in Many Right Directions, All at Once.	/pubmed/28727963	Fiske ST.	Perspect Psychol Sci. 2017 Jul;12(4):652-655. doi: 10.1177/1745691617706506.	Perspect Psychol Sci. 2017	PubMed	citation	PMID:28727963 | PMCID:PMC5520646	pubmed	28727963	create date:2017/07/21 | first author:Fiske ST				Viewpoint/ methodology		1
Psychology's Replication Crisis and the Grant Culture: Righting the Ship.	/pubmed/28727961	Lilienfeld SO.	Perspect Psychol Sci. 2017 Jul;12(4):660-664. doi: 10.1177/1745691616687745.	Perspect Psychol Sci. 2017	PubMed	citation	PMID:28727961	pubmed	28727961	create date:2017/07/21 | first author:Lilienfeld SO				Viewpoint/ methodology		1
The earth is flat (påÊ>åÊ0.05): significance thresholds and the crisis of unreplicable research.	/pubmed/28698825	Amrhein V, Korner-Nievergelt F, Roth T.	PeerJ. 2017 Jul 7;5:e3544. doi: 10.7717/peerj.3544. eCollection 2017.	PeerJ. 2017	PubMed	citation	PMID:28698825 | PMCID:PMC5502092	pubmed	28698825	create date:2017/07/13 | first author:Amrhein V				Viewpoint/ methodology		1			Statistics: Less strict p-values
Commentary: Reproducibility in Psychological Science: When Do Psychological Phenomena Exist?	/pubmed/28690559	Heino MTJ, Fried EI, LeBel EP.	Front Psychol. 2017 Jun 22;8:1004. doi: 10.3389/fpsyg.2017.01004. eCollection 2017. No abstract available.	Front Psychol. 2017	PubMed	citation	PMID:28690559 | PMCID:PMC5479906	pubmed	28690559	create date:2017/07/12 | first author:Heino MTJ				Viewpoint/ methodology		1
The replacement of assertive outreach services by reinforcing local community teams: a replication study reporting comparative outcomes and patient reported experience.	/pubmed/28648100	Firn M, Alonso-Vicente M, Hubbeling D, Holley J, White SJ, Jones B.	J Ment Health. 2017 Jun 24:1-7. doi: 10.1080/09638237.2017.1340601. [Epub ahead of print]	J Ment Health. 2017	PubMed	citation	PMID:28648100	pubmed	28648100	create date:2017/06/27 | first author:Firn M				Confirmation study		1	1		Public Health: successful
Confidence crisis of results in biomechanics research.	/pubmed/28632059	Knudson D.	Sports Biomech. 2017 Nov;16(4):425-433. doi: 10.1080/14763141.2016.1246603. Epub 2017 Feb 28.	Sports Biomech. 2017	PubMed	citation	PMID:28632059	pubmed	28632059	create date:2017/06/21 | first author:Knudson D				Viewpoint/ methodology		1			Sports biomechanics
ERK1/2 signaling mediated naringin-induced osteogenic differentiation of immortalized human periodontal ligament stem cells.	/pubmed/28554841	Wei K, Xie Y, Chen T, Fu B, Cui S, Wang Y, Cai G, Chen X.	Biochem Biophys Res Commun. 2017 Jul 29;489(3):319-325. doi: 10.1016/j.bbrc.2017.05.130. Epub 2017 May 26.	Biochem Biophys Res Commun. 2017	PubMed	citation	PMID:28554841	pubmed	28554841	create date:2017/05/31 | first author:Wei K				Not relevant
Sexual orientation differences in treatment expectation, alliance, and outcome among patients at risk for suicide in a public psychiatric hospital.	/pubmed/28506219	PlÌ¦derl M, Kunrath S, Cramer RJ, Wang J, Hauer L, Fartacek C.	BMC Psychiatry. 2017 May 15;17(1):184. doi: 10.1186/s12888-017-1337-8.	BMC Psychiatry. 2017	PubMed	citation	PMID:28506219 | PMCID:PMC5433065	pubmed	28506219	create date:2017/05/17 | first author:PlÌ¦derl M				Not relevant
Challenges to Ego-Depletion Research Go beyond the Replication Crisis: A Need for Tackling the Conceptual Crisis.	/pubmed/28458647	Lurquin JH, Miyake A.	Front Psychol. 2017 Apr 18;8:568. doi: 10.3389/fpsyg.2017.00568. eCollection 2017. No abstract available.	Front Psychol. 2017	PubMed	citation	PMID:28458647 | PMCID:PMC5394171	pubmed	28458647	create date:2017/05/02 | first author:Lurquin JH				Viewpoint/ methodology		1
Bayesian data analysis for newcomers.	/pubmed/28405907	Kruschke JK, Liddell TM.	Psychon Bull Rev. 2017 Apr 12. doi: 10.3758/s13423-017-1272-1. [Epub ahead of print]	Psychon Bull Rev. 2017	PubMed	citation	PMID:28405907	pubmed	28405907	create date:2017/04/14 | first author:Kruschke JK				Not relevant
The (non-)replicability of regulatory resource depletion: A field report employing non-invasive brain stimulation.	/pubmed/28362843	Emmerling F, Martijn C, Alberts HJ, Thomson AC, David B, Kessler D, Schuhmann T, Sack AT.	PLoS One. 2017 Mar 31;12(3):e0174331. doi: 10.1371/journal.pone.0174331. eCollection 2017.	PLoS One. 2017	PubMed	citation	PMID:28362843 | PMCID:PMC5376079	pubmed	28362843	create date:2017/04/01 | first author:Emmerling F				Confirmation study		1	1		Psychology: unsuccessful
Allen Newell's Program of Research: The Video-Game Test.	/pubmed/28318146	Gobet F.	Top Cogn Sci. 2017 Apr;9(2):522-532. doi: 10.1111/tops.12265. Epub 2017 Mar 20.	Top Cogn Sci. 2017	PubMed	citation	PMID:28318146	pubmed	28318146	create date:2017/03/21 | first author:Gobet F				Not relevant
Addressing the "Replication Crisis": Using Original Studies to Design Replication Studies with Appropriate Statistical Power.	/pubmed/28266872	Anderson SF, Maxwell SE.	Multivariate Behav Res. 2017 May-Jun;52(3):305-324. doi: 10.1080/00273171.2017.1289361. Epub 2017 Mar 7.	Multivariate Behav Res. 2017	PubMed	citation	PMID:28266872	pubmed	28266872	create date:2017/03/08 | first author:Anderson SF				Methodological study		1	1		Psychology
Female fecundity variation affects reproducibility of experiments on host plant preference and acceptance in a phytophagous insect.	/pubmed/28202813	SchÌ_pers A, PetrÌ©n H, Wheat CW, Wiklund C, Friberg M.	Proc Biol Sci. 2017 Feb 22;284(1849). pii: 20162643. doi: 10.1098/rspb.2016.2643.	Proc Biol Sci. 2017	PubMed	citation	PMID:28202813 | PMCID:PMC5326532	pubmed	28202813	create date:2017/02/17 | first author:SchÌ_pers A				Not relevant
The probability of probability and research truths.	/pubmed/28201852	Fatovich DM, Phillips M.	Emerg Med Australas. 2017 Apr;29(2):242-244. doi: 10.1111/1742-6723.12740. Epub 2017 Feb 15.	Emerg Med Australas. 2017	PubMed	citation	PMID:28201852	pubmed	28201852	create date:2017/02/16 | first author:Fatovich DM				Viewpoint/ methodology		1
Measurement error and the replication crisis.	/pubmed/28183939	Loken E, Gelman A.	Science. 2017 Feb 10;355(6325):584-585. doi: 10.1126/science.aal3618. No abstract available.	Science. 2017	PubMed	citation	PMID:28183939	pubmed	28183939	create date:2017/02/12 | first author:Loken E				Viewpoint/ methodology		1			Statistical considerations
Telomeres in cancer: tumour suppression and genome instability.	/pubmed/28096526	Maciejowski J, de Lange T.	Nat Rev Mol Cell Biol. 2017 Mar;18(3):175-186. doi: 10.1038/nrm.2016.171. Epub 2017 Jan 18. Review.	Nat Rev Mol Cell Biol. 2017	PubMed	citation	PMID:28096526 | PMCID:PMC5589191	pubmed	28096526	create date:2017/01/18 | first author:Maciejowski J				Not relevant
[Formula: see text]The statistical crisis in science: how is it relevant to clinical neuropsychology?	/pubmed/28075223	Gelman A, Geurts HM.	Clin Neuropsychol. 2017 Aug - Oct;31(6-7):1000-1014. doi: 10.1080/13854046.2016.1277557. Epub 2017 Jan 11.	Clin Neuropsychol. 2017	PubMed	citation	PMID:28075223	pubmed	28075223	create date:2017/01/12 | first author:Gelman A				Viewpoint/ methodology		1
DNA replication proteins as potential targets for antimicrobials in drug-resistant bacterial pathogens.	/pubmed/28073967	van Eijk E, Wittekoek B, Kuijper EJ, Smits WK.	J Antimicrob Chemother. 2017 May 1;72(5):1275-1284. doi: 10.1093/jac/dkw548.	J Antimicrob Chemother. 2017	PubMed	citation	PMID:28073967 | PMCID:PMC5400081	pubmed	28073967	create date:2017/01/12 | first author:van Eijk E				Not relevant
Detection of Viral RNA in Tissues following Plasma Clearance from an Ebola Virus Infected Patient.	/pubmed/28056096	Biava M, Caglioti C, Bordi L, Castilletti C, Colavita F, Quartu S, Nicastri E, Lauria FN, Petrosillo N, Lanini S, Hoenen T, Kobinger G, Zumla A, Di Caro A, Ippolito G, Capobianchi MR, Lalle E.	PLoS Pathog. 2017 Jan 5;13(1):e1006065. doi: 10.1371/journal.ppat.1006065. eCollection 2017 Jan.	PLoS Pathog. 2017	PubMed	citation	PMID:28056096 | PMCID:PMC5215833	pubmed	28056096	create date:2017/01/06 | first author:Biava M				Not relevant
Peculiarities of Yeasts and Human Telomerase RNAs Processing.	/pubmed/28050263	Rubtsova MP, Vasilkova DP, Naraykina YV, Dontsova OA.	Acta Naturae. 2016 Oct-Dec;8(4):14-22.	Acta Naturae. 2016	PubMed	citation	PMID:28050263 | PMCID:PMC5199203	pubmed	28050263	create date:2017/01/05 | first author:Rubtsova MP				Not relevant
Do Student Samples Provide an Accurate Estimate of the General Public?	/pubmed/28002494	Hanel PH, Vione KC.	PLoS One. 2016 Dec 21;11(12):e0168354. doi: 10.1371/journal.pone.0168354. eCollection 2016.	PLoS One. 2016	PubMed	citation	PMID:28002494 | PMCID:PMC5176168	pubmed	28002494	create date:2016/12/22 | first author:Hanel PH				Original study		1	1		Psychology: Investigates differences between student samples and general public
Publication bias and the canonization of false facts.	/pubmed/27995896	Nissen SB, Magidson T, Gross K, Bergstrom CT.	Elife. 2016 Dec 20;5. pii: e21451. doi: 10.7554/eLife.21451.	Elife. 2016	PubMed	citation	PMID:27995896 | PMCID:PMC5173326	pubmed	27995896	create date:2016/12/21 | first author:Nissen SB				Original study		1	1		Sciences: Models the effects of publication bias
Can the behavioral sciences self-correct? A social epistemic study.	/pubmed/27938722	Romero F.	Stud Hist Philos Sci. 2016 Dec;60:55-69. doi: 10.1016/j.shpsa.2016.10.002. Epub 2016 Nov 10.	Stud Hist Philos Sci. 2016	PubMed	citation	PMID:27938722	pubmed	27938722	create date:2016/12/13 | first author:Romero F				Original study		1	1		Statistical modelling of self-correction in behavioural sciences
Cytoarchitecture of Zika virus infection in human neuroblastoma and Aedes albopictus cell lines.	/pubmed/27863275	Offerdahl DK, Dorward DW, Hansen BT, Bloom ME.	Virology. 2017 Jan 15;501:54-62. doi: 10.1016/j.virol.2016.11.002. Epub 2016 Nov 16.	Virology. 2017	PubMed	citation	PMID:27863275 | PMCID:PMC5201448	pubmed	27863275	create date:2016/11/20 | first author:Offerdahl DK				Not relevant
The next step in translational research: lessons learned from the first preclinical randomized controlled trial.	/pubmed/26968835	Llovera G, Liesz A.	J Neurochem. 2016 Oct;139 Suppl 2:271-279. doi: 10.1111/jnc.13516. Epub 2016 Mar 10. Review.	J Neurochem. 2016	PubMed	citation	PMID:26968835	pubmed	26968835	create date:2016/11/01 | first author:Llovera G				Review/ methodology		1
Integrated Computational Approach for Virtual Hit Identification against Ebola Viral Proteins VP35 and VP40.	/pubmed/27792169	Mirza MU, Ikram N.	Int J Mol Sci. 2016 Oct 26;17(11). pii: E1748.	Int J Mol Sci. 2016	PubMed	citation	PMID:27792169 | PMCID:PMC5133775	pubmed	27792169	create date:2016/10/30 | first author:Mirza MU				Not relevant
A Tutorial on Hunting Statistical Significance by Chasing N.	/pubmed/27713723	Szucs D.	Front Psychol. 2016 Sep 22;7:1444. eCollection 2016.	Front Psychol. 2016	PubMed	citation	PMID:27713723 | PMCID:PMC5031612	pubmed	27713723	create date:2016/10/08 | first author:Szucs D				Methodological study		1			Demonstrates statistical pitfalls/ data dredging
Acute Liver Damage Associated with Innate Immune Activation in a Small Nonhuman Primate Model of Hepacivirus Infection.	/pubmed/27489267	Manickam C, Rajakumar P, Wachtman L, Kramer JA, Martinot AJ, Varner V, Giavedoni LD, Reeves RK.	J Virol. 2016 Sep 29;90(20):9153-62. doi: 10.1128/JVI.01051-16. Print 2016 Oct 15.	J Virol. 2016	PubMed	citation	PMID:27489267 | PMCID:PMC5044824	pubmed	27489267	create date:2016/08/05 | first author:Manickam C				Not relevant
Is There a Free Lunch in Inference?	/pubmed/27489199	Rouder JN, Morey RD, Verhagen J, Province JM, Wagenmakers EJ.	Top Cogn Sci. 2016 Jul;8(3):520-47. doi: 10.1111/tops.12214.	Top Cogn Sci. 2016	PubMed	citation	PMID:27489199	pubmed	27489199	create date:2016/08/05 | first author:Rouder JN				Viewpoint/ methodology		1			Statistical methods
Psychology, replication & beyond.	/pubmed/27251381	Laws KR.	BMC Psychol. 2016 Jun 1;4(1):30. doi: 10.1186/s40359-016-0135-2.	BMC Psychol. 2016	PubMed	citation	PMID:27251381 | PMCID:PMC4888260	pubmed	27251381	create date:2016/06/03 | first author:Laws KR				Review		1			Replication crisis in psychology
The Priority position paper: Protecting Europe's food chain from prions.	/pubmed/27220820	Requena JR, Kristensson K, Korth C, Zurzolo C, Simmons M, Aguilar-Calvo P, Aguzzi A, Andreoletti O, Benestad SL, BÌ¦hm R, Brown K, Calgua B, Del RÌ_o JA, Espinosa JC, Girones R, Godsave S, Hoelzle LE, Knittler MR, Kuhn F, Legname G, Laeven P, Mabbott N, et al.	Prion. 2016 May 3;10(3):165-81. doi: 10.1080/19336896.2016.1175801.	Prion. 2016	PubMed	citation	PMID:27220820 | PMCID:PMC4981192	pubmed	27220820	create date:2016/05/26 | first author:Requena JR				Not relevant
Reproducibility Crisis: Are We Ignoring Reaction Norms?	/pubmed/27211784	Voelkl B, WÌ_rbel H.	Trends Pharmacol Sci. 2016 Jul;37(7):509-10. doi: 10.1016/j.tips.2016.05.003. Epub 2016 May 20. No abstract available.	Trends Pharmacol Sci. 2016	PubMed	citation	PMID:27211784	pubmed	27211784	create date:2016/05/24 | first author:Voelkl B				Viewpoint/ methodology		1			Biomedical preclinical research
The Experiment Factory: Standardizing Behavioral Experiments.	/pubmed/27199843	Sochat VV, Eisenberg IW, Enkavi AZ, Li J, Bissett PG, Poldrack RA.	Front Psychol. 2016 Apr 26;7:610. doi: 10.3389/fpsyg.2016.00610. eCollection 2016.	Front Psychol. 2016	PubMed	citation	PMID:27199843 | PMCID:PMC4844768	pubmed	27199843	create date:2016/05/21 | first author:Sochat VV				Viewpoint/ methodology		1			Provides an open access tool to standardise behavioural studies
Rapid Inhibition Profiling in Bacillus subtilis to Identify the Mechanism of Action of New Antimicrobials.	/pubmed/27193499	Lamsa A, Lopez-Garrido J, Quach D, Riley EP, Pogliano J, Pogliano K.	ACS Chem Biol. 2016 Aug 19;11(8):2222-31. doi: 10.1021/acschembio.5b01050. Epub 2016 Jun 14.	ACS Chem Biol. 2016	PubMed	citation	PMID:27193499 | PMCID:PMC5459310	pubmed	27193499	create date:2016/05/20 | first author:Lamsa A				Not relevant
Improving the rigor of psychophysiology research.	/pubmed/27133157	Baldwin SA.	Int J Psychophysiol. 2017 Jan;111:5-16. doi: 10.1016/j.ijpsycho.2016.04.006. Epub 2016 Apr 29.	Int J Psychophysiol. 2017	PubMed	citation	PMID:27133157	pubmed	27133157	create date:2016/05/03 | first author:Baldwin SA				Viewpoint/ methodology		1			Psychology
The genomic characteristics and cellular origin of chromothripsis.	/pubmed/27023493	StorchovÌÁ Z, Kloosterman WP.	Curr Opin Cell Biol. 2016 Jun;40:106-113. doi: 10.1016/j.ceb.2016.03.003. Epub 2016 Mar 26. Review.	Curr Opin Cell Biol. 2016	PubMed	citation	PMID:27023493	pubmed	27023493	create date:2016/03/30 | first author:StorchovÌÁ Z				Not relevant
Quality Issues of Research Antibodies.	/pubmed/27013861	Weller MG.	Anal Chem Insights. 2016 Mar 20;11:21-7. doi: 10.4137/ACI.S31614. eCollection 2016. Review.	Anal Chem Insights. 2016	PubMed	citation	PMID:27013861 | PMCID:PMC4803150	pubmed	27013861	create date:2016/03/26 | first author:Weller MG				Viewpoint/ methodology		1			Antibody quality
The Problem of False Discovery: Many Scientific Results Can't Be Replicated, Leading to Serious Questions about What's True and False in the World of Research.	/pubmed/26978851	Foster KR, Skufca J.	IEEE Pulse. 2016 Mar-Apr;7(2):37-40. doi: 10.1109/MPUL.2015.2513726.	IEEE Pulse. 2016	PubMed	citation	PMID:26978851	pubmed	26978851	create date:2016/03/16 | first author:Foster KR				Review		1			Sciences
Drug repurposing to target Ebola virus replication and virulence using structural systems pharmacology.	/pubmed/26887654	Zhao Z, Martin C, Fan R, Bourne PE, Xie L.	BMC Bioinformatics. 2016 Feb 18;17:90. doi: 10.1186/s12859-016-0941-9.	BMC Bioinformatics. 2016	PubMed	citation	PMID:26887654 | PMCID:PMC4757998	pubmed	26887654	create date:2016/02/19 | first author:Zhao Z				Not relevant
Rigor and replication in time-frequency analyses of cognitive electrophysiology data.	/pubmed/26876335	Cohen MX.	Int J Psychophysiol. 2017 Jan;111:80-87. doi: 10.1016/j.ijpsycho.2016.02.001. Epub 2016 Feb 11.	Int J Psychophysiol. 2017	PubMed	citation	PMID:26876335	pubmed	26876335	create date:2016/02/16 | first author:Cohen MX				Viewpoint/ methodology		1			Neurosciences
Update of the human parvovirus B19 biology.	/pubmed/26778837	Servant-Delmas A, Morinet F.	Transfus Clin Biol. 2016 Feb;23(1):5-12. doi: 10.1016/j.tracli.2015.11.006. Epub 2016 Jan 6. Review.	Transfus Clin Biol. 2016	PubMed	citation	PMID:26778837	pubmed	26778837	create date:2016/01/19 | first author:Servant-Delmas A				Not relevant
Inference Based on the Best-Fitting Model can Contribute to the Replication Crisis: Assessing Model Selection Uncertainty Using a Bootstrap Approach.	/pubmed/28663687	Lubke GH, Campbell I.	Struct Equ Modeling. 2016;23(4):479-490. doi: 10.1080/10705511.2016.1141355. Epub 2016 Apr 7.	Struct Equ Modeling. 2016	PubMed	citation	PMID:28663687 | PMCID:PMC5487004	pubmed	28663687	create date:2016/01/01 | first author:Lubke GH				Original study		1	1		Analyses modelling methodology
A Short (Personal) Future History of Revolution 2.0.	/pubmed/26581743	Spellman BA.	Perspect Psychol Sci. 2015 Nov;10(6):886-99. doi: 10.1177/1745691615609918.	Perspect Psychol Sci. 2015	PubMed	citation	PMID:26581743	pubmed	26581743	create date:2015/11/20 | first author:Spellman BA				Viewpoint/ methodology		1			Primarily Psychology but also touches other disciplines
Complex interactions between the DNA-damage response and mammalian telomeres.	/pubmed/26581520	Arnoult N, Karlseder J.	Nat Struct Mol Biol. 2015 Nov;22(11):859-66. doi: 10.1038/nsmb.3092. Review.	Nat Struct Mol Biol. 2015	PubMed	citation	PMID:26581520 | PMCID:PMC4739752	pubmed	26581520	create date:2015/11/20 | first author:Arnoult N				Not relevant
A ëÈ Cro-Like Repressor Is Essential for the Induction of Conjugative Transfer of SXT/R391 Elements in Response to DNA Damage.	/pubmed/26438816	Poulin-Laprade D, Burrus V.	J Bacteriol. 2015 Dec;197(24):3822-33. doi: 10.1128/JB.00638-15. Epub 2015 Oct 5.	J Bacteriol. 2015	PubMed	citation	PMID:26438816 | PMCID:PMC4652052	pubmed	26438816	create date:2015/10/07 | first author:Poulin-Laprade D				Not relevant
Everybody knows psychology is not a real science": Public perceptions of psychology and how we can improve our relationship with policymakers, the scientific community, and the general public.	/pubmed/26348335	Ferguson CJ.	Am Psychol. 2015 Sep;70(6):527-42. doi: 10.1037/a0039405.	Am Psychol. 2015	PubMed	citation	PMID:26348335	pubmed	26348335	create date:2015/09/09 | first author:Ferguson CJ				Not relevant
Is psychology suffering from a replication crisis? What does "failure to replicate" really mean?	/pubmed/26348332	Maxwell SE, Lau MY, Howard GS.	Am Psychol. 2015 Sep;70(6):487-98. doi: 10.1037/a0039400.	Am Psychol. 2015	PubMed	citation	PMID:26348332	pubmed	26348332	create date:2015/09/09 | first author:Maxwell SE				Viewpoint/ methodology		1			Psychology: Suggest improved statistical methods
A tragedy of the (academic) commons: interpreting the replication crisis in psychology as a social dilemma for early-career researchers.	/pubmed/26300832	Everett JA, Earp BD.	Front Psychol. 2015 Aug 6;6:1152. doi: 10.3389/fpsyg.2015.01152. eCollection 2015. No abstract available.	Front Psychol. 2015	PubMed	citation	PMID:26300832 | PMCID:PMC4527093	pubmed	26300832	create date:2015/08/25 | first author:Everett JA				Viewpoint/ methodology		1			Pschycology: Opinion
Beyond Power Calculations: Assessing Type S (Sign) and Type M (Magnitude) Errors.	/pubmed/26186114	Gelman A, Carlin J.	Perspect Psychol Sci. 2014 Nov;9(6):641-51. doi: 10.1177/1745691614551642.	Perspect Psychol Sci. 2014	PubMed	citation	PMID:26186114	pubmed	26186114	create date:2015/07/18 | first author:Gelman A				Viewpoint/ methodology		1			Psychology: Suggest improved statistical methods
Differences in Establishment of Persistence of Vaccine and Wild Type Rubella Viruses in Fetal Endothelial Cells.	/pubmed/26177032	Perelygina L, Adebayo A, Metcalfe M, Icenogle J.	PLoS One. 2015 Jul 15;10(7):e0133267. doi: 10.1371/journal.pone.0133267. eCollection 2015.	PLoS One. 2015	PubMed	citation	PMID:26177032 | PMCID:PMC4503567	pubmed	26177032	create date:2015/07/16 | first author:Perelygina L				Not relevant
Development of a Model System for Tick-Borne Flavivirus Persistence in HEK 293T Cells.	/pubmed/26045539	Mlera L, Offerdahl DK, Martens C, Porcella SF, Melik W, Bloom ME.	MBio. 2015 Jun 4;6(3):e00614. doi: 10.1128/mBio.00614-15.	MBio. 2015	PubMed	citation	PMID:26045539 | PMCID:PMC4462619	pubmed	26045539	create date:2015/06/06 | first author:Mlera L				Not relevant
Replication, falsification, and the crisis of confidence in social psychology.	/pubmed/26042061	Earp BD, Trafimow D.	Front Psychol. 2015 May 19;6:621. doi: 10.3389/fpsyg.2015.00621. eCollection 2015.	Front Psychol. 2015	PubMed	citation	PMID:26042061 | PMCID:PMC4436798	pubmed	26042061	create date:2015/06/05 | first author:Earp BD				Viewpoint/ methodology		1			Psychology: Statistical methods
The use of pseudotypes to study viruses, virus sero-epidemiology and vaccination.	/pubmed/25936665	Bentley EM, Mather ST, Temperton NJ.	Vaccine. 2015 Jun 12;33(26):2955-62. doi: 10.1016/j.vaccine.2015.04.071. Epub 2015 Apr 30.	Vaccine. 2015	PubMed	citation	PMID:25936665	pubmed	25936665	create date:2015/05/06 | first author:Bentley EM				Not relevant
Alpha-Linolenic Acid-Induced Increase in Neurogenesis is a Key Factor in the Improvement in the Passive Avoidance Task After Soman Exposure.	/pubmed/25920465	Piermartiri TC, Pan H, Chen J, McDonough J, Grunberg N, Apland JP, Marini AM.	Neuromolecular Med. 2015 Sep;17(3):251-69. doi: 10.1007/s12017-015-8353-y. Epub 2015 Apr 29.	Neuromolecular Med. 2015	PubMed	citation	PMID:25920465	pubmed	25920465	create date:2015/04/30 | first author:Piermartiri TC				Not relevant
A reminder on millisecond timing accuracy and potential replication failure in computer-based psychology experiments: An open letter.	/pubmed/25761394	Plant RR.	Behav Res Methods. 2016 Mar;48(1):408-11. doi: 10.3758/s13428-015-0577-0.	Behav Res Methods. 2016	PubMed	citation	PMID:25761394	pubmed	25761394	create date:2015/03/13 | first author:Plant RR				Viewpoint/ methodology		1			Psychology: Methodology, millisecond timing error
A purely confirmatory replication study of structural brain-behavior correlations.	/pubmed/25684445	Boekel W, Wagenmakers EJ, Belay L, Verhagen J, Brown S, Forstmann BU.	Cortex. 2015 May;66:115-33. doi: 10.1016/j.cortex.2014.11.019. Epub 2015 Jan 14.	Cortex. 2015	PubMed	citation	PMID:25684445	pubmed	25684445	create date:2015/02/17 | first author:Boekel W				Original study		1	1		Psychology: Lack of successful replication of five studies
Murine gammaherpesvirus (MHV-68) transforms cultured cells in vitro.	/pubmed/25677084	MrÌÁzovÌÁ V, BetÌÁkovÌÁ T, KÌ¼delovÌÁ M, ÊupolÌ_kovÌÁ M, LachovÌÁ V, LapunÌ_kovÌÁ B, Golais F.	Intervirology. 2015;58(2):69-72. doi: 10.1159/000370071. Epub 2015 Feb 13.	Intervirology. 2015	PubMed	citation	PMID:25677084	pubmed	25677084	create date:2015/02/14 | first author:MrÌÁzovÌÁ V				Not relevant
Human papillomavirus carcinogenesis: an identity crisis in the retinoblastoma tumor suppressor pathway.	/pubmed/25673729	Munger K, Jones DL.	J Virol. 2015 May;89(9):4708-11. doi: 10.1128/JVI.03486-14. Epub 2015 Feb 11. Review.	J Virol. 2015	PubMed	citation	PMID:25673729 | PMCID:PMC4403492	pubmed	25673729	create date:2015/02/13 | first author:Munger K				Not relevant
Sensory gating deficits in the attenuated psychosis syndrome.	/pubmed/25556079	Shaikh M, Dutt A, Broome MR, Vozmediano AG, Ranlund S, Diez A, Caseiro O, Lappin J, Amankwa S, Carletti F, Fusar-Poli P, Walshe M, Hall MH, Howes O, Ellett L, Murray RM, McGuire P, Valmaggia L, Bramon E.	Schizophr Res. 2015 Feb;161(2-3):277-82. doi: 10.1016/j.schres.2014.12.021. Epub 2014 Dec 30.	Schizophr Res. 2015	PubMed	citation	PMID:25556079	pubmed	25556079	create date:2015/01/04 | first author:Shaikh M				Not relevant
Fifteen years after treatment: a follow-up study of comprehensive vocationally-oriented psychotherapy.	/pubmed/25545429	Shore MF, Massimo JL.	Am J Orthopsychiatry. 2014 Nov;84(6):619-23. doi: 10.1037/h0100166.	Am J Orthopsychiatry. 2014	PubMed	citation	PMID:25545429	pubmed	25545429	create date:2014/12/30 | first author:Shore MF				Not relevant
When more data steer us wrong: replications with the wrong dependent measure perpetuate erroneous conclusions.	/pubmed/25384892	Rotello CM, Heit E, DubÌ© C.	Psychon Bull Rev. 2015 Aug;22(4):944-54. doi: 10.3758/s13423-014-0759-2. Review.	Psychon Bull Rev. 2015	PubMed	citation	PMID:25384892	pubmed	25384892	create date:2014/11/12 | first author:Rotello CM				Viewpoint/ methodology		1			Psychology: Interpretive errors
Metascience could rescue the 'replication crisis'.	/pubmed/25373639	Schooler JW.	Nature. 2014 Nov 6;515(7525):9. doi: 10.1038/515009a. No abstract available.	Nature. 2014	PubMed	citation	PMID:25373639	pubmed	25373639	create date:2014/11/07 | first author:Schooler JW				Viewpoint/ methodology		1			Psychology: Comment/ personal view
New forms of checks and balances are needed to improve research integrity.	/pubmed/25324963	Iorns E, Chong C.	F1000Res. 2014 May 28;3:119. doi: 10.12688/f1000research.3714.1. eCollection 2014.	F1000Res. 2014	PubMed	citation	PMID:25324963 | PMCID:PMC4197740	pubmed	25324963	create date:2014/10/18 | first author:Iorns E				Viewpoint/ methodology		1			Opinion on scientific methodology
Human parvovirus B19: a review.	/pubmed/25283854	Rogo LD, Mokhtari-Azad T, Kabir MH, Rezaei F.	Acta Virol. 2014;58(3):199-213. Review.	Acta Virol. 2014	PubMed	citation	PMID:25283854	pubmed	25283854	create date:2014/10/07 | first author:Rogo LD				Not relevant
[Interpersonal psychotherapy: a model of intervention for borderline personality disorder].	/pubmed/25174691	Bellino S, Bozzatello P, De Grandi E, Bogetto F.	Riv Psichiatr. 2014 Jul-Aug;49(4):158-63. doi: 10.1708/1600.17450. Italian.	Riv Psichiatr. 2014	PubMed	citation	PMID:25174691	pubmed	25174691	create date:2014/09/02 | first author:Bellino S				Not relevant
Peer training of community health workers to improve heart health among African American women.	/pubmed/24891525	Josiah Willock R, Mayberry RM, Yan F, Daniels P.	Health Promot Pract. 2015 Jan;16(1):63-71. doi: 10.1177/1524839914535775. Epub 2014 Jun 2.	Health Promot Pract. 2015	PubMed	citation	PMID:24891525 | PMCID:PMC4784710	pubmed	24891525	create date:2014/06/04 | first author:Josiah Willock R				Not relevant
Continuously Cumulating Meta-Analysis and Replicability.	/pubmed/26173268	Braver SL, Thoemmes FJ, Rosenthal R.	Perspect Psychol Sci. 2014 May;9(3):333-42. doi: 10.1177/1745691614529796.	Perspect Psychol Sci. 2014	PubMed	citation	PMID:26173268	pubmed	26173268	create date:2014/05/01 | first author:Braver SL				Viewpoint/ methodology		1			Psychology: Improved statistical methods
Expectations for Replications: Are Yours Realistic?	/pubmed/26173266	Stanley DJ, Spence JR.	Perspect Psychol Sci. 2014 May;9(3):305-18. doi: 10.1177/1745691614528518.	Perspect Psychol Sci. 2014	PubMed	citation	PMID:26173266	pubmed	26173266	create date:2014/05/01 | first author:Stanley DJ				Original study		1	1		Psychology: Modelling study that suggests that the expectations of reproducibility are unrealistic
A two-site pilot randomized 3 day trial of high dose left prefrontal repetitive transcranial magnetic stimulation (rTMS) for suicidal inpatients.	/pubmed/24731434	George MS, Raman R, Benedek DM, Pelic CG, Grammer GG, Stokes KT, Schmidt M, Spiegel C, Dealmeida N, Beaver KL, Borckardt JJ, Sun X, Jain S, Stein MB.	Brain Stimul. 2014 May-Jun;7(3):421-31. doi: 10.1016/j.brs.2014.03.006. Epub 2014 Mar 19.	Brain Stimul. 2014	PubMed	citation	PMID:24731434	pubmed	24731434	create date:2014/04/16 | first author:George MS				Not relevant
The Alleged Crisis and the Illusion of Exact Replication.	/pubmed/26173241	Stroebe W, Strack F.	Perspect Psychol Sci. 2014 Jan;9(1):59-71. doi: 10.1177/1745691613514450.	Perspect Psychol Sci. 2014	PubMed	citation	PMID:26173241	pubmed	26173241	create date:2014/01/01 | first author:Stroebe W				Viewpoint/ methodology		1			Psychology: Discusses requirements for replication studies
Hematopoietic stem cells are acutely sensitive to Acd shelterin gene inactivation.	/pubmed/24316971	Jones M, Osawa G, Regal JA, Weinberg DN, Taggart J, Kocak H, Friedman A, Ferguson DO, Keegan CE, Maillard I.	J Clin Invest. 2014 Jan;124(1):353-66. doi: 10.1172/JCI67871. Epub 2013 Dec 9.	J Clin Invest. 2014	PubMed	citation	PMID:24316971 | PMCID:PMC3967656	pubmed	24316971	create date:2013/12/10 | first author:Jones M				Not relevant
Extracellular hemin crisis triggers acute chest syndrome in sickle mice.	/pubmed/24084741	Ghosh S, Adisa OA, Chappa P, Tan F, Jackson KA, Archer DR, Ofori-Acquah SF.	J Clin Invest. 2013 Nov;123(11):4809-20.	J Clin Invest. 2013	PubMed	citation	PMID:24084741 | PMCID:PMC3809772	pubmed	24084741	create date:2013/10/03 | first author:Ghosh S				Not relevant
Gene-centric association study of acute chest syndrome and painful crisis in sickle cell disease patients.	/pubmed/23719301	Galarneau G, Coady S, Garrett ME, Jeffries N, Puggal M, Paltoo D, Soldano K, Guasch A, Ashley-Koch AE, Telen MJ, Kutlar A, Lettre G, Papanicolaou GJ.	Blood. 2013 Jul 18;122(3):434-42. doi: 10.1182/blood-2013-01-478776. Epub 2013 May 29.	Blood. 2013	PubMed	citation	PMID:23719301 | PMCID:PMC3716204	pubmed	23719301	create date:2013/05/31 | first author:Galarneau G				Not relevant
ATM-dependent DNA damage-response pathway as a determinant in chronic myelogenous leukemia.	/pubmed/23694754	Takagi M, Sato M, Piao J, Miyamoto S, Isoda T, Kitagawa M, Honda H, Mizutani S.	DNA Repair (Amst). 2013 Jul;12(7):500-7. doi: 10.1016/j.dnarep.2013.04.022. Epub 2013 May 19.	DNA Repair (Amst). 2013	PubMed	citation	PMID:23694754	pubmed	23694754	create date:2013/05/23 | first author:Takagi M				Not relevant
Comparing the accuracy of experimental estimates to guessing: a new perspective on replication and the "Crisis of Confidence" in psychology.	/pubmed/23661222	Davis-Stober CP, Dana J.	Behav Res Methods. 2014 Mar;46(1):1-14. doi: 10.3758/s13428-013-0342-1.	Behav Res Methods. 2014	PubMed	citation	PMID:23661222	pubmed	23661222	create date:2013/05/11 | first author:Davis-Stober CP				Original study		1	1		Psychology: Suggests improved statistical methods based on a modelling approach
Altered explicit recognition of facial disgust associated with predisposition to suicidal behavior but not depression.	/pubmed/23489393	Richard-Devantoy S, Guillaume S, OliÌ© E, Courtet P, Jollant F.	J Affect Disord. 2013 Sep 5;150(2):590-3. doi: 10.1016/j.jad.2013.01.049. Epub 2013 Mar 13.	J Affect Disord. 2013	PubMed	citation	PMID:23489393	pubmed	23489393	create date:2013/03/16 | first author:Richard-Devantoy S				Not relevant
[Assessing aggressive behaviour at the psychiatric emergency service with a checklist: a replication study].	/pubmed/23408361	Penterman EJ, Nijman HL, Saalmink K, Rasing S, van der Staak CP.	Tijdschr Psychiatr. 2013;55(2):93-100. Dutch.	Tijdschr Psychiatr. 2013	PubMed	citation	PMID:23408361	pubmed	23408361	create date:2013/02/15 | first author:Penterman EJ				Dutch
Separation of intra-S checkpoint protein contributions to DNA replication fork protection and genomic stability in normal human fibroblasts.	/pubmed/23255133	Smith-Roe SL, Patel SS, Zhou Y, Simpson DA, Rao S, Ibrahim JG, Cordeiro-Stone M, Kaufmann WK.	Cell Cycle. 2013 Jan 15;12(2):332-45. doi: 10.4161/cc.23177. Epub 2012 Jan 15.	Cell Cycle. 2013	PubMed	citation	PMID:23255133 | PMCID:PMC3575462	pubmed	23255133	create date:2012/12/21 | first author:Smith-Roe SL				Not relevant
Chromothripsis: chromosomes in crisis.	/pubmed/23153487	Jones MJ, Jallepalli PV.	Dev Cell. 2012 Nov 13;23(5):908-17. doi: 10.1016/j.devcel.2012.10.010. Review.	Dev Cell. 2012	PubMed	citation	PMID:23153487 | PMCID:PMC3514072	pubmed	23153487	create date:2012/11/17 | first author:Jones MJ				Not relevant
Science or Art? How Aesthetic Standards Grease the Way Through the Publication Bottleneck but Undermine Science.	/pubmed/26168113	Giner-Sorolla R.	Perspect Psychol Sci. 2012 Nov;7(6):562-71. doi: 10.1177/1745691612457576.	Perspect Psychol Sci. 2012	PubMed	citation	PMID:26168113	pubmed	26168113	create date:2012/11/01 | first author:Giner-Sorolla R				Viewpoint/ Incentives		1			Psychology: Criticises unrealistic expectations of data quality to publish in recognised journals
Is the Replicability Crisis Overblown? Three Arguments Examined.	/pubmed/26168109	Pashler H, Harris CR.	Perspect Psychol Sci. 2012 Nov;7(6):531-6. doi: 10.1177/1745691612463401.	Perspect Psychol Sci. 2012	PubMed	citation	PMID:26168109	pubmed	26168109	create date:2012/11/01 | first author:Pashler H				Viewpoint/ methodology		1			Psychology: Suggests methodological improvements
Telomere structure and telomerase in health and disease (review).	/pubmed/22941386	Gomez DE, Armando RG, Farina HG, Menna PL, Cerrudo CS, Ghiringhelli PD, Alonso DF.	Int J Oncol. 2012 Nov;41(5):1561-9. doi: 10.3892/ijo.2012.1611. Epub 2012 Aug 29. Review.	Int J Oncol. 2012	PubMed	citation	PMID:22941386 | PMCID:PMC3583695	pubmed	22941386	create date:2012/09/04 | first author:Gomez DE				Not relevant
Major depression in the era of economic crisis: a replication of a cross-sectional study across Greece.	/pubmed/22939388	Economou M, Madianos M, Peppou LE, Patelakis A, Stefanis CN.	J Affect Disord. 2013 Mar 5;145(3):308-14. doi: 10.1016/j.jad.2012.08.008. Epub 2012 Aug 30.	J Affect Disord. 2013	PubMed	citation	PMID:22939388	pubmed	22939388	create date:2012/09/04 | first author:Economou M				Not relevant
Involvement of WRN helicase in immortalization and tumorigenesis by the telomeric crisis pathway (Review).	/pubmed/22848235	Sugimoto M, Furuichi Y, Ide T, Goto M.	Oncol Lett. 2011 Jul;2(4):609-611. Epub 2011 May 6.	Oncol Lett. 2011	PubMed	citation	PMID:22848235 | PMCID:PMC3406460	pubmed	22848235	create date:2012/08/01 | first author:Sugimoto M				Not relevant
An integrated health sector response to violence against women in Malaysia: lessons for supporting scale up.	/pubmed/22828240	Colombini M, Mayhew SH, Ali SH, Shuib R, Watts C.	BMC Public Health. 2012 Jul 24;12:548. doi: 10.1186/1471-2458-12-548.	BMC Public Health. 2012	PubMed	citation	PMID:22828240 | PMCID:PMC3412746	pubmed	22828240	create date:2012/07/26 | first author:Colombini M				Not relevant
Cell lineage analysis of acute leukemia relapse uncovers the role of replication-rate heterogeneity and microsatellite instability.	/pubmed/22645183	Shlush LI, Chapal-Ilani N, Adar R, Pery N, Maruvka Y, Spiro A, Shouval R, Rowe JM, Tzukerman M, Bercovich D, Izraeli S, Marcucci G, Bloomfield CD, Zuckerman T, Skorecki K, Shapiro E.	Blood. 2012 Jul 19;120(3):603-12. doi: 10.1182/blood-2011-10-388629. Epub 2012 May 29.	Blood. 2012	PubMed	citation	PMID:22645183	pubmed	22645183	create date:2012/05/31 | first author:Shlush LI				Not relevant
Sustainable engineered processes to mitigate the global arsenic crisis in drinking water: challenges and progress.	/pubmed/22541048	Sarkar S, Greenleaf JE, Gupta A, Uy D, Sengupta AK.	Annu Rev Chem Biomol Eng. 2012;3:497-517. doi: 10.1146/annurev-chembioeng-062011-081101. Epub 2012 Apr 23. Review.	Annu Rev Chem Biomol Eng. 2012	PubMed	citation	PMID:22541048	pubmed	22541048	create date:2012/05/01 | first author:Sarkar S				Not relevant
Recurrent isochromosome 21 and multiple abnormalities in a patient suspected of having acute myeloid leukemia with eosinophilic differentiation -- a rare case from South India.	/pubmed/22176774	Vijay S, Sarojam S, Raveendran S, Syamala V, Leelakumari S, Narayanan G, Hariharan S.	Chin J Cancer. 2012 Jan;31(1):45-50. doi: 10.5732/cjc.011.10201. Epub 2011 Dec 16.	Chin J Cancer. 2012	PubMed	citation	PMID:22176774 | PMCID:PMC3777464	pubmed	22176774	create date:2011/12/20 | first author:Vijay S				Not relevant
Cumulative stress and maternal prenatal corticotropin-releasing hormone in an urban U.S. cohort.	/pubmed/22154479	Tse AC, Rich-Edwards JW, Koenen K, Wright RJ.	Psychoneuroendocrinology. 2012 Jul;37(7):970-9. doi: 10.1016/j.psyneuen.2011.11.004. Epub 2011 Dec 9.	Psychoneuroendocrinology. 2012	PubMed	citation	PMID:22154479 | PMCID:PMC3400107	pubmed	22154479	create date:2011/12/14 | first author:Tse AC				Not relevant
Epidemiologic evidence for a role of telomere dysfunction in cancer etiology.	/pubmed/21756922	Prescott J, Wentzensen IM, Savage SA, De Vivo I.	Mutat Res. 2012 Feb 1;730(1-2):75-84. doi: 10.1016/j.mrfmmm.2011.06.009. Epub 2011 Jul 2. Review.	Mutat Res. 2012	PubMed	citation	PMID:21756922 | PMCID:PMC3222719	pubmed	21756922	create date:2011/07/16 | first author:Prescott J				Not relevant
Human parvovirus B19: general considerations and impact on patients with sickle-cell disease and thalassemia and on blood transfusions.	/pubmed/21585562	Slavov SN, Kashima S, Pinto AC, Covas DT.	FEMS Immunol Med Microbiol. 2011 Aug;62(3):247-62. doi: 10.1111/j.1574-695X.2011.00819.x. Epub 2011 Jun 15. Review.	FEMS Immunol Med Microbiol. 2011	PubMed	citation	PMID:21585562	pubmed	21585562	create date:2011/05/19 | first author:Slavov SN				Not relevant
Random mtDNA mutations modulate proliferation capacity in mouse embryonic fibroblasts.	/pubmed/21575603	Kukat A, Edgar D, Bratic I, Maiti P, Trifunovic A.	Biochem Biophys Res Commun. 2011 Jun 10;409(3):394-9. doi: 10.1016/j.bbrc.2011.04.145. Epub 2011 May 7.	Biochem Biophys Res Commun. 2011	PubMed	citation	PMID:21575603	pubmed	21575603	create date:2011/05/18 | first author:Kukat A				Not relevant
Inhibitor of cyclin-dependent kinase (CDK) interacting with cyclin A1 (INCA1) regulates proliferation and is repressed by oncogenic signaling.	/pubmed/21540187	BÌ_umer N, Tickenbrock L, Tschanter P, Lohmeyer L, Diederichs S, BÌ_umer S, Skryabin BV, Zhang F, Agrawal-Singh S, KÌ¦hler G, Berdel WE, Serve H, Koschmieder S, MÌ_ller-Tidow C.	J Biol Chem. 2011 Aug 12;286(32):28210-22. doi: 10.1074/jbc.M110.203471. Epub 2011 May 3.	J Biol Chem. 2011	PubMed	citation	PMID:21540187 | PMCID:PMC3151066	pubmed	21540187	create date:2011/05/05 | first author:BÌ_umer N				Not relevant
MYC in chronic myeloid leukemia: induction of aberrant DNA synthesis and association with poor response to imatinib.	/pubmed/21460180	Albajar M, GÌ_mez-Casares MT, Llorca J, Mauleon I, VaquÌ© JP, Acosta JC, BermÌ¼dez A, Donato N, Delgado MD, LeÌ_n J.	Mol Cancer Res. 2011 May;9(5):564-76. doi: 10.1158/1541-7786.MCR-10-0356. Epub 2011 Apr 1.	Mol Cancer Res. 2011	PubMed	citation	PMID:21460180	pubmed	21460180	create date:2011/04/05 | first author:Albajar M				Not relevant
Telomerase: structure, functions, and activity regulation.	/pubmed/21417995	Zvereva MI, Shcherbakova DM, Dontsova OA.	Biochemistry (Mosc). 2010 Dec;75(13):1563-83. Review.	Biochemistry (Mosc). 2010	PubMed	citation	PMID:21417995	pubmed	21417995	create date:2011/03/23 | first author:Zvereva MI				Not relevant
Parvoviruses.	/pubmed/21413262	Pattison JR, Patou G.	In: Baron S, editor. Medical Microbiology. 4th edition. Galveston (TX): University of Texas Medical Branch at Galveston; 1996. Chapter 64.	Medical Microbiology. 1996	PubMed	citation	PMID:21413262	pubmed	21413262	create date:2011/03/18 | first author:Pattison JR				Not relevant
[Mechanisms of multi-organ failure in severe influenza].	/pubmed/20715496	Kido H, Chida J, Yao M, Wang S.	Nihon Rinsho. 2010 Aug;68(8):1565-73. Review. Japanese.	Nihon Rinsho. 2010	PubMed	citation	PMID:20715496	pubmed	20715496	create date:2010/08/19 | first author:Kido H				Japanese
Spi-1/PU.1 oncogene accelerates DNA replication fork elongation and promotes genetic instability in the absence of DNA breakage.	/pubmed/20660370	RimmelÌ© P, Komatsu J, HupÌ© P, Roulin C, Barillot E, Dutreix M, Conseiller E, Bensimon A, Moreau-Gachelin F, Guillouf C.	Cancer Res. 2010 Sep 1;70(17):6757-66. doi: 10.1158/0008-5472.CAN-09-4691. Epub 2010 Jul 21.	Cancer Res. 2010	PubMed	citation	PMID:20660370	pubmed	20660370	create date:2010/07/28 | first author:RimmelÌ© P				Not relevant
Advances in human B19 erythrovirus biology.	/pubmed/20631151	Servant-Delmas A, LefrÌ¬re JJ, Morinet F, Pillet S.	J Virol. 2010 Oct;84(19):9658-65. doi: 10.1128/JVI.00684-10. Epub 2010 Jul 14. Review.	J Virol. 2010	PubMed	citation	PMID:20631151 | PMCID:PMC2937825	pubmed	20631151	create date:2010/07/16 | first author:Servant-Delmas A				Not relevant
The fundamental units, processes and patterns of evolution, and the tree of life conundrum.	/pubmed/19788730	Koonin EV, Wolf YI.	Biol Direct. 2009 Sep 29;4:33. doi: 10.1186/1745-6150-4-33.	Biol Direct. 2009	PubMed	citation	PMID:19788730 | PMCID:PMC2761301	pubmed	19788730	create date:2009/10/01 | first author:Koonin EV				Not relevant
Human papillomavirus (HPV) type 18 induces extended growth in primary human cervical, tonsillar, or foreskin keratinocytes more effectively than other high-risk mucosal HPVs.	/pubmed/19740985	Lace MJ, Anson JR, Klingelhutz AJ, Lee JH, Bossler AD, Haugen TH, Turek LP.	J Virol. 2009 Nov;83(22):11784-94. doi: 10.1128/JVI.01370-09. Epub 2009 Sep 9.	J Virol. 2009	PubMed	citation	PMID:19740985 | PMCID:PMC2772696	pubmed	19740985	create date:2009/09/11 | first author:Lace MJ				Not relevant
Telomeres and telomerase in chronic myeloid leukaemia: impact for pathogenesis, disease progression and targeted therapy.	/pubmed/19569255	Keller G, Brassat U, Braig M, Heim D, Wege H, BrÌ_mmendorf TH.	Hematol Oncol. 2009 Sep;27(3):123-9. doi: 10.1002/hon.901. Review.	Hematol Oncol. 2009	PubMed	citation	PMID:19569255	pubmed	19569255	create date:2009/07/02 | first author:Keller G				Not relevant
Inhibitory effect of wild-type p53 gene on excessive replication of centrosomes in leukemia cell line K562.	/pubmed/19550118	Tian WJ, Feng WL, Wang HB, Huang SF, Cao WX, Huang ZG.	Ai Zheng. 2009 Feb;28(2):122-6. Epub 2009 Feb 23.	Ai Zheng. 2009	PubMed	citation	PMID:19550118	pubmed	19550118	create date:2009/06/25 | first author:Tian WJ				Not relevant
Enhanced expression of p210BCR/ABL and aberrant expression of Zfp423/ZNF423 induce blast crisis of chronic myelogenous leukemia.	/pubmed/19234145	Miyazaki K, Yamasaki N, Oda H, Kuwata T, Kanno Y, Miyazaki M, Komeno Y, Kitaura J, Honda Z, Warming S, Jenkins NA, Copeland NG, Kitamura T, Nakamura T, Honda H.	Blood. 2009 May 7;113(19):4702-10. doi: 10.1182/blood-2007-05-088724. Epub 2009 Feb 20.	Blood. 2009	PubMed	citation	PMID:19234145	pubmed	19234145	create date:2009/02/24 | first author:Miyazaki K				Not relevant
Preclinical studies of vorinostat (suberoylanilide hydroxamic acid) combined with cytosine arabinoside and etoposide for treatment of acute leukemias.	/pubmed/19223502	Shiozawa K, Nakanishi T, Tan M, Fang HB, Wang WC, Edelman MJ, Carlton D, Gojo I, Sausville EA, Ross DD.	Clin Cancer Res. 2009 Mar 1;15(5):1698-707. doi: 10.1158/1078-0432.CCR-08-1587. Epub 2009 Feb 17.	Clin Cancer Res. 2009	PubMed	citation	PMID:19223502	pubmed	19223502	create date:2009/02/19 | first author:Shiozawa K				Not relevant
Altered states of telomere deprotection and the two-stage mechanism of replicative aging.	/pubmed/19223460	Zou Y, Misri S, Shay JW, Pandita TK, Wright WE.	Mol Cell Biol. 2009 May;29(9):2390-7. doi: 10.1128/MCB.01569-08. Epub 2009 Feb 17.	Mol Cell Biol. 2009	PubMed	citation	PMID:19223460 | PMCID:PMC2668373	pubmed	19223460	create date:2009/02/19 | first author:Zou Y				Not relevant
Mitotic crisis: the unmasking of a novel role for RPA.	/pubmed/19176996	Anantha RW, Borowiec JA.	Cell Cycle. 2009 Feb 1;8(3):357-61. Epub 2009 Feb 21. Review.	Cell Cycle. 2009	PubMed	citation	PMID:19176996 | PMCID:PMC3397920	pubmed	19176996	create date:2009/01/30 | first author:Anantha RW				Not relevant
Achieving clinical equality in an influenza pandemic: patent realities.	/pubmed/20718133	Kane EM.	Seton Hall Law Rev. 2009;39(4):1137-72.	Seton Hall Law Rev. 2009	PubMed	citation	PMID:20718133	pubmed	20718133	create date:2009/01/01 | first author:Kane EM				Not relevant
Respiratory syncytial virus and influenza virus infections: observations from tissues of fatal infant cases.	/pubmed/18820587	Welliver TP, Reed JL, Welliver RC Sr.	Pediatr Infect Dis J. 2008 Oct;27(10 Suppl):S92-6. doi: 10.1097/INF.0b013e318168b706.	Pediatr Infect Dis J. 2008	PubMed	citation	PMID:18820587	pubmed	18820587	create date:2008/10/23 | first author:Welliver TP				Not relevant
Telomerase deficiency affects the formation of chromosomal translocations by homologous recombination in Saccharomyces cerevisiae.	/pubmed/18830407	Meyer DH, Bailis AM.	PLoS One. 2008 Oct 2;3(10):e3318. doi: 10.1371/journal.pone.0003318.	PLoS One. 2008	PubMed	citation	PMID:18830407 | PMCID:PMC2553005	pubmed	18830407	create date:2008/10/03 | first author:Meyer DH				Not relevant
The information capacity of hypercycles.	/pubmed/18694761	Silvestre DA, Fontanari JF.	J Theor Biol. 2008 Oct 21;254(4):804-6. doi: 10.1016/j.jtbi.2008.07.023. Epub 2008 Jul 23.	J Theor Biol. 2008	PubMed	citation	PMID:18694761	pubmed	18694761	create date:2008/08/13 | first author:Silvestre DA				Not relevant
[Lesions of the mitochondrial genome and ways of its preservation].	/pubmed/18666547	Gaziev AI, Sha€_khaev GO.	Genetika. 2008 Apr;44(4):437-55. Review. Russian.	Genetika. 2008	PubMed	citation	PMID:18666547	pubmed	18666547	create date:2008/08/01 | first author:Gaziev AI				Russian
Diagnostic prevalence rates from early to mid-adolescence among indigenous adolescents: first results from a longitudinal study.	/pubmed/18596558	Whitbeck LB, Yu M, Johnson KD, Hoyt DR, Walls ML.	J Am Acad Child Adolesc Psychiatry. 2008 Aug;47(8):890-900. doi: 10.1097/CHI.0b013e3181799609.	J Am Acad Child Adolesc Psychiatry. 2008	PubMed	citation	PMID:18596558 | PMCID:PMC2643437	pubmed	18596558	create date:2008/07/04 | first author:Whitbeck LB				Not relevant
Package models and the information crisis of prebiotic evolution.	/pubmed/18358494	Silvestre DA, Fontanari JF.	J Theor Biol. 2008 May 21;252(2):326-37. doi: 10.1016/j.jtbi.2008.02.012. Epub 2008 Feb 16.	J Theor Biol. 2008	PubMed	citation	PMID:18358494	pubmed	18358494	create date:2008/03/25 | first author:Silvestre DA				Not relevant
Challenges in modern drug discovery: a case study of boceprevir, an HCV protease inhibitor for the treatment of hepatitis C virus infection.	/pubmed/18193821	Njoroge FG, Chen KX, Shih NY, Piwinski JJ.	Acc Chem Res. 2008 Jan;41(1):50-9. doi: 10.1021/ar700109k. Review.	Acc Chem Res. 2008	PubMed	citation	PMID:18193821	pubmed	18193821	create date:2008/01/16 | first author:Njoroge FG				Not relevant
Pharmacological intervention strategies for affecting telomerase activity: future prospects to treat cancer and degenerative disease.	/pubmed/17945408	TÌÁrkÌÁnyi I, Aradi J.	Biochimie. 2008 Jan;90(1):156-72. Epub 2007 Sep 11. Review.	Biochimie. 2008	PubMed	citation	PMID:17945408	pubmed	17945408	create date:2007/10/20 | first author:TÌÁrkÌÁnyi I				Not relevant
The status of nursing in the state of Delaware: a second look.	/pubmed/17718357	Smallwood PC, Thomassen SB, Watson CD.	Del Med J. 2007 Jul;79(7):279-88.	Del Med J. 2007	PubMed	citation	PMID:17718357	pubmed	17718357	create date:2007/08/28 | first author:Smallwood PC				Not relevant
Preservation of information in a prebiotic package model.	/pubmed/17677100	Silvestre DA, Fontanari JF.	Phys Rev E Stat Nonlin Soft Matter Phys. 2007 May;75(5 Pt 1):051909. Epub 2007 May 15.	Phys Rev E Stat Nonlin Soft Matter Phys. 2007	PubMed	citation	PMID:17677100	pubmed	17677100	create date:2007/08/07 | first author:Silvestre DA				Not relevant
Genomics of IncP-1 antibiotic resistance plasmids isolated from wastewater treatment plants provides evidence for a widely accessible drug resistance gene pool.	/pubmed/17553065	SchlÌ_ter A, Szczepanowski R, PÌ_hler A, Top EM.	FEMS Microbiol Rev. 2007 Jul;31(4):449-77. Epub 2007 Jun 6. Review.	FEMS Microbiol Rev. 2007	PubMed	citation	PMID:17553065	pubmed	17553065	create date:2007/06/08 | first author:SchlÌ_ter A				Not relevant
Severe human lower respiratory tract illness caused by respiratory syncytial virus and influenza virus is characterized by the absence of pulmonary cytotoxic lymphocyte responses.	/pubmed/17357048	Welliver TP, Garofalo RP, Hosakote Y, Hintz KH, Avendano L, Sanchez K, Velozo L, Jafri H, Chavez-Bueno S, Ogra PL, McKinney L, Reed JL, Welliver RC Sr.	J Infect Dis. 2007 Apr 15;195(8):1126-36. Epub 2007 Mar 9.	J Infect Dis. 2007	PubMed	citation	PMID:17357048	pubmed	17357048	create date:2007/03/16 | first author:Welliver TP				Not relevant
Last findings on dual inhibitors of abl and SRC tyrosine-kinases.	/pubmed/17305593	Schenone S, Manetti F, Botta M.	Mini Rev Med Chem. 2007 Feb;7(2):191-201. Review.	Mini Rev Med Chem. 2007	PubMed	citation	PMID:17305593	pubmed	17305593	create date:2007/02/20 | first author:Schenone S				Not relevant
HIV/AIDS epidemiology, pathogenesis, prevention, and treatment.	/pubmed/16890836	Simon V, Ho DD, Abdool Karim Q.	Lancet. 2006 Aug 5;368(9534):489-504. Review.	Lancet. 2006	PubMed	citation	PMID:16890836 | PMCID:PMC2913538	pubmed	16890836	create date:2006/08/08 | first author:Simon V				Not relevant
Enhanced expression and activity of DNA polymerase beta in chronic myelogenous leukemia.	/pubmed/16739313	Canitrot Y, Laurent G, Astarie-Dequeker C, Bordier C, Cazaux C, Hoffmann JS.	Anticancer Res. 2006 Jan-Feb;26(1B):523-5.	Anticancer Res. 2006	PubMed	citation	PMID:16739313	pubmed	16739313	create date:2006/06/03 | first author:Canitrot Y				Not relevant
Lymphoma cell apoptosis in the liver induced by distant murine cytomegalovirus infection.	/pubmed/16641273	Erlach KC, BÌ¦hm V, Seckert CK, Reddehase MJ, Podlech J.	J Virol. 2006 May;80(10):4801-19.	J Virol. 2006	PubMed	citation	PMID:16641273 | PMCID:PMC1472044	pubmed	16641273	create date:2006/04/28 | first author:Erlach KC				Not relevant
LMP-420, a small-molecule inhibitor of TNF-alpha, reduces replication of HIV-1 and Mycobacterium tuberculosis in human cells.	/pubmed/16573838	Haraguchi S, Day NK, Kamchaisatian W, Beigier-Pompadre M, Stenger S, Tangsinmankong N, Sleasman JW, Pizzo SV, Cianciolo GJ.	AIDS Res Ther. 2006 Mar 31;3:8.	AIDS Res Ther. 2006	PubMed	citation	PMID:16573838 | PMCID:PMC1448187	pubmed	16573838	create date:2006/04/01 | first author:Haraguchi S				Not relevant
Psychological therapies for people with borderline personality disorder.	/pubmed/16437534	Binks CA, Fenton M, McCarthy L, Lee T, Adams CE, Duggan C.	Cochrane Database Syst Rev. 2006 Jan 25;(1):CD005652. Review. Update in: Cochrane Database Syst Rev. 2012;8:CD005652.	Cochrane Database Syst Rev. 2006	PubMed	citation	PMID:16437534	pubmed	16437534	create date:2006/01/27 | first author:Binks CA				Not relevant
The distal zinc finger domain of AML1/MDS1/EVI1 is an oligomerization domain involved in induction of hematopoietic differentiation defects in primary cells in vitro.	/pubmed/16140925	Senyuk V, Li D, Zakharov A, Mikhail FM, Nucifora G.	Cancer Res. 2005 Sep 1;65(17):7603-11.	Cancer Res. 2005	PubMed	citation	PMID:16140925	pubmed	16140925	create date:2005/09/06 | first author:Senyuk V				Not relevant
Ability of the vector tick Boophilus microplus to acquire and transmit Babesia equi following feeding on chronically infected horses with low-level parasitemia.	/pubmed/16081906	Ueti MW, Palmer GH, Kappmeyer LS, Statdfield M, Scoles GA, Knowles DP.	J Clin Microbiol. 2005 Aug;43(8):3755-9.	J Clin Microbiol. 2005	PubMed	citation	PMID:16081906 | PMCID:PMC1233951	pubmed	16081906	create date:2005/08/06 | first author:Ueti MW				Not relevant
Acute reduction of an origin recognition complex (ORC) subunit in human cells reveals a requirement of ORC for Cdk2 activation.	/pubmed/15944161	Machida YJ, Teer JK, Dutta A.	J Biol Chem. 2005 Jul 29;280(30):27624-30. Epub 2005 Jun 7.	J Biol Chem. 2005	PubMed	citation	PMID:15944161	pubmed	15944161	create date:2005/06/10 | first author:Machida YJ				Not relevant
A 'principled' approach to complex emergencies: testing a new aid delivery model in the Nuba mountains.	/pubmed/15910677	Pantuliano S.	Disasters. 2005 Jun;29 Suppl 1:S52-66.	Disasters. 2005	PubMed	citation	PMID:15910677	pubmed	15910677	create date:2005/05/25 | first author:Pantuliano S				Not relevant
Effect of humanin on decreased ATP levels of human lymphocytes harboring A3243G mutant mitochondrial DNA.	/pubmed/15752543	Kariya S, Hirano M, Furiya Y, Ueno S.	Neuropeptides. 2005 Apr;39(2):97-101.	Neuropeptides. 2005	PubMed	citation	PMID:15752543	pubmed	15752543	create date:2005/03/09 | first author:Kariya S				Not relevant
Content and processes of postpartum counseling after a distressing birth experience: a review.	/pubmed/15330884	Gamble J, Creedy D.	Birth. 2004 Sep;31(3):213-8. Review.	Birth. 2004	PubMed	citation	PMID:15330884	pubmed	15330884	create date:2004/08/28 | first author:Gamble J				Not relevant
Telomere maintenance in clinical medicine.	/pubmed/15308436	Ulaner GA.	Am J Med. 2004 Aug 15;117(4):262-9. Review.	Am J Med. 2004	PubMed	citation	PMID:15308436	pubmed	15308436	create date:2004/08/17 | first author:Ulaner GA				Not relevant
Non-neutral role of replicative senescence in tissue homeostasis and tumorigenesis.	/pubmed/15302543	Poyatos JF, Carnero A.	J Theor Biol. 2004 Oct 7;230(3):333-41.	J Theor Biol. 2004	PubMed	citation	PMID:15302543	pubmed	15302543	create date:2004/08/11 | first author:Poyatos JF				Not relevant
Role of melatonin in carbon monoxide-induced hypoxemia.	/pubmed/15236789	Nicholls JC.	Med Hypotheses. 2004;63(2):274-6.	Med Hypotheses. 2004	PubMed	citation	PMID:15236789	pubmed	15236789	create date:2004/07/09 | first author:Nicholls JC				Not relevant
BCR/ABL translocates to the nucleus and disrupts an ATR-dependent intra-S phase checkpoint.	/pubmed/15050919	Dierov J, Dierova R, Carroll M.	Cancer Cell. 2004 Mar;5(3):275-85.	Cancer Cell. 2004	PubMed	citation	PMID:15050919	pubmed	15050919	create date:2004/03/31 | first author:Dierov J				Not relevant
Identifying progression-associated genes in adult T-cell leukemia/lymphoma by using oligonucleotide microarrays.	/pubmed/15027121	Tsukasaki K, Tanosaki S, DeVos S, Hofmann WK, Wachsman W, Gombart AF, Krebs J, Jauch A, Bartram CR, Nagai K, Tomonaga M, Said JW, Koeffler HP.	Int J Cancer. 2004 May 10;109(6):875-81.	Int J Cancer. 2004	PubMed	citation	PMID:15027121	pubmed	15027121	create date:2004/03/18 | first author:Tsukasaki K				Not relevant
Construction and sequencing of an infectious clone of the human parvovirus B19.	/pubmed/14972543	Zhi N, ZÌÁdori Z, Brown KE, Tijssen P.	Virology. 2004 Jan 5;318(1):142-52.	Virology. 2004	PubMed	citation	PMID:14972543	pubmed	14972543	create date:2004/02/20 | first author:Zhi N				Not relevant
HIV, sex, and social change: applying ESID principles to HIV prevention research.	/pubmed/14703268	FernÌÁndez MI, Bowen GS, Gay CL, Mattson TR, Bital E, Kelly JA.	Am J Community Psychol. 2003 Dec;32(3-4):333-44.	Am J Community Psychol. 2003	PubMed	citation	PMID:14703268	pubmed	14703268	create date:2004/01/02 | first author:FernÌÁndez MI				Not relevant
An in silico investigation into the causes of telomere length heterogeneity and its implications for the Hayflick limit.	/pubmed/14575650	Golubev A, Khrustalev S, Butov A.	J Theor Biol. 2003 Nov 21;225(2):153-70.	J Theor Biol. 2003	PubMed	citation	PMID:14575650	pubmed	14575650	create date:2003/10/25 | first author:Golubev A				Not relevant
Loss of retinoblastoma but not p16 function allows bypass of replicative senescence in human fibroblasts.	/pubmed/14566323	Wei W, Herbig U, Wei S, Dutriaux A, Sedivy JM.	EMBO Rep. 2003 Nov;4(11):1061-6. Epub 2003 Oct 17.	EMBO Rep. 2003	PubMed	citation	PMID:14566323 | PMCID:PMC1326371	pubmed	14566323	create date:2003/10/21 | first author:Wei W				Not relevant
Telomerase inhibition with an oligonucleotide telomerase template antagonist: in vitro and in vivo studies in multiple myeloma and lymphoma.	/pubmed/12969977	Wang ES, Wu K, Chin AC, Chen-Kiang S, Pongracz K, Gryaznov S, Moore MA.	Blood. 2004 Jan 1;103(1):258-66. Epub 2003 Sep 11.	Blood. 2004	PubMed	citation	PMID:12969977	pubmed	12969977	create date:2003/09/13 | first author:Wang ES				Not relevant
[The promoter effects of sodium butyrate on the malignant transformation of the immortalized esophageal epithelium induced by human papillomavirus].	/pubmed/12417090	Shen Z, Shen J, Cai W, Chen M, Wu X, Zheng R, Zeng Y.	Zhonghua Bing Li Xue Za Zhi. 2002 Aug;31(4):327-30. Chinese.	Zhonghua Bing Li Xue Za Zhi. 2002	PubMed	citation	PMID:12417090	pubmed	12417090	create date:2002/11/06 | first author:Shen Z				Chinese
Telomerase activation in cervical keratinocytes containing stably replicating human papillomavirus type 16 episomes.	/pubmed/12359427	Sprague DL, Phillips SL, Mitchell CJ, Berger KL, Lace M, Turek LP, Klingelhutz AJ.	Virology. 2002 Sep 30;301(2):247-54.	Virology. 2002	PubMed	citation	PMID:12359427	pubmed	12359427	create date:2002/10/03 | first author:Sprague DL				Not relevant
Protecting genomic integrity during DNA replication: correlation between Werner's and Bloom's syndrome gene products and the MRE11 complex.	/pubmed/12351580	Franchitto A, Pichierri P.	Hum Mol Genet. 2002 Oct 1;11(20):2447-53. Review.	Hum Mol Genet. 2002	PubMed	citation	PMID:12351580	pubmed	12351580	create date:2002/09/28 | first author:Franchitto A				Not relevant
Current molecular epidemiology and human parvovirus B19 infection.	/pubmed/12116847	Umene K, Nunoue T.	Pathol Biol (Paris). 2002 Jun;50(5):285-94. Review.	Pathol Biol (Paris). 2002	PubMed	citation	PMID:12116847	pubmed	12116847	create date:2002/07/16 | first author:Umene K				Not relevant
Current state of HIV/AIDS in Taiwan and reappraisal of early diagnostic value of serial and comparative analyses of western blot patterns of HIV infection.	/pubmed/11890112	Chen MY, Chuang CY.	Gan To Kagaku Ryoho. 2002 Feb;29 Suppl 1:39-46.	Gan To Kagaku Ryoho. 2002	PubMed	citation	PMID:11890112	pubmed	11890112	create date:2002/03/14 | first author:Chen MY				Not relevant
Termination of lifespan of SV40-transformed human fibroblasts in crisis is due to apoptosis.	/pubmed/11857449	Macera-Bloch L, Houghton J, Lenahan M, Jha KK, Ozer HL.	J Cell Physiol. 2002 Mar;190(3):332-44.	J Cell Physiol. 2002	PubMed	citation	PMID:11857449	pubmed	11857449	create date:2002/02/22 | first author:Macera-Bloch L				Not relevant
The temperature sensitive mutant p53-143ala extends in vitro life span, promotes errors in DNA replication and impairs DNA repair in normal human oral keratinocytes.	/pubmed/11838964	Liu X, Nishitani J, McQuirter JL, Baluda MA, Park NH.	Cell Mol Biol (Noisy-le-grand). 2001 Nov;47(7):1169-78.	Cell Mol Biol (Noisy-le-grand). 2001	PubMed	citation	PMID:11838964	pubmed	11838964	create date:2002/02/13 | first author:Liu X				Not relevant
Multistage carcinogenesis in cell culture.	/pubmed/11761268	Rubin H.	Dev Biol (Basel). 2001;106:61-6; discussion 67, 143-60.	Dev Biol (Basel). 2001	PubMed	citation	PMID:11761268	pubmed	11761268	create date:2002/01/05 | first author:Rubin H				Not relevant
The basic reality of mind and spongiform diseases.	/pubmed/11735309	Axelsson S.	Med Hypotheses. 2001 Nov;57(5):549-54.	Med Hypotheses. 2001	PubMed	citation	PMID:11735309	pubmed	11735309	create date:2001/12/12 | first author:Axelsson S				Not relevant
Direct relation between BCR-ABL tyrosine kinase activity and cyclin D2 expression in lymphoblasts.	/pubmed/11691826	Deininger MW, Vieira SA, Parada Y, Banerji L, Lam EW, Peters G, Mahon FX, KÌ¦hler T, Goldman JM, Melo JV.	Cancer Res. 2001 Nov 1;61(21):8005-13.	Cancer Res. 2001	PubMed	citation	PMID:11691826	pubmed	11691826	create date:2001/11/03 | first author:Deininger MW				Not relevant
Progenitor cells from patients with advanced phase chronic myeloid leukaemia respond to STI571 in vitro and in vivo.	/pubmed/11597734	Marley SB, Davidson RJ, Lewis JL, Nguyen DX, Eades A, Parker S, Goldman JM, Gordon MY.	Leuk Res. 2001 Nov;25(11):997-1002.	Leuk Res. 2001	PubMed	citation	PMID:11597734	pubmed	11597734	create date:2001/10/13 | first author:Marley SB				Not relevant
Telomere dynamics and genetic instability in disease progression of chronic myeloid leukemia.	/pubmed/11426628	Ohyashiki K, Iwama H, Tauchi T, Shimamoto T, Hayashi S, Ando K, Kawakubo K, Ohyashiki JH.	Leuk Lymphoma. 2000 Dec;40(1-2):49-56. Review.	Leuk Lymphoma. 2000	PubMed	citation	PMID:11426628	pubmed	11426628	create date:2001/06/28 | first author:Ohyashiki K				Not relevant
Replication checkpoint: preventing mitotic catastrophe.	/pubmed/11250164	Canman CE.	Curr Biol. 2001 Feb 20;11(4):R121-4. Review.	Curr Biol. 2001	PubMed	citation	PMID:11250164	pubmed	11250164	create date:2001/03/16 | first author:Canman CE				Not relevant
The Assaulted Staff Action Program (ASAP) and declines in the prevalence of assaults: community-based replication.	/pubmed/11227749	Flannery RB Jr, Penk WE, Corrigan M.	Int J Emerg Ment Health. 1999 Winter;1(1):19-21.	Int J Emerg Ment Health. 1999	PubMed	citation	PMID:11227749	pubmed	11227749	create date:2001/03/03 | first author:Flannery RB Jr				Not relevant
Old and new targets of antibacterial therapy.	/pubmed/11214186	Dbaibo GS.	J Med Liban. 2000 Jul-Aug;48(4):177-81. Review.	J Med Liban. 2000	PubMed	citation	PMID:11214186	pubmed	11214186	create date:2001/02/24 | first author:Dbaibo GS				Not relevant
Telomerase and human tumorigenesis.	/pubmed/11170862	Stewart SA, Weinberg RA.	Semin Cancer Biol. 2000 Dec;10(6):399-406. Review.	Semin Cancer Biol. 2000	PubMed	citation	PMID:11170862	pubmed	11170862	create date:2001/02/15 | first author:Stewart SA				Not relevant
Chronic fatigue syndrome: an examination of the phases.	/pubmed/11132566	Jason LA, Fricano G, Taylor RR, Halpert J, Fennell PA, Klein S, Levine S.	J Clin Psychol. 2000 Dec;56(12):1497-508.	J Clin Psychol. 2000	PubMed	citation	PMID:11132566	pubmed	11132566	create date:2001/01/02 | first author:Jason LA				Not relevant
Crisis periods and apoptotic commitment: death imprints?	/pubmed/11032969	Sit KH.	Curr Med Chem. 2000 Dec;7(12):1247-54.	Curr Med Chem. 2000	PubMed	citation	PMID:11032969	pubmed	11032969	create date:2000/10/18 | first author:Sit KH				Not relevant
Uncoupling between phenotypic senescence and cell cycle arrest in aging p21-deficient fibroblasts.	/pubmed/10958672	Duli€à V, Beney GE, Frebourg G, Drullinger LF, Stein GH.	Mol Cell Biol. 2000 Sep;20(18):6741-54.	Mol Cell Biol. 2000	PubMed	citation	PMID:10958672 | PMCID:PMC86196	pubmed	10958672	create date:2000/08/25 | first author:Duli€à V				Not relevant
Haematological consequences of parvovirus B19 infection.	/pubmed/10942624	Brown KE.	Baillieres Best Pract Res Clin Haematol. 2000 Jun;13(2):245-59. Review.	Baillieres Best Pract Res Clin Haematol. 2000	PubMed	citation	PMID:10942624	pubmed	10942624	create date:2000/08/16 | first author:Brown KE				Not relevant
The Assaulted Staff Action Program (ASAP) and declines in rates of assault: mixed replicated findings.	/pubmed/10832158	Flannery RB Jr, Anderson E, Marks L, Uzoma LL.	Psychiatr Q. 2000 Summer;71(2):165-75.	Psychiatr Q. 2000	PubMed	citation	PMID:10832158	pubmed	10832158	create date:2000/06/01 | first author:Flannery RB Jr				Not relevant
Prognostic implications of differences in telomere length between normal and malignant cells from patients with chronic myeloid leukemia measured by flow cytometry.	/pubmed/10706851	BrÌ_mmendorf TH, Holyoake TL, Rufer N, Barnett MJ, Schulzer M, Eaves CJ, Eaves AC, Lansdorp PM.	Blood. 2000 Mar 15;95(6):1883-90.	Blood. 2000	PubMed	citation	PMID:10706851	pubmed	10706851	create date:2000/03/09 | first author:BrÌ_mmendorf TH				Not relevant
Telomere, telomerase, tumorigenesis and therapy: an overview.	/pubmed/10687276	Sen S, Dasgupta A, Roychudhuri A, Mittra B, Majumder HK.	Indian J Exp Biol. 1999 Sep;37(9):839-42. Review.	Indian J Exp Biol. 1999	PubMed	citation	PMID:10687276	pubmed	10687276	create date:2000/02/25 | first author:Sen S				Not relevant
Differentiation between senescence (M1) and crisis (M2) in human fibroblast cultures.	/pubmed/10585275	Wei W, Sedivy JM.	Exp Cell Res. 1999 Dec 15;253(2):519-22.	Exp Cell Res. 1999	PubMed	citation	PMID:10585275	pubmed	10585275	create date:1999/12/10 | first author:Wei W				Not relevant
Replicating Project LINC in two midwestern states. Implications for policy development.	/pubmed/10446557	Westmoreland D, Grigsby K, Brown L, Latessa P, Huber D.	Nurs Health Care Perspect. 1998 Jul-Aug;19(4):166-74.	Nurs Health Care Perspect. 1998	PubMed	citation	PMID:10446557	pubmed	10446557	create date:1999/08/14 | first author:Westmoreland D				Not relevant
Meningiomas, dicentric chromosomes, gliomas, and telomerase activity.	/pubmed/10440750	Carroll T, Maltby E, Brock I, Royds J, Timperley W, Jellinek D.	J Pathol. 1999 Aug;188(4):395-9.	J Pathol. 1999	PubMed	citation	PMID:10440750	pubmed	10440750	create date:1999/08/10 | first author:Carroll T				Not relevant
Human parvovirus B19: relevance in internal medicine.	/pubmed/10399450	van Elsacker-Niele AM, Kroes AC.	Neth J Med. 1999 Jun;54(6):221-30. Review.	Neth J Med. 1999	PubMed	citation	PMID:10399450	pubmed	10399450	create date:1999/07/10 | first author:van Elsacker-Niele AM				Not relevant
The TGF-beta type II receptor in chronic myeloid leukemia: analysis of microsatellite regions and gene expression.	/pubmed/10214859	Rooke HM, Vitas MR, Crosier PS, Crosier KE.	Leukemia. 1999 Apr;13(4):535-41.	Leukemia. 1999	PubMed	citation	PMID:10214859	pubmed	10214859	create date:1999/04/24 | first author:Rooke HM				Not relevant
Crisis intervention: the role of telomerase.	/pubmed/10097039	Lustig AJ.	Proc Natl Acad Sci U S A. 1999 Mar 30;96(7):3339-41. Review. No abstract available.	Proc Natl Acad Sci U S A. 1999	PubMed	citation	PMID:10097039 | PMCID:PMC34270	pubmed	10097039	create date:1999/03/31 | first author:Lustig AJ				Not relevant
Latent infection and reactivation of human herpesvirus 6 in two novel myeloid cell lines.	/pubmed/9920848	Yasukawa M, Ohminami H, Sada E, Yakushijin Y, Kaneko M, Yanagisawa K, Kohno H, Bando S, Fujita S.	Blood. 1999 Feb 1;93(3):991-9.	Blood. 1999	PubMed	citation	PMID:9920848	pubmed	9920848	create date:1999/01/28 | first author:Yasukawa M				Not relevant
Effect of ethanol on chromatin and nonhistone nuclear proteins in rat brain.	/pubmed/9712188	Mahadev K, Vemuri MC.	Neurochem Res. 1998 Sep;23(9):1179-84.	Neurochem Res. 1998	PubMed	citation	PMID:9712188	pubmed	9712188	create date:1998/08/26 | first author:Mahadev K				Not relevant
Leukemic cells with 11q23 translocations express granulocyte colony-stimulating factor (G-CSF) receptor and their proliferation is stimulated with G-CSF.	/pubmed/9529133	Inukai T, Sugita K, Iijima K, Goi K, Tezuka T, Kojika S, Kagami K, Mori T, Kinoshita A, Suzuki T, O-Koyama T, Nakazawa S.	Leukemia. 1998 Mar;12(3):382-9.	Leukemia. 1998	PubMed	citation	PMID:9529133	pubmed	9529133	create date:1998/04/07 | first author:Inukai T				Not relevant
Telomere DNA sequences and the concept of ontogenetic reserve cells.	/pubmed/9467852	Spitkovsky DM.	Biochemistry (Mosc). 1997 Nov;62(11):1285-90. Review.	Biochemistry (Mosc). 1997	PubMed	citation	PMID:9467852	pubmed	9467852	create date:1998/02/19 | first author:Spitkovsky DM				Not relevant
Telomeres, senescence and cellular radiation response.	/pubmed/9284959	Crompton NE.	Cell Mol Life Sci. 1997 Jul;53(7):568-75. Review.	Cell Mol Life Sci. 1997	PubMed	citation	PMID:9284959	pubmed	9284959	create date:1997/07/01 | first author:Crompton NE				Not relevant
Cell cycle checkpoints: preventing an identity crisis.	/pubmed/8939848	Elledge SJ.	Science. 1996 Dec 6;274(5293):1664-72. Review.	Science. 1996	PubMed	citation	PMID:8939848	pubmed	8939848	create date:1996/12/06 | first author:Elledge SJ				Not relevant
[Telomere and telomerase].	/pubmed/9183660	Ishikawa F.	Hum Cell. 1996 Dec;9(4):287-94. Review. Japanese.	Hum Cell. 1996	PubMed	citation	PMID:9183660	pubmed	9183660	create date:1996/12/01 | first author:Ishikawa F				Japanese
[The virus of human immunodeficiency: virological characteristics, natural history and physiopathology of the nervous system infection].	/pubmed/9064180	Vidal-LampurdanÌ©s C, Pumarola-SuÌ±Ì© T.	Rev Neurol. 1996 Dec;24(136):1563-8. Review. Spanish.	Rev Neurol. 1996	PubMed	citation	PMID:9064180	pubmed	9064180	create date:1996/12/01 | first author:Vidal-LampurdanÌ©s C				Spanish
Accuracy of immunohistochemistry and flow cytometry in estimating the proportion of leukemic cells in S phase in chronic myeloid leukemia patients.	/pubmed/8882956	Hegde U, Kotelnikov VM, Handa H, Burke P, Preisler HD.	Leuk Lymphoma. 1996 Aug;22(5-6):431-7.	Leuk Lymphoma. 1996	PubMed	citation	PMID:8882956	pubmed	8882956	create date:1996/08/01 | first author:Hegde U				Not relevant
Activation-dependent alpha5beta1 integrin-mediated adhesion to fibronectin decreases proliferation of chronic myelogenous leukemia progenitors and K562 cells.	/pubmed/8630410	Lundell BI, McCarthy JB, Kovach NL, Verfaillie CM.	Blood. 1996 Mar 15;87(6):2450-8.	Blood. 1996	PubMed	citation	PMID:8630410	pubmed	8630410	create date:1996/03/15 | first author:Lundell BI				Not relevant
[Suppression of granulopoiesis by vesnarinone].	/pubmed/8725353	Chen G.	Kokubyo Gakkai Zasshi. 1996 Mar;63(1):8-17. Japanese.	Kokubyo Gakkai Zasshi. 1996	PubMed	citation	PMID:8725353	pubmed	8725353	create date:1996/03/01 | first author:Chen G				Japanese
The study of AgNOR proteins in leukemias: diagnostic value and correlation to S-phase cell fraction.	/pubmed/8996564	KlobusickÌÁ M, BabusÌ_kovÌÁ O, MesÌÁrosovÌÁ A, Kusenda J, GlasovÌÁ M.	Neoplasma. 1996;43(6):397-401.	Neoplasma. 1996	PubMed	citation	PMID:8996564	pubmed	8996564	create date:1996/01/01 | first author:KlobusickÌÁ M				Not relevant
[Blast differentiation in a patient with chronic myeloid leukemia in blast crisis using retinoic acid].	/pubmed/8850236	Burgaleta C, Villalba S, Ferro MT.	Sangre (Barc). 1995 Dec;40(6):509-12. Spanish.	Sangre (Barc). 1995	PubMed	citation	PMID:8850236	pubmed	8850236	create date:1995/12/01 | first author:Burgaleta C				Spanish
New pathogens, and diseases old and new. I) Afipia felis and Rochalimaea. II) Parvovirus B 19. III) herpesvirus 6.	/pubmed/8710408	Zannolli R, Morgese G.	Panminerva Med. 1995 Dec;37(4):238-47. Review.	Panminerva Med. 1995	PubMed	citation	PMID:8710408	pubmed	8710408	create date:1995/12/01 | first author:Zannolli R				Not relevant
Epithelial cell specific properties and genetic complementation in a delta F508 cystic fibrosis nasal polyp cell line.	/pubmed/8528517	Kunzelmann K, Lei DC, Eng K, Escobar LC, Koslowsky T, Gruenert DC.	In Vitro Cell Dev Biol Anim. 1995 Sep;31(8):617-24.	In Vitro Cell Dev Biol Anim. 1995	PubMed	citation	PMID:8528517	pubmed	8528517	create date:1995/09/01 | first author:Kunzelmann K				Not relevant
Immortalisation of human oesophageal epithelial cells by a recombinant SV40 adenovirus vector.	/pubmed/7536023	Inokuchi S, Handa H, Imai T, Makuuchi H, Kidokoro M, Tohya H, Aizawa S, Shimamura K, Ueyama Y, Mitomi T, et al.	Br J Cancer. 1995 Apr;71(4):819-25.	Br J Cancer. 1995	PubMed	citation	PMID:7536023 | PMCID:PMC2033740	pubmed	7536023	create date:1995/04/01 | first author:Inokuchi S				Not relevant
A quail long-term cell culture transformed by a chimeric jun oncogene.	/pubmed/7871748	Hartl M, Vogt PK, Bister K.	Virology. 1995 Feb 20;207(1):321-6.	Virology. 1995	PubMed	citation	PMID:7871748	pubmed	7871748	create date:1995/02/20 | first author:Hartl M				Not relevant
The international political economy of food: a global crisis.	/pubmed/7591379	Friedmann H.	Int J Health Serv. 1995;25(3):511-38. Review.	Int J Health Serv. 1995	PubMed	citation	PMID:7591379	pubmed	7591379	create date:1995/01/01 | first author:Friedmann H				Not relevant
[Ways of finding inhibitors of HIV reproduction among nucleotides].	/pubmed/7885326	Kraevski€_ AA.	Mol Biol (Mosk). 1994 Nov-Dec;28(6):1245-57. Review. Russian.	Mol Biol (Mosk). 1994	PubMed	citation	PMID:7885326	pubmed	7885326	create date:1994/11/01 | first author:Kraevski€_ AA				Russian
Genomic instability of microsatellite repeats and its association with the evolution of chronic myelogenous leukemia.	/pubmed/8204873	Wada C, Shionoya S, Fujino Y, Tokuhiro H, Akahoshi T, Uchida T, Ohtani H.	Blood. 1994 Jun 15;83(12):3449-56.	Blood. 1994	PubMed	citation	PMID:8204873	pubmed	8204873	create date:1994/06/15 | first author:Wada C				Not relevant
Flow cytometric detection of proliferative cells in leukemias.	/pubmed/8144401	Wakita A, Nitta M, Mitomo Y, Takahashi M, Tanaka M, Kaneda T.	Jpn J Cancer Res. 1994 Feb;85(2):204-10.	Jpn J Cancer Res. 1994	PubMed	citation	PMID:8144401	pubmed	8144401	create date:1994/02/01 | first author:Wakita A				Not relevant
Epithelioid and fibroblastic cell lines derived from the ileum of an adult histocompatible miniature boar (d/d haplotype) and immortalized by SV40 plasmid.	/pubmed/8269973	Kaeffer B, Bottreau E, Velge P, Pardon P.	Eur J Cell Biol. 1993 Oct;62(1):152-62.	Eur J Cell Biol. 1993	PubMed	citation	PMID:8269973	pubmed	8269973	create date:1993/10/01 | first author:Kaeffer B				Not relevant
Escape from in vitro aging in SV40 large T antigen-transformed human diploid cells: a key event responsible for immortalization occurs during crisis.	/pubmed/8397328	Imai S, Saito F, Ikeuchi T, Segawa K, Takano T.	Mech Ageing Dev. 1993 Jun;69(1-2):149-58.	Mech Ageing Dev. 1993	PubMed	citation	PMID:8397328	pubmed	8397328	create date:1993/06/01 | first author:Imai S				Not relevant
Persistent infection of human erythroblastoid cells by poliovirus.	/pubmed/8386873	Lloyd RE, Bovee M.	Virology. 1993 May;194(1):200-9.	Virology. 1993	PubMed	citation	PMID:8386873	pubmed	8386873	create date:1993/05/01 | first author:Lloyd RE				Not relevant
An immortalized cystic fibrosis tracheal epithelial cell line homozygous for the delta F508 CFTR mutation.	/pubmed/7683197	Kunzelmann K, Schwiebert EM, Zeitlin PL, Kuo WL, Stanton BA, Gruenert DC.	Am J Respir Cell Mol Biol. 1993 May;8(5):522-9.	Am J Respir Cell Mol Biol. 1993	PubMed	citation	PMID:7683197	pubmed	7683197	create date:1993/05/01 | first author:Kunzelmann K				Not relevant
Partial nucleotide sequencing and characterization of human parvovirus B19 genome DNAs from damaged human fetuses and from patients with leukemia.	/pubmed/8492104	Umene K, Nunoue T.	J Med Virol. 1993 Apr;39(4):333-9.	J Med Virol. 1993	PubMed	citation	PMID:8492104	pubmed	8492104	create date:1993/04/01 | first author:Umene K				Not relevant
DNA replication of parvovirus B 19 in a human erythroid leukemia cell line (JK-1) in vitro.	/pubmed/8328914	Takahashi T, Ozawa K, Takahashi K, Okuno Y, Takahashi T, Muto Y, Takaku F, Asano S.	Arch Virol. 1993;131(1-2):201-8.	Arch Virol. 1993	PubMed	citation	PMID:8328914	pubmed	8328914	create date:1993/01/01 | first author:Takahashi T				Not relevant
Cellular senescence.	/pubmed/1418911	Koli K, Keski-Oja J.	Ann Med. 1992 Oct;24(5):313-8. Review.	Ann Med. 1992	PubMed	citation	PMID:1418911	pubmed	1418911	create date:1992/10/01 | first author:Koli K				Not relevant
Involvement of tumor necrosis factor (TNF) receptors p55 and p75 in TNF responses of acute myeloid leukemia blasts in vitro.	/pubmed/1382704	Delwel R, van Buitenen C, LÌ¦wenberg B, Touw I.	Blood. 1992 Oct 1;80(7):1798-803.	Blood. 1992	PubMed	citation	PMID:1382704	pubmed	1382704	create date:1992/10/01 | first author:Delwel R				Not relevant
Telomere shortening associated with chromosome instability is arrested in immortal cells which express telomerase activity.	/pubmed/1582420	Counter CM, Avilion AA, LeFeuvre CE, Stewart NG, Greider CW, Harley CB, Bacchetti S.	EMBO J. 1992 May;11(5):1921-9.	EMBO J. 1992	PubMed	citation	PMID:1582420 | PMCID:PMC556651	pubmed	1582420	create date:1992/05/01 | first author:Counter CM				Not relevant
Inhibition of acute myelogenous leukemia blast proliferation by interleukin-1 (IL-1) receptor antagonist and soluble IL-1 receptors.	/pubmed/1373331	Estrov Z, Kurzrock R, Estey E, Wetzler M, Ferrajoli A, Harris D, Blake M, Gutterman JU, Talpaz M.	Blood. 1992 Apr 15;79(8):1938-45.	Blood. 1992	PubMed	citation	PMID:1373331	pubmed	1373331	create date:1992/04/15 | first author:Estrov Z				Not relevant
Granulocyte-macrophage colony-stimulating factor and interleukin-3 enhance the incorporation of cytosine arabinoside into the DNA of leukemic blasts and the cytotoxic effect on clonogenic cells from patients with acute myeloid leukemia.	/pubmed/1553573	Hiddemann W, Kiehl M, ZÌ_hlsdorf M, Busemann C, Schleyer E, WÌ¦rmann B, BÌ_chner T.	Semin Oncol. 1992 Apr;19(2 Suppl 4):31-7.	Semin Oncol. 1992	PubMed	citation	PMID:1553573	pubmed	1553573	create date:1992/04/01 | first author:Hiddemann W				Not relevant
Alterations of DNA content in human endometrial stromal cells transfected with a temperature-sensitive SV40: tetraploidization and physiological consequences.	/pubmed/1310263	Rinehart CA, Mayben JP, Butler TD, Haskill JS, Kaufman DG.	Carcinogenesis. 1992 Jan;13(1):63-8.	Carcinogenesis. 1992	PubMed	citation	PMID:1310263	pubmed	1310263	create date:1992/01/01 | first author:Rinehart CA				Not relevant
Acute lymphoblastic leukemia blast cells do not inhibit bone marrow hematopoietic progenitor colony formation.	/pubmed/1995313	Estrov Z, Freedman MH.	Exp Hematol. 1991 Mar;19(3):221-5.	Exp Hematol. 1991	PubMed	citation	PMID:1995313	pubmed	1995313	create date:1991/03/01 | first author:Estrov Z				Not relevant
Expression of SV40 large T antigen, but not small t antigen, is required for the induction of chromosomal aberrations in transformed human cells.	/pubmed/1845837	Stewart N, Bacchetti S.	Virology. 1991 Jan;180(1):49-57.	Virology. 1991	PubMed	citation	PMID:1845837	pubmed	1845837	create date:1991/01/01 | first author:Stewart N				Not relevant
Persistent B19 parvovirus infection in patients infected with human immunodeficiency virus type 1 (HIV-1): a treatable cause of anemia in AIDS.	/pubmed/2173460	Frickhofen N, Abkowitz JL, Safford M, Berry JM, Antunez-de-Mayolo J, Astrow A, Cohen R, Halperin I, King L, Mintzer D, et al.	Ann Intern Med. 1990 Dec 15;113(12):926-33.	Ann Intern Med. 1990	PubMed	citation	PMID:2173460	pubmed	2173460	create date:1990/12/15 | first author:Frickhofen N				Not relevant
Cell growth in chronic myeloid leukemia at blast crisis.	/pubmed/2285242	Papaphilis AD.	Anticancer Res. 1990 Nov-Dec;10(6):1677-81.	Anticancer Res. 1990	PubMed	citation	PMID:2285242	pubmed	2285242	create date:1990/11/01 | first author:Papaphilis AD				Not relevant
Cellular immortalization--an essential step or merely a risk factor in DNA virus-induced transformation?	/pubmed/2282252	Strauss M, Griffin BE.	Cancer Cells. 1990 Nov;2(11):360-5.	Cancer Cells. 1990	PubMed	citation	PMID:2282252	pubmed	2282252	create date:1990/11/01 | first author:Strauss M				Not relevant
Effect of thimerosal in leukemia, in leukemic cell lines, and on normal hematopoiesis.	/pubmed/2364396	Panella TJ, Huang AT.	Cancer Res. 1990 Jul 15;50(14):4429-35.	Cancer Res. 1990	PubMed	citation	PMID:2364396	pubmed	2364396	create date:1990/07/15 | first author:Panella TJ				Not relevant
Susceptibility of human erythropoietic cells to B19 parvovirus in vitro increases with differentiation.	/pubmed/2404522	Takahashi T, Ozawa K, Takahashi K, Asano S, Takaku F.	Blood. 1990 Feb 1;75(3):603-10.	Blood. 1990	PubMed	citation	PMID:2404522	pubmed	2404522	create date:1990/02/01 | first author:Takahashi T				Not relevant
SV40 T antigen alone drives karyotype instability that precedes neoplastic transformation of human diploid fibroblasts.	/pubmed/2153691	Ray FA, Peabody DS, Cooper JL, Cram LS, Kraemer PM.	J Cell Biochem. 1990 Jan;42(1):13-31.	J Cell Biochem. 1990	PubMed	citation	PMID:2153691	pubmed	2153691	create date:1990/01/01 | first author:Ray FA				Not relevant
Invasion of mature and immature erythrocytes of CBA/Ca mice by a cloned line of Plasmodium chabaudi chabaudi.	/pubmed/2594410	Jarra W, Brown KN.	Parasitology. 1989 Oct;99 Pt 2:157-63.	Parasitology. 1989	PubMed	citation	PMID:2594410	pubmed	2594410	create date:1989/10/01 | first author:Jarra W				Not relevant
[Parvovirus infections in humans].	/pubmed/2548517	Fleites E, RamÌ_rez-Ronda CH.	Bol Asoc Med P R. 1989 Aug;81(8):300-7. Review. Spanish.	Bol Asoc Med P R. 1989	PubMed	citation	PMID:2548517	pubmed	2548517	create date:1989/08/01 | first author:Fleites E				Spanish
A collaborative project: initiating a family intervention program in a medical intensive care unit.	/pubmed/2737344	Cray L.	Focus Crit Care. 1989 Jun;16(3):213-8.	Focus Crit Care. 1989	PubMed	citation	PMID:2737344	pubmed	2737344	create date:1989/06/01 | first author:Cray L				Not relevant
TGF beta inhibits Go/S-phase transition in primary fibroblasts. Loss of response to the antigrowth effect of TGF beta is observed after immortalization.	/pubmed/2498805	Sorrentino V, Bandyopadhyay S.	Oncogene. 1989 May;4(5):569-74.	Oncogene. 1989	PubMed	citation	PMID:2498805	pubmed	2498805	create date:1989/05/01 | first author:Sorrentino V				Not relevant
Aplastic crisis caused by B19 virus in a child during induction therapy for acute lymphoblastic leukemia.	/pubmed/2545576	Azzi A, Macchia PA, Favre C, Nardi M, Zakrzewska K, Corsi OB.	Haematologica. 1989 Mar-Apr;74(2):191-4.	Haematologica. 1989	PubMed	citation	PMID:2545576	pubmed	2545576	create date:1989/03/01 | first author:Azzi A				Not relevant
Isolation and characterization of HeLa cell lines blocked at different steps in the poliovirus life cycle.	/pubmed/2535745	Kaplan G, Levy A, Racaniello VR.	J Virol. 1989 Jan;63(1):43-51.	J Virol. 1989	PubMed	citation	PMID:2535745 | PMCID:PMC247655	pubmed	2535745	create date:1989/01/01 | first author:Kaplan G				Not relevant
Blitz rape and confidence rape: a typology applied to 1,000 consecutive cases.	/pubmed/3189605	Silverman DC, Kalick SM, Bowie SI, Edbril SD.	Am J Psychiatry. 1988 Nov;145(11):1438-41.	Am J Psychiatry. 1988	PubMed	citation	PMID:3189605	pubmed	3189605	create date:1988/11/01 | first author:Silverman DC				Not relevant
Effects of admission to a nursing unit.	/pubmed/2980629	Pearson A, Durand I, Punton S.	Aust J Adv Nurs. 1988 Sep-Nov;6(1):38-42.	Aust J Adv Nurs. 1988	PubMed	citation	PMID:2980629	pubmed	2980629	create date:1988/09/01 | first author:Pearson A				Not relevant
Characterization of human tracheal epithelial cells transformed by an origin-defective simian virus 40.	/pubmed/2457904	Gruenert DC, Basbaum CB, Welsh MJ, Li M, Finkbeiner WE, Nadel JA.	Proc Natl Acad Sci U S A. 1988 Aug;85(16):5951-5.	Proc Natl Acad Sci U S A. 1988	PubMed	citation	PMID:2457904 | PMCID:PMC281883	pubmed	2457904	create date:1988/08/01 | first author:Gruenert DC				Not relevant
A failed replication.	/pubmed/3402931	Harris M, Bergman HC.	Hosp Community Psychiatry. 1988 Jun;39(6):670. No abstract available.	Hosp Community Psychiatry. 1988	PubMed	citation	PMID:3402931	pubmed	3402931	create date:1988/06/01 | first author:Harris M				Unaccessible
B19 parvovirus replicates in circulating cells of acutely infected patients.	/pubmed/2833960	Kurtzman GJ, Gascon P, Caras M, Cohen B, Young NS.	Blood. 1988 May;71(5):1448-54.	Blood. 1988	PubMed	citation	PMID:2833960	pubmed	2833960	create date:1988/05/01 | first author:Kurtzman GJ				Not relevant
Characterization of mutant human fibroblast cultures transformed with simian virus 40.	/pubmed/2848852	Miranda AF, Duigou GJ, Hernandez E, Fisher PB.	J Cell Sci. 1988 Apr;89 ( Pt 4):481-93.	J Cell Sci. 1988	PubMed	citation	PMID:2848852	pubmed	2848852	create date:1988/04/01 | first author:Miranda AF				Not relevant
Productive infection by B19 parvovirus of human erythroid bone marrow cells in vitro.	/pubmed/3038211	Ozawa K, Kurtzman G, Young N.	Blood. 1987 Aug;70(2):384-91.	Blood. 1987	PubMed	citation	PMID:3038211	pubmed	3038211	create date:1987/08/01 | first author:Ozawa K				Not relevant
Human parvovirus infections.	/pubmed/2822752	Anderson MJ.	J Virol Methods. 1987 Aug;17(1-2):175-81. Review.	J Virol Methods. 1987	PubMed	citation	PMID:2822752	pubmed	2822752	create date:1987/08/01 | first author:Anderson MJ				Not relevant
Effects of methotrexate and of the "nonclassical" folate antagonist trimetrexate on human leukemia cells.	/pubmed/2959824	Rodenhuis S, McGuire JJ, Sawicki WL, Bertino JR.	Leukemia. 1987 Feb;1(2):116-20.	Leukemia. 1987	PubMed	citation	PMID:2959824	pubmed	2959824	create date:1987/02/01 | first author:Rodenhuis S				Not relevant
Evolution of in vitro persistence of two strains of canine parainfluenza virus. Brief report.	/pubmed/3028342	BaumgÌ_rtner W, Krakowka S, Blakeslee J.	Arch Virol. 1987;93(1-2):147-54.	Arch Virol. 1987	PubMed	citation	PMID:3028342	pubmed	3028342	create date:1987/01/01 | first author:BaumgÌ_rtner W				Not relevant
Socialization and situational influences on sustained altruism.	/pubmed/3802966	Clary EG, Miller J.	Child Dev. 1986 Dec;57(6):1358-69.	Child Dev. 1986	PubMed	citation	PMID:3802966	pubmed	3802966	create date:1986/12/01 | first author:Clary EG				Not relevant
Program characteristics for successful treatment of adolescent drug abuse.	/pubmed/3772356	Friedman AS, Glickman NW.	J Nerv Ment Dis. 1986 Nov;174(11):669-79.	J Nerv Ment Dis. 1986	PubMed	citation	PMID:3772356	pubmed	3772356	create date:1986/11/01 | first author:Friedman AS				Not relevant
A new approach to the evolution of the blastic crisis from chronic myelocytic leukemia: dynamic interplay of cellular alterations and a changing microenvironment.	/pubmed/3458586	Grossman Z.	EMBO J. 1986 Apr;5(4):671-7.	EMBO J. 1986	PubMed	citation	PMID:3458586 | PMCID:PMC1166843	pubmed	3458586	create date:1986/04/01 | first author:Grossman Z				Not relevant
Crisis decision making in coronary care: a replication study.	/pubmed/3635041	Bourbonnais FF, Baumann A.	Nurs Pap. 1986 Winter;17(4):4-19. No abstract available.	Nurs Pap. 1986	PubMed	citation	PMID:3635041	pubmed	3635041	create date:1986/01/01 | first author:Bourbonnais FF				Not relevant
Latent infection of human ovarian teratocarcinoma cells with human cytomegalovirus. Brief report.	/pubmed/3019280	Kamiya S, Tanaka J, Ogura T, Sato H, Ogura H, Nakamura S, Hatano M.	Arch Virol. 1986;91(1-2):175-81.	Arch Virol. 1986	PubMed	citation	PMID:3019280	pubmed	3019280	create date:1986/01/01 | first author:Kamiya S				Not relevant
Establishment and characterization of a permanent pSV ori--transformed ataxia-telangiectasia cell line.	/pubmed/2987007	Murnane JP, Fuller LF, Painter RB.	Exp Cell Res. 1985 May;158(1):119-26.	Exp Cell Res. 1985	PubMed	citation	PMID:2987007	pubmed	2987007	create date:1985/05/01 | first author:Murnane JP				Not relevant
Establishment and characterization of a persistent infection of MDBK cells with herpes simplex virus.	/pubmed/2409431	Mannini-Palenzona A, Bartoletti AM, Foa'-Tomasi L, Baserga M, Tognon M, Manservigi R.	Microbiologica. 1985 Apr;8(2):165-80.	Microbiologica. 1985	PubMed	citation	PMID:2409431	pubmed	2409431	create date:1985/04/01 | first author:Mannini-Palenzona A				Not relevant
Formation of a host range mutant of the lymphotropic strain of minute virus of mice during persistent infection in mouse L cells.	/pubmed/6090711	Ron D, Tattersall P, Tal J.	J Virol. 1984 Oct;52(1):63-9.	J Virol. 1984	PubMed	citation	PMID:6090711 | PMCID:PMC254489	pubmed	6090711	create date:1984/10/01 | first author:Ron D				Not relevant
Persistent infection with mouse hepatitis virus 3 in mouse lymphoid cell lines.	/pubmed/6327531	Lamontagne LM, Dupuy JM.	Infect Immun. 1984 Jun;44(3):716-23.	Infect Immun. 1984	PubMed	citation	PMID:6327531 | PMCID:PMC263677	pubmed	6327531	create date:1984/06/01 | first author:Lamontagne LM				Not relevant
Medical Malpractice Arbitration Act: Michigan's experience with arbitration.	/pubmed/6534188	Bedikian M.	Am J Law Med. 1984 Fall;10(3):287-306.	Am J Law Med. 1984	PubMed	citation	PMID:6534188	pubmed	6534188	create date:1984/01/01 | first author:Bedikian M				Not relevant
Characterization of the genome of the agent of erythrocyte aplasia permits its classification as a human parvovirus.	/pubmed/6315871	Summers J, Jones SE, Anderson MJ.	J Gen Virol. 1983 Nov;64 (Pt 11):2527-32.	J Gen Virol. 1983	PubMed	citation	PMID:6315871	pubmed	6315871	create date:1983/11/01 | first author:Summers J				Not relevant
Transformation and immortalization of human keratinocytes by SV40.	/pubmed/6306114	Steinberg ML, Defendi V.	J Invest Dermatol. 1983 Jul;81(1 Suppl):131s-6s.	J Invest Dermatol. 1983	PubMed	citation	PMID:6306114	pubmed	6306114	create date:1983/07/01 | first author:Steinberg ML				Not relevant
The crisis of rape: a community response.	/pubmed/6681273	Underwood MM, Fiedler N.	Community Ment Health J. 1983 Fall;19(3):227-30.	Community Ment Health J. 1983	PubMed	citation	PMID:6681273	pubmed	6681273	create date:1983/01/01 | first author:Underwood MM				Not relevant
Carcinogen-transformed human cells are inhibited from entry into S phase by fusion to senescent cells but cells transformed by DNA tumor viruses overcome the inhibition.	/pubmed/6957863	Stein GH, Yanishevsky RM, Gordon L, Beeson M.	Proc Natl Acad Sci U S A. 1982 Sep;79(17):5287-91.	Proc Natl Acad Sci U S A. 1982	PubMed	citation	PMID:6957863 | PMCID:PMC346881	pubmed	6957863	create date:1982/09/01 | first author:Stein GH				Not relevant
Characterization of herpes simplex virus persistence in a human T lymphoblastoid cell line.	/pubmed/6174451	Cummings PJ, Lakomy RJ, Rinaldo CR Jr.	Infect Immun. 1981 Dec;34(3):817-27.	Infect Immun. 1981	PubMed	citation	PMID:6174451 | PMCID:PMC350943	pubmed	6174451	create date:1981/12/01 | first author:Cummings PJ				Not relevant
Defective interfering influenza viruses and host cells: establishment and maintenance of persistent influenza virus infection in MDBK and HeLa cells.	/pubmed/7463559	De BK, Nayak DP.	J Virol. 1980 Dec;36(3):847-59.	J Virol. 1980	PubMed	citation	PMID:7463559 | PMCID:PMC353712	pubmed	7463559	create date:1980/12/01 | first author:De BK				Not relevant
Fiscal crisis in a therapeutic community.	/pubmed/7450945	Tolbert C.	Int J Addict. 1980 Oct;15(7):1011-9.	Int J Addict. 1980	PubMed	citation	PMID:7450945	pubmed	7450945	create date:1980/10/01 | first author:Tolbert C				Not relevant
Inactive normal X in a female leukaemic patient with an acquired X/autosome translocation.	/pubmed/287653	Dallapiccola B, Alimena G.	Hum Genet. 1979 Apr 27;48(2):169-77.	Hum Genet. 1979	PubMed	citation	PMID:287653	pubmed	287653	create date:1979/04/27 | first author:Dallapiccola B				Not relevant
Fifteen years after treatment: a follow-up study of comprehensive vocationally-oriented psychotherapy.	/pubmed/434118	Shore MF, Massimo JL.	Am J Orthopsychiatry. 1979 Apr;49(2):240-5.	Am J Orthopsychiatry. 1979	PubMed	citation	PMID:434118	pubmed	434118	create date:1979/04/01 | first author:Shore MF				Not relevant
Simian virus 40 (SV40) production from SV40-transformed human amnion cells of established lines.	/pubmed/204798	Fogh J, Loveless J.	J Natl Cancer Inst. 1978 Apr;60(4):895-8.	J Natl Cancer Inst. 1978	PubMed	citation	PMID:204798	pubmed	204798	create date:1978/04/01 | first author:Fogh J				Not relevant
The prediction of "shows" and "no-shows" to a crisis center: a replication.	/pubmed/1202945	Walfish S, Tapp JT, Tulkin SR, Slaikeu K, Russell M.	Am J Community Psychol. 1975 Dec;3(4):367-70.	Am J Community Psychol. 1975	PubMed	citation	PMID:1202945	pubmed	1202945	create date:1975/12/01 | first author:Walfish S				Not relevant
Duplication of the Y chromosome during myeloblastic crisis of chronic myelocytic leukemia.	/pubmed/5304612	Anderson JW, Pearson G, Valdmanis A, Mann JD.	Ann Genet. 1968 Sep;11(3):135-7. No abstract available.	Ann Genet. 1968	PubMed	citation	PMID:5304612	pubmed	5304612	create date:1968/09/01 | first author:Anderson JW				Not relevant

## Sheet: 2) Reproducibility crisis
"Reproducibility crisis"		2017-11-03
Title	URL	Description	Details	ShortDetails	Resource	Type	Identifiers	Db	EntrezUID	Properties				Comment
Ethical and Legal Implications of the Methodological Crisis in Neuroimaging.	/pubmed/28937337	Kellmeyer P.	Camb Q Healthc Ethics. 2017 Oct;26(4):530-554. doi: 10.1017/S096318011700007X.	Camb Q Healthc Ethics. 2017	PubMed	citation	PMID:28937337	pubmed	28937337	create date:2017/09/25 | first author:Kellmeyer P
[Statistics at the time of the crisis].	/pubmed/28929711	Saltelli A, Stark PB.	Epidemiol Prev. 2017 May-Aug;41(3-4):165-169. doi: 10.19191/EP17.3-4.P165.048. Italian.	Epidemiol Prev. 2017	PubMed	citation	PMID:28929711	pubmed	28929711	create date:2017/09/21 | first author:Saltelli A
Reliability of EEG Measures of Interaction: A Paradigm Shift Is Needed to Fight the Reproducibility Crisis.	/pubmed/28912704	HÌ¦ller Y, Uhl A, Bathke A, Thomschewski A, Butz K, Nardone R, Fell J, Trinka E.	Front Hum Neurosci. 2017 Aug 30;11:441. doi: 10.3389/fnhum.2017.00441. eCollection 2017.	Front Hum Neurosci. 2017	PubMed	citation	PMID:28912704 | PMCID:PMC5582168	pubmed	28912704	create date:2017/09/16 | first author:HÌ¦ller Y
The science reproducibility crisis and the necessity to publish negative results.	/pubmed/28890235	GonzÌÁlez MartÌ_n-Moro J.	Arch Soc Esp Oftalmol. 2017 Sep 7. pii: S0365-6691(17)30253-8. doi: 10.1016/j.oftal.2017.07.009. [Epub ahead of print] English, Spanish. No abstract available.	Arch Soc Esp Oftalmol. 2017	PubMed	citation	PMID:28890235	pubmed	28890235	create date:2017/09/12 | first author:GonzÌÁlez MartÌ_n-Moro J
Moving Forward: Challenges and Directions for Psychopathological Network Theory and Methodology.	/pubmed/28873325	Fried EI, Cramer AOJ.	Perspect Psychol Sci. 2017 Aug 1:1745691617705892. doi: 10.1177/1745691617705892. [Epub ahead of print]	Perspect Psychol Sci. 2017	PubMed	citation	PMID:28873325	pubmed	28873325	create date:2017/09/06 | first author:Fried EI
Why statistical inference from clinical trials is likely to generate false and irreproducible results.	/pubmed/28830371	Hanin L.	BMC Med Res Methodol. 2017 Aug 22;17(1):127. doi: 10.1186/s12874-017-0399-0.	BMC Med Res Methodol. 2017	PubMed	citation	PMID:28830371 | PMCID:PMC5568363	pubmed	28830371	create date:2017/08/24 | first author:Hanin L
The reproducibility "crisis": Reaction to replication crisis should not stifle innovation.	/pubmed/28794201	Hunter P.	EMBO Rep. 2017 Sep;18(9):1493-1496. doi: 10.15252/embr.201744876. Epub 2017 Aug 9. No abstract available.	EMBO Rep. 2017	PubMed	citation	PMID:28794201 | PMCID:PMC5579390	pubmed	28794201	create date:2017/08/11 | first author:Hunter P
Participant NonnaivetÌ© and the reproducibility of cognitive psychology.	/pubmed/28744765	Zwaan RA, Pecher D, Paolacci G, Bouwmeester S, Verkoeijen P, Dijkstra K, Zeelenberg R.	Psychon Bull Rev. 2017 Jul 25. doi: 10.3758/s13423-017-1348-y. [Epub ahead of print]	Psychon Bull Rev. 2017	PubMed	citation	PMID:28744765	pubmed	28744765	create date:2017/07/27 | first author:Zwaan RA
Sepsis reconsidered: Identifying novel metrics for behavioral landscape characterization with a high-performance computing implementation of an agent-based model.	/pubmed/28728997	Cockrell C, An G.	J Theor Biol. 2017 Oct 7;430:157-168. doi: 10.1016/j.jtbi.2017.07.016. Epub 2017 Jul 18.	J Theor Biol. 2017	PubMed	citation	PMID:28728997 | PMCID:PMC5635265	pubmed	28728997	create date:2017/07/22 | first author:Cockrell C
The ABCs of finding a good antibody: How to find a good antibody, validate it, and publish meaningful data.	/pubmed/28713558	Acharya P, Quinlan A, Neumeister V.	F1000Res. 2017 Jun 8;6:851. doi: 10.12688/f1000research.11774.1. eCollection 2017.	F1000Res. 2017	PubMed	citation	PMID:28713558 | PMCID:PMC5499787	pubmed	28713558	create date:2017/07/18 | first author:Acharya P
Investigating reproducibility and tracking provenance - A genomic workflow case study.	/pubmed/28701218	Kanwal S, Khan FZ, Lonie A, Sinnott RO.	BMC Bioinformatics. 2017 Jul 12;18(1):337. doi: 10.1186/s12859-017-1747-0.	BMC Bioinformatics. 2017	PubMed	citation	PMID:28701218 | PMCID:PMC5508699	pubmed	28701218	create date:2017/07/14 | first author:Kanwal S
The earth is flat (påÊ>åÊ0.05): significance thresholds and the crisis of unreplicable research.	/pubmed/28698825	Amrhein V, Korner-Nievergelt F, Roth T.	PeerJ. 2017 Jul 7;5:e3544. doi: 10.7717/peerj.3544. eCollection 2017.	PeerJ. 2017	PubMed	citation	PMID:28698825 | PMCID:PMC5502092	pubmed	28698825	create date:2017/07/13 | first author:Amrhein V
Commentary: Reproducibility in Psychological Science: When Do Psychological Phenomena Exist?	/pubmed/28690559	Heino MTJ, Fried EI, LeBel EP.	Front Psychol. 2017 Jun 22;8:1004. doi: 10.3389/fpsyg.2017.01004. eCollection 2017. No abstract available.	Front Psychol. 2017	PubMed	citation	PMID:28690559 | PMCID:PMC5479906	pubmed	28690559	create date:2017/07/12 | first author:Heino MTJ
Errors in data interpretation from genetic variation of human analytes.	/pubmed/28679954	Howie HL, Delaney M, Wang X, Er LS, Kapp L, Lebedev JN, Zimring JC.	JCI Insight. 2017 Jul 6;2(13). pii: 94532. doi: 10.1172/jci.insight.94532. [Epub ahead of print]	JCI Insight. 2017	PubMed	citation	PMID:28679954 | PMCID:PMC5499359	pubmed	28679954	create date:2017/07/07 | first author:Howie HL
Validity evidence of non-technical skills assessment instruments in simulated anaesthesia crisis management.	/pubmed/28673217	Jirativanont T, Raksamani K, Aroonpruksakul N, Apidechakul P, Suraseranivongse S.	Anaesth Intensive Care. 2017 Jul;45(4):469-475.	Anaesth Intensive Care. 2017	PubMed	citation	PMID:28673217	pubmed	28673217	create date:2017/07/05 | first author:Jirativanont T
Simulation-based Assessment of the Management of Critical Events by Board-certified Anesthesiologists.	/pubmed/28671903	Weinger MB, Banerjee A, Burden AR, McIvor WR, Boulet J, Cooper JB, Steadman R, Shotwell MS, Slagle JM, DeMaria S Jr, Torsher L, Sinz E, Levine AI, Rask J, Davis F, Park C, Gaba DM.	Anesthesiology. 2017 Sep;127(3):475-489. doi: 10.1097/ALN.0000000000001739.	Anesthesiology. 2017	PubMed	citation	PMID:28671903	pubmed	28671903	create date:2017/07/04 | first author:Weinger MB
Translational pain assessment: could natural animal models be the missing link?	/pubmed/28614187	Klinck MP, Mogil JS, Moreau M, Lascelles BDX, Flecknell PA, Poitte T, Troncy E.	Pain. 2017 Sep;158(9):1633-1646. doi: 10.1097/j.pain.0000000000000978.	Pain. 2017	PubMed	citation	PMID:28614187	pubmed	28614187	create date:2017/06/15 | first author:Klinck MP
Big Data, Small Sample.	/pubmed/28599385	Gerlovina I, van der Laan MJ, Hubbard A.	Int J Biostat. 2017 May 20;13(1). pii: /j/ijb.2017.13.issue-1/ijb-2017-0012/ijb-2017-0012.xml. doi: 10.1515/ijb-2017-0012.	Int J Biostat. 2017	PubMed	citation	PMID:28599385	pubmed	28599385	create date:2017/06/11 | first author:Gerlovina I
A critical evaluation of the current "p-value controversy".	/pubmed/28504870	Wellek S.	Biom J. 2017 Sep;59(5):854-872. doi: 10.1002/bimj.201700001. Epub 2017 May 15. Review.	Biom J. 2017	PubMed	citation	PMID:28504870	pubmed	28504870	create date:2017/05/16 | first author:Wellek S
Challenging Authority During an Emergency-the Effect of a Teaching Intervention.	/pubmed/28471813	Friedman Z, Perelman V, McLuckie D, Andrews M, Noble LMK, Malavade A, Bould MD.	Crit Care Med. 2017 Aug;45(8):e814-e820. doi: 10.1097/CCM.0000000000002450.	Crit Care Med. 2017	PubMed	citation	PMID:28471813	pubmed	28471813	create date:2017/05/05 | first author:Friedman Z
The credibility crisis in research: Can economics tools help?	/pubmed/28445470	Gall T, Ioannidis JPA, Maniadis Z.	PLoS Biol. 2017 Apr 26;15(4):e2001846. doi: 10.1371/journal.pbio.2001846. eCollection 2017 Apr. Review.	PLoS Biol. 2017	PubMed	citation	PMID:28445470 | PMCID:PMC5405914	pubmed	28445470	create date:2017/04/27 | first author:Gall T
The challenges with the validation of research antibodies.	/pubmed/28357047	Voskuil JL.	F1000Res. 2017 Feb 17;6:161. doi: 10.12688/f1000research.10851.1. eCollection 2017.	F1000Res. 2017	PubMed	citation	PMID:28357047 | PMCID:PMC5333605	pubmed	28357047	create date:2017/03/31 | first author:Voskuil JL
Introducing Therioepistemology: the study of how knowledge is gained from animal research.	/pubmed/28328885	Garner JP, Gaskill BN, Weber EM, Ahloy-Dallaire J, Pritchett-Corning KR.	Lab Anim (NY). 2017 Mar 22;46(4):103-113. doi: 10.1038/laban.1224. Review.	Lab Anim (NY). 2017	PubMed	citation	PMID:28328885	pubmed	28328885	create date:2017/03/23 | first author:Garner JP
A patient called Medical Research.	/pubmed/28323292	Furst T, Strojil J.	Biomed Pap Med Fac Univ Palacky Olomouc Czech Repub. 2017 Mar;161(1):54-57. doi: 10.5507/bp.2017.005. Epub 2017 Mar 14. Review.	Biomed Pap Med Fac Univ Palacky Olomouc Czech Repub. 2017	PubMed	citation	PMID:28323292	pubmed	28323292	create date:2017/03/23 | first author:Furst T
Omics"-Informed Drug and Biomarker Discovery: Opportunities, Challenges and Future Perspectives.	/pubmed/28248238	Matthews H, Hanison J, Nirmalan N.	Proteomes. 2016 Sep 12;4(3). pii: E28. doi: 10.3390/proteomes4030028. Review.	Proteomes. 2016	PubMed	citation	PMID:28248238 | PMCID:PMC5217350	pubmed	28248238	create date:2017/03/02 | first author:Matthews H
Female fecundity variation affects reproducibility of experiments on host plant preference and acceptance in a phytophagous insect.	/pubmed/28202813	SchÌ_pers A, PetrÌ©n H, Wheat CW, Wiklund C, Friberg M.	Proc Biol Sci. 2017 Feb 22;284(1849). pii: 20162643. doi: 10.1098/rspb.2016.2643.	Proc Biol Sci. 2017	PubMed	citation	PMID:28202813 | PMCID:PMC5326532	pubmed	28202813	create date:2017/02/17 | first author:SchÌ_pers A
Patent Law's Reproducibility Paradox.	/pubmed/28117563	Sherkow JS.	Duke Law J. 2017 Jan;66(4):845-911.	Duke Law J. 2017	PubMed	citation	PMID:28117563	pubmed	28117563	create date:2017/01/25 | first author:Sherkow JS
Unobtrusive and Wearable Systems for Automatic Dietary Monitoring.	/pubmed/28092510	Prioleau T, Moore Ii E, Ghovanloo M.	IEEE Trans Biomed Eng. 2017 Sep;64(9):2075-2089. doi: 10.1109/TBME.2016.2631246. Epub 2017 Jan 16. Review.	IEEE Trans Biomed Eng. 2017	PubMed	citation	PMID:28092510	pubmed	28092510	create date:2017/01/17 | first author:Prioleau T
Robust planning of sanitation services in urban informal settlements: An analytical framework.	/pubmed/28038416	Schmitt RJ, Morgenroth E, Larsen TA.	Water Res. 2017 Mar 1;110:297-312. doi: 10.1016/j.watres.2016.12.007. Epub 2016 Dec 11.	Water Res. 2017	PubMed	citation	PMID:28038416	pubmed	28038416	create date:2016/12/31 | first author:Schmitt RJ
[Reliability of biomedical research.]	/pubmed/27997004	Andreoletti M.	Recenti Prog Med. 2016 Dec;107(12):622-627. doi: 10.1701/2502.26226. Italian.	Recenti Prog Med. 2016	PubMed	citation	PMID:27997004	pubmed	27997004	create date:2016/12/21 | first author:Andreoletti M
Development of a measure of model fidelity for mental health Crisis Resolution Teams.	/pubmed/27905909	Lloyd-Evans B, Bond GR, Ruud T, Ivanecka A, Gray R, Osborn D, Nolan F, Henderson C, Mason O, Goater N, Kelly K, Ambler G, Morant N, Onyett S, Lamb D, Fahmy S, Brown E, Paterson B, Sweeney A, Hindle D, Fullarton K, Frerichs J, et al.	BMC Psychiatry. 2016 Dec 1;16(1):427. doi: 10.1186/s12888-016-1139-4.	BMC Psychiatry. 2016	PubMed	citation	PMID:27905909 | PMCID:PMC5133753	pubmed	27905909	create date:2016/12/03 | first author:Lloyd-Evans B
EMPOWERING MULTI-COHORT GENE EXPRESSION ANALYSIS TO INCREASE REPRODUCIBILITY.	/pubmed/27896970	Haynes WA, Vallania F, Liu C, Bongen E, Tomczak A, Andres-TerrÌ¬ M, Lofgren S, Tam A, Deisseroth CA, Li MD, Sweeney TE, Khatri P.	Pac Symp Biocomput. 2017;22:144-153. doi: 10.1142/9789813207813_0015.	Pac Symp Biocomput. 2017	PubMed	citation	PMID:27896970 | PMCID:PMC5167529	pubmed	27896970	create date:2016/11/30 | first author:Haynes WA
Persistent threats to validity in single-group interrupted time series analysis with a cross over design.	/pubmed/27804216	Linden A.	J Eval Clin Pract. 2017 Apr;23(2):419-425. doi: 10.1111/jep.12668. Epub 2016 Nov 1.	J Eval Clin Pract. 2017	PubMed	citation	PMID:27804216	pubmed	27804216	create date:2016/11/03 | first author:Linden A
The impact of fraudulent and irreproducible data to the translational research crisis - solutions and implementation.	/pubmed/27797406	Schulz JB, Cookson MR, Hausmann L.	J Neurochem. 2016 Oct;139 Suppl 2:253-270. doi: 10.1111/jnc.13844. Review.	J Neurochem. 2016	PubMed	citation	PMID:27797406	pubmed	27797406	create date:2016/11/01 | first author:Schulz JB
The next step in translational research: lessons learned from the first preclinical randomized controlled trial.	/pubmed/26968835	Llovera G, Liesz A.	J Neurochem. 2016 Oct;139 Suppl 2:271-279. doi: 10.1111/jnc.13516. Epub 2016 Mar 10. Review.	J Neurochem. 2016	PubMed	citation	PMID:26968835	pubmed	26968835	create date:2016/11/01 | first author:Llovera G
[On-site detection of bioterrorism-relevant agents : Rapid detection methods for viruses, bacteria and toxins - capabilities and limitations].	/pubmed/27778086	Stern D, Richter M, Schrick L, Lasch P, Keeren K, Polleichtner A, Lemmer K, Nitsche A, Grunow R, Herzog C, Dorner BG, Schaade L.	Bundesgesundheitsblatt Gesundheitsforschung Gesundheitsschutz. 2016 Dec;59(12):1577-1586. Review. German.	Bundesgesundheitsblatt Gesundheitsforschung Gesundheitsschutz. 2016	PubMed	citation	PMID:27778086	pubmed	27778086	create date:2016/10/26 | first author:Stern D
A 13-year time trend analysis of 3724 small bowel video capsule endoscopies and a forecast model during the financial crisis in Greece.	/pubmed/27775952	Triantafyllou K, Gkolfakis P, Viazis N, Tsibouris P, Tsigaridas A, Apostolopoulos P, Anastasiou J, Hounda E, Skianis I, Katopodi K, Ndini X, Alexandrakis G, Karamanolis DG.	Eur J Gastroenterol Hepatol. 2017 Feb;29(2):185-191. doi: 10.1097/MEG.0000000000000771.	Eur J Gastroenterol Hepatol. 2017	PubMed	citation	PMID:27775952	pubmed	27775952	create date:2016/10/25 | first author:Triantafyllou K
Never Waste a Good Crisis: Confronting Reproducibility in Translational Research.	/pubmed/27626191	Drucker DJ.	Cell Metab. 2016 Sep 13;24(3):348-360. doi: 10.1016/j.cmet.2016.08.006.	Cell Metab. 2016	PubMed	citation	PMID:27626191	pubmed	27626191	create date:2016/09/15 | first author:Drucker DJ
Toxicology and the reproducibility crisis: Scientific publishing, hazard assessment and risk characterization.	/pubmed/27609564	Dekant W.	Toxicol Lett. 2016 Nov 30;263:76-77. doi: 10.1016/j.toxlet.2016.09.001. Epub 2016 Sep 5. No abstract available.	Toxicol Lett. 2016	PubMed	citation	PMID:27609564	pubmed	27609564	create date:2016/09/10 | first author:Dekant W
Venerable brain-cancer cell line faces identity crisis.	/pubmed/27604929	Dolgin E.	Nature. 2016 Sep 8;537(7619):149-50. doi: 10.1038/nature.2016.20515. No abstract available.	Nature. 2016	PubMed	citation	PMID:27604929	pubmed	27604929	create date:2016/09/09 | first author:Dolgin E
Multiscale approaches to crowd dynamics and the reliability of data from experiments: Comment on "Human behaviours in evacuation crowd dynamics: From modelling to "big data" toward crisis management" by Nicola Bellomo et al.	/pubmed/27555446	Piccoli B.	Phys Life Rev. 2016 Sep;18:46-47. doi: 10.1016/j.plrev.2016.08.003. Epub 2016 Aug 12. No abstract available.	Phys Life Rev. 2016	PubMed	citation	PMID:27555446	pubmed	27555446	create date:2016/08/25 | first author:Piccoli B
The reproducibility issue and preclinical academic drug discovery: educational and institutional initiatives fostering translation success.	/pubmed/27401809	Janero DR.	Expert Opin Drug Discov. 2016 Sep;11(9):835-42. doi: 10.1080/17460441.2016.1212014. Epub 2016 Jul 25. Review.	Expert Opin Drug Discov. 2016	PubMed	citation	PMID:27401809	pubmed	27401809	create date:2016/07/13 | first author:Janero DR
A Practical Guide for Improving Transparency and Reproducibility in Neuroimaging Research.	/pubmed/27389358	Gorgolewski KJ, Poldrack RA.	PLoS Biol. 2016 Jul 7;14(7):e1002506. doi: 10.1371/journal.pbio.1002506. eCollection 2016 Jul.	PLoS Biol. 2016	PubMed	citation	PMID:27389358 | PMCID:PMC4936733	pubmed	27389358	create date:2016/07/09 | first author:Gorgolewski KJ
Beyond p-values in the evaluation of brain-computer interfaces: A Bayesian estimation approach.	/pubmed/27317498	Melinscak F, Montesano L.	J Neurosci Methods. 2016 Sep 1;270:30-45. doi: 10.1016/j.jneumeth.2016.06.008. Epub 2016 Jun 15.	J Neurosci Methods. 2016	PubMed	citation	PMID:27317498	pubmed	27317498	create date:2016/06/19 | first author:Melinscak F
Heparin centenary - an ever-young life-saving drug.	/pubmed/27264864	Torri G, Naggi A.	Int J Cardiol. 2016 Jun;212 Suppl 1:S1-4. doi: 10.1016/S0167-5273(16)12001-7.	Int J Cardiol. 2016	PubMed	citation	PMID:27264864	pubmed	27264864	create date:2016/06/07 | first author:Torri G
Psychology, replication & beyond.	/pubmed/27251381	Laws KR.	BMC Psychol. 2016 Jun 1;4(1):30. doi: 10.1186/s40359-016-0135-2.	BMC Psychol. 2016	PubMed	citation	PMID:27251381 | PMCID:PMC4888260	pubmed	27251381	create date:2016/06/03 | first author:Laws KR
Reproducibility Crisis: Are We Ignoring Reaction Norms?	/pubmed/27211784	Voelkl B, WÌ_rbel H.	Trends Pharmacol Sci. 2016 Jul;37(7):509-10. doi: 10.1016/j.tips.2016.05.003. Epub 2016 May 20. No abstract available.	Trends Pharmacol Sci. 2016	PubMed	citation	PMID:27211784	pubmed	27211784	create date:2016/05/24 | first author:Voelkl B
Assessing the stochastic variability of the Benefit-Cost ratio in roadway safety management.	/pubmed/27208591	Cafiso S, D'Agostino C.	Accid Anal Prev. 2016 Aug;93:189-97. doi: 10.1016/j.aap.2016.04.027. Epub 2016 May 19.	Accid Anal Prev. 2016	PubMed	citation	PMID:27208591	pubmed	27208591	create date:2016/05/22 | first author:Cafiso S
The Experiment Factory: Standardizing Behavioral Experiments.	/pubmed/27199843	Sochat VV, Eisenberg IW, Enkavi AZ, Li J, Bissett PG, Poldrack RA.	Front Psychol. 2016 Apr 26;7:610. doi: 10.3389/fpsyg.2016.00610. eCollection 2016.	Front Psychol. 2016	PubMed	citation	PMID:27199843 | PMCID:PMC4844768	pubmed	27199843	create date:2016/05/21 | first author:Sochat VV
A Toolbox for Quantitative Gene Expression in Varroa destructor: RNA Degradation in Field Samples and Systematic Analysis of Reference Gene Stability.	/pubmed/27182699	Campbell EM, McIntosh CH, Bowman AS.	PLoS One. 2016 May 16;11(5):e0155640. doi: 10.1371/journal.pone.0155640. eCollection 2016.	PLoS One. 2016	PubMed	citation	PMID:27182699 | PMCID:PMC4868281	pubmed	27182699	create date:2016/05/18 | first author:Campbell EM
A mechanistic evaluation of the Syrian hamster embryo cell transformation assay (pH 6.7) and molecular events leading to senescence bypass in SHE cells.	/pubmed/27169376	Pickles JC, Pant K, Mcginty LA, Yasaei H, Roberts T, Scott AD, Newbold RF.	Mutat Res Genet Toxicol Environ Mutagen. 2016 May;802:50-8. doi: 10.1016/j.mrgentox.2016.04.002. Epub 2016 Apr 9.	Mutat Res Genet Toxicol Environ Mutagen. 2016	PubMed	citation	PMID:27169376 | PMCID:PMC4877681	pubmed	27169376	create date:2016/05/14 | first author:Pickles JC
The Galaxy platform for accessible, reproducible and collaborative biomedical analyses: 2016 update.	/pubmed/27137889	Afgan E, Baker D, van den Beek M, Blankenberg D, Bouvier D, €Îech M, Chilton J, Clements D, Coraor N, Eberhard C, GrÌ_ning B, Guerler A, Hillman-Jackson J, Von Kuster G, Rasche E, Soranzo N, Turaga N, Taylor J, Nekrutenko A, Goecks J.	Nucleic Acids Res. 2016 Jul 8;44(W1):W3-W10. doi: 10.1093/nar/gkw343. Epub 2016 May 2.	Nucleic Acids Res. 2016	PubMed	citation	PMID:27137889 | PMCID:PMC4987906	pubmed	27137889	create date:2016/05/04 | first author:Afgan E
[Measurement of unemployment-related psychological stress: Validation of the Unemployment Stress (USS)].	/pubmed/27091921	SzabÌ_nÌ© KapuvÌÁri V, Martos T.	Psychiatr Hung. 2016;31(1):30-9. Hungarian.	Psychiatr Hung. 2016	PubMed	citation	PMID:27091921	pubmed	27091921	create date:2016/04/20 | first author:SzabÌ_nÌ© KapuvÌÁri V
[Current seroprevalence, vaccination and predictive value of liver enzymes for hepatitis B among refugees in Germany].	/pubmed/27090247	Hampel A, Solbach P, Cornberg M, Schmidt RE, Behrens GM, Jablonka A.	Bundesgesundheitsblatt Gesundheitsforschung Gesundheitsschutz. 2016 May;59(5):578-83. doi: 10.1007/s00103-016-2333-8. German.	Bundesgesundheitsblatt Gesundheitsforschung Gesundheitsschutz. 2016	PubMed	citation	PMID:27090247	pubmed	27090247	create date:2016/04/20 | first author:Hampel A
Quality Issues of Research Antibodies.	/pubmed/27013861	Weller MG.	Anal Chem Insights. 2016 Mar 20;11:21-7. doi: 10.4137/ACI.S31614. eCollection 2016. Review.	Anal Chem Insights. 2016	PubMed	citation	PMID:27013861 | PMCID:PMC4803150	pubmed	27013861	create date:2016/03/26 | first author:Weller MG
The Problem of False Discovery: Many Scientific Results Can't Be Replicated, Leading to Serious Questions about What's True and False in the World of Research.	/pubmed/26978851	Foster KR, Skufca J.	IEEE Pulse. 2016 Mar-Apr;7(2):37-40. doi: 10.1109/MPUL.2015.2513726.	IEEE Pulse. 2016	PubMed	citation	PMID:26978851	pubmed	26978851	create date:2016/03/16 | first author:Foster KR
Simulation Testing for Selection of Critical Care Medicine Trainees. A Pilot Feasibility Study.	/pubmed/26967948	Cocciante AG, Nguyen MN, Marane CF, Panayiotou AE, Karahalios A, Beer JA, Johal N, Morris J, Turner S, Hessian EC.	Ann Am Thorac Soc. 2016 Apr;13(4):529-35. doi: 10.1513/AnnalsATS.201601-012OC.	Ann Am Thorac Soc. 2016	PubMed	citation	PMID:26967948	pubmed	26967948	create date:2016/03/12 | first author:Cocciante AG
Authentication of experimental materials: A remedy for the reproducibility crisis?	/pubmed/26900588	Li F, Hu J, Xie K, He TC.	Genes Dis. 2015 Dec;2(4):283. Epub 2015 Jul 7. No abstract available.	Genes Dis. 2015	PubMed	citation	PMID:26900588 | PMCID:PMC4758512	pubmed	26900588	create date:2016/02/24 | first author:Li F
When Quality Beats Quantity: Decision Theory, Drug Discovery, and the Reproducibility Crisis.	/pubmed/26863229	Scannell JW, Bosley J.	PLoS One. 2016 Feb 10;11(2):e0147215. doi: 10.1371/journal.pone.0147215. eCollection 2016.	PLoS One. 2016	PubMed	citation	PMID:26863229 | PMCID:PMC4749240	pubmed	26863229	create date:2016/02/11 | first author:Scannell JW
Validity and reliability of a novel Color-Risk Psychiatric Triage in a psychiatric emergency department.	/pubmed/26860593	Molina-LÌ_pez A, Cruz-Islas JB, Palma-CortÌ©s M, Guizar-SÌÁnchez DP, Garfias-Rau CY, Ontiveros-Uribe MP, FresÌÁn-Orellana A.	BMC Psychiatry. 2016 Feb 10;16:30. doi: 10.1186/s12888-016-0727-7.	BMC Psychiatry. 2016	PubMed	citation	PMID:26860593 | PMCID:PMC4748451	pubmed	26860593	create date:2016/02/11 | first author:Molina-LÌ_pez A
How to avoid pitfalls in antibody use.	/pubmed/26834988	Pauly D, Hanack K.	F1000Res. 2015 Sep 7;4:691. doi: 10.12688/f1000research.6894.1. eCollection 2015.	F1000Res. 2015	PubMed	citation	PMID:26834988 | PMCID:PMC4722690	pubmed	26834988	create date:2016/02/03 | first author:Pauly D
L-Arginine ethylester enhances in vitro amplification of PrP(Sc) in macaques with atypical L-type bovine spongiform encephalopathy and enables presymptomatic detection of PrP(Sc) in the bodily fluids.	/pubmed/26802462	Murayama Y, Ono F, Shimozaki N, Shibata H.	Biochem Biophys Res Commun. 2016 Feb 12;470(3):563-568. doi: 10.1016/j.bbrc.2016.01.105. Epub 2016 Jan 21.	Biochem Biophys Res Commun. 2016	PubMed	citation	PMID:26802462	pubmed	26802462	create date:2016/01/24 | first author:Murayama Y
The Internal Reliability of Family Crisis Oriented Personal Evaluation Scale (F-COPES) in Malay version among caregivers of individual with learning disabilities.	/pubmed/26794817	Alwi N, Harun D, Omar B, Ahmad M, Zagan M, Leonard JH.	Clin Ter. 2015 Nov-Dec;166(6):e361-4. doi: 10.7417/T.2015.1901.	Clin Ter. 2015	PubMed	citation	PMID:26794817	pubmed	26794817	create date:2016/01/23 | first author:Alwi N
New Minimum Relative Humidity Requirements Are Expected to Lead to More Medical Device Failures.	/pubmed/26660689	Kohani M, Pecht M.	J Med Syst. 2016 Mar;40(3):58. doi: 10.1007/s10916-015-0421-1. Epub 2015 Dec 10. Erratum in: J Med Syst. 2016 Apr;40(4):86.	J Med Syst. 2016	PubMed	citation	PMID:26660689	pubmed	26660689	create date:2015/12/15 | first author:Kohani M
Development and Evaluation of the Telephone Crisis Support Skills Scale.	/pubmed/26648228	Kitchingman TA, Wilson CJ, Caputi P, Woodward A, Hunt T.	Crisis. 2015;36(6):407-15. doi: 10.1027/0227-5910/a000341.	Crisis. 2015	PubMed	citation	PMID:26648228	pubmed	26648228	create date:2015/12/10 | first author:Kitchingman TA
Too Much to Bear: Psychometric Evidence Supporting the Perceived Burdensomeness Scale.	/pubmed/26620916	Peak NJ, Overholser JC, Ridley J, Braden A, Fisher L, Bixler J, Chandler M.	Crisis. 2016;37(1):59-67. doi: 10.1027/0227-5910/a000355. Epub 2015 Dec 1.	Crisis. 2016	PubMed	citation	PMID:26620916	pubmed	26620916	create date:2015/12/02 | first author:Peak NJ
Fool-proofing design and crisis management for customized intelligent physical fitness and healthcare system.	/pubmed/26578277	Huang CC, Huang CL, Liu HM.	Technol Health Care. 2015;24 Suppl 1:S407-13. doi: 10.3233/THC-151107.	Technol Health Care. 2015	PubMed	citation	PMID:26578277	pubmed	26578277	create date:2015/11/19 | first author:Huang CC
The Healthy Weight Disparity Index: Why We Need It to Solve the Obesity Crisis.	/pubmed/26548672	Taylor WC, Paxton RJ, Fischer LS, Bellows LL.	J Health Care Poor Underserved. 2015 Nov;26(4):1186-99. doi: 10.1353/hpu.2015.0132.	J Health Care Poor Underserved. 2015	PubMed	citation	PMID:26548672	pubmed	26548672	create date:2015/11/10 | first author:Taylor WC
Measuring Limit-Setting Practices Used by Family Members Towards Relatives with Psychiatric Disorders.	/pubmed/26518780	Labrum T, Walk M, Solomon PL.	Psychiatr Q. 2016 Sep;87(3):465-77. doi: 10.1007/s11126-015-9400-4.	Psychiatr Q. 2016	PubMed	citation	PMID:26518780	pubmed	26518780	create date:2015/11/01 | first author:Labrum T
[Background and practical use of the assessment of identity development in adolescence (AIDA)].	/pubmed/26493481	BirkhÌ¦lzer M, Goth K, Schrobildgen C, Schmeck K, SchlÌ_ter-MÌ_ller S.	Prax Kinderpsychol Kinderpsychiatr. 2015;64(8):584-600. doi: 10.13109/prkk.2015.64.8.584. German.	Prax Kinderpsychol Kinderpsychiatr. 2015	PubMed	citation	PMID:26493481	pubmed	26493481	create date:2015/10/27 | first author:BirkhÌ¦lzer M
Construction and initial validation of the Multiracial Experiences Measure (MEM).	/pubmed/26460977	Yoo HC, Jackson KF, Guevarra RP, Miller MJ, Harrington B.	J Couns Psychol. 2016 Mar;63(2):198-209. doi: 10.1037/cou0000117. Epub 2015 Oct 12.	J Couns Psychol. 2016	PubMed	citation	PMID:26460977 | PMCID:PMC4777648	pubmed	26460977	create date:2015/10/16 | first author:Yoo HC
Tackling reproducibility in academic preclinical drug discovery.	/pubmed/26388229	Frye SV, Arkin MR, Arrowsmith CH, Conn PJ, Glicksman MA, Hull-Ryde EA, Slusher BS.	Nat Rev Drug Discov. 2015 Nov;14(11):733-4. doi: 10.1038/nrd4737. Epub 2015 Sep 21.	Nat Rev Drug Discov. 2015	PubMed	citation	PMID:26388229	pubmed	26388229	create date:2015/09/22 | first author:Frye SV
Diagnosis and Assessment of NAFLD: Definitions and Histopathological Classification.	/pubmed/26378639	Burt AD, Lackner C, Tiniakos DG.	Semin Liver Dis. 2015 Aug;35(3):207-20. doi: 10.1055/s-0035-1562942. Epub 2015 Sep 17. Review.	Semin Liver Dis. 2015	PubMed	citation	PMID:26378639	pubmed	26378639	create date:2015/09/18 | first author:Burt AD
Investigating the validity and usability of an interactive computer programme for assessing competence in telephone-based mental health triage.	/pubmed/26365233	Sands N, Elsom S, Keppich-Arnold S, Henderson K, King P, Bourke-Finn K, Brunning D.	Int J Ment Health Nurs. 2016 Feb;25(1):80-6. doi: 10.1111/inm.12165. Epub 2015 Sep 14.	Int J Ment Health Nurs. 2016	PubMed	citation	PMID:26365233	pubmed	26365233	create date:2015/09/15 | first author:Sands N
Is psychology suffering from a replication crisis? What does "failure to replicate" really mean?	/pubmed/26348332	Maxwell SE, Lau MY, Howard GS.	Am Psychol. 2015 Sep;70(6):487-98. doi: 10.1037/a0039400.	Am Psychol. 2015	PubMed	citation	PMID:26348332	pubmed	26348332	create date:2015/09/09 | first author:Maxwell SE
Introducing EbolaCheck: potential for point-of-need infectious disease diagnosis.	/pubmed/26327281	Moschos SA.	Expert Rev Mol Diagn. 2015;15(10):1237-40. doi: 10.1586/14737159.2015.1084228. Epub 2015 Sep 1.	Expert Rev Mol Diagn. 2015	PubMed	citation	PMID:26327281	pubmed	26327281	create date:2015/09/04 | first author:Moschos SA
A tragedy of the (academic) commons: interpreting the replication crisis in psychology as a social dilemma for early-career researchers.	/pubmed/26300832	Everett JA, Earp BD.	Front Psychol. 2015 Aug 6;6:1152. doi: 10.3389/fpsyg.2015.01152. eCollection 2015. No abstract available.	Front Psychol. 2015	PubMed	citation	PMID:26300832 | PMCID:PMC4527093	pubmed	26300832	create date:2015/08/25 | first author:Everett JA
The sense of identity and symptoms of personality disorders - The results of a non-clinical population study.	/pubmed/26276925	Pilarska A, Suchaãska A.	Psychiatr Pol. 2015 May-Jun;49(3):599-613. doi: 10.12740/PP/21369. English, Polish.	Psychiatr Pol. 2015	PubMed	citation	PMID:26276925	pubmed	26276925	create date:2015/08/16 | first author:Pilarska A
Specific serum IgG at diagnosis of Staphylococcus aureus bloodstream invasion is correlated with disease progression.	/pubmed/26155744	Stentzel S, Sundaramoorthy N, Michalik S, NordengrÌ_n M, Schulz S, Kolata J, Kloppot P, Engelmann S, Steil L, Hecker M, Schmidt F, VÌ¦lker U, Roghmann MC, BrÌ¦ker BM.	J Proteomics. 2015 Oct 14;128:1-7. doi: 10.1016/j.jprot.2015.06.018. Epub 2015 Jul 5.	J Proteomics. 2015	PubMed	citation	PMID:26155744	pubmed	26155744	create date:2015/07/15 | first author:Stentzel S
Reversed-phase ion-pair chromatography-diode array detection of the bispyridinium compound MB327: plasma analysis of a potential novel antidote for the treatment of organophosphorus poisoning.	/pubmed/26041012	John H, Mikler J, Worek F, Thiermann H.	Drug Test Anal. 2016 Feb;8(2):154-63. doi: 10.1002/dta.1821. Epub 2015 Jun 4.	Drug Test Anal. 2016	PubMed	citation	PMID:26041012	pubmed	26041012	create date:2015/06/05 | first author:John H
Patient-reported assessment of self-management strategies of health in cancer patients: development and validation of the Smart Management Strategy for Health Assessment Tool (SAT).	/pubmed/26014043	Yun YH, Jung JY, Sim JA, Choi H, Lee JM, Noh DY, Han W, Park KJ, Jeong SY, Park JW, Wu HG, Chie EK, Kim HJ, Lee JH, Zo ZI, Kim S, Lee JE, Nam SJ, Lee ES, Oh JH, Kim YW, Kim YT, et al.	Psychooncology. 2015 Dec;24(12):1723-30. doi: 10.1002/pon.3839. Epub 2015 May 26.	Psychooncology. 2015	PubMed	citation	PMID:26014043	pubmed	26014043	create date:2015/05/28 | first author:Yun YH
Reproducibility crisis: Blame it on the antibodies.	/pubmed/25993940	Baker M.	Nature. 2015 May 21;521(7552):274-6. doi: 10.1038/521274a. No abstract available.	Nature. 2015	PubMed	citation	PMID:25993940	pubmed	25993940	create date:2015/05/23 | first author:Baker M
An RNA editing fingerprint of cancer stem cell reprogramming.	/pubmed/25889244	Crews LA, Jiang Q, Zipeto MA, Lazzari E, Court AC, Ali S, Barrett CL, Frazer KA, Jamieson CH.	J Transl Med. 2015 Feb 12;13:52. doi: 10.1186/s12967-014-0370-3.	J Transl Med. 2015	PubMed	citation	PMID:25889244 | PMCID:PMC4341880	pubmed	25889244	create date:2015/04/19 | first author:Crews LA
Inflammation and congenital heart disease associated pulmonary hypertension.	/pubmed/25881225	Gursoy M, Salihoglu E, Hatemi AC, Hokenek AF, Ozkan S, Ceyran H.	Heart Surg Forum. 2015 Feb 27;18(1):E38-41. doi: 10.1532/hsf.1228.	Heart Surg Forum. 2015	PubMed	citation	PMID:25881225	pubmed	25881225	create date:2015/04/17 | first author:Gursoy M
Change of practice patterns in urology with the introduction of the Da Vinci surgical system: the Greek NHS experience in debt crisis era.	/pubmed/25847898	Deligiannis D, Anastasiou I, Mygdalis V, Fragkiadis E, Stravodimos K.	Arch Ital Urol Androl. 2015 Mar 31;87(1):56-61. doi: 10.4081/aiua.2015.1.56.	Arch Ital Urol Androl. 2015	PubMed	citation	PMID:25847898	pubmed	25847898	create date:2015/04/08 | first author:Deligiannis D
Resilience in a reborn nation: Validation of the Lithuanian Resilience Scale for Adults (RSA).	/pubmed/25796289	Hilbig J, ViliÇnien€Ñ R, Friborg O, PakalniÁkien€Ñ V, Danilevi€iÇt€Ñ V.	Compr Psychiatry. 2015 Jul;60:126-33. doi: 10.1016/j.comppsych.2015.02.003. Epub 2015 Feb 17.	Compr Psychiatry. 2015	PubMed	citation	PMID:25796289	pubmed	25796289	create date:2015/03/23 | first author:Hilbig J
A reminder on millisecond timing accuracy and potential replication failure in computer-based psychology experiments: An open letter.	/pubmed/25761394	Plant RR.	Behav Res Methods. 2016 Mar;48(1):408-11. doi: 10.3758/s13428-015-0577-0.	Behav Res Methods. 2016	PubMed	citation	PMID:25761394	pubmed	25761394	create date:2015/03/13 | first author:Plant RR
Development of the Emergency Medical Services Role Identity Scale (EMS-RIS).	/pubmed/25760489	Donnelly EA, Siebert D, Siebert C.	Soc Work Health Care. 2015;54(3):212-33. doi: 10.1080/00981389.2014.999979.	Soc Work Health Care. 2015	PubMed	citation	PMID:25760489	pubmed	25760489	create date:2015/03/12 | first author:Donnelly EA
Screening for psychological difficulties in young children in crisis: complementary cross-cultural validation.	/pubmed/25740941	Marquer C, Barry C, Mouchenik Y, Djibo DM, Manzo ML, Trujillo Maza EM, Githaiga S, Casas G, Kirubi BW, Marichez H, Falissard B, Moro MR, Grais RF.	Int Health. 2015 Nov;7(6):438-46. doi: 10.1093/inthealth/ihv006. Epub 2015 Mar 4.	Int Health. 2015	PubMed	citation	PMID:25740941	pubmed	25740941	create date:2015/03/06 | first author:Marquer C
Objective structured assessment of nontechnical skills: Reliability of a global rating scale for the in-training assessment in the operating room.	/pubmed/25704419	Dedy NJ, Szasz P, Louridas M, Bonrath EM, Husslein H, Grantcharov TP.	Surgery. 2015 Jun;157(6):1002-13. doi: 10.1016/j.surg.2014.12.023. Epub 2015 Feb 20.	Surgery. 2015	PubMed	citation	PMID:25704419	pubmed	25704419	create date:2015/02/24 | first author:Dedy NJ
The changing face of hemostasis testing in modern laboratories: consolidation, automation, and beyond.	/pubmed/25703516	Lippi G, Plebani M, Favaloro EJ.	Semin Thromb Hemost. 2015 Apr;41(3):294-9. doi: 10.1055/s-0035-1544196. Epub 2015 Feb 19.	Semin Thromb Hemost. 2015	PubMed	citation	PMID:25703516	pubmed	25703516	create date:2015/02/24 | first author:Lippi G
Simulation as a high stakes assessment tool in emergency medicine.	/pubmed/25690440	O'Leary F.	Emerg Med Australas. 2015 Apr;27(2):173-5. doi: 10.1111/1742-6723.12370. Epub 2015 Feb 17.	Emerg Med Australas. 2015	PubMed	citation	PMID:25690440 | PMCID:PMC4415593	pubmed	25690440	create date:2015/02/19 | first author:O'Leary F
A purely confirmatory replication study of structural brain-behavior correlations.	/pubmed/25684445	Boekel W, Wagenmakers EJ, Belay L, Verhagen J, Brown S, Forstmann BU.	Cortex. 2015 May;66:115-33. doi: 10.1016/j.cortex.2014.11.019. Epub 2015 Jan 14.	Cortex. 2015	PubMed	citation	PMID:25684445	pubmed	25684445	create date:2015/02/17 | first author:Boekel W
Performance of rapid influenza diagnostic tests (QuickVue) for influenza A and B Infection in India.	/pubmed/25657152	Koul PA, Mir H, Bhat MA, Khan UH, Khan MM, Chadha MS, Lal RB.	Indian J Med Microbiol. 2015 Feb;33 Suppl:26-31. doi: 10.4103/0255-0857.148831.	Indian J Med Microbiol. 2015	PubMed	citation	PMID:25657152 | PMCID:PMC4830807	pubmed	25657152	create date:2015/02/07 | first author:Koul PA
Vertebroplasty Performance on Simulator for 19 Surgeons Using Hierarchical Task Analysis.	/pubmed/25585414	Wucherer P, Stefan P, Abhari K, Fallavollita P, Weigl M, Lazarovici M, Winkler A, Weidert S, Peters T, de Ribaupierre S, Eagleson R, Navab N.	IEEE Trans Med Imaging. 2015 Aug;34(8):1730-7. doi: 10.1109/TMI.2015.2389033. Epub 2015 Jan 8.	IEEE Trans Med Imaging. 2015	PubMed	citation	PMID:25585414	pubmed	25585414	create date:2015/01/15 | first author:Wucherer P
Reproducibility in science: improving the standard for basic and preclinical research.	/pubmed/25552691	Begley CG, Ioannidis JP.	Circ Res. 2015 Jan 2;116(1):116-26. doi: 10.1161/CIRCRESAHA.114.303819. Review.	Circ Res. 2015	PubMed	citation	PMID:25552691	pubmed	25552691	create date:2015/01/02 | first author:Begley CG
Interrater reliability of the Silverman et al. nomenclature for suicide-related ideations, behaviors, and communications.	/pubmed/25410253	Kattimani S, Bharadwaj B, Sarkar S, Mukherjee A.	Crisis. 2015;36(1):61-4. doi: 10.1027/0227-5910/a000283.	Crisis. 2015	PubMed	citation	PMID:25410253	pubmed	25410253	create date:2014/11/21 | first author:Kattimani S
[Validity of the suicidality assessment instrument PRISM-S (Pictoral Representation of Illness Self Measure - Suicidality)].	/pubmed/25391337	Ring M, Harbauer G, Haas S, Schuetz C, Andreae A, Maercker A, Ajdacic-Gross V.	Neuropsychiatr. 2014;28(4):192-7. doi: 10.1007/s40211-014-0123-9. Epub 2014 Nov 13. German.	Neuropsychiatr. 2014	PubMed	citation	PMID:25391337	pubmed	25391337	create date:2014/11/14 | first author:Ring M
Interobserver variance in myelodysplastic syndromes with less than 5 % bone marrow blasts: unilineage vs. multilineage dysplasia and reproducibility of the threshold of 2 % blasts.	/pubmed/25387664	Font P, Loscertales J, Soto C, Ricard P, Novas CM, MartÌ_n-Clavero E, LÌ_pez-Rubio M, Garcia-Alonso L, Callejas M, Bermejo A, Benavente C, Ballesteros M, Cedena T, Calbacho M, Urbina R, Villarrubia J, Gil S, BellÌ_n JM, Diez-Martin JL, Villegas A.	Ann Hematol. 2015 Apr;94(4):565-73. doi: 10.1007/s00277-014-2252-4. Epub 2014 Nov 13.	Ann Hematol. 2015	PubMed	citation	PMID:25387664	pubmed	25387664	create date:2014/11/13 | first author:Font P
When more data steer us wrong: replications with the wrong dependent measure perpetuate erroneous conclusions.	/pubmed/25384892	Rotello CM, Heit E, DubÌ© C.	Psychon Bull Rev. 2015 Aug;22(4):944-54. doi: 10.3758/s13423-014-0759-2. Review.	Psychon Bull Rev. 2015	PubMed	citation	PMID:25384892	pubmed	25384892	create date:2014/11/12 | first author:Rotello CM
Metascience could rescue the 'replication crisis'.	/pubmed/25373639	Schooler JW.	Nature. 2014 Nov 6;515(7525):9. doi: 10.1038/515009a. No abstract available.	Nature. 2014	PubMed	citation	PMID:25373639	pubmed	25373639	create date:2014/11/07 | first author:Schooler JW
New forms of checks and balances are needed to improve research integrity.	/pubmed/25324963	Iorns E, Chong C.	F1000Res. 2014 May 28;3:119. doi: 10.12688/f1000research.3714.1. eCollection 2014.	F1000Res. 2014	PubMed	citation	PMID:25324963 | PMCID:PMC4197740	pubmed	25324963	create date:2014/10/18 | first author:Iorns E
Measuring symptoms and diagnosing mental disorders in the elderly community: the test-retest reliability of the CIDI65.	/pubmed/25308743	Wittchen HU, Strehle J, Gerschler A, Volkert J, Dehoust MC, Sehner S, Wegscheider K, AusÌÂn B, Canuto A, Crawford M, Da Ronch C, Grassi L, Hershkovitz Y, Munoz M, Quirk A, Rotenstein O, Santos-Olmo AB, Shalev A, Weber K, Schulz H, HÌ_rter M, Andreas S.	Int J Methods Psychiatr Res. 2015 Jun;24(2):116-29. doi: 10.1002/mpr.1455. Epub 2014 Oct 13.	Int J Methods Psychiatr Res. 2015	PubMed	citation	PMID:25308743	pubmed	25308743	create date:2014/10/14 | first author:Wittchen HU
Potential new therapeutic modality revealed through agent-based modeling of the neuromuscular junction and acetylcholinesterase inhibition.	/pubmed/25273339	Chapleau RR, Robinson PJ, Schlager JJ, Gearhart JM.	Theor Biol Med Model. 2014 Oct 2;11:42. doi: 10.1186/1742-4682-11-42.	Theor Biol Med Model. 2014	PubMed	citation	PMID:25273339 | PMCID:PMC4209019	pubmed	25273339	create date:2014/10/03 | first author:Chapleau RR
3ë_-hydroxysteroid dehydrogenase type II deficiency on newborn screening test.	/pubmed/25211449	AraÌ¼jo VG, Oliveira RS, Gameleira KP, Cruz CB, Lofrano-Porto A.	Arq Bras Endocrinol Metabol. 2014 Aug;58(6):650-5.	Arq Bras Endocrinol Metabol. 2014	PubMed	citation	PMID:25211449	pubmed	25211449	create date:2014/09/12 | first author:AraÌ¼jo VG
Validity and reliability assessment of detailed scoring checklists for use during perioperative emergency simulation training.	/pubmed/25188486	McEvoy MD, Hand WR, Furse CM, Field LC, Clark CA, Moitra VK, Nietert PJ, O'Connor MF, Nunnally ME.	Simul Healthc. 2014 Oct;9(5):295-303. doi: 10.1097/SIH.0000000000000048.	Simul Healthc. 2014	PubMed	citation	PMID:25188486 | PMCID:PMC4182114	pubmed	25188486	create date:2014/09/05 | first author:McEvoy MD
Cross Racial Identity Scale (CRIS) scores and profiles in African American adolescents involved with the juvenile justice system.	/pubmed/25151117	Worrell FC, Andretta JR, Woodland MH.	J Couns Psychol. 2014 Oct;61(4):570-80. doi: 10.1037/cou0000041. Epub 2014 Aug 25.	J Couns Psychol. 2014	PubMed	citation	PMID:25151117	pubmed	25151117	create date:2014/08/26 | first author:Worrell FC
Immortalization of T-cells is accompanied by gradual changes in CpG methylation resulting in a profile resembling a subset of T-cell leukemias.	/pubmed/25065939	Degerman S, Landfors M, Siwicki JK, Revie J, BorssÌ©n M, EvelÌ¦nn E, Forestier E, Chrzanowska KH, RydÌ©n P, Keith WN, Roos G.	Neoplasia. 2014 Jul;16(7):606-15. doi: 10.1016/j.neo.2014.07.001. Epub 2014 Jul 22.	Neoplasia. 2014	PubMed	citation	PMID:25065939 | PMCID:PMC4198827	pubmed	25065939	create date:2014/07/30 | first author:Degerman S
[Four measures of treatment compliance among patients recovering from psychotic episodes--a comparative study].	/pubmed/25011225	Friemann K, WciÌ_rka J.	Psychiatr Pol. 2013 Sep-Oct;47(5):759-73. Polish.	Psychiatr Pol. 2013	PubMed	citation	PMID:25011225	pubmed	25011225	create date:2014/07/12 | first author:Friemann K
Initial development of the Coach Identity Prominence Scale: a role identity model perspective.	/pubmed/24918308	Pope JP, Hall CR.	J Sport Exerc Psychol. 2014 Jun;36(3):257. doi: 10.1123/jsep.2013-0039.	J Sport Exerc Psychol. 2014	PubMed	citation	PMID:24918308	pubmed	24918308	create date:2014/06/12 | first author:Pope JP
Serial assessment of laser Doppler flow during acute pain crises in sickle cell disease.	/pubmed/24857171	Shi PA, Manwani D, Olowokure O, Nandi V.	Blood Cells Mol Dis. 2014 Dec;53(4):277-82. doi: 10.1016/j.bcmd.2014.04.001. Epub 2014 May 21.	Blood Cells Mol Dis. 2014	PubMed	citation	PMID:24857171 | PMCID:PMC4198432	pubmed	24857171	create date:2014/05/27 | first author:Shi PA
Psychometric properties of the Stress and Crisis Inventory (SCI-93) in females with fibromyalgia and chronic widespread pain.	/pubmed/24848785	Ericsson A, NystrÌ¦m C, Mannerkorpi K.	Nord J Psychiatry. 2015 Jan;69(1):28-34. doi: 10.3109/08039488.2014.915580. Epub 2014 May 21.	Nord J Psychiatry. 2015	PubMed	citation	PMID:24848785	pubmed	24848785	create date:2014/05/23 | first author:Ericsson A
Discrimination between authentic and adulterated liquors by near-infrared spectroscopy and ensemble classification.	/pubmed/24792198	Chen H, Tan C, Wu T, Wang L, Zhu W.	Spectrochim Acta A Mol Biomol Spectrosc. 2014 Sep 15;130:245-9. doi: 10.1016/j.saa.2014.03.091. Epub 2014 Apr 2.	Spectrochim Acta A Mol Biomol Spectrosc. 2014	PubMed	citation	PMID:24792198	pubmed	24792198	create date:2014/05/06 | first author:Chen H
Multicriteria decision analysis methods with 1000Minds for developing systemic sclerosis classification criteria.	/pubmed/24721558	Johnson SR, Naden RP, Fransen J, van den Hoogen F, Pope JE, Baron M, Tyndall A, Matucci-Cerinic M, Denton CP, Distler O, Gabrielli A, van Laar JM, Mayes M, Steen V, Seibold JR, Clements P, Medsger TA Jr, Carreira PE, Riemekasten G, Chung L, Fessler BJ, Merkel PA, et al.	J Clin Epidemiol. 2014 Jun;67(6):706-14. doi: 10.1016/j.jclinepi.2013.12.009. Epub 2014 Apr 8.	J Clin Epidemiol. 2014	PubMed	citation	PMID:24721558 | PMCID:PMC4134523	pubmed	24721558	create date:2014/04/12 | first author:Johnson SR
Epileptogenic lesion quantification in MRI using contralateral 3D texture comparisons.	/pubmed/24579160	JimÌ©nez del Toro OA, Foncubierta-RodrÌ_guez A, Vargas GÌ_mez MI, MÌ_ller H, Depeursinge A.	Med Image Comput Comput Assist Interv. 2013;16(Pt 2):353-60.	Med Image Comput Comput Assist Interv. 2013	PubMed	citation	PMID:24579160	pubmed	24579160	create date:2014/03/01 | first author:JimÌ©nez del Toro OA
Neonatal case of classic maple syrup urine disease: usefulness of (1) H-MRS in early diagnosis.	/pubmed/24548198	Sato T, Muroya K, Hanakawa J, Asakura Y, Aida N, Tomiyasu M, Tajima G, Hasegawa T, Adachi M.	Pediatr Int. 2014 Feb;56(1):112-5. doi: 10.1111/ped.12211.	Pediatr Int. 2014	PubMed	citation	PMID:24548198	pubmed	24548198	create date:2014/02/20 | first author:Sato T
Inventory of complicated spiritual grief: development and validation of a new measure.	/pubmed/24524587	Burke LA, Neimeyer RA, Holland JM, Dennard S, Oliver L, Shear MK.	Death Stud. 2014 Jan-Jun;38(1-5):239-50. doi: 10.1080/07481187.2013.810098. Epub 2013 Nov 11.	Death Stud. 2014	PubMed	citation	PMID:24524587	pubmed	24524587	create date:2014/02/15 | first author:Burke LA
Validity of the clinical and content scales of the Multiphasic Personality Inventory Minnesota 2 for the diagnosis of psychogenic non-epileptic seizures.	/pubmed/24485649	del Barrio A, JimÌ©nez-Huete A, Toledano R, GarcÌ_a-Morales I, Gil-Nagel A.	Neurologia. 2016 Mar;31(2):106-12. doi: 10.1016/j.nrl.2013.12.006. Epub 2014 Jan 30. English, Spanish.	Neurologia. 2016	PubMed	citation	PMID:24485649	pubmed	24485649	create date:2014/02/04 | first author:del Barrio A
Short-term effects of the 2008 Great Recession on the health of the Italian population: an ecological study.	/pubmed/24445578	Mattei G, Ferrari S, Pingani L, Rigatelli M.	Soc Psychiatry Psychiatr Epidemiol. 2014 Jun;49(6):851-8. doi: 10.1007/s00127-014-0818-z. Epub 2014 Jan 21.	Soc Psychiatry Psychiatr Epidemiol. 2014	PubMed	citation	PMID:24445578	pubmed	24445578	create date:2014/01/22 | first author:Mattei G
Development of a microarray for two rice subspecies: characterization and validation of gene expression in rice tissues.	/pubmed/24398116	Chen JS, Lin SC, Chen CY, Hsieh YT, Pai PH, Chen LK, Lee S.	BMC Res Notes. 2014 Jan 8;7:15. doi: 10.1186/1756-0500-7-15.	BMC Res Notes. 2014	PubMed	citation	PMID:24398116 | PMCID:PMC3891988	pubmed	24398116	create date:2014/01/09 | first author:Chen JS
The Alleged Crisis and the Illusion of Exact Replication.	/pubmed/26173241	Stroebe W, Strack F.	Perspect Psychol Sci. 2014 Jan;9(1):59-71. doi: 10.1177/1745691613514450.	Perspect Psychol Sci. 2014	PubMed	citation	PMID:26173241	pubmed	26173241	create date:2014/01/01 | first author:Stroebe W
[German translation of Suicidal Patient Observation Chart (SPOC) - an instrument for practice].	/pubmed/24297829	LÌ¦hr M, Schulz M, Hemkendreis B, BjÌ¦rkdahl A, Nienaber A.	Pflege. 2013 Dec;26(6):401-10. doi: 10.1024/1012-5302/a000328. German.	Pflege. 2013	PubMed	citation	PMID:24297829	pubmed	24297829	create date:2013/12/04 | first author:LÌ¦hr M
Medium-chain acyl-CoA deficiency: outlines from newborn screening, in silico predictions, and molecular studies.	/pubmed/24294134	Catarzi S, Caciotti A, Thusberg J, Tonin R, Malvagia S, la Marca G, Pasquini E, Cavicchi C, Ferri L, Donati MA, Baronio F, Guerrini R, Mooney SD, Morrone A.	ScientificWorldJournal. 2013 Oct 31;2013:625824. doi: 10.1155/2013/625824. eCollection 2013.	ScientificWorldJournal. 2013	PubMed	citation	PMID:24294134 | PMCID:PMC3833120	pubmed	24294134	create date:2013/12/03 | first author:Catarzi S
Exploring QSTR modeling and toxicophore mapping for identification of important molecular features contributing to the chemical toxicity in Escherichia coli.	/pubmed/24246193	Pramanik S, Roy K.	Toxicol In Vitro. 2014 Mar;28(2):265-72. doi: 10.1016/j.tiv.2013.11.002. Epub 2013 Nov 15.	Toxicol In Vitro. 2014	PubMed	citation	PMID:24246193	pubmed	24246193	create date:2013/11/20 | first author:Pramanik S
Peer review and reproducibility. Crisis or time for course correction?	/pubmed/24217925	Couchman JR.	J Histochem Cytochem. 2014 Jan;62(1):9-10. doi: 10.1369/0022155413513462. Epub 2013 Nov 11. No abstract available.	J Histochem Cytochem. 2014	PubMed	citation	PMID:24217925 | PMCID:PMC3873808	pubmed	24217925	create date:2013/11/13 | first author:Couchman JR
Conjoint Community Resiliency Assessment Measure-28/10 items (CCRAM28 and CCRAM10): A self-report tool for assessing community resilience.	/pubmed/24091563	Leykin D, Lahad M, Cohen O, Goldberg A, Aharonson-Daniel L.	Am J Community Psychol. 2013 Dec;52(3-4):313-23. doi: 10.1007/s10464-013-9596-0.	Am J Community Psychol. 2013	PubMed	citation	PMID:24091563	pubmed	24091563	create date:2013/10/05 | first author:Leykin D
The Brief Psychiatric Rating Scale (version 4.0) factorial structure and its sensitivity in the treatment of outpatients with unipolar depression.	/pubmed/23890713	Zanello A, Berthoud L, Ventura J, Merlo MC.	Psychiatry Res. 2013 Dec 15;210(2):626-33. doi: 10.1016/j.psychres.2013.07.001. Epub 2013 Jul 26.	Psychiatry Res. 2013	PubMed	citation	PMID:23890713 | PMCID:PMC4059178	pubmed	23890713	create date:2013/07/31 | first author:Zanello A
The performance of an online osteoporosis detection system a sensitivity and specificity analysis.	/pubmed/23876185	Chang SF, Hong CM, Yang RS.	J Clin Nurs. 2014 Jul;23(13-14):1803-9. doi: 10.1111/jocn.12209. Epub 2013 Jul 22.	J Clin Nurs. 2014	PubMed	citation	PMID:23876185	pubmed	23876185	create date:2013/07/24 | first author:Chang SF
An empirical study of the toxic capsule crisis in China: risk perceptions and behavioral responses.	/pubmed/23859541	Feng T, Keller LR, Wu P, Xu Y.	Risk Anal. 2014 Apr;34(4):698-710. doi: 10.1111/risa.12099. Epub 2013 Jul 16.	Risk Anal. 2014	PubMed	citation	PMID:23859541	pubmed	23859541	create date:2013/07/19 | first author:Feng T
The Managing Emergencies in Paediatric Anaesthesia global rating scale is a reliable tool for simulation-based assessment in pediatric anesthesia crisis management.	/pubmed/23800112	Everett TC, Ng E, Power D, Marsh C, Tolchard S, Shadrina A, Bould MD.	Paediatr Anaesth. 2013 Dec;23(12):1117-23. doi: 10.1111/pan.12212. Epub 2013 Jun 26.	Paediatr Anaesth. 2013	PubMed	citation	PMID:23800112	pubmed	23800112	create date:2013/06/27 | first author:Everett TC
Within-team debriefing versus instructor-led debriefing for simulation-based education: a randomized controlled trial.	/pubmed/23728281	Boet S, Bould MD, Sharma B, Revees S, Naik VN, Triby E, Grantcharov T.	Ann Surg. 2013 Jul;258(1):53-8. doi: 10.1097/SLA.0b013e31829659e4.	Ann Surg. 2013	PubMed	citation	PMID:23728281	pubmed	23728281	create date:2013/06/04 | first author:Boet S
Ectopic activation of germline and placental genes identifies aggressive metastasis-prone lung cancers.	/pubmed/23698379	Rousseaux S, Debernardi A, Jacquiau B, Vitte AL, Vesin A, Nagy-Mignotte H, Moro-Sibilot D, Brichon PY, Lantuejoul S, Hainaut P, Laffaire J, de ReyniÌ¬s A, Beer DG, Timsit JF, Brambilla C, Brambilla E, Khochbin S.	Sci Transl Med. 2013 May 22;5(186):186ra66. doi: 10.1126/scitranslmed.3005723.	Sci Transl Med. 2013	PubMed	citation	PMID:23698379 | PMCID:PMC4818008	pubmed	23698379	create date:2013/05/24 | first author:Rousseaux S
Comparing the accuracy of experimental estimates to guessing: a new perspective on replication and the "Crisis of Confidence" in psychology.	/pubmed/23661222	Davis-Stober CP, Dana J.	Behav Res Methods. 2014 Mar;46(1):1-14. doi: 10.3758/s13428-013-0342-1.	Behav Res Methods. 2014	PubMed	citation	PMID:23661222	pubmed	23661222	create date:2013/05/11 | first author:Davis-Stober CP
Comparison of automated differential blood cell counts from Abbott Sapphire, Siemens Advia 120, Beckman Coulter DxH 800, and Sysmex XE-2100 in normal and pathologic samples.	/pubmed/23596116	Meintker L, Ringwald J, Rauh M, Krause SW.	Am J Clin Pathol. 2013 May;139(5):641-50. doi: 10.1309/AJCP7D8ECZRXGWCG.	Am J Clin Pathol. 2013	PubMed	citation	PMID:23596116	pubmed	23596116	create date:2013/04/19 | first author:Meintker L
Measuring ward-based multidisciplinary healthcare team functioning: a validation study of the Team Functioning Assessment Tool (TFAT).	/pubmed/23551303	Sutton G, Liao J, Jimmieson NL, Restubog SL.	J Healthc Qual. 2013 Jul-Aug;35(4):36-49. doi: 10.1111/jhq.12010. Epub 2013 Apr 3.	J Healthc Qual. 2013	PubMed	citation	PMID:23551303	pubmed	23551303	create date:2013/04/05 | first author:Sutton G
Suicidality assessment with PRISM-S - simple, fast, and visual: a brief nonverbal method to assess suicidality in adolescent and adult patients.	/pubmed/23261912	Harbauer G, Ring M, Schuetz C, Andreae A, Haas S.	Crisis. 2013;34(2):131-6. doi: 10.1027/0227-5910/a000164.	Crisis. 2013	PubMed	citation	PMID:23261912	pubmed	23261912	create date:2012/12/25 | first author:Harbauer G
Assessment and improvement of radiation oncology trainee contouring ability utilizing consensus-based penalty metrics.	/pubmed/23210589	Hallock A, Bauman G, Read N, D'Souza D, Perera F, Aivas I, Best L, Cao J, Louie AV, Wiebe E, Sexton T, Gaede S, Battista J, Rodrigues G.	J Med Imaging Radiat Oncol. 2012 Dec;56(6):679-88. doi: 10.1111/j.1754-9485.2012.02440.x. Epub 2012 Sep 5.	J Med Imaging Radiat Oncol. 2012	PubMed	citation	PMID:23210589	pubmed	23210589	create date:2012/12/06 | first author:Hallock A
An improved high performance liquid chromatography-fluorescence detection method for the analysis of major phenolic compounds in cigarette smoke and smokeless tobacco products.	/pubmed/23062878	Wu J, Rickert WS, Masters A.	J Chromatogr A. 2012 Nov 16;1264:40-7. doi: 10.1016/j.chroma.2012.09.060. Epub 2012 Sep 25.	J Chromatogr A. 2012	PubMed	citation	PMID:23062878	pubmed	23062878	create date:2012/10/16 | first author:Wu J
The prevalence and correlates of receiving confirmatory HIV test results among newly diagnosed HIV-positive individuals at a community-based testing center.	/pubmed/23016505	Feldman M, Wu E, Mendoza M, Lowry B, Ford L, Holloway I.	AIDS Educ Prev. 2012 Oct;24(5):445-55.	AIDS Educ Prev. 2012	PubMed	citation	PMID:23016505	pubmed	23016505	create date:2012/09/29 | first author:Feldman M
Does an educational intervention improve the usefulness of the Health of the Nation Outcome Scales in an acute mental health setting?	/pubmed/22957987	Webster J, Bretherton F, Goulter NS, Fawcett L.	Int J Ment Health Nurs. 2013 Aug;22(4):322-8. doi: 10.1111/j.1447-0349.2012.00868.x. Epub 2012 Sep 10.	Int J Ment Health Nurs. 2013	PubMed	citation	PMID:22957987	pubmed	22957987	create date:2012/09/11 | first author:Webster J
Unanticipated difficult airway in obstetric patients: development of a new algorithm for formative assessment in high-fidelity simulation.	/pubmed/22890116	Balki M, Cooke ME, Dunington S, Salman A, Goldszmidt E.	Anesthesiology. 2012 Oct;117(4):883-97.	Anesthesiology. 2012	PubMed	citation	PMID:22890116	pubmed	22890116	create date:2012/08/15 | first author:Balki M
The Stigma of Suicide Scale. Psychometric properties and correlates of the stigma of suicide.	/pubmed/22846447	Batterham PJ, Calear AL, Christensen H.	Crisis. 2013 Jan 1;34(1):13-21. doi: 10.1027/0227-5910/a000156.	Crisis. 2013	PubMed	citation	PMID:22846447	pubmed	22846447	create date:2012/08/01 | first author:Batterham PJ
The HEADS-ED: a rapid mental health screening tool for pediatric patients in the emergency department.	/pubmed/22826567	Cappelli M, Gray C, Zemek R, Cloutier P, Kennedy A, Glennie E, Doucet G, Lyons JS.	Pediatrics. 2012 Aug;130(2):e321-7. doi: 10.1542/peds.2011-3798. Epub 2012 Jul 23.	Pediatrics. 2012	PubMed	citation	PMID:22826567	pubmed	22826567	create date:2012/07/25 | first author:Cappelli M
Quantitative analysis of intraoperative communication in open and laparoscopic surgery.	/pubmed/22538692	Sevdalis N, Wong HW, Arora S, Nagpal K, Healey A, Hanna GB, Vincent CA.	Surg Endosc. 2012 Oct;26(10):2931-8. Epub 2012 Apr 27.	Surg Endosc. 2012	PubMed	citation	PMID:22538692	pubmed	22538692	create date:2012/04/28 | first author:Sevdalis N
[Risk communication during health crises: results of a cross-sectional study to evaluate the effectiveness of adopted corporate communication strategies during the H1N1 influenza pandemic in Italy and on the training needs of health professionals].	/pubmed/22507993	De Giusti M, Mannocci A, Miccoli S, Palazzo C, Di Thiene D, Scalmato V, Ursillo P, Monteduro MA, Turri A, Mazzoli PG, Boccia A, La Torre G.	Ig Sanita Pubbl. 2012 Jan-Feb;68(1):69-84. Italian.	Ig Sanita Pubbl. 2012	PubMed	citation	PMID:22507993	pubmed	22507993	create date:2012/04/18 | first author:De Giusti M
Classification Algorithm for the Determination of Suicide Attempt and Suicide (CAD-SAS). Development and psychometric properties.	/pubmed/22450036	Fedyszyn IE, Harris MG, Robinson J, Paxton SJ.	Crisis. 2012 Jan 1;33(3):151-61. doi: 10.1027/0227-5910/a000122.	Crisis. 2012	PubMed	citation	PMID:22450036	pubmed	22450036	create date:2012/03/28 | first author:Fedyszyn IE
Probiotics - do they have a role in the pig industry?	/pubmed/22445413	Kenny M, Smidt H, Mengheri E, Miller B.	Animal. 2011 Mar;5(3):462-70. doi: 10.1017/S175173111000193X.	Animal. 2011	PubMed	citation	PMID:22445413	pubmed	22445413	create date:2012/03/27 | first author:Kenny M
Bedside vestibular examination in patients with unilateral definite MÌ©niÌ¬re's disease.	/pubmed/22264068	Marques PS, Perez-Fernandez N.	Acta Otolaryngol. 2012 May;132(5):498-504. doi: 10.3109/00016489.2011.646357. Epub 2012 Jan 21.	Acta Otolaryngol. 2012	PubMed	citation	PMID:22264068	pubmed	22264068	create date:2012/01/24 | first author:Marques PS
Systematic review of meaning in life assessment instruments.	/pubmed/22232017	BrandstÌ_tter M, Baumann U, Borasio GD, Fegg MJ.	Psychooncology. 2012 Oct;21(10):1034-52. doi: 10.1002/pon.2113. Epub 2012 Jan 10. Review.	Psychooncology. 2012	PubMed	citation	PMID:22232017	pubmed	22232017	create date:2012/01/11 | first author:BrandstÌ_tter M
A metabolic index of ischemic injury for perfusion-recovery of cadaveric rat livers.	/pubmed/22194843	Perk S, Izamis ML, Tolboom H, Uygun B, Berthiaume F, Yarmush ML, Uygun K.	PLoS One. 2011;6(12):e28518. doi: 10.1371/journal.pone.0028518. Epub 2011 Dec 14.	PLoS One. 2011	PubMed	citation	PMID:22194843 | PMCID:PMC3237452	pubmed	22194843	create date:2011/12/24 | first author:Perk S
An algorithm to assess methodological quality of nutrition and mortality cross-sectional surveys: development and application to surveys conducted in Darfur, Sudan.	/pubmed/22071133	Prudhon C, de RadiguÌ¬s X, Dale N, Checchi F.	Popul Health Metr. 2011 Nov 9;9(1):57. doi: 10.1186/1478-7954-9-57.	Popul Health Metr. 2011	PubMed	citation	PMID:22071133 | PMCID:PMC3231955	pubmed	22071133	create date:2011/11/11 | first author:Prudhon C
European Bone Marrow Working Group trial on reproducibility of World Health Organization criteria to discriminate essential thrombocythemia from prefibrotic primary myelofibrosis.	/pubmed/22058215	Buhr T, Hebeda K, Kaloutsi V, Porwit A, Van der Walt J, Kreipe H.	Haematologica. 2012 Mar;97(3):360-5. doi: 10.3324/haematol.2011.047811. Epub 2011 Nov 4.	Haematologica. 2012	PubMed	citation	PMID:22058215 | PMCID:PMC3291589	pubmed	22058215	create date:2011/11/08 | first author:Buhr T
Validation of potential classification criteria for systemic sclerosis.	/pubmed/22052658	Johnson SR, Fransen J, Khanna D, Baron M, van den Hoogen F, Medsger TA Jr, Peschken CA, Carreira PE, Riemekasten G, Tyndall A, Matucci-Cerinic M, Pope JE.	Arthritis Care Res (Hoboken). 2012 Mar;64(3):358-67. doi: 10.1002/acr.20684.	Arthritis Care Res (Hoboken). 2012	PubMed	citation	PMID:22052658 | PMCID:PMC3376721	pubmed	22052658	create date:2011/11/05 | first author:Johnson SR
Development and initial reliability and validity of four self-report measures used in research on interactions between police officers and individuals with mental illnesses.	/pubmed/21764139	Broussard B, Krishan S, Hankerson-Dyson D, Husbands L, Stewart-Hutto T, Compton MT.	Psychiatry Res. 2011 Oct 30;189(3):458-62. doi: 10.1016/j.psychres.2011.06.017. Epub 2011 Jul 20.	Psychiatry Res. 2011	PubMed	citation	PMID:21764139 | PMCID:PMC3185193	pubmed	21764139	create date:2011/07/19 | first author:Broussard B
A test of the validity of the IS PATH WARM warning signs for suicide.	/pubmed/21675556	Lester D, McSwain S, Gunn JF 3rd.	Psychol Rep. 2011 Apr;108(2):402-4.	Psychol Rep. 2011	PubMed	citation	PMID:21675556	pubmed	21675556	create date:2011/06/17 | first author:Lester D
Expression patterns of microRNAs associated with CML phases and their disease related targets.	/pubmed/21501493	MachovÌÁ PolÌÁkovÌÁ K, LopotovÌÁ T, KlamovÌÁ H, Burda P, Trn€ÝnÌ_ M, Stopka T, MoravcovÌÁ J.	Mol Cancer. 2011 Apr 18;10:41. doi: 10.1186/1476-4598-10-41.	Mol Cancer. 2011	PubMed	citation	PMID:21501493 | PMCID:PMC3102634	pubmed	21501493	create date:2011/04/20 | first author:MachovÌÁ PolÌÁkovÌÁ K
Validation of a self-efficacy instrument and its relationship to performance of crisis resource management skills.	/pubmed/21264508	Plant JL, van Schaik SM, Sliwka DC, Boscardin CK, O'Sullivan PS.	Adv Health Sci Educ Theory Pract. 2011 Dec;16(5):579-90. doi: 10.1007/s10459-011-9274-7. Epub 2011 Jan 25.	Adv Health Sci Educ Theory Pract. 2011	PubMed	citation	PMID:21264508 | PMCID:PMC3226693	pubmed	21264508	create date:2011/01/26 | first author:Plant JL
Tracheobronchial foreign body aspiration in children: how reliable are clinical and radiological signs in the diagnosis?	/pubmed/21199409	Orji FT, Akpeh JO.	Clin Otolaryngol. 2010 Dec;35(6):479-85. doi: 10.1111/j.1749-4486.2010.02214.x.	Clin Otolaryngol. 2010	PubMed	citation	PMID:21199409	pubmed	21199409	create date:2011/01/05 | first author:Orji FT
Counting suicides and making suicide count as a public health problem.	/pubmed/21134841	Rockett IR.	Crisis. 2010;31(5):227-30. doi: 10.1027/0227-5910/a000071. No abstract available.	Crisis. 2010	PubMed	citation	PMID:21134841	pubmed	21134841	create date:2010/12/08 | first author:Rockett IR
A simple and useful coma scale for patients with neurologic emergencies: the Emergency Coma Scale.	/pubmed/20825789	Takahashi C, Okudera H, Origasa H, Takeuchi E, Nakamura K, Fukuda O, Date I, Tokutomi T, Aruga T, Sakamoto T, Kobata H, Ohta T.	Am J Emerg Med. 2011 Feb;29(2):196-202. doi: 10.1016/j.ajem.2009.09.018. Epub 2010 Mar 25.	Am J Emerg Med. 2011	PubMed	citation	PMID:20825789	pubmed	20825789	create date:2010/09/10 | first author:Takahashi C
Validity of proxy-based reports of impulsivity and aggression in Chinese research on suicidal behavior.	/pubmed/20573607	An J, Phillips MR, Conner KR.	Crisis. 2010;31(3):137-42. doi: 10.1027/0227-5910/a000019.	Crisis. 2010	PubMed	citation	PMID:20573607	pubmed	20573607	create date:2010/06/25 | first author:An J
Critical elements of the crisis intervention team model of jail diversion: an expert survey.	/pubmed/20568255	McGuire AB, Bond GR.	Behav Sci Law. 2011 Jan-Feb;29(1):81-94. doi: 10.1002/bsl.941. Epub 2010 Jun 21.	Behav Sci Law. 2011	PubMed	citation	PMID:20568255	pubmed	20568255	create date:2010/06/23 | first author:McGuire AB
Biologists tackle cells' identity crisis.	/pubmed/20520682	Katsnelson A.	Nature. 2010 Jun 3;465(7298):537. doi: 10.1038/465537a. No abstract available.	Nature. 2010	PubMed	citation	PMID:20520682	pubmed	20520682	create date:2010/06/04 | first author:Katsnelson A
Diffusion tensor imaging detects areas of abnormal white matter microstructure in patients with partial ornithine transcarbamylase deficiency.	/pubmed/20488904	Gropman AL, Gertz B, Shattuck K, Kahn IL, Seltzer R, Krivitsky L, Van Meter J.	AJNR Am J Neuroradiol. 2010 Oct;31(9):1719-23. doi: 10.3174/ajnr.A2122. Epub 2010 May 20.	AJNR Am J Neuroradiol. 2010	PubMed	citation	PMID:20488904 | PMCID:PMC3758695	pubmed	20488904	create date:2010/05/22 | first author:Gropman AL
Evaluation of the reliability and validity of two clinician-judgment suicide risk assessment instruments.	/pubmed/20418213	Kene-Allampalli P, Hovey JD, Meyer GJ, Mihura JL.	Crisis. 2010;31(2):76-85. doi: 10.1027/0227-5910/a000003.	Crisis. 2010	PubMed	citation	PMID:20418213	pubmed	20418213	create date:2010/04/27 | first author:Kene-Allampalli P
Science in court: DNA's identity crisis.	/pubmed/20237538	Gilbert N.	Nature. 2010 Mar 18;464(7287):347-8. doi: 10.1038/464347a. No abstract available.	Nature. 2010	PubMed	citation	PMID:20237538	pubmed	20237538	create date:2010/03/20 | first author:Gilbert N
A genome-wide screen identifies frequently methylated genes in haematological and epithelial cancers.	/pubmed/20184741	Dunwell T, Hesson L, Rauch TA, Wang L, Clark RE, Dallol A, Gentle D, Catchpoole D, Maher ER, Pfeifer GP, Latif F.	Mol Cancer. 2010 Feb 25;9:44. doi: 10.1186/1476-4598-9-44.	Mol Cancer. 2010	PubMed	citation	PMID:20184741 | PMCID:PMC2838813	pubmed	20184741	create date:2010/02/27 | first author:Dunwell T
Cross-cultural validation of the Resilience Scale for Adults (RSA) in Iran.	/pubmed/20149146	Jowkar B, Friborg O, Hjemdal O.	Scand J Psychol. 2010 Oct;51(5):418-25. doi: 10.1111/j.1467-9450.2009.00794.x.	Scand J Psychol. 2010	PubMed	citation	PMID:20149146	pubmed	20149146	create date:2010/02/13 | first author:Jowkar B
Simultaneous quantification of the organophosphorus pesticides dimethoate and omethoate in porcine plasma and urine by LC-ESI-MS/MS and flow-injection-ESI-MS/MS.	/pubmed/20106727	John H, Eddleston M, Clutton RE, Worek F, Thiermann H.	J Chromatogr B Analyt Technol Biomed Life Sci. 2010 May 15;878(17-18):1234-45. doi: 10.1016/j.jchromb.2010.01.003. Epub 2010 Jan 14.	J Chromatogr B Analyt Technol Biomed Life Sci. 2010	PubMed	citation	PMID:20106727	pubmed	20106727	create date:2010/01/29 | first author:John H
Virtual patient simulator for the perfusion resource management drill.	/pubmed/20092074	Ninomiya S, Tokaji M, Tokumine A, Kurosaki T.	J Extra Corpor Technol. 2009 Dec;41(4):206-12.	J Extra Corpor Technol. 2009	PubMed	citation	PMID:20092074 | PMCID:PMC4813543	pubmed	20092074	create date:2010/01/23 | first author:Ninomiya S
Measuring hopelessness and life orientation in Pakistani adolescents.	/pubmed/19767271	Ayub N.	Crisis. 2009;30(3):153-60. doi: 10.1027/0227-5910.30.3.153.	Crisis. 2009	PubMed	citation	PMID:19767271	pubmed	19767271	create date:2009/09/22 | first author:Ayub N
Severity of attempted suicide as measured by the Pierce Suicidal Intent Scale.	/pubmed/19767269	Sisask M, KÌµlves K, VÌ_rnik A.	Crisis. 2009;30(3):136-43. doi: 10.1027/0227-5910.30.3.136.	Crisis. 2009	PubMed	citation	PMID:19767269	pubmed	19767269	create date:2009/09/22 | first author:Sisask M
Evaluation of testing capabilities for the determination of melamine in milk through an interlaboratory proficiency test programme during the melamine crisis.	/pubmed/19724953	Chan M, Lo CK, Cheng LS, Cheung TC, Wong YC.	Food Addit Contam Part A Chem Anal Control Expo Risk Assess. 2009 Nov;26(11):1450-8. doi: 10.1080/02652030903173627.	Food Addit Contam Part A Chem Anal Control Expo Risk Assess. 2009	PubMed	citation	PMID:19724953	pubmed	19724953	create date:2009/09/03 | first author:Chan M
BIS values during resuscitation: the role of the suppression ratio (case report).	/pubmed/19697144	Declerck A, Liu N, Chazot T, Fischler M.	J Clin Monit Comput. 2009 Oct;23(5):307-9. doi: 10.1007/s10877-009-9197-5. Epub 2009 Aug 21.	J Clin Monit Comput. 2009	PubMed	citation	PMID:19697144	pubmed	19697144	create date:2009/08/22 | first author:Declerck A
Food insecurity among volunteer AIDS caregivers in Addis Ababa, Ethiopia was highly prevalent but buffered from the 2008 food crisis.	/pubmed/19640968	Maes KC, Hadley C, Tesfaye F, Shifferaw S, Tesfaye YA.	J Nutr. 2009 Sep;139(9):1758-64. doi: 10.3945/jn.109.108548. Epub 2009 Jul 29.	J Nutr. 2009	PubMed	citation	PMID:19640968	pubmed	19640968	create date:2009/07/31 | first author:Maes KC
An accurate and rapid flow cytometric diagnosis of BCR-ABL positive acute lymphoblastic leukemia.	/pubmed/19608682	Raponi S, De Propris MS, Wai H, Intoppa S, Elia L, Diverio D, Vitale A, FoÌÊ R, Guarini A.	Haematologica. 2009 Dec;94(12):1767-70. doi: 10.3324/haematol.2009.010900. Epub 2009 Jul 16.	Haematologica. 2009	PubMed	citation	PMID:19608682 | PMCID:PMC2791932	pubmed	19608682	create date:2009/07/18 | first author:Raponi S
Clinical evaluation of a new functional test for detection of plasma procoagulant phospholipids.	/pubmed/19593117	van Dreden P, Rousseau A, Fontaine S, Woodhams BJ, Exner T.	Blood Coagul Fibrinolysis. 2009 Oct;20(7):494-502. doi: 10.1097/MBC.0b013e32832c5e51.	Blood Coagul Fibrinolysis. 2009	PubMed	citation	PMID:19593117	pubmed	19593117	create date:2009/07/14 | first author:van Dreden P
Norwegian version of the Mini-International Neuropsychiatric Interview: feasibility, acceptability and test-retest reliability in an acute psychiatric ward.	/pubmed/19553089	Mordal J, Gundersen O, Bramness JG.	Eur Psychiatry. 2010 Apr;25(3):172-7. doi: 10.1016/j.eurpsy.2009.02.004. Epub 2009 Jun 23.	Eur Psychiatry. 2010	PubMed	citation	PMID:19553089	pubmed	19553089	create date:2009/06/26 | first author:Mordal J
Defense mechanisms associated with borderline personality disorder.	/pubmed/19379090	Zanarini MC, Weingeroff JL, Frankenburg FR.	J Pers Disord. 2009 Apr;23(2):113-21. doi: 10.1521/pedi.2009.23.2.113.	J Pers Disord. 2009	PubMed	citation	PMID:19379090 | PMCID:PMC3203733	pubmed	19379090	create date:2009/04/22 | first author:Zanarini MC
Chaotic behavior in an algorithm to escape from poor local minima in lens design.	/pubmed/19365468	van Turnhout M, Bociort F.	Opt Express. 2009 Apr 13;17(8):6436-50.	Opt Express. 2009	PubMed	citation	PMID:19365468	pubmed	19365468	create date:2009/04/15 | first author:van Turnhout M
Assessing behavioral coping preferences of psychiatric inpatients: a pilot study.	/pubmed/19242577	Hellerstein DJ, Seirmarco G, Almeida G, Batchelder S.	Medscape J Med. 2008;10(12):271. Epub 2008 Dec 2.	Medscape J Med. 2008	PubMed	citation	PMID:19242577 | PMCID:PMC2644003	pubmed	19242577	create date:2009/02/27 | first author:Hellerstein DJ
Health care provider attitudes toward patients with acute vaso-occlusive crisis due to sickle cell disease: development of a scale.	/pubmed/19233587	Ratanawongsa N, Haywood C Jr, Bediako SM, Lattimer L, Lanzkron S, Hill PM, Powe NR, Beach MC.	Patient Educ Couns. 2009 Aug;76(2):272-8. doi: 10.1016/j.pec.2009.01.007. Epub 2009 Feb 23.	Patient Educ Couns. 2009	PubMed	citation	PMID:19233587 | PMCID:PMC3119258	pubmed	19233587	create date:2009/02/24 | first author:Ratanawongsa N
Identity crisis.	/pubmed/19225471	[No authors listed]	Nature. 2009 Feb 19;457(7232):935-6. doi: 10.1038/457935b. No abstract available.	Nature. 2009	PubMed	citation	PMID:19225471	pubmed	19225471	create date:2009/02/20
A comparison of global rating scale and checklist scores in the validation of an evaluation tool to assess performance in the resuscitation of critically ill patients during simulated emergencies (abbreviated as "CRM simulator study IB").	/pubmed/19212245	Kim J, Neilipovitz D, Cardinal P, Chiu M.	Simul Healthc. 2009 Spring;4(1):6-16. doi: 10.1097/SIH.0b013e3181880472.	Simul Healthc. 2009	PubMed	citation	PMID:19212245	pubmed	19212245	create date:2009/02/13 | first author:Kim J
Seasoned surgeons assessed in a laparoscopic surgical crisis.	/pubmed/19190969	Powers K, Rehrig ST, Schwaitzberg SD, Callery MP, Jones DB.	J Gastrointest Surg. 2009 May;13(5):994-1003. doi: 10.1007/s11605-009-0802-1. Epub 2009 Feb 4.	J Gastrointest Surg. 2009	PubMed	citation	PMID:19190969	pubmed	19190969	create date:2009/02/05 | first author:Powers K
[Reliability and validity of the self-reporting questionnaire for assessing mental health applied in Wenchuan earthquake].	/pubmed/19176140	Hu JB, Huang ML, Huang WW, Hu SH, Wei N, Zhou WH, Xu Y.	Zhonghua Yu Fang Yi Xue Za Zhi. 2008 Nov;42(11):810-3. Chinese.	Zhonghua Yu Fang Yi Xue Za Zhi. 2008	PubMed	citation	PMID:19176140	pubmed	19176140	create date:2009/01/30 | first author:Hu JB
The negative prognostic impact of derivative 9 deletions in patients who received hydroxyurea treatment for chronic myelogenous leukemia in the chronic phase.	/pubmed/19145090	Li JY, Xu W, Wu W, Zhu Y, Qiu HR, Zhang R, Zhang SJ, Qian SX.	Onkologie. 2008 Nov;31(11):585-9. doi: 10.1159/000160578. Epub 2008 Oct 17.	Onkologie. 2008	PubMed	citation	PMID:19145090	pubmed	19145090	create date:2009/01/16 | first author:Li JY
Technical and non-technical skills can be reliably assessed during paramedic simulation training.	/pubmed/19032564	von Wyl T, Zuercher M, Amsler F, Walter B, Ummenhofer W.	Acta Anaesthesiol Scand. 2009 Jan;53(1):121-7. doi: 10.1111/j.1399-6576.2008.01797.x. Epub 2008 Nov 11.	Acta Anaesthesiol Scand. 2009	PubMed	citation	PMID:19032564	pubmed	19032564	create date:2008/11/27 | first author:von Wyl T
Psychometric testing of the Chinese version of nursing practice environment scale.	/pubmed/19017371	Chiang HY, Lin SY.	J Clin Nurs. 2009 Mar;18(6):919-29. doi: 10.1111/j.1365-2702.2008.02433.x. Epub 2008 Nov 12.	J Clin Nurs. 2009	PubMed	citation	PMID:19017371	pubmed	19017371	create date:2008/11/20 | first author:Chiang HY
Validation of the CALUX bioassay for PCDD/F analyses in human blood plasma and comparison with GC-HRMS.	/pubmed/18969545	Van Wouwe N, Windal I, Vanderperren H, Eppe G, Xhrouet C, Massart AC, Debacker N, Sasse A, Baeyens W, De Pauw E, Sartor F, Van Oyen H, Goeyens L.	Talanta. 2004 Aug 8;63(5):1157-67. doi: 10.1016/j.talanta.2004.05.028.	Talanta. 2004	PubMed	citation	PMID:18969545	pubmed	18969545	create date:2008/10/31 | first author:Van Wouwe N
The prevalence and incremental validity of identity problem symptoms in a high school sample.	/pubmed/18784912	Berman SL, Weems CF, Petkus VF.	Child Psychiatry Hum Dev. 2009 Jun;40(2):183-95. doi: 10.1007/s10578-008-0117-6. Epub 2008 Sep 11.	Child Psychiatry Hum Dev. 2009	PubMed	citation	PMID:18784912	pubmed	18784912	create date:2008/09/12 | first author:Berman SL
[Evolution of laparoscopic adrenal surgery in a general surgery department].	/pubmed/18358181	RodrÌ_guez Hermosa JI, Roig GarcÌ_a J, Font Pascual JA, Recasens Sala M, OrtuÌ±o Muro P, Pardina BadÌ_a B, Codina Cazador A.	Cir Esp. 2008 Apr;83(4):205-10. Spanish.	Cir Esp. 2008	PubMed	citation	PMID:18358181	pubmed	18358181	create date:2008/03/25 | first author:RodrÌ_guez Hermosa JI
Progress and limits of TSE diagnostic tools.	/pubmed/18284910	Grassi J, Maillet S, Simon S, Morel N.	Vet Res. 2008 Jul-Aug;39(4):33. doi: 10.1051/vetres:2008009. Epub 2008 Feb 15. Review.	Vet Res. 2008	PubMed	citation	PMID:18284910	pubmed	18284910	create date:2008/02/21 | first author:Grassi J
Suicide reporting content analysis: abstract development and reliability.	/pubmed/18265736	Gould MS, Midle JB, Insel B, Kleinman M.	Crisis. 2007;28(4):165-74.	Crisis. 2007	PubMed	citation	PMID:18265736	pubmed	18265736	create date:2008/02/13 | first author:Gould MS
[The crisis of the operational diagnostic approach in psychiatry].	/pubmed/18259722	JÌ_ger M, Frasch K, Becker T.	Nervenarzt. 2008 Mar;79(3):288-94. doi: 10.1007/s00115-008-2418-1. Review. German.	Nervenarzt. 2008	PubMed	citation	PMID:18259722	pubmed	18259722	create date:2008/02/09 | first author:JÌ_ger M
Simulated laparoscopic operating room crisis: An approach to enhance the surgical team performance.	/pubmed/18071813	Powers KA, Rehrig ST, Irias N, Albano HA, Malinow A, Jones SB, Moorman DW, Pawlowski JB, Jones DB.	Surg Endosc. 2008 Apr;22(4):885-900. Epub 2007 Dec 11.	Surg Endosc. 2008	PubMed	citation	PMID:18071813	pubmed	18071813	create date:2007/12/12 | first author:Powers KA
[Retrospective census of cancers between 1994 and 2002 around the municipal solid waste incinerator of Gilly-sur-IsÌ¬re].	/pubmed/18055149	Thabuis A, Schmitt M, Megas F, Fabres B.	Rev Epidemiol Sante Publique. 2007 Dec;55(6):426-32. Epub 2007 Dec 4. French.	Rev Epidemiol Sante Publique. 2007	PubMed	citation	PMID:18055149	pubmed	18055149	create date:2007/12/07 | first author:Thabuis A
Morbidity prevalence rate of kawasaki disease assessed by single cross-sectional history-taking.	/pubmed/17998771	Tsuji T, Suzuki J, Shimamoto R, Yamazaki T, Ohomoto Y, Iwasawa K, Nagai R.	Int Heart J. 2007 Sep;48(5):615-21.	Int Heart J. 2007	PubMed	citation	PMID:17998771	pubmed	17998771	create date:2007/11/14 | first author:Tsuji T
Design for sustainable development--household drinking water filter for arsenic and pathogen treatment in Nepal.	/pubmed/17952789	Ngai TK, Shrestha RR, Dangol B, Maharjan M, Murcott SE.	J Environ Sci Health A Tox Hazard Subst Environ Eng. 2007 Oct;42(12):1879-88.	J Environ Sci Health A Tox Hazard Subst Environ Eng. 2007	PubMed	citation	PMID:17952789	pubmed	17952789	create date:2007/10/24 | first author:Ngai TK
[Screening domestic violence. A German-language screening instrument for domestic violence against women].	/pubmed/17647149	Nyberg E, Hartman P, Stieglitz R, Riecher-RÌ¦ssler A.	Fortschr Neurol Psychiatr. 2008 Jan;76(1):28-36. Epub 2007 Jul 24. German.	Fortschr Neurol Psychiatr. 2008	PubMed	citation	PMID:17647149	pubmed	17647149	create date:2007/07/25 | first author:Nyberg E
Barriers to working with sexual assault survivors: a qualitative study of rape crisis center workers.	/pubmed/17420518	Ullman SE, Townsend SM.	Violence Against Women. 2007 Apr;13(4):412-43.	Violence Against Women. 2007	PubMed	citation	PMID:17420518	pubmed	17420518	create date:2007/04/11 | first author:Ullman SE
Funduscopic examination has limited benefit for management of hypertension.	/pubmed/17409584	Helvaci MR, Ozcura F, Kaya H, Yalcin A.	Int Heart J. 2007 Mar;48(2):187-94.	Int Heart J. 2007	PubMed	citation	PMID:17409584	pubmed	17409584	create date:2007/04/06 | first author:Helvaci MR
Assessing knowledge of schizophrenia: development and psychometric properties of a brief, multiple-choice knowledge test for use across various samples.	/pubmed/17379321	Compton MT, Quintero L, Esterberg ML.	Psychiatry Res. 2007 May 30;151(1-2):87-95. Epub 2007 Mar 26.	Psychiatry Res. 2007	PubMed	citation	PMID:17379321	pubmed	17379321	create date:2007/03/24 | first author:Compton MT
Assessing obsessive compulsive symptoms and cognitions on the internet: evidence for the comparability of paper and Internet administration.	/pubmed/17306222	Coles ME, Cook LM, Blake TR.	Behav Res Ther. 2007 Sep;45(9):2232-40. Epub 2007 Jan 12.	Behav Res Ther. 2007	PubMed	citation	PMID:17306222	pubmed	17306222	create date:2007/02/20 | first author:Coles ME
An early warning system for overcrowding in the emergency department.	/pubmed/17238359	Hoot N, Aronsky D.	AMIA Annu Symp Proc. 2006:339-43.	AMIA Annu Symp Proc. 2006	PubMed	citation	PMID:17238359 | PMCID:PMC1839284	pubmed	17238359	create date:2007/01/24 | first author:Hoot N
Optimization of discriminant partial least squares regression models for the detection of animal by-product meals in compound feedingstuffs by near-infrared spectroscopy.	/pubmed/17217593	PÌ©rez-MarÌ_n DC, Garrido-Varo A, Guerrero JE.	Appl Spectrosc. 2006 Dec;60(12):1432-7.	Appl Spectrosc. 2006	PubMed	citation	PMID:17217593	pubmed	17217593	create date:2007/01/16 | first author:PÌ©rez-MarÌ_n DC
Palaeontology: embryonic identity crisis.	/pubmed/17183264	Donoghue PC.	Nature. 2007 Jan 11;445(7124):155-6. No abstract available.	Nature. 2007	PubMed	citation	PMID:17183264	pubmed	17183264	create date:2006/12/22 | first author:Donoghue PC
LC-MS-(TOF) analysis method for benzodiazepines in urine samples from alleged drug-facilitated sexual assault victims.	/pubmed/17132247	ElSohly MA, Gul W, ElSohly KM, Avula B, Khan IA.	J Anal Toxicol. 2006 Oct;30(8):524-38.	J Anal Toxicol. 2006	PubMed	citation	PMID:17132247	pubmed	17132247	create date:2006/11/30 | first author:ElSohly MA
The validation process of incorporating simulation-based accreditation into the anesthesiology Israeli national board exams.	/pubmed/17125130	Berkenstadt H, Ziv A, Gafni N, Sidi A.	Isr Med Assoc J. 2006 Oct;8(10):728-33.	Isr Med Assoc J. 2006	PubMed	citation	PMID:17125130	pubmed	17125130	create date:2006/11/28 | first author:Berkenstadt H
A psychometric analysis of Project Liberty's adult enhanced services referral tool.	/pubmed/16968766	Norris FH, Donahue SA, Felton CJ, Watson PJ, Hamblen JL, Marshall RD.	Psychiatr Serv. 2006 Sep;57(9):1328-34.	Psychiatr Serv. 2006	PubMed	citation	PMID:16968766	pubmed	16968766	create date:2006/09/14 | first author:Norris FH
[Headache and transformed migraine with medication overuse: what differences between disability, emotional distress and coping?].	/pubmed/16910624	Lafittau M, Radat F, Irachabal S, Creac'h C.	Encephale. 2006 Mar-Apr;32(2 Pt 1):231-7. French.	Encephale. 2006	PubMed	citation	PMID:16910624	pubmed	16910624	create date:2006/08/17 | first author:Lafittau M
[Video-electroencephalography prolonged monitoring in patients with ambulatory diagnosis of medically refractory temporal lobe epilepsy: application of fuzzy logic's model].	/pubmed/16807866	Cosenza-Andraus ME, Nunes-Cosenza CA, Gomes-Nunes R, Fantezia-Andraus C, Alves-Leon SV.	Rev Neurol. 2006 Jul 1-15;43(1):7-14. Spanish.	Rev Neurol. 2006	PubMed	citation	PMID:16807866	pubmed	16807866	create date:2006/06/30 | first author:Cosenza-Andraus ME
A pilot study using high-fidelity simulation to formally evaluate performance in the resuscitation of critically ill patients: The University of Ottawa Critical Care Medicine, High-Fidelity Simulation, and Crisis Resource Management I Study.	/pubmed/16775567	Kim J, Neilipovitz D, Cardinal P, Chiu M, Clinch J.	Crit Care Med. 2006 Aug;34(8):2167-74.	Crit Care Med. 2006	PubMed	citation	PMID:16775567	pubmed	16775567	create date:2006/06/16 | first author:Kim J
Reliability and validity of the Spanish Version of the Crisis in Family Systems-Revised.	/pubmed/16673963	Berry CA, Quinn KA, Portillo N, Shalowitz MU.	Psychol Rep. 2006 Feb;98(1):123-32.	Psychol Rep. 2006	PubMed	citation	PMID:16673963	pubmed	16673963	create date:2006/05/06 | first author:Berry CA
Genotyping of Bacillus anthracis strains based on automated capillary 25-loci multiple locus variable-number tandem repeats analysis.	/pubmed/16600037	Lista F, Faggioni G, Valjevac S, Ciammaruconi A, Vaissaire J, le Doujet C, GorgÌ© O, De Santis R, Carattoli A, Ciervo A, Fasanella A, Orsini F, D'Amelio R, Pourcel C, Cassone A, Vergnaud G.	BMC Microbiol. 2006 Apr 6;6:33.	BMC Microbiol. 2006	PubMed	citation	PMID:16600037 | PMCID:PMC1479350	pubmed	16600037	create date:2006/04/08 | first author:Lista F
Meta-Jeopardy": the crisis of representation in qualitative metasynthesis.	/pubmed/16487774	Sandelowski M.	Nurs Outlook. 2006 Jan-Feb;54(1):10-6. Review. No abstract available.	Nurs Outlook. 2006	PubMed	citation	PMID:16487774	pubmed	16487774	create date:2006/02/21 | first author:Sandelowski M
Qualitative and quantitative evaluation of equine respiratory mechanics by impulse oscillometry.	/pubmed/16411587	Van Erck E, Votion D, Art T, Lekeux P.	Equine Vet J. 2006 Jan;38(1):52-8.	Equine Vet J. 2006	PubMed	citation	PMID:16411587	pubmed	16411587	create date:2006/01/18 | first author:Van Erck E
The clinical strategies implementation scale to measure implementation of treatment in mental health services.	/pubmed/16339622	Falloon IR, Economou M, Palli A, Malm U, Mizuno M, Murakami M; Optimal Treatment Project Collaborative Group..	Psychiatr Serv. 2005 Dec;56(12):1584-90.	Psychiatr Serv. 2005	PubMed	citation	PMID:16339622	pubmed	16339622	create date:2005/12/13 | first author:Falloon IR
Effects of long-term benzodiazepine medication. A prospective cohort study: methodological and clinical aspects.	/pubmed/16316903	NystrÌ¦m C.	Nord J Psychiatry. 2005;59(6):492-7.	Nord J Psychiatry. 2005	PubMed	citation	PMID:16316903	pubmed	16316903	create date:2005/12/01 | first author:NystrÌ¦m C
The incidence of S. aureus bacteraemia in acute hospitals of the Mid-Western Area, Ireland, 2002-2004.	/pubmed/16077206	Whyte D, Monahan R, Boyle L, Slevin B, FitzGerald R, Barron D, De Freitas J, Kelleher K.	Euro Surveill. 2005 May;10(5):75-7.	Euro Surveill. 2005	PubMed	citation	PMID:16077206	pubmed	16077206	create date:2005/08/04 | first author:Whyte D
Cognitive characteristics of patients with borderline personality disorder: development and validation of a self-report inventory.	/pubmed/15950176	Renneberg B, Schmidt-Rathjens C, Hippin R, Backenstrass M, Fydrich T.	J Behav Ther Exp Psychiatry. 2005 Sep;36(3):173-82.	J Behav Ther Exp Psychiatry. 2005	PubMed	citation	PMID:15950176	pubmed	15950176	create date:2005/06/14 | first author:Renneberg B
Error and objectivity: cognitive illusions and qualitative research.	/pubmed/15935085	Paley J.	Nurs Philos. 2005 Jul;6(3):196-209.	Nurs Philos. 2005	PubMed	citation	PMID:15935085	pubmed	15935085	create date:2005/06/07 | first author:Paley J
The asthma belief survey: development and testing.	/pubmed/15916316	Velsor-Friedrich B, Pigott TD, Srof B, Froman R.	J Nurs Meas. 2004 Spring-Summer;12(1):7-19.	J Nurs Meas. 2004	PubMed	citation	PMID:15916316	pubmed	15916316	create date:2005/05/27 | first author:Velsor-Friedrich B
Interpretation of submicroscopic deletions of the BCR or ABL gene should not depend on extra signal-FISH: problems in interpretation of submicroscopic deletion of the BCR or ABL gene with extra signal-FISH.	/pubmed/15723338	Kim YR, Cho HI, Yoon SS, Park S, Kim BK, Lee YK, Chun H, Kim HC, Lee DS.	Genes Chromosomes Cancer. 2005 May;43(1):37-44.	Genes Chromosomes Cancer. 2005	PubMed	citation	PMID:15723338	pubmed	15723338	create date:2005/02/22 | first author:Kim YR
Metabolic crisis without brain ischemia is common after traumatic brain injury: a combined microdialysis and positron emission tomography study.	/pubmed/15716852	Vespa P, Bergsneider M, Hattori N, Wu HM, Huang SC, Martin NA, Glenn TC, McArthur DL, Hovda DA.	J Cereb Blood Flow Metab. 2005 Jun;25(6):763-74.	J Cereb Blood Flow Metab. 2005	PubMed	citation	PMID:15716852 | PMCID:PMC4347944	pubmed	15716852	create date:2005/02/18 | first author:Vespa P
Reproducible measurements of AML blast p-glycoprotein function in 2 center analyses.	/pubmed/15659619	Pallis M, Fisher J, Truran L, Grundy M, Russell N, Burnett A.	Blood. 2005 Feb 1;105(3):1367-8. No abstract available.	Blood. 2005	PubMed	citation	PMID:15659619	pubmed	15659619	create date:2005/01/22 | first author:Pallis M
Assessing ambiguity at the family-nurse boundary interface in pediatric health crisis.	/pubmed/15637581	Tomlinson PS, Harbaugh BL.	J Pediatr Nurs. 2004 Dec;19(6):399-410.	J Pediatr Nurs. 2004	PubMed	citation	PMID:15637581	pubmed	15637581	create date:2005/01/08 | first author:Tomlinson PS
Psychometric evaluation of the Cognitive Appraisal of Health Scale with patients with prostate cancer.	/pubmed/15610384	Ahmad MM.	J Adv Nurs. 2005 Jan;49(1):78-86.	J Adv Nurs. 2005	PubMed	citation	PMID:15610384	pubmed	15610384	create date:2004/12/22 | first author:Ahmad MM
Relationship of sports experience and ego development of adolescent Japanese athletes.	/pubmed/15460354	Takenouchi T, Taguchi T, Okuda A.	Psychol Rep. 2004 Aug;95(1):13-26.	Psychol Rep. 2004	PubMed	citation	PMID:15460354	pubmed	15460354	create date:2004/10/06 | first author:Takenouchi T
Use of fecal glucocorticoid metabolite measures in conservation biology research: considerations for application and interpretation.	/pubmed/15364201	Millspaugh JJ, Washburn BE.	Gen Comp Endocrinol. 2004 Sep 15;138(3):189-99. Review.	Gen Comp Endocrinol. 2004	PubMed	citation	PMID:15364201	pubmed	15364201	create date:2004/09/15 | first author:Millspaugh JJ
Residents lack knowledge and practical skills in handling the difficult airway.	/pubmed/15315620	Rosenstock C, Ì÷stergaard D, Kristensen MS, Lippert A, Ruhnau B, Rasmussen LS.	Acta Anaesthesiol Scand. 2004 Sep;48(8):1014-8.	Acta Anaesthesiol Scand. 2004	PubMed	citation	PMID:15315620	pubmed	15315620	create date:2004/08/19 | first author:Rosenstock C
[Detection of abnormal numbers of chromosome 8 with interphase fluorescence in situ hybridization in hematologic malignancies].	/pubmed/15300644	Wang HP, Li GX, Qiao ZH, Wang HW.	Zhonghua Yi Xue Yi Chuan Xue Za Zhi. 2004 Aug;21(4):395-7. Chinese.	Zhonghua Yi Xue Yi Chuan Xue Za Zhi. 2004	PubMed	citation	PMID:15300644	pubmed	15300644	create date:2004/08/10 | first author:Wang HP
The utility of screening laboratory studies in pediatric patients with sickle cell pain episodes.	/pubmed/15258863	Chapman JI, El-Shammaa EN, Bonsu BK.	Am J Emerg Med. 2004 Jul;22(4):258-63.	Am J Emerg Med. 2004	PubMed	citation	PMID:15258863	pubmed	15258863	create date:2004/07/20 | first author:Chapman JI
Measurement of respiratory function by impulse oscillometry in horses.	/pubmed/14756367	van Erck E, Votion D, Art T, Lekeux P.	Equine Vet J. 2004 Jan;36(1):21-8.	Equine Vet J. 2004	PubMed	citation	PMID:14756367	pubmed	14756367	create date:2004/02/06 | first author:van Erck E
A critical pathway for intimate partner violence across the continuum of care.	/pubmed/14565738	Dienemann J, Campbell J, Wiederhorn N, Laughon K, Jordan E.	J Obstet Gynecol Neonatal Nurs. 2003 Sep-Oct;32(5):594-603.	J Obstet Gynecol Neonatal Nurs. 2003	PubMed	citation	PMID:14565738	pubmed	14565738	create date:2003/10/21 | first author:Dienemann J
Development and validation of a new index to measure emergency department crowding.	/pubmed/12957975	Bernstein SL, Verghese V, Leung W, Lunney AT, Perez I.	Acad Emerg Med. 2003 Sep;10(9):938-42.	Acad Emerg Med. 2003	PubMed	citation	PMID:12957975	pubmed	12957975	create date:2003/09/06 | first author:Bernstein SL
Differential counting of blood leukocytes using automated microscopy and a decision support system based on artificial neural networks--evaluation of DiffMaster Octavia.	/pubmed/12755789	Swolin B, Simonsson P, Backman S, LÌ¦fqvist I, Bredin I, Johnsson M.	Clin Lab Haematol. 2003 Jun;25(3):139-47.	Clin Lab Haematol. 2003	PubMed	citation	PMID:12755789	pubmed	12755789	create date:2003/05/21 | first author:Swolin B
[Ammonia and ammonium salts: remedy and poison, myth and time honored reality].	/pubmed/12754883	Finkelstein Y, Shnaider H, Wormser U.	Harefuah. 2003 Apr;142(4):301-3, 316. Review. Hebrew.	Harefuah. 2003	PubMed	citation	PMID:12754883	pubmed	12754883	create date:2003/05/21 | first author:Finkelstein Y
Crisis and its assessment after brain injury.	/pubmed/12745709	Davis JR, Gemeinhardt M, Gan C, Anstey K, Gargaro J.	Brain Inj. 2003 May;17(5):359-76.	Brain Inj. 2003	PubMed	citation	PMID:12745709	pubmed	12745709	create date:2003/05/15 | first author:Davis JR
The scientific study of suicide requires accurate data.	/pubmed/12542112	Lester D.	Crisis. 2002;23(3):133-4. No abstract available.	Crisis. 2002	PubMed	citation	PMID:12542112	pubmed	12542112	create date:2003/01/25 | first author:Lester D
[Meeting women with chronic pain. "Health barometer" provides support for constructive dialogue].	/pubmed/12522987	Brattberg G.	Lakartidningen. 2002 Dec 5;99(49):4974-80. Swedish.	Lakartidningen. 2002	PubMed	citation	PMID:12522987	pubmed	12522987	create date:2003/01/14 | first author:Brattberg G
Evaluation of high fidelity patient simulator in assessment of performance of anaesthetists.	/pubmed/12488377	Weller JM, Bloch M, Young S, Maze M, Oyesola S, Wyner J, Dob D, Haire K, Durbridge J, Walker T, Newble D.	Br J Anaesth. 2003 Jan;90(1):43-7.	Br J Anaesth. 2003	PubMed	citation	PMID:12488377	pubmed	12488377	create date:2002/12/19 | first author:Weller JM
Mortality patterns in the Russian Federation: indirect technique using widowhood data.	/pubmed/12481209	Bobak M, Murphy M, Pikhart H, Martikainen P, Rose R, Marmot M.	Bull World Health Organ. 2002;80(11):876-81. Epub 2002 Dec 3.	Bull World Health Organ. 2002	PubMed	citation	PMID:12481209 | PMCID:PMC2567680	pubmed	12481209	create date:2002/12/14 | first author:Bobak M
Multidrug-resistant MCF-7 cells: an identity crisis?	/pubmed/12419794	Mehta K, Devarajan E, Chen J, Multani A, Pathak S.	J Natl Cancer Inst. 2002 Nov 6;94(21):1652-4; author reply 1654. No abstract available.	J Natl Cancer Inst. 2002	PubMed	citation	PMID:12419794	pubmed	12419794	create date:2002/11/07 | first author:Mehta K
Validity of the General Health Questionnaire (GHQ-28) in a prison population: data from a randomized sample of prisoners on remand.	/pubmed/12414023	Andersen HS, Sestoft D, Lillebaek T, Gabrielsen G, Hemmingsen R.	Int J Law Psychiatry. 2002 Nov-Dec;25(6):573-80. No abstract available.	Int J Law Psychiatry. 2002	PubMed	citation	PMID:12414023	pubmed	12414023	create date:2002/11/05 | first author:Andersen HS
High reliability of neonatal screening for congenital adrenal hyperplasia in Switzerland.	/pubmed/12213856	Steigert M, Schoenle EJ, Biason-Lauber A, Torresani T.	J Clin Endocrinol Metab. 2002 Sep;87(9):4106-10.	J Clin Endocrinol Metab. 2002	PubMed	citation	PMID:12213856	pubmed	12213856	create date:2002/09/06 | first author:Steigert M
High-throughput capillary gas chromatography for the determination of polychlorinated biphenyls and fatty acid methyl esters in food samples.	/pubmed/12049154	Sandra P, David F.	J Chromatogr Sci. 2002 May-Jun;40(5):248-53.	J Chromatogr Sci. 2002	PubMed	citation	PMID:12049154	pubmed	12049154	create date:2002/06/07 | first author:Sandra P
Validity of the depression coping self-efficacy scale.	/pubmed/12037798	Tucker S, Brust S, Richardson B.	Arch Psychiatr Nurs. 2002 Jun;16(3):125-33.	Arch Psychiatr Nurs. 2002	PubMed	citation	PMID:12037798	pubmed	12037798	create date:2002/05/31 | first author:Tucker S
Use of measurement audit in outcomes management.	/pubmed/11840906	Lyons JS, Rawal P, Yeh I, Leon SC, Tracy P.	J Behav Health Serv Res. 2002 Feb;29(1):75-80.	J Behav Health Serv Res. 2002	PubMed	citation	PMID:11840906	pubmed	11840906	create date:2002/02/14 | first author:Lyons JS
Validation of the Crisis in Family Systems-Revised, a contemporary measure of life stressors.	/pubmed/11508009	Berry C, Shalowitz M, Quinn K, Wolf R.	Psychol Rep. 2001 Jun;88(3 Pt 1):713-24.	Psychol Rep. 2001	PubMed	citation	PMID:11508009	pubmed	11508009	create date:2001/08/18 | first author:Berry C
Symptom endorsement differences on the Children's Depression Inventory with children and adolescents on an inpatient unit.	/pubmed/11499454	Liss H, Phares V, Liljequist L.	J Pers Assess. 2001 Jun;76(3):396-411.	J Pers Assess. 2001	PubMed	citation	PMID:11499454	pubmed	11499454	create date:2001/08/14 | first author:Liss H
BCR rearrangement-negative chronic myelogenous leukemia revisited.	/pubmed/11387365	Kurzrock R, Bueso-Ramos CE, Kantarjian H, Freireich E, Tucker SL, Siciliano M, Pilat S, Talpaz M.	J Clin Oncol. 2001 Jun 1;19(11):2915-26.	J Clin Oncol. 2001	PubMed	citation	PMID:11387365	pubmed	11387365	create date:2001/06/02 | first author:Kurzrock R
Real-time quantitative reverse transcription-polymerase chain reaction for the detection of AML1-MTG8 fusion transcripts in t(8;21)-positive acute myelogenous leukemia.	/pubmed/11086178	Kondo M, Kudo K, Kimura H, Inaba J, Kato K, Kojima S, Matsuyama T, Horibe K.	Leuk Res. 2000 Nov;24(11):951-6.	Leuk Res. 2000	PubMed	citation	PMID:11086178	pubmed	11086178	create date:2000/11/22 | first author:Kondo M
Severe organ involvement in systemic sclerosis with diffuse scleroderma.	/pubmed/11083266	Steen VD, Medsger TA Jr.	Arthritis Rheum. 2000 Nov;43(11):2437-44.	Arthritis Rheum. 2000	PubMed	citation	PMID:11083266	pubmed	11083266	create date:2000/11/18 | first author:Steen VD
[Narcissistic crisis and prediction of post-partum depression: validation of a self-report questionnaire].	/pubmed/10951905	Dethieux JB, Abadie I, Grandjean H, Raynaud JP.	Encephale. 2000 May-Jun;26(3):44-52. French.	Encephale. 2000	PubMed	citation	PMID:10951905	pubmed	10951905	create date:2000/08/22 | first author:Dethieux JB
How reliable are selected scales from population-based health surveys? An analysis among seniors.	/pubmed/10910569	Raina P, Bonnett B, Waltner-Toews D, Woodward C, Abernathy T.	Can J Public Health. 1999 Jan-Feb;90(1):60-4.	Can J Public Health. 1999	PubMed	citation	PMID:10910569	pubmed	10910569	create date:2000/07/27 | first author:Raina P
Never the Twain shall meet? Closing the gap between coping research and clinical intervention research.	/pubmed/10892208	Coyne JC, Racioppo MW.	Am Psychol. 2000 Jun;55(6):655-64. Review.	Am Psychol. 2000	PubMed	citation	PMID:10892208	pubmed	10892208	create date:2000/07/13 | first author:Coyne JC
The ECB renal patient questionnaire: an assessment tool to determine renal patients' needs for immediate social work intervention.	/pubmed/10782737	Calder AE, Banning J.	Adv Ren Replace Ther. 2000 Apr;7(2):184-91. Review.	Adv Ren Replace Ther. 2000	PubMed	citation	PMID:10782737	pubmed	10782737	create date:2000/04/27 | first author:Calder AE
Interrater reliability of the Brief Psychiatric Rating Scale used at a community-based inpatient crisis stabilization unit.	/pubmed/10775051	Ligon J, Thyer BA.	J Clin Psychol. 2000 Apr;56(4):583-7.	J Clin Psychol. 2000	PubMed	citation	PMID:10775051	pubmed	10775051	create date:2000/04/25 | first author:Ligon J
[Personality disorders in adolescence. A pilot study on classification and early course].	/pubmed/10746294	Braun-Scharm H, Kieninger S, Wienecke S.	Z Kinder Jugendpsychiatr Psychother. 2000 Feb;28(1):5-15. German.	Z Kinder Jugendpsychiatr Psychother. 2000	PubMed	citation	PMID:10746294	pubmed	10746294	create date:2000/04/04 | first author:Braun-Scharm H
Identity disturbance in borderline personality disorder: an empirical investigation.	/pubmed/10739411	Wilkinson-Ryan T, Westen D.	Am J Psychiatry. 2000 Apr;157(4):528-41.	Am J Psychiatry. 2000	PubMed	citation	PMID:10739411	pubmed	10739411	create date:2000/03/30 | first author:Wilkinson-Ryan T
Psychometric properties of the state-trait anxiety inventory for Asian/Pacific-islander adolescents.	/pubmed/10668003	Hishinuma ES, Miyamoto RH, Nishimura ST, Nahulu LB, Andrade NN, Makini GK Jr, Yuen NY, Johnson RC, Kim SP, Goebert DA, Guerrero AP.	Assessment. 2000 Mar;7(1):17-36.	Assessment. 2000	PubMed	citation	PMID:10668003	pubmed	10668003	create date:2000/02/11 | first author:Hishinuma ES
Differentiation between senescence (M1) and crisis (M2) in human fibroblast cultures.	/pubmed/10585275	Wei W, Sedivy JM.	Exp Cell Res. 1999 Dec 15;253(2):519-22.	Exp Cell Res. 1999	PubMed	citation	PMID:10585275	pubmed	10585275	create date:1999/12/10 | first author:Wei W
Absolute levels of MDR-1, MRP, and BCL-2 MRNA and tumor remission in acute leukemia.	/pubmed/10500792	KÌ¦hler T, Leiblein S, Borchert S, Eller J, Rost AK, Lassner D, Krahl R, Helbig W, Wagner O, Remke H.	Adv Exp Med Biol. 1999;457:177-85.	Adv Exp Med Biol. 1999	PubMed	citation	PMID:10500792	pubmed	10500792	create date:1999/09/29 | first author:KÌ¦hler T
Reproducible flow cytometric methodology for measuring multidrug resistance in leukaemic blasts.	/pubmed/10500783	Pallis M, Turzanski J, Langabeer S, Russell NH.	Adv Exp Med Biol. 1999;457:77-88.	Adv Exp Med Biol. 1999	PubMed	citation	PMID:10500783	pubmed	10500783	create date:1999/09/29 | first author:Pallis M
[Anesthesia simulators: benefits and limits of experience gained at several European university hospitals].	/pubmed/10486633	Gouvitsos F, Vallet B, Scherpereel P.	Ann Fr Anesth Reanim. 1999 Aug;18(7):787-95. French.	Ann Fr Anesth Reanim. 1999	PubMed	citation	PMID:10486633	pubmed	10486633	create date:1999/09/16 | first author:Gouvitsos F
Bovine serum: reducing the variables through the use of donor herds.	/pubmed/10404879	Rolleston WB.	Dev Biol Stand. 1999;99:79-86. Review.	Dev Biol Stand. 1999	PubMed	citation	PMID:10404879	pubmed	10404879	create date:1999/07/15 | first author:Rolleston WB
Accuracy of pulse oximetry in sickle cell disease.	/pubmed/9927356	Ortiz FO, Aldrich TK, Nagel RL, Benjamin LJ.	Am J Respir Crit Care Med. 1999 Feb;159(2):447-51.	Am J Respir Crit Care Med. 1999	PubMed	citation	PMID:9927356	pubmed	9927356	create date:1999/02/02 | first author:Ortiz FO
Latent structure analysis of DSM-IV borderline personality disorder criteria.	/pubmed/9924881	Fossati A, Maffei C, Bagnato M, Donati D, Namia C, Novella L.	Compr Psychiatry. 1999 Jan-Feb;40(1):72-9.	Compr Psychiatry. 1999	PubMed	citation	PMID:9924881	pubmed	9924881	create date:1999/01/30 | first author:Fossati A
Efficient and rapid induction of a chronic myelogenous leukemia-like myeloproliferative disease in mice receiving P210 bcr/abl-transduced bone marrow.	/pubmed/9808572	Pear WS, Miller JP, Xu L, Pui JC, Soffer B, Quackenbush RC, Pendergast AM, Bronson R, Aster JC, Scott ML, Baltimore D.	Blood. 1998 Nov 15;92(10):3780-92.	Blood. 1998	PubMed	citation	PMID:9808572	pubmed	9808572	create date:1998/11/10 | first author:Pear WS
Suicide, euthanasia and AIDS.	/pubmed/9785650	Mishara BL.	Crisis. 1998;19(2):87-96. Review.	Crisis. 1998	PubMed	citation	PMID:9785650	pubmed	9785650	create date:1998/10/24 | first author:Mishara BL
Innovative community services for rape victims: an application of multiple case study methodology.	/pubmed/9772731	Campbell R, Ahrens CE.	Am J Community Psychol. 1998 Aug;26(4):537-71.	Am J Community Psychol. 1998	PubMed	citation	PMID:9772731	pubmed	9772731	create date:1998/10/17 | first author:Campbell R
[Prognostic value and accuracy of crisis indicators in severe asthma].	/pubmed/9575120	Bonillo Perales A, Romero GonzÌÁlez J, Picazo AngelÌ_n B, Tapia Ceballos L, Romero SÌÁnchez J, MartÌ_nez MarÌ_n MI.	An Esp Pediatr. 1997 Dec;47(6):606-10. Spanish.	An Esp Pediatr. 1997	PubMed	citation	PMID:9575120	pubmed	9575120	create date:1998/05/09 | first author:Bonillo Perales A
Red flags and religious coping: identifying some religious warning signs among people in crisis.	/pubmed/9476711	Pargament KI, Zinnbauer BJ, Scott AB, Butter EM, Zerowin J, Stanik P.	J Clin Psychol. 1998 Jan;54(1):77-89.	J Clin Psychol. 1998	PubMed	citation	PMID:9476711	pubmed	9476711	create date:1998/02/26 | first author:Pargament KI
Predicting psychiatric emergency admissions and hospital outcome.	/pubmed/9268252	Lyons JS, Stutesman J, Neme J, Vessey JT, O'Mahoney MT, Camper HJ.	Med Care. 1997 Aug;35(8):792-800.	Med Care. 1997	PubMed	citation	PMID:9268252	pubmed	9268252	create date:1997/08/01 | first author:Lyons JS
[Observing and nursing of the blood circulation for the free flap].	/pubmed/9384039	Lu H.	Zhonghua Hu Li Za Zhi. 1997 Jul;32(7):380-2. Chinese.	Zhonghua Hu Li Za Zhi. 1997	PubMed	citation	PMID:9384039	pubmed	9384039	create date:1997/07/01 | first author:Lu H
Physical disability construct convergence across instruments: towards a universal metric.	/pubmed/9661716	Fisher WP Jr.	J Outcome Meas. 1997;1(2):87-113.	J Outcome Meas. 1997	PubMed	citation	PMID:9661716	pubmed	9661716	create date:1997/01/01 | first author:Fisher WP Jr
Short-term outcome following referral to a psychiatric emergency service.	/pubmed/9286131	Spooren D, van Heeringen K, Jannes C.	Crisis. 1997;18(2):80-5.	Crisis. 1997	PubMed	citation	PMID:9286131	pubmed	9286131	create date:1997/01/01 | first author:Spooren D
Accuracy of immunohistochemistry and flow cytometry in estimating the proportion of leukemic cells in S phase in chronic myeloid leukemia patients.	/pubmed/8882956	Hegde U, Kotelnikov VM, Handa H, Burke P, Preisler HD.	Leuk Lymphoma. 1996 Aug;22(5-6):431-7.	Leuk Lymphoma. 1996	PubMed	citation	PMID:8882956	pubmed	8882956	create date:1996/08/01 | first author:Hegde U
Unwanted pregnancy: it's existing solutions from the perspective of young adults in Bangkok and the Abortion Law.	/pubmed/9009603	Prajayyothin P, Dhamprapha R.	Med Law. 1996;15(3):519-27.	Med Law. 1996	PubMed	citation	PMID:9009603	pubmed	9009603	create date:1996/01/01 | first author:Prajayyothin P
Evaluation of pulse oximetry in sickle cell anemia patients presenting to the emergency department in acute vasoocclusive crisis.	/pubmed/8630147	Comber JT, Lopez BL.	Am J Emerg Med. 1996 Jan;14(1):16-8.	Am J Emerg Med. 1996	PubMed	citation	PMID:8630147	pubmed	8630147	create date:1996/01/01 | first author:Comber JT
[The trends by province of tuberculosis in Cuba: 1979-1993].	/pubmed/8540995	GonzÌÁlez Ochoa E, Armas PÌ©rez L, MachÌ_n Gelaber A.	Bol Oficina Sanit Panam. 1995 Nov;119(5):396-404. Spanish.	Bol Oficina Sanit Panam. 1995	PubMed	citation	PMID:8540995	pubmed	8540995	create date:1995/11/01 | first author:GonzÌÁlez Ochoa E
Assessing filial maturity through the use of the Filial Anxiety Scale.	/pubmed/7473303	Murray PD, Lowe JD, Horne HL.	J Psychol. 1995 Sep;129(5):519-29.	J Psychol. 1995	PubMed	citation	PMID:7473303	pubmed	7473303	create date:1995/09/01 | first author:Murray PD
The measurement of social support in the 'European Research on Incapacitating Diseases and Social Support': the development of the Social Support Questionnaire for Transactions (SSQT).	/pubmed/7610428	Suurmeijer TP, Doeglas DM, BrianÌ¤on S, Krijnen WP, Krol B, Sanderman R, Moum T, Bjelle A, Van Den Heuvel WJ.	Soc Sci Med. 1995 May;40(9):1221-9.	Soc Sci Med. 1995	PubMed	citation	PMID:7610428	pubmed	7610428	create date:1995/05/01 | first author:Suurmeijer TP
The impact of postmodernism on research methodology: implications for nursing.	/pubmed/7728591	Parsons C.	Nurs Inq. 1995 Mar;2(1):22-8.	Nurs Inq. 1995	PubMed	citation	PMID:7728591	pubmed	7728591	create date:1995/03/01 | first author:Parsons C
Lactate dehydrogenase-release assay: a reliable, nonradioactive technique for analysis of cytotoxic lymphocyte-mediated lytic activity against blasts from acute myelocytic leukemia.	/pubmed/7718644	Weidmann E, Brieger J, Jahn B, Hoelzer D, Bergmann L, Mitrou PS.	Ann Hematol. 1995 Mar;70(3):153-8.	Ann Hematol. 1995	PubMed	citation	PMID:7718644	pubmed	7718644	create date:1995/03/01 | first author:Weidmann E
Urinary excretion of proteolyzed alpha1-antitrypsin: specificity, quantitation, and relation to therapy response in patients with acute myeloid leukemia.	/pubmed/9815974	Dengler R, Plewan A, MÌ_nstermann U, Busch R, Eger G, Emmerich B.	Clin Cancer Res. 1995 Feb;1(2):199-205.	Clin Cancer Res. 1995	PubMed	citation	PMID:9815974	pubmed	9815974	create date:1995/02/01 | first author:Dengler R
Revictimization by polygraph: the practice of polygraphing survivors of sexual assault.	/pubmed/8524007	Sloan LM.	Med Law. 1995;14(3-4):255-67.	Med Law. 1995	PubMed	citation	PMID:8524007	pubmed	8524007	create date:1995/01/01 | first author:Sloan LM
CD34+/CD33+ blast cells: correlation with FAB subtypes.	/pubmed/7496354	Rigolin GM, Lanza F, Ferrari L, Castoldi G.	Leuk Lymphoma. 1995;18 Suppl 1:43-8.	Leuk Lymphoma. 1995	PubMed	citation	PMID:7496354	pubmed	7496354	create date:1995/01/01 | first author:Rigolin GM
A victimization assessment tool: instrument development and clinical implications.	/pubmed/7822596	Hoff LA, Rosenbaum L.	J Adv Nurs. 1994 Oct;20(4):627-34.	J Adv Nurs. 1994	PubMed	citation	PMID:7822596	pubmed	7822596	create date:1994/10/01 | first author:Hoff LA
Estimating the real number of chronically uninsured.	/pubmed/10136674	McBride TD.	J Am Health Policy. 1994 Jul-Aug;4(4):16-20, 22-3. Review.	J Am Health Policy. 1994	PubMed	citation	PMID:10136674	pubmed	10136674	create date:1994/06/07 | first author:McBride TD
CD34 immunostaining of bone marrow biopsy specimens is a reliable way to classify the phases of chronic myeloid leukemia.	/pubmed/7512785	Orazi A, Neiman RS, Cualing H, Heerema NA, John K.	Am J Clin Pathol. 1994 Apr;101(4):426-8.	Am J Clin Pathol. 1994	PubMed	citation	PMID:7512785	pubmed	7512785	create date:1994/04/01 | first author:Orazi A
A cluster analysis of Basic Personality Inventory (BPI) adolescent profiles.	/pubmed/8014252	Bonynge ER.	J Clin Psychol. 1994 Mar;50(2):265-72.	J Clin Psychol. 1994	PubMed	citation	PMID:8014252	pubmed	8014252	create date:1994/03/01 | first author:Bonynge ER
Evaluation of suicide intervention effectiveness.	/pubmed/10133100	Neimeyer RA, Pfeiffer AM.	Death Stud. 1994 Mar-Apr;18(2):131-66. Review.	Death Stud. 1994	PubMed	citation	PMID:10133100	pubmed	10133100	create date:1994/02/07 | first author:Neimeyer RA
[How reliable are official data on attempted suicides? (based on Vienna 1989 statistics)].	/pubmed/8053206	Etzersdorfer E, Wancata J, Sonneck G.	Wien Klin Wochenschr. 1994;106(3):63-8. German.	Wien Klin Wochenschr. 1994	PubMed	citation	PMID:8053206	pubmed	8053206	create date:1994/01/01 | first author:Etzersdorfer E
Measuring quality of care in psychiatric emergencies: construction and evaluation of a Bayesian index.	/pubmed/8514497	Gustafson DH, Sainfort F, Johnson SW, Sateia M.	Health Serv Res. 1993 Jun;28(2):131-58.	Health Serv Res. 1993	PubMed	citation	PMID:8514497 | PMCID:PMC1069927	pubmed	8514497	create date:1993/06/01 | first author:Gustafson DH
DSM-III and the transformation of American psychiatry: a history.	/pubmed/8434655	Wilson M.	Am J Psychiatry. 1993 Mar;150(3):399-410. Review.	Am J Psychiatry. 1993	PubMed	citation	PMID:8434655	pubmed	8434655	create date:1993/03/01 | first author:Wilson M
Re-analysis of prognosis in refractory anemia alone, with ring sideroblasts, and with excess of blasts.	/pubmed/8477059	Oguma S, Yoshida Y, Uchino H, Okuma M, Maekawa T, Nomura T.	Int J Hematol. 1993 Jan;57(1):15-25.	Int J Hematol. 1993	PubMed	citation	PMID:8477059	pubmed	8477059	create date:1993/01/01 | first author:Oguma S
[Echocardiographic diagnosis of acute rejection of transplanted heart].	/pubmed/7967325	Shumakov VI, Belova AE, Kormer AIa, Gudim TV, Kazakov EN, Chestukhin VV, Mogilevski€_ GG.	Kardiologiia. 1993;33(5):32-4. Russian.	Kardiologiia. 1993	PubMed	citation	PMID:7967325	pubmed	7967325	create date:1993/01/01 | first author:Shumakov VI
Alpha-hydroxybutyrate dehydrogenase and the diagnosis of painful crisis in sickle cell anaemia.	/pubmed/1308075	Akenzua GI, Ihongbe JC, Asemota HN.	Afr J Med Med Sci. 1992 Dec;21(2):13-7.	Afr J Med Med Sci. 1992	PubMed	citation	PMID:1308075	pubmed	1308075	create date:1992/12/01 | first author:Akenzua GI
Determination of thiazole-4-carboxamide adenine dinucleotide (TAD) levels in mononuclear cells of leukemic patients treated with tiazofurin.	/pubmed/1989637	Zhen W, Jayaram HN, Weber G.	Biochem Pharmacol. 1991 Jan 15;41(2):281-6.	Biochem Pharmacol. 1991	PubMed	citation	PMID:1989637	pubmed	1989637	create date:1991/01/15 | first author:Zhen W
An intercultural assessment of the type, intensity and number of crisis precipitating factors in three cultures: United States, Brazil and Taiwan.	/pubmed/1938179	Coler MS, Hafner LP.	Int J Nurs Stud. 1991;28(3):223-35.	Int J Nurs Stud. 1991	PubMed	citation	PMID:1938179	pubmed	1938179	create date:1991/01/01 | first author:Coler MS
[Relationship between muscular palpation and three dimensional incisal path at border movement of mandible].	/pubmed/2626161	Udagawa G.	Nichidai Koko Kagaku. 1989 Jun;15(2):111-20. Japanese.	Nichidai Koko Kagaku. 1989	PubMed	citation	PMID:2626161	pubmed	2626161	create date:1989/06/01 | first author:Udagawa G
Human T lymphocytes possess a limited in vitro life span.	/pubmed/2786475	Perillo NL, Walford RL, Newman MA, Effros RB.	Exp Gerontol. 1989;24(3):177-87.	Exp Gerontol. 1989	PubMed	citation	PMID:2786475	pubmed	2786475	create date:1989/01/01 | first author:Perillo NL
Neonatal T cells as a model system to study the possible in vitro senescence of lymphocytes.	/pubmed/3501379	Effros RB, Walford RL.	Exp Gerontol. 1987;22(5):307-16.	Exp Gerontol. 1987	PubMed	citation	PMID:3501379	pubmed	3501379	create date:1987/01/01 | first author:Effros RB
[Diagnostic value of determining urinary fibrin split products in glomerulonephritis, pyelonephritis and graft rejection].	/pubmed/366978	Schmitt E, Seyfarth M, Templin R, Schneider P, Klinkmann H.	Z Urol Nephrol. 1978 Nov;71(11):787-97. German.	Z Urol Nephrol. 1978	PubMed	citation	PMID:366978	pubmed	366978	create date:1978/11/01 | first author:Schmitt E

## Sheet: 3) Cell line authentication
"Cell line authentication"		17th November 2017
Title	URL	Description	Details	ShortDetails	Resource	Type	Identifiers	Db	EntrezUID	Properties
The Imperative Authentication of Cell Lines.	/pubmed/29066454	Rojas A.	Antimicrob Agents Chemother. 2017 Oct 24;61(11). pii: e01823-17. doi: 10.1128/AAC.01823-17. Print 2017 Nov. No abstract available.	Antimicrob Agents Chemother. 2017	PubMed	citation	PMID:29066454 | PMCID:PMC5655083	pubmed	29066454	create date:2017/10/27 | first author:Rojas A
The 22Rv1 prostate cancer cell line carries mixed genetic ancestry: Implications for prostate cancer health disparities research using pre-clinical models.	/pubmed/29030865	Woods-Burnham L, Basu A, Cajigas-Du Ross CK, Love A, Yates C, De Leon M, Roy S, Casiano CA.	Prostate. 2017 Dec;77(16):1601-1608. doi: 10.1002/pros.23437. Epub 2017 Oct 14.	Prostate. 2017	PubMed	citation	PMID:29030865	pubmed	29030865	create date:2017/10/17 | first author:Woods-Burnham L
Authentication of M14 melanoma cell line proves misidentification of MDA-MB-435 breast cancer cell line.	/pubmed/28940260	Korch C, Hall EM, Dirks WG, Ewing M, Faries M, Varella-Garcia M, Robinson S, Storts D, Turner JA, Wang Y, Burnett EC, Healy L, Kniss D, Neve RM, Nims RW, Reid YA, Robinson WA, Capes-Davis A.	Int J Cancer. 2017 Sep 22. doi: 10.1002/ijc.31067. [Epub ahead of print]	Int J Cancer. 2017	PubMed	citation	PMID:28940260	pubmed	28940260	create date:2017/09/25 | first author:Korch C
Investigation of cross-contamination among human cell lines used in China.	/pubmed/28795393	Wang M, Yang M, Liu Y, Huang Y, Ye F, Zheng C, Shen C.	Int J Cancer. 2017 Aug 10. doi: 10.1002/ijc.30923. [Epub ahead of print]	Int J Cancer. 2017	PubMed	citation	PMID:28795393	pubmed	28795393	create date:2017/08/11 | first author:Wang M
Targeted Genome Sequencing Reveals Varicella-Zoster Virus Open Reading Frame 12 Deletion.	/pubmed/28747504	Cohrs RJ, Lee KS, Beach A, Sanford B, Baird NL, Como C, Graybill C, Jones D, Tekeste E, Ballard M, Chen X, Yalacki D, Frietze S, Jones K, Lenac Rovis T, JonjiÄ‡ S, Haas J, Gilden D.	J Virol. 2017 Sep 27;91(20). pii: e01141-17. doi: 10.1128/JVI.01141-17. Print 2017 Oct 15.	J Virol. 2017	PubMed	citation	PMID:28747504 | PMCID:PMC5625521	pubmed	28747504	create date:2017/07/28 | first author:Cohrs RJ
Widespread Use of Misidentified Cell Line KB (HeLa): Incorrect Attribution and Its Impact Revealed through Mining the Scientific Literature.	/pubmed/28455420	Vaughan L, GlÃ¤nzel W, Korch C, Capes-Davis A.	Cancer Res. 2017 Jun 1;77(11):2784-2788. doi: 10.1158/0008-5472.CAN-16-2258. Epub 2017 Apr 28.	Cancer Res. 2017	PubMed	citation	PMID:28455420	pubmed	28455420	create date:2017/04/30 | first author:Vaughan L
The need for a worldwide consensus for cell line authentication: Experience implementing a mandatory requirement at the International Journal of Cancer.	/pubmed/28414712	Fusenig NE, Capes-Davis A, Bianchini F, Sundell S, Lichter P.	PLoS Biol. 2017 Apr 17;15(4):e2001438. doi: 10.1371/journal.pbio.2001438. eCollection 2017 Apr.	PLoS Biol. 2017	PubMed	citation	PMID:28414712 | PMCID:PMC5393552	pubmed	28414712	create date:2017/04/18 | first author:Fusenig NE
STR Profiling of HTLV-1-Infected Cell Lines.	/pubmed/28357668	Raimondi V, Minuzzo S, Ciminale V, D'Agostino DM.	Methods Mol Biol. 2017;1582:143-154. doi: 10.1007/978-1-4939-6872-5_11.	Methods Mol Biol. 2017	PubMed	citation	PMID:28357668	pubmed	28357668	create date:2017/03/31 | first author:Raimondi V
Establishing a reference dataset for the authentication of spinal muscular atrophy cell lines using STR profiling and digital PCR.	/pubmed/28284873	Stabley DL, Holbrook J, Harris AW, Swoboda KJ, Crawford TO, Sol-Church K, Butchbach MER.	Neuromuscul Disord. 2017 May;27(5):439-446. doi: 10.1016/j.nmd.2017.02.002. Epub 2017 Feb 6.	Neuromuscul Disord. 2017	PubMed	citation	PMID:28284873 | PMCID:PMC5403612	pubmed	28284873	create date:2017/03/13 | first author:Stabley DL
Cell lines authentication and mycoplasma detection as minimun quality control of cell lines in biobanking.	/pubmed/28255773	Corral-VÃ¡zquez C, Aguilar-Quesada R, Catalina P, Lucena-Aguilar G, Ligero G, Miranda B, Carrillo-Ãvila JA.	Cell Tissue Bank. 2017 Jun;18(2):271-280. doi: 10.1007/s10561-017-9617-6. Epub 2017 Mar 2.	Cell Tissue Bank. 2017	PubMed	citation	PMID:28255773 | PMCID:PMC5429902	pubmed	28255773	create date:2017/03/04 | first author:Corral-VÃ¡zquez C
A novel RNA sequencing data analysis method for cell line authentication.	/pubmed/28192450	Fasterius E, Raso C, Kennedy S, Rauch N, Lundin P, Kolch W, UhlÃ©n M, Al-Khalili Szigyarto C.	PLoS One. 2017 Feb 13;12(2):e0171435. doi: 10.1371/journal.pone.0171435. eCollection 2017.	PLoS One. 2017	PubMed	citation	PMID:28192450 | PMCID:PMC5305277	pubmed	28192450	create date:2017/02/14 | first author:Fasterius E
Are your results valid? Cellular authentication a need from the past, an emergency on the present.	/pubmed/28127703	Cosme B, Falagan-Lotsch P, Ribeiro M, NapoleÃ£o K, Granjeiro JM, Moura-Neto R.	In Vitro Cell Dev Biol Anim. 2017 May;53(5):430-434. doi: 10.1007/s11626-016-0124-z. Epub 2017 Jan 27.	In Vitro Cell Dev Biol Anim. 2017	PubMed	citation	PMID:28127703	pubmed	28127703	create date:2017/01/28 | first author:Cosme B
Identification of newly established Spodoptera littoralis cell lines by two DNA barcoding markers.	/pubmed/28127700	Ahmed I, Huebner H, Mamoori YI, Buchholz R.	In Vitro Cell Dev Biol Anim. 2017 Apr;53(4):288-292. doi: 10.1007/s11626-016-0118-x. Epub 2017 Jan 26.	In Vitro Cell Dev Biol Anim. 2017	PubMed	citation	PMID:28127700	pubmed	28127700	create date:2017/01/28 | first author:Ahmed I
Structure elucidation, DNA binding specificity and antiproliferative proficiency of isolated compounds from Garcinia nervosa.	/pubmed/28082231	Parveen M, Azaz S, Zafar A, Ahmad F, Silva MR, Silva PS.	J Photochem Photobiol B. 2017 Feb;167:176-188. doi: 10.1016/j.jphotobiol.2016.12.035. Epub 2016 Dec 30.	J Photochem Photobiol B. 2017	PubMed	citation	PMID:28082231	pubmed	28082231	create date:2017/01/14 | first author:Parveen M
Authentication and characterisation of a new oesophageal adenocarcinoma cell line: MFD-1.	/pubmed/27600491	Garcia E, Hayden A, Birts C, Britton E, Cowie A, Pickard K, Mellone M, Choh C, Derouet M, Duriez P, Noble F, White MJ, Primrose JN, Strefford JC, Rose-Zerilli M, Thomas GJ, Ang Y, Sharrocks AD, Fitzgerald RC, Underwood TJ; OCCAMS consortium..	Sci Rep. 2016 Sep 7;6:32417. doi: 10.1038/srep32417.	Sci Rep. 2016	PubMed	citation	PMID:27600491 | PMCID:PMC5013399	pubmed	27600491	create date:2016/09/08 | first author:Garcia E
Functional Authentication of a Novel Gastropod Gonadotropin-Releasing Hormone Receptor Reveals Unusual Features and Evolutionary Insight.	/pubmed/27467252	Kavanaugh SI, Tsai PS.	PLoS One. 2016 Jul 28;11(7):e0160292. doi: 10.1371/journal.pone.0160292. eCollection 2016.	PLoS One. 2016	PubMed	citation	PMID:27467252 | PMCID:PMC4964986	pubmed	27467252	create date:2016/07/29 | first author:Kavanaugh SI
Genetic variability in a frozen batch of MCF-7 cells invisible in routine authentication affecting cell function.	/pubmed/27456714	Kleensang A, Vantangoli MM, Odwin-DaCosta S, Andersen ME, Boekelheide K, Bouhifd M, Fornace AJ Jr, Li HH, Livi CB, Madnick S, Maertens A, Rosenberg M, Yager JD, Zhaog L, Hartung T.	Sci Rep. 2016 Jul 26;6:28994. doi: 10.1038/srep28994.	Sci Rep. 2016	PubMed	citation	PMID:27456714 | PMCID:PMC4960662	pubmed	27456714	create date:2016/07/28 | first author:Kleensang A
Authentication: A Standard Problem or a Problem of Standards?	/pubmed/27300550	Capes-Davis A, Neve RM.	PLoS Biol. 2016 Jun 14;14(6):e1002477. doi: 10.1371/journal.pbio.1002477. eCollection 2016 Jun.	PLoS Biol. 2016	PubMed	citation	PMID:27300550 | PMCID:PMC4907433	pubmed	27300550	create date:2016/06/15 | first author:Capes-Davis A
Standards for Cell Line Authentication and Beyond.	/pubmed/27300367	Almeida JL, Cole KD, Plant AL.	PLoS Biol. 2016 Jun 14;14(6):e1002476. doi: 10.1371/journal.pbio.1002476. eCollection 2016 Jun.	PLoS Biol. 2016	PubMed	citation	PMID:27300367 | PMCID:PMC4907466	pubmed	27300367	create date:2016/06/15 | first author:Almeida JL
Characterization of fibroblast-free CWR-R1ca castration-recurrent prostate cancer cell line.	/pubmed/27271795	Shourideh M, DePriest A, Mohler JL, Wilson EM, Koochekpour S.	Prostate. 2016 Sep;76(12):1067-77. doi: 10.1002/pros.23190. Epub 2016 Jun 8.	Prostate. 2016	PubMed	citation	PMID:27271795	pubmed	27271795	create date:2016/06/09 | first author:Shourideh M
Changes of heterogeneous cell populations in the Ishikawa cell line during long-term culture: Proposal for an in vitro clonal evolution model of tumor cells.	/pubmed/27107655	Kasai F, Hirayama N, Ozawa M, Iemura M, Kohara A.	Genomics. 2016 Jun;107(6):259-66. doi: 10.1016/j.ygeno.2016.04.003. Epub 2016 Apr 20.	Genomics. 2016	PubMed	citation	PMID:27107655	pubmed	27107655	create date:2016/04/25 | first author:Kasai F
Quality Assurance in the Polio Laboratory. Cell Sensitivity and Cell Authentication Assays.	/pubmed/26983732	Dunn G.	Methods Mol Biol. 2016;1387:109-27. doi: 10.1007/978-1-4939-3292-4_6.	Methods Mol Biol. 2016	PubMed	citation	PMID:26983732	pubmed	26983732	create date:2016/03/18 | first author:Dunn G
The human ovarian cancer cell line CABAÂ I: A peculiar genetic evolution.	/pubmed/26934856	Giusti I, Cervelli C, D'Ascenzo S, Di Francesco M, Ligas C, D'Alessandro E, Papola F, Dolo V.	Int J Mol Med. 2016 Apr;37(4):879-88. doi: 10.3892/ijmm.2016.2501. Epub 2016 Feb 25.	Int J Mol Med. 2016	PubMed	citation	PMID:26934856 | PMCID:PMC4790663	pubmed	26934856	create date:2016/03/05 | first author:Giusti I
Raising the standards of stem cell line quality.	/pubmed/26911906	Yaffe MP, Noggle SA, Solomon SL.	Nat Cell Biol. 2016 Mar;18(3):236-7. doi: 10.1038/ncb3313. Review.	Nat Cell Biol. 2016	PubMed	citation	PMID:26911906	pubmed	26911906	create date:2016/02/26 | first author:Yaffe MP
Alteration of STR profiles in ovarian carcinoma cells during primary culture.	/pubmed/26825732	Huang X, Weimer J, von Wurmb-Schwark N, Fredrik R, Arnold N, Schem C.	Arch Gynecol Obstet. 2016 Aug;294(2):369-76. doi: 10.1007/s00404-016-4018-9. Epub 2016 Jan 29.	Arch Gynecol Obstet. 2016	PubMed	citation	PMID:26825732	pubmed	26825732	create date:2016/01/31 | first author:Huang X
Multivariate Calibration Approach for Quantitative Determination of Cell-Line Cross Contamination by Intact Cell Mass Spectrometry and Artificial Neural Networks.	/pubmed/26821236	Valletta E, KuÄera L, ProkeÅ¡ L, Amato F, Pivetta T, Hampl A, Havel J, VaÅˆhara P.	PLoS One. 2016 Jan 28;11(1):e0147414. doi: 10.1371/journal.pone.0147414. eCollection 2016.	PLoS One. 2016	PubMed	citation	PMID:26821236 | PMCID:PMC4731057	pubmed	26821236	create date:2016/01/29 | first author:Valletta E
The culture of cell culture practices and authentication--Results from a 2015 Survey.	/pubmed/26458546	Freedman LP, Gibson MC, Wisman R, Ethier SP, Soule HR, Reid YA, Neve RM.	Biotechniques. 2015 Oct 1;59(4):189-90, 192. doi: 10.2144/000114344. eCollection 2015 Oct. No abstract available.	Biotechniques. 2015	PubMed	citation	PMID:26458546	pubmed	26458546	create date:2015/10/16 | first author:Freedman LP
Authentication of newly established human esophageal squamous cell carcinoma cell line (YM-1) using short tandem repeat (STR) profiling method.	/pubmed/26432330	Ayyoob K, Masoud K, Vahideh K, Jahanbakhsh A.	Tumour Biol. 2016 Mar;37(3):3197-204. doi: 10.1007/s13277-015-4133-4. Epub 2015 Oct 2.	Tumour Biol. 2016	PubMed	citation	PMID:26432330	pubmed	26432330	create date:2015/10/04 | first author:Ayyoob K
Genetic profiling reveals an alarming rate of cross-contamination among human cell lines used in China.	/pubmed/26116706	Ye F, Chen C, Qin J, Liu J, Zheng C.	FASEB J. 2015 Oct;29(10):4268-72. doi: 10.1096/fj.14-266718. Epub 2015 Jun 26.	FASEB J. 2015	PubMed	citation	PMID:26116706	pubmed	26116706	create date:2015/06/28 | first author:Ye F
Rapid phenotypic fingerprinting of cell products by robust measurement of ubiquitous surface markers.	/pubmed/26072709	Baradez MO, Lekishvili T, Marshall D.	Cytometry A. 2015 Jul;87(7):624-35. doi: 10.1002/cyto.a.22637. Epub 2015 Jun 12.	Cytometry A. 2015	PubMed	citation	PMID:26072709	pubmed	26072709	create date:2015/06/16 | first author:Baradez MO
Reproducibility: changing the policies and culture of cell line authentication.	/pubmed/26020501	Freedman LP, Gibson MC, Ethier SP, Soule HR, Neve RM, Reid YA.	Nat Methods. 2015 Jun;12(6):493-7. doi: 10.1038/nmeth.3403. No abstract available.	Nat Methods. 2015	PubMed	citation	PMID:26020501	pubmed	26020501	create date:2015/05/29 | first author:Freedman LP
A resource for cell line authentication, annotation and quality control.	/pubmed/25877200	Yu M, Selvaraj SK, Liang-Chu MM, Aghajani S, Busse M, Yuan J, Lee G, Peale F, Klijn C, Bourgon R, Kaminker JS, Neve RM.	Nature. 2015 Apr 16;520(7547):307-11. doi: 10.1038/nature14397.	Nature. 2015	PubMed	citation	PMID:25877200	pubmed	25877200	create date:2015/04/17 | first author:Yu M
Human biosample authentication using the high-throughput, cost-effective SNPtrace(TM) system.	/pubmed/25714623	Liang-Chu MM, Yu M, Haverty PM, Koeman J, Ziegle J, Lee M, Bourgon R, Neve RM.	PLoS One. 2015 Feb 25;10(2):e0116218. doi: 10.1371/journal.pone.0116218. eCollection 2015.	PLoS One. 2015	PubMed	citation	PMID:25714623 | PMCID:PMC4340925	pubmed	25714623	create date:2015/02/26 | first author:Liang-Chu MM
A simple flow cytometry-based barcode for routine authentication of multiple myeloma and mantle cell lymphoma cell lines.	/pubmed/25688540	MaÃ¯ga S, Brosseau C, Descamps G, Dousset C, Gomez-Bougie P, Chiron D, MÃ©noret E, Kervoelen C, ViÃ© H, Cesbron A, Moreau-Aubry A, Amiot M, Pellat-Deceunynck C.	Cytometry A. 2015 Apr;87(4):285-8. doi: 10.1002/cyto.a.22643. Epub 2015 Feb 16. No abstract available.	Cytometry A. 2015	PubMed	citation	PMID:25688540	pubmed	25688540	create date:2015/02/18 | first author:MaÃ¯ga S
PF2405, standardized fraction of Scutellaria baicalensis, ameliorates colitis in vitro and in vivo.	/pubmed/25577335	Jiang WY, Seo GS, Kim YC, Sohn DH, Lee SH.	Arch Pharm Res. 2015 Jun;38(6):1127-37. doi: 10.1007/s12272-015-0553-3. Epub 2015 Jan 11.	Arch Pharm Res. 2015	PubMed	citation	PMID:25577335	pubmed	25577335	create date:2015/01/13 | first author:Jiang WY
SNP array profiling of mouse cell lines identifies their strains of origin and reveals cross-contamination and widespread aneuploidy.	/pubmed/25277546	Didion JP, Buus RJ, Naghashfar Z, Threadgill DW, Morse HC 3rd, de Villena FP.	BMC Genomics. 2014 Oct 3;15:847. doi: 10.1186/1471-2164-15-847.	BMC Genomics. 2014	PubMed	citation	PMID:25277546 | PMCID:PMC4198738	pubmed	25277546	create date:2014/10/04 | first author:Didion JP
Characterization of ductal carcinoma in situ cell lines established from breast tumor of a Singapore Chinese patient.	/pubmed/25264427	Yong JW, Choong ML, Wang S, Wang Y, Lim SQ, Lee MA.	Cancer Cell Int. 2014 Sep 20;14(1):94. doi: 10.1186/s12935-014-0094-8. eCollection 2014.	Cancer Cell Int. 2014	PubMed	citation	PMID:25264427 | PMCID:PMC4177074	pubmed	25264427	create date:2014/09/30 | first author:Yong JW
Guidelines for the use of cell lines in biomedical research.	/pubmed/25117809	Geraghty RJ, Capes-Davis A, Davis JM, Downward J, Freshney RI, Knezevic I, Lovell-Badge R, Masters JR, Meredith J, Stacey GN, Thraves P, Vias M; Cancer Research UK..	Br J Cancer. 2014 Sep 9;111(6):1021-46. doi: 10.1038/bjc.2014.166. Epub 2014 Aug 12.	Br J Cancer. 2014	PubMed	citation	PMID:25117809 | PMCID:PMC4453835	pubmed	25117809	create date:2014/08/15 | first author:Geraghty RJ
Establishment and characterization of a highly tumorigenic African American prostate cancer cell line, E006AA-hT.	/pubmed/25076860	Koochekpour S, Willard SS, Shourideh M, Ali S, Liu C, Azabdaftari G, Saleem M, Attwood K.	Int J Biol Sci. 2014 Jul 26;10(8):834-45. doi: 10.7150/ijbs.9406. eCollection 2014.	Int J Biol Sci. 2014	PubMed	citation	PMID:25076860 | PMCID:PMC4115195	pubmed	25076860	create date:2014/08/01 | first author:Koochekpour S
Comprehensive high-throughput RNA sequencing analysis reveals contamination of multiple nasopharyngeal carcinoma cell lines with HeLa cell genomes.	/pubmed/24991015	Strong MJ, Baddoo M, Nanbo A, Xu M, Puetter A, Lin Z.	J Virol. 2014 Sep;88(18):10696-704. doi: 10.1128/JVI.01457-14. Epub 2014 Jul 2.	J Virol. 2014	PubMed	citation	PMID:24991015 | PMCID:PMC4178894	pubmed	24991015	create date:2014/07/06 | first author:Strong MJ
Epidermal growth factor-like domain-containing protein 7 (EGFL7) enhances EGF receptor-AKT signaling, epithelial-mesenchymal transition, and metastasis of gastric cancer cells.	/pubmed/24945379	Luo BH, Xiong F, Wang JP, Li JH, Zhong M, Liu QL, Luo GQ, Yang XJ, Xiao N, Xie B, Xiao H, Liu RJ, Dong CS, Wang KS, Wen JF.	PLoS One. 2014 Jun 19;9(6):e99922. doi: 10.1371/journal.pone.0099922. eCollection 2014.	PLoS One. 2014	PubMed	citation	PMID:24945379 | PMCID:PMC4063792	pubmed	24945379	create date:2014/06/20 | first author:Luo BH
Cell line cross-contamination: WSU-CLL is a known derivative of REH and is unsuitable as a model for chronic lymphocytic leukaemia.	/pubmed/24923861	International Cell Line Authentication Committee (ICLAC)..	Leuk Res. 2014 Aug;38(8):999-1001. doi: 10.1016/j.leukres.2014.05.003. Epub 2014 May 23. No abstract available.	Leuk Res. 2014	PubMed	citation	PMID:24923861	pubmed	24923861	create date:2014/06/14 | first author:International Cell Line Authentication Committee (ICLAC).
Cell banking for pharmaceutical research.	/pubmed/24858015	Wrigley JD, McCall EJ, Bannaghan CL, Liggins L, Kendrick C, Griffen A, Hicks R, FrÃ¶derberg-Roth L.	Drug Discov Today. 2014 Oct;19(10):1518-29. doi: 10.1016/j.drudis.2014.05.006. Epub 2014 May 22. Review.	Drug Discov Today. 2014	PubMed	citation	PMID:24858015	pubmed	24858015	create date:2014/05/27 | first author:Wrigley JD
Establishment and characterization of a piscean PCF cell line for toxicity and gene expression studies as in vitro model.	/pubmed/24852132	Goswami M, Sharma BS, Yadav K, Bahuguna SN, Lakra WS.	Tissue Cell. 2014 Jun;46(3):206-12. doi: 10.1016/j.tice.2014.04.004. Epub 2014 Apr 26.	Tissue Cell. 2014	PubMed	citation	PMID:24852132	pubmed	24852132	create date:2014/05/24 | first author:Goswami M
Cell-line authentication demystified.	/pubmed/24781320	Marx V.	Nat Methods. 2014 Apr 29;11(5):483-8. doi: 10.1038/nmeth.2932. No abstract available.	Nat Methods. 2014	PubMed	citation	PMID:24781320	pubmed	24781320	create date:2014/05/02 | first author:Marx V
Establishment and characterization of an embryonic cell line from Sarconesiopsis magellanica.	/pubmed/24766352	Cruz M, Bello FJ.	J Insect Sci. 2013;13:130. doi: 10.1673/031.013.13001.	J Insect Sci. 2013	PubMed	citation	PMID:24766352 | PMCID:PMC4014039	pubmed	24766352	create date:2014/04/29 | first author:Cruz M
Two new phenolic compounds from Ficus rumphii and their antiproliferative activity.	/pubmed/24666236	Parveen M, Malla AM, Alam M, Ahmad F, Silva PS, Silva MR.	Nat Prod Res. 2014;28(9):646-52. doi: 10.1080/14786419.2014.891201. Epub 2014 Mar 25.	Nat Prod Res. 2014	PubMed	citation	PMID:24666236	pubmed	24666236	create date:2014/03/29 | first author:Parveen M
Use of Sequenom sample ID PlusÂ® SNP genotyping in identification of FFPE tumor samples.	/pubmed/24551080	Miller JK, Buchner N, Timms L, Tam S, Luo X, Brown AM, Pasternack D, Bristow RG, Fraser M, Boutros PC, McPherson JD.	PLoS One. 2014 Feb 13;9(2):e88163. doi: 10.1371/journal.pone.0088163. eCollection 2014.	PLoS One. 2014	PubMed	citation	PMID:24551080 | PMCID:PMC3923782	pubmed	24551080	create date:2014/02/20 | first author:Miller JK
Discovery of HeLa Cell Contamination in HES Cells: Call for Cell Line Authentication in Reproductive Biology Research.	/pubmed/24520087	Kniss DA, Summerfield TL.	Reprod Sci. 2014 Aug;21(8):1015-1019. Epub 2014 Feb 11.	Reprod Sci. 2014	PubMed	citation	PMID:24520087 | PMCID:PMC4126216	pubmed	24520087	create date:2014/02/13 | first author:Kniss DA
Brain tumor cell line authentication, an efficient alternative to capillary electrophoresis by using a microfluidics-based system.	/pubmed/24335698	An Q, Fillmore HL, Vouri M, Pilkington GJ.	Neuro Oncol. 2014 Jan;16(2):265-73. doi: 10.1093/neuonc/not202. Epub 2013 Dec 12.	Neuro Oncol. 2014	PubMed	citation	PMID:24335698 | PMCID:PMC3895385	pubmed	24335698	create date:2013/12/18 | first author:An Q
DNA profiling and characterization of animal cell lines.	/pubmed/24297409	Stacey GN, Byrne E, Hawkins JR.	Methods Mol Biol. 2014;1104:57-73. doi: 10.1007/978-1-62703-733-4_5. Review.	Methods Mol Biol. 2014	PubMed	citation	PMID:24297409	pubmed	24297409	create date:2013/12/04 | first author:Stacey GN
Genetic characteristics of the human hepatic stellate cell line LX-2.	/pubmed/24116068	Weiskirchen R, Weimer J, Meurer SK, Kron A, Seipel B, Vater I, Arnold N, Siebert R, Xu L, Friedman SL, Bergmann C.	PLoS One. 2013 Oct 8;8(10):e75692. doi: 10.1371/journal.pone.0075692. eCollection 2013.	PLoS One. 2013	PubMed	citation	PMID:24116068 | PMCID:PMC3792989	pubmed	24116068	create date:2013/10/12 | first author:Weiskirchen R
Epigenetic and genetic features of 24 colon cancer cell lines.	/pubmed/24042735	Ahmed D, Eide PW, Eilertsen IA, Danielsen SA, EknÃ¦s M, Hektoen M, Lind GE, Lothe RA.	Oncogenesis. 2013 Sep 16;2:e71. doi: 10.1038/oncsis.2013.35.	Oncogenesis. 2013	PubMed	citation	PMID:24042735 | PMCID:PMC3816225	pubmed	24042735	create date:2013/09/18 | first author:Ahmed D
On authentication of cell lines.	/pubmed/24019740	[No authors listed]	Mol Vis. 2013 Aug 27;19:1848-51. eCollection 2013. No abstract available.	Mol Vis. 2013	PubMed	citation	PMID:24019740 | PMCID:PMC3762563	pubmed	24019740	create date:2013/09/11
Establishment and characterization of a novel HPV-negative laryngeal squamous cell carcinoma cell line, FD-LSC-1, with missense and nonsense mutations of TP53 in the DNA-binding domain.	/pubmed/24001612	Wu CP, Zhou L, Gong HL, Du HD, Tian J, Sun S, Li JY.	Cancer Lett. 2014 Jan 1;342(1):92-103. doi: 10.1016/j.canlet.2013.08.041. Epub 2013 Aug 31.	Cancer Lett. 2014	PubMed	citation	PMID:24001612	pubmed	24001612	create date:2013/09/05 | first author:Wu CP
A 2-yr service report of cell line authentication.	/pubmed/23943492	Wu ML, Liao LC, Chen CY, Lee SY, Yuan GF, Hwang SM.	In Vitro Cell Dev Biol Anim. 2013 Dec;49(10):743-5. doi: 10.1007/s11626-013-9669-2. Epub 2013 Aug 14. No abstract available.	In Vitro Cell Dev Biol Anim. 2013	PubMed	citation	PMID:23943492	pubmed	23943492	create date:2013/08/15 | first author:Wu ML
Raman microspectroscopic discrimination of TCam-2 cultures reveals the presence of two sub-populations of cells.	/pubmed/23873629	Eppelmann U, Gottardo F, Wistuba J, Ehmcke J, Kossack N, Westernstroeer B, Redmann K, Wuebbeling F, Burger M, Tuettelmann F, Kliesch S, Mallidis C.	Cell Tissue Res. 2013 Nov;354(2):623-32. doi: 10.1007/s00441-013-1684-9. Epub 2013 Jul 20.	Cell Tissue Res. 2013	PubMed	citation	PMID:23873629	pubmed	23873629	create date:2013/07/23 | first author:Eppelmann U
Emergence of whole-cell MALDI-MS biotyping for high-throughput bioanalysis of mammalian cells?	/pubmed/23590472	Munteanu B, Hopf C.	Bioanalysis. 2013 Apr;5(8):885-93. doi: 10.4155/bio.13.47.	Bioanalysis. 2013	PubMed	citation	PMID:23590472	pubmed	23590472	create date:2013/04/18 | first author:Munteanu B
PF2401-SF, standardized fraction of Salvia miltiorrhiza shows anti-inflammatory activity in macrophages and acute arthritis in vivo.	/pubmed/23583334	Jiang WY, Jeon BH, Kim YC, Lee SH, Sohn DH, Seo GS.	Int Immunopharmacol. 2013 Jun;16(2):160-4. doi: 10.1016/j.intimp.2013.03.028. Epub 2013 Apr 10.	Int Immunopharmacol. 2013	PubMed	citation	PMID:23583334	pubmed	23583334	create date:2013/04/16 | first author:Jiang WY
Phenotypes and karyotypes of human malignant mesothelioma cell lines.	/pubmed/23516439	Relan V, Morrison L, Parsonson K, Clarke BE, Duhig EE, Windsor MN, Matar KS, Naidoo R, Passmore L, McCaul E, Courtney D, Yang IA, Fong KM, Bowman RV.	PLoS One. 2013;8(3):e58132. doi: 10.1371/journal.pone.0058132. Epub 2013 Mar 14.	PLoS One. 2013	PubMed	citation	PMID:23516439 | PMCID:PMC3597627	pubmed	23516439	create date:2013/03/22 | first author:Relan V
Hiding in plain view: genetic profiling reveals decades old cross contamination of bladder cancer cell line KU7 with HeLa.	/pubmed/23500642	JÃ¤ger W, Horiguchi Y, Shah J, Hayashi T, Awrey S, Gust KM, Hadaschik BA, Matsui Y, Anderson S, Bell RH, Ettinger S, So AI, Gleave ME, Lee IL, Dinney CP, Tachibana M, McConkey DJ, Black PC.	J Urol. 2013 Oct;190(4):1404-9. doi: 10.1016/j.juro.2013.03.009. Epub 2013 Mar 7.	J Urol. 2013	PubMed	citation	PMID:23500642 | PMCID:PMC3805942	pubmed	23500642	create date:2013/03/19 | first author:JÃ¤ger W
Morus alba and active compound oxyresveratrol exert anti-inflammatory activity via inhibition of leukocyte migration involving MEK/ERK signaling.	/pubmed/23433072	Chen YC, Tien YJ, Chen CH, Beltran FN, Amor EC, Wang RJ, Wu DJ, Mettling C, Lin YL, Yang WC.	BMC Complement Altern Med. 2013 Feb 23;13:45. doi: 10.1186/1472-6882-13-45.	BMC Complement Altern Med. 2013	PubMed	citation	PMID:23433072 | PMCID:PMC3639811	pubmed	23433072	create date:2013/02/26 | first author:Chen YC
Mouse cell line authentication.	/pubmed/23430347	Almeida JL, Hill CR, Cole KD.	Cytotechnology. 2014 Jan;66(1):133-47. doi: 10.1007/s10616-013-9545-7. Epub 2013 Feb 22.	Cytotechnology. 2014	PubMed	citation	PMID:23430347 | PMCID:PMC3886540	pubmed	23430347	create date:2013/02/23 | first author:Almeida JL
Cell line identity finding by fingerprinting, an optimized resource for short tandem repeat profile authentication.	/pubmed/23356232	Somaschini A, Amboldi N, Nuzzo A, Scacheri E, Ukmar G, Ballinari D, Malyszko J, Raddrizzani L, Landonio A, Gasparri F, Galvani A, Isacchi A, Bosotti R.	Genet Test Mol Biomarkers. 2013 Mar;17(3):254-9. doi: 10.1089/gtmb.2012.0359. Epub 2013 Jan 28.	Genet Test Mol Biomarkers. 2013	PubMed	citation	PMID:23356232	pubmed	23356232	create date:2013/01/30 | first author:Somaschini A
Human cell line authentication: the critical first step in any project using human cell lines.	/pubmed/23296621	McLaren RS, Reid Y, Storts DR.	Methods Mol Biol. 2013;963:341-53. doi: 10.1007/978-1-62703-230-8_21.	Methods Mol Biol. 2013	PubMed	citation	PMID:23296621	pubmed	23296621	create date:2013/01/09 | first author:McLaren RS
Cell-line authentication: End the scandal of false cell lines.	/pubmed/23235867	Masters JR.	Nature. 2012 Dec 13;492(7428):186. doi: 10.1038/492186a. No abstract available.	Nature. 2012	PubMed	citation	PMID:23235867	pubmed	23235867	create date:2012/12/14 | first author:Masters JR
STR DNA typing of human cell lines: detection of intra- and interspecies cross-contamination.	/pubmed/23179824	Dirks WG, Drexler HG.	Methods Mol Biol. 2013;946:27-38. doi: 10.1007/978-1-62703-128-8_3.	Methods Mol Biol. 2013	PubMed	citation	PMID:23179824	pubmed	23179824	create date:2012/11/28 | first author:Dirks WG
Match criteria for human cell line authentication: where do we draw the line?	/pubmed/23136038	Capes-Davis A, Reid YA, Kline MC, Storts DR, Strauss E, Dirks WG, Drexler HG, MacLeod RA, Sykes G, Kohara A, Nakamura Y, Elmore E, Nims RW, Alston-Roberts C, Barallon R, Los GV, Nardone RM, Price PJ, Steuer A, Thomson J, Masters JR, Kerrigan L.	Int J Cancer. 2013 Jun 1;132(11):2510-9. doi: 10.1002/ijc.27931. Epub 2012 Nov 28.	Int J Cancer. 2013	PubMed	citation	PMID:23136038	pubmed	23136038	create date:2012/11/09 | first author:Capes-Davis A
The importance of molecular cytogenetic analysis prior to using cell lines in research: The case of the KG-1a leukemia cell line.	/pubmed/22844360	Pelliccia F, Ubertini V, Bosco N.	Oncol Lett. 2012 Aug;4(2):237-240. Epub 2012 May 9.	Oncol Lett. 2012	PubMed	citation	PMID:22844360 | PMCID:PMC3402744	pubmed	22844360	create date:2012/07/31 | first author:Pelliccia F
Expression of p24 gag protein of bovine leukemia virus in insect cells and its use in immunodetection of the disease.	/pubmed/22829115	Larsen A, Gonzalez ET, Serena MS, EcheverrÃ­a MG, Mortola E.	Mol Biotechnol. 2013 Jun;54(2):475-83. doi: 10.1007/s12033-012-9587-7.	Mol Biotechnol. 2013	PubMed	citation	PMID:22829115	pubmed	22829115	create date:2012/07/26 | first author:Larsen A
Sourcing and using stem cell lines for radiation research: Potential, challenges and good stem cell culture practice.	/pubmed/22823510	Stacey G.	Int J Radiat Biol. 2012 Oct;88(10):703-8.	Int J Radiat Biol. 2012	PubMed	citation	PMID:22823510	pubmed	22823510	create date:2012/07/25 | first author:Stacey G
[Cellulose acetate membrane electrophoresis CAE and Raman spectroscopy as a method identification of beta-glucans, used as biologically and therapeutically active biomaterials].	/pubmed/22783735	Pielesz A, BiniaÅ› W, Paluch J.	Polim Med. 2012;42(1):69-77. Polish.	Polim Med. 2012	PubMed	citation	PMID:22783735	pubmed	22783735	create date:2012/07/13 | first author:Pielesz A
Authentication of primordial characteristics of the CLBL-1 cell line prove the integrity of a canine B-cell lymphoma in a murine in vivo model.	/pubmed/22761949	RÃ¼tgen BC, Willenbrock S, Reimann-Berg N, Walter I, Fuchs-Baumgartinger A, Wagner S, Kovacic B, Essler SE, Schwendenwein I, Nolte I, SaalmÃ¼ller A, Murua Escobar H.	PLoS One. 2012;7(6):e40078. doi: 10.1371/journal.pone.0040078. Epub 2012 Jun 28.	PLoS One. 2012	PubMed	citation	PMID:22761949 | PMCID:PMC3386195	pubmed	22761949	create date:2012/07/05 | first author:RÃ¼tgen BC
Authentication of the R06E fruit bat cell line.	/pubmed/22754654	Jordan I, Munster VJ, Sandig V.	Viruses. 2012 May;4(5):889-900. doi: 10.3390/v4050889. Epub 2012 May 23.	Viruses. 2012	PubMed	citation	PMID:22754654 | PMCID:PMC3386627	pubmed	22754654	create date:2012/07/04 | first author:Jordan I
DNA profiling analysis of endometrial and ovarian cell lines reveals misidentification, redundancy and contamination.	/pubmed/22710073	Korch C, Spillman MA, Jackson TA, Jacobsen BM, Murphy SK, Lessey BA, Jordan VC, Bradford AP.	Gynecol Oncol. 2012 Oct;127(1):241-8. doi: 10.1016/j.ygyno.2012.06.017. Epub 2012 Jun 16.	Gynecol Oncol. 2012	PubMed	citation	PMID:22710073 | PMCID:PMC3432677	pubmed	22710073	create date:2012/06/20 | first author:Korch C
High-throughput SNP-based authentication of human cell lines.	/pubmed/22700458	Castro F, Dirks WG, FÃ¤hnrich S, Hotz-Wagenblatt A, Pawlita M, Schmitt M.	Int J Cancer. 2013 Jan 15;132(2):308-14. doi: 10.1002/ijc.27675. Epub 2012 Jun 28.	Int J Cancer. 2013	PubMed	citation	PMID:22700458 | PMCID:PMC3492511	pubmed	22700458	create date:2012/06/16 | first author:Castro F
The current state of cell contamination and authentication-and what it means for biobanks.	/pubmed/24835061	Reid Y, Mintzer J.	Biopreserv Biobank. 2012 Jun;10(3):236-8. doi: 10.1089/bio.2012.1039. No abstract available.	Biopreserv Biobank. 2012	PubMed	citation	PMID:24835061	pubmed	24835061	create date:2012/06/01 | first author:Reid Y
Authentication of African green monkey cell lines using human short tandem repeat markers.	/pubmed/22059503	Almeida JL, Hill CR, Cole KD.	BMC Biotechnol. 2011 Nov 7;11:102. doi: 10.1186/1472-6750-11-102.	BMC Biotechnol. 2011	PubMed	citation	PMID:22059503 | PMCID:PMC3221628	pubmed	22059503	create date:2011/11/09 | first author:Almeida JL
Kinetic cellular phenotypic profiling: prediction, identification, and analysis of bioactive natural products.	/pubmed/21793491	Fu H, Fu W, Sun M, Shou Q, Zhai Y, Cheng H, Teng L, Mou X, Li Y, Wan S, Zhang S, Xu Q, Zhang X, Wang J, Zhu J, Wang X, Xu X, Lv G, Jin L, Guo W, Ke Y.	Anal Chem. 2011 Sep 1;83(17):6518-26. doi: 10.1021/ac201670e. Epub 2011 Aug 12.	Anal Chem. 2011	PubMed	citation	PMID:21793491	pubmed	21793491	create date:2011/07/29 | first author:Fu H
Characterization and authentication of cancer cell lines: an overview.	/pubmed/21516396	Reid YA.	Methods Mol Biol. 2011;731:35-43. doi: 10.1007/978-1-61779-080-5_4. Review.	Methods Mol Biol. 2011	PubMed	citation	PMID:21516396	pubmed	21516396	create date:2011/04/26 | first author:Reid YA
The ethanol extract of Scutellaria baicalensis and the active compounds induce cell cycle arrest and apoptosis including upregulation of p53 and Bax in human lung cancer cells.	/pubmed/21457722	Gao J, Morgan WA, Sanchez-Medina A, Corcoran O.	Toxicol Appl Pharmacol. 2011 Aug 1;254(3):221-8. doi: 10.1016/j.taap.2011.03.016. Epub 2011 Mar 30.	Toxicol Appl Pharmacol. 2011	PubMed	citation	PMID:21457722	pubmed	21457722	create date:2011/04/05 | first author:Gao J
History of leukemia-lymphoma cell lines.	/pubmed/20973832	Drexler HG, Macleod RA.	Hum Cell. 2010 Aug;23(3):75-82. doi: 10.1111/j.1749-0774.2010.00087.x. Epub 2010 Oct 4. Review.	Hum Cell. 2010	PubMed	citation	PMID:20973832	pubmed	20973832	create date:2010/10/27 | first author:Drexler HG
Human, mouse or rat? Species authentication of glioma-derived cell cultures.	/pubmed/20951163	Higgins SC, Steingrimsdottir H, Pilkington GJ.	J Neurosci Methods. 2010 Dec 15;194(1):139-43. doi: 10.1016/j.jneumeth.2010.10.002. Epub 2010 Oct 14.	J Neurosci Methods. 2010	PubMed	citation	PMID:20951163	pubmed	20951163	create date:2010/10/19 | first author:Higgins SC
Short tandem repeat profiling: part of an overall strategy for reducing the frequency of cell misidentification.	/pubmed/20927602	Nims RW, Sykes G, Cottrill K, Ikonomi P, Elmore E.	In Vitro Cell Dev Biol Anim. 2010 Dec;46(10):811-9. doi: 10.1007/s11626-010-9352-9. Epub 2010 Oct 7. Review.	In Vitro Cell Dev Biol Anim. 2010	PubMed	citation	PMID:20927602 | PMCID:PMC2995877	pubmed	20927602	create date:2010/10/12 | first author:Nims RW
Characterization and functional expression of the natriuretic peptide system in human lens epithelial cells.	/pubmed/20700369	Cammarata PR, Braun B, Dimitrijevich SD, Pack J.	Mol Vis. 2010 Apr 9;16:630-8.	Mol Vis. 2010	PubMed	citation	PMID:20700369 | PMCID:PMC2852620	pubmed	20700369	create date:2010/08/12 | first author:Cammarata PR
Recommendation of short tandem repeat profiling for authenticating human cell lines, stem cells, and tissues.	/pubmed/20614197	Barallon R, Bauer SR, Butler J, Capes-Davis A, Dirks WG, Elmore E, Furtado M, Kline MC, Kohara A, Los GV, MacLeod RA, Masters JR, Nardone M, Nardone RM, Nims RW, Price PJ, Reid YA, Shewale J, Sykes G, Steuer AF, Storts DR, Thomson J, et al.	In Vitro Cell Dev Biol Anim. 2010 Oct;46(9):727-32. doi: 10.1007/s11626-010-9333-z. Epub 2010 Jul 8.	In Vitro Cell Dev Biol Anim. 2010	PubMed	citation	PMID:20614197 | PMCID:PMC2965362	pubmed	20614197	create date:2010/07/09 | first author:Barallon R
Development, characterization, conservation and storage of fish cell lines: a review.	/pubmed/20607393	Lakra WS, Swaminathan TR, Joy KP.	Fish Physiol Biochem. 2011 Mar;37(1):1-20. doi: 10.1007/s10695-010-9411-x. Epub 2010 Jul 6. Review.	Fish Physiol Biochem. 2011	PubMed	citation	PMID:20607393	pubmed	20607393	create date:2010/07/08 | first author:Lakra WS
Cell line misidentification: the beginning of the end.	/pubmed/20448633	American Type Culture Collection Standards Development Organization Workgroup ASN-0002..	Nat Rev Cancer. 2010 Jun;10(6):441-8. doi: 10.1038/nrc2852. Epub 2010 May 7. Review.	Nat Rev Cancer. 2010	PubMed	citation	PMID:20448633	pubmed	20448633	create date:2010/05/08 | first author:American Type Culture Collection Standards Development Organization Workgroup ASN-0002.
Phenotype and genotype of pancreatic cancer cell lines.	/pubmed/20418756	Deer EL, GonzÃ¡lez-HernÃ¡ndez J, Coursen JD, Shea JE, Ngatia J, Scaife CL, Firpo MA, Mulvihill SJ.	Pancreas. 2010 May;39(4):425-35. doi: 10.1097/MPA.0b013e3181c15963. Review.	Pancreas. 2010	PubMed	citation	PMID:20418756 | PMCID:PMC2860631	pubmed	20418756	create date:2010/04/27 | first author:Deer EL
Molecular authentication and characterization of the antiherpetic activity of the cyanobacterium Arthrospira fusiformis.	/pubmed/20225659	Sharaf M, Amara A, Aboul-Enein A, Helmi S, Ballot A, Astani A, Schnitzler P.	Pharmazie. 2010 Feb;65(2):132-6.	Pharmazie. 2010	PubMed	citation	PMID:20225659	pubmed	20225659	create date:2010/03/17 | first author:Sharaf M
Check your cultures! A list of cross-contaminated or misidentified cell lines.	/pubmed/20143388	Capes-Davis A, Theodosopoulos G, Atkin I, Drexler HG, Kohara A, MacLeod RA, Masters JR, Nakamura Y, Reid YA, Reddel RR, Freshney RI.	Int J Cancer. 2010 Jul 1;127(1):1-8. doi: 10.1002/ijc.25242. Review.	Int J Cancer. 2010	PubMed	citation	PMID:20143388	pubmed	20143388	create date:2010/02/10 | first author:Capes-Davis A
Identification of cross-contaminated animal cells by PCR and isoenzyme analysis.	/pubmed/20130989	Ramya R, Nagarajan T, Sivakumar V, Senthilkumar RL, Bala Obulapathi B, Thiagarajan D, Srinivasan VA.	Cytotechnology. 2009 Dec;61(3):81-92. doi: 10.1007/s10616-009-9245-5. Epub 2010 Feb 4.	Cytotechnology. 2009	PubMed	citation	PMID:20130989 | PMCID:PMC2825302	pubmed	20130989	create date:2010/02/05 | first author:Ramya R
Authentication and banking of human pluripotent stem cells.	/pubmed/19960451	Josephson R, Auerbach J.	Curr Protoc Stem Cell Biol. 2009 Dec;Chapter 1:Unit 1C.9. doi: 10.1002/9780470151808.sc01c09s11.	Curr Protoc Stem Cell Biol. 2009	PubMed	citation	PMID:19960451	pubmed	19960451	create date:2009/12/05 | first author:Josephson R
Obligation for cell line authentication: appeal for concerted action.	/pubmed/19882693	Lichter P, Allgayer H, Bartsch H, Fusenig N, Hemminki K, von Knebel Doeberitz M, Kyewski B, Miller AB, zur Hausen H.	Int J Cancer. 2010 Jan 1;126(1):1. doi: 10.1002/ijc.24985. No abstract available.	Int J Cancer. 2010	PubMed	citation	PMID:19882693	pubmed	19882693	create date:2009/11/03 | first author:Lichter P
Atypical caseinolytic protease homolog from Plasmodium falciparum possesses unusual substrate preference and a functional nuclear localization signal.	/pubmed/19789896	Lin W, Chan M, Sim TS.	Parasitol Res. 2009 Nov;105(6):1715-22. doi: 10.1007/s00436-009-1612-9. Epub 2009 Sep 30.	Parasitol Res. 2009	PubMed	citation	PMID:19789896	pubmed	19789896	create date:2009/10/01 | first author:Lin W
Is parainfluenza virus a threatening virus for human cancer cell lines?	/pubmed/19624309	Danjoh I, Sone H, Noda N, Iimura E, Nagayoshi M, Saijo K, Hiroyama T, Nakamura Y.	Hum Cell. 2009 Aug;22(3):81-4. doi: 10.1111/j.1749-0774.2009.00071.x. Epub 2009 Jun 23.	Hum Cell. 2009	PubMed	citation	PMID:19624309	pubmed	19624309	create date:2009/07/25 | first author:Danjoh I
Genetic profiling reveals cross-contamination and misidentification of 6 adenoid cystic carcinoma cell lines: ACC2, ACC3, ACCM, ACCNS, ACCS and CAC2.	/pubmed/19557180	Phuchareon J, Ohta Y, Woo JM, Eisele DW, Tetsu O.	PLoS One. 2009 Jun 25;4(6):e6040. doi: 10.1371/journal.pone.0006040.	PLoS One. 2009	PubMed	citation	PMID:19557180 | PMCID:PMC2698276	pubmed	19557180	create date:2009/06/27 | first author:Phuchareon J
The use of short tandem repeat profiling to characterize human bladder cancer cell lines.	/pubmed/19375735	Chiong E, Dadbin A, Harris LD, Sabichi AL, Grossman HB.	J Urol. 2009 Jun;181(6):2737-48. doi: 10.1016/j.juro.2009.01.108. Epub 2009 Apr 17.	J Urol. 2009	PubMed	citation	PMID:19375735 | PMCID:PMC2680455	pubmed	19375735	create date:2009/04/21 | first author:Chiong E
Validation of oligonucleotide-mediated gene editing.	/pubmed/19340016	Disterer P, Simons JP, Owen JS.	Gene Ther. 2009 Jun;16(6):824-6. doi: 10.1038/gt.2009.32. Epub 2009 Apr 2.	Gene Ther. 2009	PubMed	citation	PMID:19340016	pubmed	19340016	create date:2009/04/03 | first author:Disterer P
Vernonia amygdalina: anticancer activity, authentication, and adulteration detection.	/pubmed/19151428	Gresham LJ, Ross J, Izevbigie EB.	Int J Environ Res Public Health. 2008 Dec;5(5):342-8.	Int J Environ Res Public Health. 2008	PubMed	citation	PMID:19151428 | PMCID:PMC3699993	pubmed	19151428	create date:2009/01/20 | first author:Gresham LJ
Cell line provenance.	/pubmed/19003293	Freshney RI.	Cytotechnology. 2002 Jul;39(2):55-67. doi: 10.1023/A:1022949730029.	Cytotechnology. 2002	PubMed	citation	PMID:19003293 | PMCID:PMC3463983	pubmed	19003293	create date:2008/11/13 | first author:Freshney RI
Cell Line Data Base: structure and recent improvements towards molecular authentication of human cell lines.	/pubmed/18927105	Romano P, Manniello A, Aresu O, Armento M, Cesaro M, Parodi B.	Nucleic Acids Res. 2009 Jan;37(Database issue):D925-32. doi: 10.1093/nar/gkn730. Epub 2008 Oct 15.	Nucleic Acids Res. 2009	PubMed	citation	PMID:18927105 | PMCID:PMC2686526	pubmed	18927105	create date:2008/10/18 | first author:Romano P
Rapid identification and authentication of closely related animal cell culture by polymerase chain reaction.	/pubmed/18553210	Liu M, Liu H, Tang X, Vafai A.	In Vitro Cell Dev Biol Anim. 2008 Jul-Aug;44(7):224-7. doi: 10.1007/s11626-008-9121-1. Epub 2008 Jun 14.	In Vitro Cell Dev Biol Anim. 2008	PubMed	citation	PMID:18553210	pubmed	18553210	create date:2008/06/17 | first author:Liu M
Authentication of cell lines: ignore at your peril!	/pubmed/18366279	Freshney RI.	Expert Rev Anticancer Ther. 2008 Mar;8(3):311-4. doi: 10.1586/14737140.8.3.311. No abstract available.	Expert Rev Anticancer Ther. 2008	PubMed	citation	PMID:18366279	pubmed	18366279	create date:2008/03/28 | first author:Freshney RI
Antibody variable-region sequencing as a method for hybridoma cell-line authentication.	/pubmed/18320189	Koren S, Kosmac M, Colja Venturini A, Montanic S, Curin Serbec V.	Appl Microbiol Biotechnol. 2008 Apr;78(6):1071-8. doi: 10.1007/s00253-008-1386-5. Epub 2008 Mar 5.	Appl Microbiol Biotechnol. 2008	PubMed	citation	PMID:18320189	pubmed	18320189	create date:2008/03/06 | first author:Koren S
Human leukemia and lymphoma cell lines as models and resources.	/pubmed/18288989	MacLeod RA, Nagel S, Scherr M, Schneider B, Dirks WG, Uphoff CC, Quentmeier H, Drexler HG.	Curr Med Chem. 2008;15(4):339-59. Review.	Curr Med Chem. 2008	PubMed	citation	PMID:18288989	pubmed	18288989	create date:2008/02/22 | first author:MacLeod RA
Authentication of nasopharyngeal carcinoma tumor lines.	/pubmed/18196576	Chan SY, Choy KW, Tsao SW, Tao Q, Tang T, Chung GT, Lo KW.	Int J Cancer. 2008 May 1;122(9):2169-71. doi: 10.1002/ijc.23374. No abstract available.	Int J Cancer. 2008	PubMed	citation	PMID:18196576	pubmed	18196576	create date:2008/01/16 | first author:Chan SY
Persistent use of "false" cell lines.	/pubmed/17960586	Lacroix M.	Int J Cancer. 2008 Jan 1;122(1):1-4. Review.	Int J Cancer. 2008	PubMed	citation	PMID:17960586	pubmed	17960586	create date:2007/10/26 | first author:Lacroix M
Eradication of cross-contaminated cell lines: a call for action.	/pubmed/17522957	Nardone RM.	Cell Biol Toxicol. 2007 Nov;23(6):367-72. Epub 2007 May 24.	Cell Biol Toxicol. 2007	PubMed	citation	PMID:17522957	pubmed	17522957	create date:2007/05/25 | first author:Nardone RM
Species identification of animal cells by nested PCR targeted to mitochondrial DNA.	/pubmed/17516125	Ono K, Satoh M, Yoshida T, Ozawa Y, Kohara A, Takeuchi M, Mizusawa H, Sawada H.	In Vitro Cell Dev Biol Anim. 2007 May-Jun;43(5-6):168-75. Epub 2007 May 22.	In Vitro Cell Dev Biol Anim. 2007	PubMed	citation	PMID:17516125	pubmed	17516125	create date:2007/05/23 | first author:Ono K
Profiling and authentication of human cell lines using short tandem repeat (STR) loci: Report from the National Cell Bank of Iran.	/pubmed/17254797	Azari S, Ahmadi N, Tehrani MJ, Shokri F.	Biologicals. 2007 Jun;35(3):195-202. Epub 2007 Jan 24.	Biologicals. 2007	PubMed	citation	PMID:17254797	pubmed	17254797	create date:2007/01/27 | first author:Azari S
A relevant in vitro eukaryotic live-cell system for the evaluation of plasmodial protein localization.	/pubmed/16839657	Chan M, Tan DS, Wong SH, Sim TS.	Biochimie. 2006 Oct;88(10):1367-75. Epub 2006 Jun 22.	Biochimie. 2006	PubMed	citation	PMID:16839657	pubmed	16839657	create date:2006/07/15 | first author:Chan M
Essential role for gene profiling analysis in the authentication of human cell lines.	/pubmed/16643607	Yoshino K, Iimura E, Saijo K, Iwase S, Fukami K, Ohno T, Obata Y, Nakamura Y.	Hum Cell. 2006 Feb;19(1):43-8.	Hum Cell. 2006	PubMed	citation	PMID:16643607	pubmed	16643607	create date:2006/04/29 | first author:Yoshino K
Identification and differentiation of Panax species using ELISA, RAPD and eastern blotting.	/pubmed/16454476	Tanaka H, Fukuda N, Shoyama Y.	Phytochem Anal. 2006 Jan-Feb;17(1):46-55.	Phytochem Anal. 2006	PubMed	citation	PMID:16454476	pubmed	16454476	create date:2006/02/04 | first author:Tanaka H
Metabolic profiling and phylogenetic analysis of medicinal Zingiber species: Tools for authentication of ginger (Zingiber officinale Rosc).	/pubmed/16169024	Jiang H, Xie Z, Koo HJ, McLaughlin SP, Timmermann BN, Gang DR.	Phytochemistry. 2006 Aug;67(15):1673-85. Epub 2005 Oct 5.	Phytochemistry. 2006	PubMed	citation	PMID:16169024	pubmed	16169024	create date:2005/09/20 | first author:Jiang H
The piscine SAF-1 cell line: genetic stability and labeling.	/pubmed/15976938	BÃ©jar J, Porta J, Borrego JJ, Alvarez MC.	Mar Biotechnol (NY). 2005 Jul-Aug;7(4):389-95. Epub 2005 Jun 4.	Mar Biotechnol (NY). 2005	PubMed	citation	PMID:15976938	pubmed	15976938	create date:2005/06/25 | first author:BÃ©jar J
Short tandem repeat DNA typing provides an international reference standard for authentication of human cell lines.	/pubmed/15953965	Dirks WG, Faehnrich S, Estella IA, Drexler HG.	ALTEX. 2005;22(2):103-9.	ALTEX. 2005	PubMed	citation	PMID:15953965	pubmed	15953965	create date:2005/06/15 | first author:Dirks WG
[Establishment and characterization of a human acute monocytic leukemic cell line, SHI-1, carrying t(6;11)(q27;23) and p53 gene alteration].	/pubmed/15921626	Chen SN, Xue YQ, Zhang XG, Wu YF, Pan JL, Wang Y, Cen JN.	Zhonghua Xue Ye Xue Za Zhi. 2005 Feb;26(2):94-9. Chinese.	Zhonghua Xue Ye Xue Za Zhi. 2005	PubMed	citation	PMID:15921626	pubmed	15921626	create date:2005/06/01 | first author:Chen SN
Authentication of scientific human cell lines: easy-to-use DNA fingerprinting.	/pubmed/15361654	Dirks WG, Drexler HG.	Methods Mol Biol. 2005;290:35-50.	Methods Mol Biol. 2005	PubMed	citation	PMID:15361654	pubmed	15361654	create date:2004/09/14 | first author:Dirks WG
Identification and authentication of animal cell culture by polymerase chain reaction amplification and DNA sequencing.	/pubmed/14753847	Liu MY, Lin SC, Liu H, Candal F, Vafai A.	In Vitro Cell Dev Biol Anim. 2003 Nov-Dec;39(10):424-7.	In Vitro Cell Dev Biol Anim. 2003	PubMed	citation	PMID:14753847	pubmed	14753847	create date:2004/02/03 | first author:Liu MY
Use of polymorphisms in the noncoding region of the human mitochondrial genome to identify potential contamination of human leukemia-lymphoma cell lines.	/pubmed/14745432	Hutter G, Nickenig C, Garritsen H, Hellenkamp F, Hoerning A, Hiddemann W, Dreyling M.	Hematol J. 2004;5(1):61-8.	Hematol J. 2004	PubMed	citation	PMID:14745432	pubmed	14745432	create date:2004/01/28 | first author:Hutter G
Authentication of cancer cell lines by DNA fingerprinting.	/pubmed/14634217	Dirks WG, Drexler HG.	Methods Mol Med. 2004;88:43-55. No abstract available.	Methods Mol Med. 2004	PubMed	citation	PMID:14634217	pubmed	14634217	create date:2003/11/25 | first author:Dirks WG
Characterization and authentication of cancer cell lines: an overview.	/pubmed/14634216	Langdon SP.	Methods Mol Med. 2004;88:33-42. Review. No abstract available.	Methods Mol Med. 2004	PubMed	citation	PMID:14634216	pubmed	14634216	create date:2003/11/25 | first author:Langdon SP
Molecular cytogenetic characterization of the KG-1 and KG-1a acute myeloid leukemia cell lines by use of spectral karyotyping and fluorescence in situ hybridization.	/pubmed/14506699	MrÃ³zek K, Tanner SM, Heinonen K, Bloomfield CD.	Genes Chromosomes Cancer. 2003 Nov;38(3):249-52.	Genes Chromosomes Cancer. 2003	PubMed	citation	PMID:14506699	pubmed	14506699	create date:2003/09/25 | first author:MrÃ³zek K
Characterization and authentication of insect cell lines using RAPD markers.	/pubmed/14505697	LÃ©ry X, LaRue B, Cossette J, Charpentier G.	Insect Biochem Mol Biol. 2003 Oct;33(10):1035-41.	Insect Biochem Mol Biol. 2003	PubMed	citation	PMID:14505697	pubmed	14505697	create date:2003/09/25 | first author:LÃ©ry X
False leukemia-lymphoma cell lines: an update on over 500 cell lines.	/pubmed/12592342	Drexler HG, Dirks WG, Matsuo Y, MacLeod RA.	Leukemia. 2003 Feb;17(2):416-26.	Leukemia. 2003	PubMed	citation	PMID:12592342	pubmed	12592342	create date:2003/02/20 | first author:Drexler HG
Short tandem repeat profiling provides an international reference standard for human cell lines.	/pubmed/11416159	Masters JR, Thomson JA, Daly-Burns B, Reid YA, Dirks WG, Packer P, Toji LH, Ohno T, Tanabe H, Arlett CF, Kelland LR, Harrison M, Virmani A, Ward TH, Ayres KL, Debenham PG.	Proc Natl Acad Sci U S A. 2001 Jul 3;98(14):8012-7. Epub 2001 Jun 19.	Proc Natl Acad Sci U S A. 2001	PubMed	citation	PMID:11416159 | PMCID:PMC35459	pubmed	11416159	create date:2001/06/21 | first author:Masters JR
Continuous hematopoietic cell lines as model systems for leukemia-lymphoma research.	/pubmed/11086173	Drexler HG, Matsuo AY, MacLeod RA.	Leuk Res. 2000 Nov;24(11):881-911. Review.	Leuk Res. 2000	PubMed	citation	PMID:11086173	pubmed	11086173	create date:2000/11/22 | first author:Drexler HG
Efficient DNA fingerprinting method for the identification of cross-culture contamination of cell lines.	/pubmed/10695022	Matsuo Y, Nishizaki C, Drexler HG.	Hum Cell. 1999 Sep;12(3):149-54.	Hum Cell. 1999	PubMed	citation	PMID:10695022	pubmed	10695022	create date:2000/03/01 | first author:Matsuo Y
Malignant hematopoietic cell lines: in vitro models for the study of myelodysplastic syndromes.	/pubmed/10654445	Drexler HG.	Leuk Res. 2000 Feb;24(2):109-15.	Leuk Res. 2000	PubMed	citation	PMID:10654445	pubmed	10654445	create date:2000/02/02 | first author:Drexler HG
First searchable database for DNA profiles of human cell lines: sequential use of fingerprint techniques for authentication.	/pubmed/10541480	Dirks W, MacLeod RA, JÃ¤ger K, Milch H, Drexler HG.	Cell Mol Biol (Noisy-le-grand). 1999 Sep;45(6):841-53.	Cell Mol Biol (Noisy-le-grand). 1999	PubMed	citation	PMID:10541480	pubmed	10541480	create date:1999/12/14 | first author:Dirks W
Widespread intraspecies cross-contamination of human tumor cell lines arising at source.	/pubmed/10508494	MacLeod RA, Dirks WG, Matsuo Y, Kaufmann M, Milch H, Drexler HG.	Int J Cancer. 1999 Nov 12;83(4):555-63.	Int J Cancer. 1999	PubMed	citation	PMID:10508494	pubmed	10508494	create date:1999/10/03 | first author:MacLeod RA
Authentication of two cell lines developed from the larval and pupal ovaries of Spodoptera litura by rRNA based methods.	/pubmed/10475268	Shouche YS, Patole MS, Pant U, Paranjape S, Banerjee K.	In Vitro Cell Dev Biol Anim. 1999 May;35(5):244-5. No abstract available.	In Vitro Cell Dev Biol Anim. 1999	PubMed	citation	PMID:10475268	pubmed	10475268	create date:1999/09/04 | first author:Shouche YS
Guidelines for the characterization and publication of human malignant hematopoietic cell lines.	/pubmed/10360369	Drexler HG, Matsuo Y.	Leukemia. 1999 Jun;13(6):835-42.	Leukemia. 1999	PubMed	citation	PMID:10360369	pubmed	10360369	create date:1999/06/09 | first author:Drexler HG
Insect cell line authentication by denaturing gradient gel electrophoresis.	/pubmed/9794214	Kshirsagar SG, Patole MS, Shouche YS.	In Vitro Cell Dev Biol Anim. 1998 Oct;34(9):665-7. No abstract available.	In Vitro Cell Dev Biol Anim. 1998	PubMed	citation	PMID:9794214	pubmed	9794214	create date:1998/10/30 | first author:Kshirsagar SG
Cell line banking and authentication.	/pubmed/9737372	Hay RJ.	Dev Biol Stand. 1998;93:15-9. Review. No abstract available.	Dev Biol Stand. 1998	PubMed	citation	PMID:9737372	pubmed	9737372	create date:1998/09/16 | first author:Hay RJ
Proposals for the characterization and description of new human leukemia-lymphoma cell lines.	/pubmed/9710721	Drexler HG, Matsuo Y, Minowada J.	Hum Cell. 1998 Mar;11(1):51-60.	Hum Cell. 1998	PubMed	citation	PMID:9710721	pubmed	9710721	create date:1998/08/26 | first author:Drexler HG
Cell line characterization and authentication.	/pubmed/9648106	Kaplan J, Hukku B.	Methods Cell Biol. 1998;57:203-16. Review.	Methods Cell Biol. 1998	PubMed	citation	PMID:9648106	pubmed	9648106	create date:1998/07/02 | first author:Kaplan J
Human cells and cell cultures: availability, authentication and future prospects.	/pubmed/9183642	Hay RJ.	Hum Cell. 1996 Sep;9(3):143-52. Review.	Hum Cell. 1996	PubMed	citation	PMID:9183642	pubmed	9183642	create date:1996/09/01 | first author:Hay RJ
Rapid authentication of animal cell lines using pyrolysis mass spectrometry and auto-associative artificial neural networks.	/pubmed/22358755	Goodacre R, Rischert DJ, Evans PM, Kell DB.	Cytotechnology. 1996 Jan;21(3):231-41. doi: 10.1007/BF00365346.	Cytotechnology. 1996	PubMed	citation	PMID:22358755	pubmed	22358755	create date:1996/01/01 | first author:Goodacre R
DNA fingerprinting transforms the art of cell authentication.	/pubmed/1589025	Stacey GN, Bolton BJ, Doyle A.	Nature. 1992 May 21;357(6375):261-2.	Nature. 1992	PubMed	citation	PMID:1589025	pubmed	1589025	create date:1992/05/21 | first author:Stacey GN
Methods for authenticating cell lines.	/pubmed/1478343	Hay RJ.	Dev Biol Stand. 1992;76:25-37.	Dev Biol Stand. 1992	PubMed	citation	PMID:1478343	pubmed	1478343	create date:1992/01/01 | first author:Hay RJ
Multilocus DNA fingerprint analysis of cell banks: stability studies and culture identification in human B-lymphoblastoid and mammalian cell lines.	/pubmed/1369387	Stacey GN, Bolton BJ, Morgan D, Clark SA, Doyle A.	Cytotechnology. 1992;8(1):13-20.	Cytotechnology. 1992	PubMed	citation	PMID:1369387	pubmed	1369387	create date:1992/01/01 | first author:Stacey GN
DNA fingerprinting--a valuable new technique for the characterisation of cell lines.	/pubmed/1369174	Stacey G, Bolton B, Doyle A, Griffiths B.	Cytotechnology. 1992;9(1-3):211-6.	Cytotechnology. 1992	PubMed	citation	PMID:1369174	pubmed	1369174	create date:1992/01/01 | first author:Stacey G
The quality control of cell banks using DNA fingerprinting.	/pubmed/1831163	Stacey GN, Bolton BJ, Doyle A.	EXS. 1991;58:361-70. Review.	EXS. 1991	PubMed	citation	PMID:1831163	pubmed	1831163	create date:1991/01/01 | first author:Stacey GN
Authentication of a human lymphoblastoid cell line producing a retrovirus and the infectivity of human T-cell and B-cell lines with the virus.	/pubmed/3266096	Oda T, Watanabe S, Maki Y, Ikeda S, Seki S, Murakami M, Endo S, Asonuma H, Matsubara T.	Cell Mol Biol. 1988;34(5):529-37. No abstract available.	Cell Mol Biol. 1988	PubMed	citation	PMID:3266096	pubmed	3266096	create date:1988/01/01 | first author:Oda T
Sequential immunofluorescence and infectivity studies on the replication of Herpesvirus saimiri in owl monkey kidney cells.	/pubmed/188981	Morgan DG, Epstein MA.	J Gen Virol. 1977 Jan;34(1):61-72.	J Gen Virol. 1977	PubMed	citation	PMID:188981	pubmed	188981	create date:1977/01/01 | first author:Morgan DG

## Sheet: 4) Additional articles
Additional articles
Title	URL	Description	Details	ShortDetails	Resource	Type	Identifiers	Db	EntrezUID	Properties
Opinion: Is science really facing a reproducibility crisis, and do we need it to?	/pubmed/29531051	Fanelli D.	Proc Natl Acad Sci U S A. 2018 Mar 13;115(11):2628-2631. doi: 10.1073/pnas.1708272114.	Proc Natl Acad Sci U S A. 2018	PubMed	citation	PMID:29531051	pubmed	29531051	create date:2018/03/14 | first author:Fanelli D
Reproducible preclinical research-Is embracing variability the answer?	/pubmed/29505576	Karp NA.	PLoS Biol. 2018 Mar 5;16(3):e2005413. doi: 10.1371/journal.pbio.2005413. eCollection 2018 Mar.	PLoS Biol. 2018	PubMed	citation	PMID:29505576 | PMCID:PMC5837077	pubmed	29505576	create date:2018/03/06 | first author:Karp NA
Reproducibility and replicability in zebrafish behavioral neuroscience research.	/pubmed/29481830	Gerlai R.	Pharmacol Biochem Behav. 2018 Feb 23. pii: S0091-3057(17)30608-1. doi: 10.1016/j.pbb.2018.02.005. [Epub ahead of print] Review.	Pharmacol Biochem Behav. 2018	PubMed	citation	PMID:29481830	pubmed	29481830	create date:2018/02/27 | first author:Gerlai R
Reproducibility of preclinical animal research improves with heterogeneity of study samples.	/pubmed/29470495	Voelkl B, Vogt L, Sena ES, W√ºrbel H.	PLoS Biol. 2018 Feb 22;16(2):e2003693. doi: 10.1371/journal.pbio.2003693. eCollection 2018 Feb.	PLoS Biol. 2018	PubMed	citation	PMID:29470495 | PMCID:PMC5823461	pubmed	29470495	create date:2018/02/23 | first author:Voelkl B
Artificial intelligence faces reproducibility crisis.	/pubmed/29449469	Hutson M.	Science. 2018 Feb 16;359(6377):725-726. doi: 10.1126/science.359.6377.725. No abstract available.	Science. 2018	PubMed	citation	PMID:29449469	pubmed	29449469	create date:2018/02/17 | first author:Hutson M
Modelling science trustworthiness under publish or perish pressure.	/pubmed/29410855	Grimes DR, Bauch CT, Ioannidis JPA.	R Soc Open Sci. 2018 Jan 10;5(1):171511. doi: 10.1098/rsos.171511. eCollection 2018 Jan.	R Soc Open Sci. 2018	PubMed	citation	PMID:29410855 | PMCID:PMC5792932	pubmed	29410855	create date:2018/02/08 | first author:Grimes DR
Building capacity to encourage research reproducibility and #MakeResearchTrue.	/pubmed/29339941	Rethlefsen ML, Lackey MJ, Zhao S.	J Med Libr Assoc. 2018 Jan;106(1):113-119. doi: 10.5195/jmla.2018.273. Epub 2018 Jan 2.	J Med Libr Assoc. 2018	PubMed	citation	PMID:29339941 | PMCID:PMC5764576	pubmed	29339941	create date:2018/01/18 | first author:Rethlefsen ML
Genotypic variability enhances the reproducibility of an ecological study.	/pubmed/29335575	Milcu A, Puga-Freitas R, Ellison AM, Blouin M, Scheu S, Freschet GT, Rose L, Barot S, Cesarz S, Eisenhauer N, Girin T, Assandri D, Bonkowski M, Buchmann N, Butenschoen O, Devidal S, Gleixner G, Gessler A, Gigon A, Greiner A, Grignani C, Hansart A, et al.	Nat Ecol Evol. 2018 Feb;2(2):279-287. doi: 10.1038/s41559-017-0434-x. Epub 2018 Jan 15.	Nat Ecol Evol. 2018	PubMed	citation	PMID:29335575	pubmed	29335575	create date:2018/01/18 | first author:Milcu A
Replication Study: Transcriptional amplification in tumor cells with elevated c-Myc.	/pubmed/29313490	Lewis LM, Edwards MC, Meyers ZR, Talbot CC, Hao H, Blum D; Reproducibility Project: Cancer Biology., Iorns E, Tsui R, Denis A, Perfito N, Errington TM.	Elife. 2018 Jan 9;7. pii: e30274. doi: 10.7554/eLife.30274.	Elife. 2018	PubMed	citation	PMID:29313490 | PMCID:PMC5760205	pubmed	29313490	create date:2018/01/10 | first author:Lewis LM
Replication Study: Systematic identification of genomic markers of drug sensitivity in cancer cells.	/pubmed/29313488	Vanden Heuvel JP, Maddox E, Maalouf SW; Reproducibility Project: Cancer Biology., Iorns E, Tsui R, Denis A, Perfito N, Errington TM.	Elife. 2018 Jan 9;7. pii: e29747. doi: 10.7554/eLife.29747.	Elife. 2018	PubMed	citation	PMID:29313488 | PMCID:PMC5760202	pubmed	29313488	create date:2018/01/10 | first author:Vanden Heuvel JP
Systematic heterogenization for better reproducibility in animal experimentation.	/pubmed/29296016	Richter SH.	Lab Anim (NY). 2017 Aug 31;46(9):343-349. doi: 10.1038/laban.1330.	Lab Anim (NY). 2017	PubMed	citation	PMID:29296016	pubmed	29296016	create date:2018/01/04 | first author:Richter SH
How often should we expect to be wrong? Statistical power, P values, and the expected prevalence of false discoveries.	/pubmed/29248599	Marino MJ.	Biochem Pharmacol. 2017 Dec 14. pii: S0006-2952(17)30723-2. doi: 10.1016/j.bcp.2017.12.011. [Epub ahead of print] Review.	Biochem Pharmacol. 2017	PubMed	citation	PMID:29248599	pubmed	29248599	create date:2017/12/19 | first author:Marino MJ
Five ways to fix statistics.	/pubmed/29189798	Leek J, McShane BB, Gelman A, Colquhoun D, Nuijten MB, Goodman SN.	Nature. 2017 Nov 30;551(7682):557-559. doi: 10.1038/d41586-017-07522-z. No abstract available.	Nature. 2017	PubMed	citation	PMID:29189798	pubmed	29189798	create date:2017/12/01 | first author:Leek J
Lacking quality in research: Is behavioral neuroscience affected more than other areas of biomedical science?	/pubmed/29107620	Bespalov A, Steckler T.	J Neurosci Methods. 2017 Oct 28. pii: S0165-0270(17)30374-6. doi: 10.1016/j.jneumeth.2017.10.018. [Epub ahead of print]	J Neurosci Methods. 2017	PubMed	citation	PMID:29107620	pubmed	29107620	create date:2017/11/07 | first author:Bespalov A
Steps towards transparency in research publishing.	/pubmed/28959991	[No authors listed]	Nature. 2017 Sep 26;549(7673):431. doi: 10.1038/549431a. No abstract available.	Nature. 2017	PubMed	citation	PMID:28959991	pubmed	28959991	create date:2017/09/30
Revisiting inconsistency in large pharmacogenomic studies.	/pubmed/28928933	Safikhani Z, Smirnov P, Freeman M, El-Hachem N, She A, Rene Q, Goldenberg A, Birkbak NJ, Hatzis C, Shi L, Beck AH, Aerts HJWL, Quackenbush J, Haibe-Kains B.	Version 3. F1000Res. 2016 Sep 16 [revised 2017 Jan 1];5:2333. doi: 10.12688/f1000research.9611.3. eCollection 2016.	F1000Res. 2016	PubMed	citation	PMID:28928933 | PMCID:PMC5580432	pubmed	28928933	create date:2017/09/25 | first author:Safikhani Z
A long journey to reproducible results.	/pubmed/28836615	Lithgow GJ, Driscoll M, Phillips P.	Nature. 2017 Aug 22;548(7668):387-388. doi: 10.1038/548387a. No abstract available.	Nature. 2017	PubMed	citation	PMID:28836615	pubmed	28836615	create date:2017/08/25 | first author:Lithgow GJ
Replication Study: The common feature of leukemia-associated IDH1 and IDH2 mutations is a neomorphic enzyme activity converting alpha-ketoglutarate to 2-hydroxyglutarate.	/pubmed/28653623	Showalter MR, Hatakeyama J, Cajka T, VanderVorst K, Carraway KL, Fiehn O; Reproducibility Project: Cancer Biology..	Elife. 2017 Jun 27;6. pii: e26030. doi: 10.7554/eLife.26030.	Elife. 2017	PubMed	citation	PMID:28653623 | PMCID:PMC5487214	pubmed	28653623	create date:2017/06/28 | first author:Showalter MR
Replication Study: Inhibition of BET recruitment to chromatin as an effective treatment for MLL-fusion leukaemia.	/pubmed/28653617	Shan X, Fung JJ, Kosaka A, Danet-Desnoyers G; Reproducibility Project: Cancer Biology..	Elife. 2017 Jun 27;6. pii: e25306. doi: 10.7554/eLife.25306.	Elife. 2017	PubMed	citation	PMID:28653617 | PMCID:PMC5487217	pubmed	28653617	create date:2017/06/28 | first author:Shan X
Reproducibility2020: Progress and priorities.	/pubmed/28620458	Freedman LP, Venugopalan G, Wisman R.	F1000Res. 2017 May 2;6:604. doi: 10.12688/f1000research.11334.1. eCollection 2017. Review.	F1000Res. 2017	PubMed	citation	PMID:28620458 | PMCID:PMC5461896	pubmed	28620458	create date:2017/06/18 | first author:Freedman LP
Publish houses of brick, not mansions of straw.	/pubmed/28541345	Kaelin WG Jr.	Nature. 2017 May 23;545(7655):387. doi: 10.1038/545387a. No abstract available.	Nature. 2017	PubMed	citation	PMID:28541345	pubmed	28541345	create date:2017/05/26 | first author:Kaelin WG Jr
Common pitfalls in preclinical cancer target validation.	/pubmed/28524181	Kaelin WG Jr.	Nat Rev Cancer. 2017 Jul;17(7):425-440. doi: 10.1038/nrc.2017.32. Epub 2017 May 19.	Nat Rev Cancer. 2017	PubMed	citation	PMID:28524181	pubmed	28524181	create date:2017/05/20 | first author:Kaelin WG Jr
Matched preclinical designs for improved translatability.	/pubmed/28490671	Aittokallio T, Scherer A, Poutanen M, Freedman LP.	Sci Transl Med. 2017 May 10;9(389). pii: eaal4101. doi: 10.1126/scitranslmed.aal4101.	Sci Transl Med. 2017	PubMed	citation	PMID:28490671	pubmed	28490671	create date:2017/05/12 | first author:Aittokallio T
Defending Biomedical Science in an Era of Threatened Funding.	/pubmed/28459974	Ioannidis JPA.	JAMA. 2017 Jun 27;317(24):2483-2484. doi: 10.1001/jama.2017.5811. No abstract available.	JAMA. 2017	PubMed	citation	PMID:28459974	pubmed	28459974	create date:2017/05/02 | first author:Ioannidis JPA
Addressing reproducibility in single-laboratory phenotyping experiments.	/pubmed/28448068	Kafkafi N, Golani I, Jaljuli I, Morgan H, Sarig T, W√ºrbel H, Yaacoby S, Benjamini Y.	Nat Methods. 2017 Apr 27;14(5):462-464. doi: 10.1038/nmeth.4259. No abstract available.	Nat Methods. 2017	PubMed	citation	PMID:28448068	pubmed	28448068	create date:2017/04/28 | first author:Kafkafi N
No publication without confirmation.	/pubmed/28230138	Mogil JS, Macleod MR.	Nature. 2017 Feb 22;542(7642):409-411. doi: 10.1038/542409a. No abstract available.	Nature. 2017	PubMed	citation	PMID:28230138	pubmed	28230138	create date:2017/02/24 | first author:Mogil JS
Meta-assessment of bias in science.	/pubmed/28320937	Fanelli D, Costas R, Ioannidis JP.	Proc Natl Acad Sci U S A. 2017 Apr 4;114(14):3714-3719. doi: 10.1073/pnas.1618569114. Epub 2017 Mar 20.	Proc Natl Acad Sci U S A. 2017	PubMed	citation	PMID:28320937 | PMCID:PMC5389310	pubmed	28320937	create date:2017/03/23 | first author:Fanelli D
Cancer reproducibility project releases first results.	/pubmed/28102271	Baker M, Dolgin E.	Nature. 2017 Jan 18;541(7637):269-270. doi: 10.1038/541269a. No abstract available.	Nature. 2017	PubMed	citation	PMID:28102271	pubmed	28102271	create date:2017/01/20 | first author:Baker M
Replication Study: BET bromodomain inhibition as a therapeutic strategy to target c-Myc.	/pubmed/28100400	Aird F, Kandela I, Mantis C; Reproducibility Project: Cancer Biology..	Elife. 2017 Jan 19;6. pii: e21253. doi: 10.7554/eLife.21253.	Elife. 2017	PubMed	citation	PMID:28100400 | PMCID:PMC5245966	pubmed	28100400	create date:2017/01/20 | first author:Aird F
Replication Study: Discovery and preclinical validation of drug indications using compendia of public gene expression data.	/pubmed/28100397	Kandela I, Aird F; Reproducibility Project: Cancer Biology..	Elife. 2017 Jan 19;6. pii: e17044. doi: 10.7554/eLife.17044.	Elife. 2017	PubMed	citation	PMID:28100397 | PMCID:PMC5245962	pubmed	28100397	create date:2017/01/20 | first author:Kandela I
Replication Study: Coadministration of a tumor-penetrating peptide enhances the efficacy of cancer drugs.	/pubmed/28100395	Mantis C, Kandela I, Aird F; Reproducibility Project: Cancer Biology..	Elife. 2017 Jan 19;6. pii: e17584. doi: 10.7554/eLife.17584.	Elife. 2017	PubMed	citation	PMID:28100395 | PMCID:PMC5245960	pubmed	28100395	create date:2017/01/20 | first author:Mantis C
Replication Study: Melanoma genome sequencing reveals frequent PREX2 mutations.	/pubmed/28100394	Horrigan SK, Courville P, Sampey D, Zhou F, Cai S; Reproducibility Project: Cancer Biology..	Elife. 2017 Jan 19;6. pii: e21634. doi: 10.7554/eLife.21634.	Elife. 2017	PubMed	citation	PMID:28100394 | PMCID:PMC5245968	pubmed	28100394	create date:2017/01/20 | first author:Horrigan SK
Replication Study: The CD47-signal regulatory protein alpha (SIRPa) interaction is a therapeutic target for human solid tumors.	/pubmed/28100392	Horrigan SK; Reproducibility Project: Cancer Biology..	Elife. 2017 Jan 19;6. pii: e18173. doi: 10.7554/eLife.18173.	Elife. 2017	PubMed	citation	PMID:28100392 | PMCID:PMC5245970	pubmed	28100392	create date:2017/01/20 | first author:Horrigan SK
Safikhani et al. reply.	/pubmed/27905430	Safikhani Z, El-Hachem N, Smirnov P, Freeman M, Goldenberg A, Birkbak NJ, Beck AH, Aerts HJ, Quackenbush J, Haibe-Kains B.	Nature. 2016 Nov 30;540(7631):E2-E4. doi: 10.1038/nature19839. No abstract available.	Nature. 2016	PubMed	citation	PMID:27905430	pubmed	27905430	create date:2016/12/03 | first author:Safikhani Z
Safikhani et al. reply.	/pubmed/27905423	Safikhani Z, El-Hachem N, Smirnov P, Freeman M, Goldenberg A, Birkbak NJ, Beck AH, Aerts HJ, Quackenbush J, Haibe-Kains B.	Nature. 2016 Nov 30;540(7631):E11-E12. doi: 10.1038/nature20581. No abstract available.	Nature. 2016	PubMed	citation	PMID:27905423	pubmed	27905423	create date:2016/12/03 | first author:Safikhani Z
Consistency in drug response profiling.	/pubmed/27905421	Mpindi JP, Yadav B, Ã–stling P, Gautam P, Malani D, MurumÃ¤gi A, Hirasawa A, Kangaspeska S, Wennerberg K, Kallioniemi O, Aittokallio T.	Nature. 2016 Nov 30;540(7631):E5-E6. doi: 10.1038/nature20171. No abstract available.	Nature. 2016	PubMed	citation	PMID:27905421	pubmed	27905421	create date:2016/12/03 | first author:Mpindi JP
Drug response consistency in CCLE and CGP.	/pubmed/27905419	Bouhaddou M, DiStefano MS, Riesel EA, Carrasco E, Holzapfel HY, Jones DC, Smith GR, Stern AD, Somani SS, Thompson TV, Birtwistle MR.	Nature. 2016 Nov 30;540(7631):E9-E10. doi: 10.1038/nature20580. No abstract available.	Nature. 2016	PubMed	citation	PMID:27905419 | PMCID:PMC5554885	pubmed	27905419	create date:2016/12/03 | first author:Bouhaddou M
Safikhani et al. reply.	/pubmed/27905416	Safikhani Z, El-Hachem N, Smirnov P, Freeman M, Goldenberg A, Birkbak NJ, Beck AH, Aerts HJ, Quackenbush J, Haibe-Kains B.	Nature. 2016 Nov 30;540(7631):E6-E8. doi: 10.1038/nature20172. No abstract available.	Nature. 2016	PubMed	citation	PMID:27905416	pubmed	27905416	create date:2016/12/03 | first author:Safikhani Z
Consistency in large pharmacogenomic studies.	/pubmed/27905415	Geeleher P, Gamazon ER, Seoighe C, Cox NJ, Huang RS.	Nature. 2016 Nov 30;540(7631):E1-E2. doi: 10.1038/nature19838. No abstract available.	Nature. 2016	PubMed	citation	PMID:27905415	pubmed	27905415	create date:2016/12/03 | first author:Geeleher P
METHODS TO ENSURE THE REPRODUCIBILITY OF BIOMEDICAL RESEARCH.	/pubmed/27896967	Karczewski KJ, Tatonetti NP, Manrai AK, Patel CJ, Titus Brown C, Ioannidis JPA.	Pac Symp Biocomput. 2017;22:117-119. doi: 10.1142/9789813207813_0012.	Pac Symp Biocomput. 2017	PubMed	citation	PMID:27896967	pubmed	27896967	create date:2016/11/30 | first author:Karczewski KJ
Origin of the U87MG glioma cell line: Good news and bad news.	/pubmed/27582061	Allen M, Bjerke M, Edlund H, Nelander S, Westermark B.	Sci Transl Med. 2016 Aug 31;8(354):354re3. doi: 10.1126/scitranslmed.aaf6853.	Sci Transl Med. 2016	PubMed	citation	PMID:27582061	pubmed	27582061	create date:2016/09/02 | first author:Allen M
Assessment of pharmacogenomic agreement.	/pubmed/27408686	Safikhani Z, El-Hachem N, Quevedo R, Smirnov P, Goldenberg A, Juul Birkbak N, Mason C, Hatzis C, Shi L, Aerts HJ, Quackenbush J, Haibe-Kains B.	F1000Res. 2016 May 9;5:825. doi: 10.12688/f1000research.8705.1. eCollection 2016.	F1000Res. 2016	PubMed	citation	PMID:27408686 | PMCID:PMC4926729	pubmed	27408686	create date:2016/07/14 | first author:Safikhani Z
[Letter to the Editor] The need for improved education and training in research antibody usage and validation practices.	/pubmed/27401669	Freedman LP, Gibson MC, Bradbury AR, Buchberg AM, Davis D, Dolled-Filhart MP, Lund-Johansen F, Rimm DL.	Biotechniques. 2016 Jul 1;61(1):16-8. doi: 10.2144/000114431. eCollection 2016.	Biotechniques. 2016	PubMed	citation	PMID:27401669	pubmed	27401669	create date:2016/07/13 | first author:Freedman LP
1,500 scientists lift the lid on reproducibility.	/pubmed/27225100	Baker M.	Nature. 2016 May 26;533(7604):452-4. doi: 10.1038/533452a. No abstract available.	Nature. 2016	PubMed	citation	PMID:27225100	pubmed	27225100	create date:2016/05/27 | first author:Baker M
Reality check on reproducibility.	/pubmed/27225078	[No authors listed]	Nature. 2016 May 26;533(7604):437. doi: 10.1038/533437a. No abstract available.	Nature. 2016	PubMed	citation	PMID:27225078	pubmed	27225078	create date:2016/05/27
Evaluating replicability of laboratory experiments in economics.	/pubmed/26940865	Camerer CF, Dreber A, Forsell E, Ho TH, Huber J, Johannesson M, Kirchler M, Almenberg J, Altmejd A, Chan T, Heikensten E, Holzmeister F, Imai T, Isaksson S, Nave G, Pfeiffer T, Razen M, Wu H.	Science. 2016 Mar 25;351(6280):1433-6. doi: 10.1126/science.aaf0918. Epub 2016 Mar 3.	Science. 2016	PubMed	citation	PMID:26940865	pubmed	26940865	create date:2016/03/05 | first author:Camerer CF
Irreproducibility in Preclinical Biomedical Research: Perceptions, Uncertainties, and Knowledge Gaps.	/pubmed/26776451	Jarvis MF, Williams M.	Trends Pharmacol Sci. 2016 Apr;37(4):290-302. doi: 10.1016/j.tips.2015.12.001. Epub 2016 Jan 6. Review.	Trends Pharmacol Sci. 2016	PubMed	citation	PMID:26776451	pubmed	26776451	create date:2016/01/19 | first author:Jarvis MF
Pharmacogenomic agreement between two cancer cell line data sets.	/pubmed/26570998	Cancer Cell Line Encyclopedia Consortium.; Genomics of Drug Sensitivity in Cancer Consortium..	Nature. 2015 Dec 3;528(7580):84-7. doi: 10.1038/nature15736. Epub 2015 Nov 16.	Nature. 2015	PubMed	citation	PMID:26570998	pubmed	26570998	create date:2015/11/17 | first author:Cancer Cell Line Encyclopedia Consortium.
The culture of cell culture practices and authentication--Results from a 2015 Survey.	/pubmed/26458546	Freedman LP, Gibson MC, Wisman R, Ethier SP, Soule HR, Reid YA, Neve RM.	Biotechniques. 2015 Oct 1;59(4):189-90, 192. doi: 10.2144/000114344. eCollection 2015 Oct. No abstract available.	Biotechniques. 2015	PubMed	citation	PMID:26458546	pubmed	26458546	create date:2015/10/16 | first author:Freedman LP
Robust research: Institutions must do their part for reproducibility.	/pubmed/26333454	Begley CG, Buchan AM, Dirnagl U.	Nature. 2015 Sep 3;525(7567):25-7. doi: 10.1038/525025a. No abstract available.	Nature. 2015	PubMed	citation	PMID:26333454	pubmed	26333454	create date:2015/09/04 | first author:Begley CG
PSYCHOLOGY. Estimating the reproducibility of psychological science.	/pubmed/26315443	Open Science Collaboration..	Science. 2015 Aug 28;349(6251):aac4716. doi: 10.1126/science.aac4716.	Science. 2015	PubMed	citation	PMID:26315443	pubmed	26315443	create date:2015/09/01 | first author:Open Science Collaboration.
The Long Way From Î±-Error Control to Validity Proper: Problems With a Short-Sighted False-Positive Debate.	/pubmed/26168128	Fiedler K, Kutzner F, Krueger JI.	Perspect Psychol Sci. 2012 Nov;7(6):661-9. doi: 10.1177/1745691612462587.	Perspect Psychol Sci. 2012	PubMed	citation	PMID:26168128	pubmed	26168128	create date:2012/11/01 | first author:Fiedler K
An Open, Large-Scale, Collaborative Effort to Estimate the Reproducibility of Psychological Science.	/pubmed/26168127	Open Science Collaboration..	Perspect Psychol Sci. 2012 Nov;7(6):657-60. doi: 10.1177/1745691612462588.	Perspect Psychol Sci. 2012	PubMed	citation	PMID:26168127	pubmed	26168127	create date:2012/11/01 | first author:Open Science Collaboration.
Why Science Is Not Necessarily Self-Correcting.	/pubmed/26168125	Ioannidis JP.	Perspect Psychol Sci. 2012 Nov;7(6):645-54. doi: 10.1177/1745691612464056.	Perspect Psychol Sci. 2012	PubMed	citation	PMID:26168125	pubmed	26168125	create date:2012/11/01 | first author:Ioannidis JP
Psychologists Are Open to Change, yet Wary of Rules.	/pubmed/26168123	Fuchs HM, Jenny M, Fiedler S.	Perspect Psychol Sci. 2012 Nov;7(6):639-42. doi: 10.1177/1745691612459521.	Perspect Psychol Sci. 2012	PubMed	citation	PMID:26168123	pubmed	26168123	create date:2012/11/01 | first author:Fuchs HM
An Agenda for Purely Confirmatory Research.	/pubmed/26168122	Wagenmakers EJ, Wetzels R, Borsboom D, van der Maas HL, Kievit RA.	Perspect Psychol Sci. 2012 Nov;7(6):632-8. doi: 10.1177/1745691612463078.	Perspect Psychol Sci. 2012	PubMed	citation	PMID:26168122	pubmed	26168122	create date:2012/11/01 | first author:Wagenmakers EJ
Scientific Utopia: II. Restructuring Incentives and Practices to Promote Truth Over Publishability.	/pubmed/26168121	Nosek BA, Spies JR, Motyl M.	Perspect Psychol Sci. 2012 Nov;7(6):615-31. doi: 10.1177/1745691612459058.	Perspect Psychol Sci. 2012	PubMed	citation	PMID:26168121	pubmed	26168121	create date:2012/11/01 | first author:Nosek BA
Rewarding Replications: A Sure and Simple Way to Improve Psychological Science.	/pubmed/26168120	Koole SL, Lakens D.	Perspect Psychol Sci. 2012 Nov;7(6):608-14. doi: 10.1177/1745691612462586.	Perspect Psychol Sci. 2012	PubMed	citation	PMID:26168120	pubmed	26168120	create date:2012/11/01 | first author:Koole SL
Harnessing the Undiscovered Resource of Student Research Projects.	/pubmed/26168119	Grahe JE, Reifman A, Hermann AD, Walker M, Oleson KC, Nario-Redmond M, Wiebe RP.	Perspect Psychol Sci. 2012 Nov;7(6):605-7. doi: 10.1177/1745691612459057.	Perspect Psychol Sci. 2012	PubMed	citation	PMID:26168119	pubmed	26168119	create date:2012/11/01 | first author:Grahe JE
Teaching Replication.	/pubmed/26168118	Frank MC, Saxe R.	Perspect Psychol Sci. 2012 Nov;7(6):600-4. doi: 10.1177/1745691612460686.	Perspect Psychol Sci. 2012	PubMed	citation	PMID:26168118	pubmed	26168118	create date:2012/11/01 | first author:Frank MC
The Psychology of Replication and Replication in Psychology.	/pubmed/26168115	Francis G.	Perspect Psychol Sci. 2012 Nov;7(6):585-94. doi: 10.1177/1745691612459520.	Perspect Psychol Sci. 2012	PubMed	citation	PMID:26168115	pubmed	26168115	create date:2012/11/01 | first author:Francis G
Low Hopes, High Expectations: Expectancy Effects and the Replicability of Behavioral Experiments.	/pubmed/26168114	Klein O, Doyen S, Leys C, MagalhÃ£es de Saldanha da Gama PA, Miller S, Questienne L, Cleeremans A.	Perspect Psychol Sci. 2012 Nov;7(6):572-84. doi: 10.1177/1745691612463704.	Perspect Psychol Sci. 2012	PubMed	citation	PMID:26168114	pubmed	26168114	create date:2012/11/01 | first author:Klein O
A Vast Graveyard of Undead Theories: Publication Bias and Psychological Science's Aversion to the Null.	/pubmed/26168112	Ferguson CJ, Heene M.	Perspect Psychol Sci. 2012 Nov;7(6):555-61. doi: 10.1177/1745691612459059.	Perspect Psychol Sci. 2012	PubMed	citation	PMID:26168112	pubmed	26168112	create date:2012/11/01 | first author:Ferguson CJ
The Rules of the Game Called Psychological Science.	/pubmed/26168111	Bakker M, van Dijk A, Wicherts JM.	Perspect Psychol Sci. 2012 Nov;7(6):543-54. doi: 10.1177/1745691612459060.	Perspect Psychol Sci. 2012	PubMed	citation	PMID:26168111	pubmed	26168111	create date:2012/11/01 | first author:Bakker M
Replications in Psychology Research: How Often Do They Really Occur?	/pubmed/26168110	Makel MC, Plucker JA, Hegarty B.	Perspect Psychol Sci. 2012 Nov;7(6):537-42. doi: 10.1177/1745691612460688.	Perspect Psychol Sci. 2012	PubMed	citation	PMID:26168110	pubmed	26168110	create date:2012/11/01 | first author:Makel MC
Editors' Introduction to the Special Section on Replicability in Psychological Science: A Crisis of Confidence?	/pubmed/26168108	Pashler H, Wagenmakers EJ.	Perspect Psychol Sci. 2012 Nov;7(6):528-30. doi: 10.1177/1745691612465253. No abstract available.	Perspect Psychol Sci. 2012	PubMed	citation	PMID:26168108	pubmed	26168108	create date:2012/11/01 | first author:Pashler H
Know Thy Cells: Improving Biomedical Research Reproducibility.	/pubmed/26136474	Freedman LP.	Sci Transl Med. 2015 Jul 1;7(294):294ed7. doi: 10.1126/scitranslmed.aac7112. No abstract available.	Sci Transl Med. 2015	PubMed	citation	PMID:26136474	pubmed	26136474	create date:2015/07/03 | first author:Freedman LP
The Economics of Reproducibility in Preclinical Research.	/pubmed/26057340	Freedman LP, Cockburn IM, Simcoe TS.	PLoS Biol. 2015 Jun 9;13(6):e1002165. doi: 10.1371/journal.pbio.1002165. eCollection 2015 Jun.	PLoS Biol. 2015	PubMed	citation	PMID:26057340 | PMCID:PMC4461318	pubmed	26057340	create date:2015/06/10 | first author:Freedman LP
Reproducibility: changing the policies and culture of cell line authentication.	/pubmed/26020501	Freedman LP, Gibson MC, Ethier SP, Soule HR, Neve RM, Reid YA.	Nat Methods. 2015 Jun;12(6):493-7. doi: 10.1038/nmeth.3403. No abstract available.	Nat Methods. 2015	PubMed	citation	PMID:26020501	pubmed	26020501	create date:2015/05/29 | first author:Freedman LP
The impact of preclinical irreproducibility on drug development.	/pubmed/25670378	Freedman LP, Gibson MC.	Clin Pharmacol Ther. 2015 Jan;97(1):16-8. doi: 10.1002/cpt.9. Epub 2014 Dec 2.	Clin Pharmacol Ther. 2015	PubMed	citation	PMID:25670378	pubmed	25670378	create date:2015/02/12 | first author:Freedman LP
An open investigation of the reproducibility of cancer biology research.	/pubmed/25490932	Errington TM, Iorns E, Gunn W, Tan FE, Lomax J, Nosek BA.	Elife. 2014 Dec 10;3. doi: 10.7554/eLife.04333.	Elife. 2014	PubMed	citation	PMID:25490932 | PMCID:PMC4270077	pubmed	25490932	create date:2014/12/11 | first author:Errington TM
Drug discoverers chart path to tackling data irreproducibility.	/pubmed/25435205	Dolgin E.	Nat Rev Drug Discov. 2014 Dec;13(12):875-6. doi: 10.1038/nrd4488. No abstract available.	Nat Rev Drug Discov. 2014	PubMed	citation	PMID:25435205	pubmed	25435205	create date:2014/12/02 | first author:Dolgin E
Impact of temporal variation on design and analysis of mouse knockout phenotyping studies.	/pubmed/25343444	Karp NA, Speak AO, White JK, Adams DJ, Hrab√© de Angelis M, H√©rault Y, Mott RF.	PLoS One. 2014 Oct 24;9(10):e111239. doi: 10.1371/journal.pone.0111239. eCollection 2014.	PLoS One. 2014	PubMed	citation	PMID:25343444 | PMCID:PMC4208881	pubmed	25343444	create date:2014/10/25 | first author:Karp NA
How to make more published research true.	/pubmed/25334033	Ioannidis JP.	PLoS Med. 2014 Oct 21;11(10):e1001747. doi: 10.1371/journal.pmed.1001747. eCollection 2014 Oct.	PLoS Med. 2014	PubMed	citation	PMID:25334033 | PMCID:PMC4204808	pubmed	25334033	create date:2014/10/22 | first author:Ioannidis JP
The increasing urgency for standards in basic biologic research.	/pubmed/25035389	Freedman LP, Inglese J.	Cancer Res. 2014 Aug 1;74(15):4024-9. doi: 10.1158/0008-5472.CAN-14-0925. Epub 2014 Jul 17.	Cancer Res. 2014	PubMed	citation	PMID:25035389 | PMCID:PMC4975040	pubmed	25035389	create date:2014/07/19 | first author:Freedman LP
Enhancing reproducibility in cancer drug screening: how do we move forward?	/pubmed/25015668	Hatzis C, Bedard PL, Birkbak NJ, Beck AH, Aerts HJ, Stem DF, Shi L, Clarke R, Quackenbush J, Haibe-Kains B.	Cancer Res. 2014 Aug 1;74(15):4016-23. doi: 10.1158/0008-5472.CAN-14-0725. Epub 2014 Jul 11. Review. Erratum in: Cancer Res. 2014 Sep 15;74(18):5348. Stern, David F [corrected to Stem, David F].	Cancer Res. 2014	PubMed	citation	PMID:25015668 | PMCID:PMC4119520	pubmed	25015668	create date:2014/07/13 | first author:Hatzis C
Preclinical research: Design animal studies better.	/pubmed/24899295	Macleod MR.	Nature. 2014 Jun 5;510(7503):35. doi: 10.1038/510035a. No abstract available.	Nature. 2014	PubMed	citation	PMID:24899295	pubmed	24899295	create date:2014/06/06 | first author:Macleod MR
Preclinical research: Make mouse studies work.	/pubmed/24678540	Perrin S.	Nature. 2014 Mar 27;507(7493):423-5. No abstract available.	Nature. 2014	PubMed	citation	PMID:24678540	pubmed	24678540	create date:2014/03/29 | first author:Perrin S
Increasing value and reducing waste in research design, conduct, and analysis.	/pubmed/24411645	Ioannidis JP, Greenland S, Hlatky MA, Khoury MJ, Macleod MR, Moher D, Schulz KF, Tibshirani R.	Lancet. 2014 Jan 11;383(9912):166-75. doi: 10.1016/S0140-6736(13)62227-8. Epub 2014 Jan 8.	Lancet. 2014	PubMed	citation	PMID:24411645 | PMCID:PMC4697939	pubmed	24411645	create date:2014/01/15 | first author:Ioannidis JP
Biomedical research: increasing value, reducing waste.	/pubmed/24411643	Macleod MR, Michie S, Roberts I, Dirnagl U, Chalmers I, Ioannidis JP, Al-Shahi Salman R, Chan AW, Glasziou P.	Lancet. 2014 Jan 11;383(9912):101-4. doi: 10.1016/S0140-6736(13)62329-6. Epub 2014 Jan 8. No abstract available.	Lancet. 2014	PubMed	citation	PMID:24411643	pubmed	24411643	create date:2014/01/15 | first author:Macleod MR
Inconsistency in large pharmacogenomic studies.	/pubmed/24284626	Haibe-Kains B, El-Hachem N, Birkbak NJ, Jin AC, Beck AH, Aerts HJ, Quackenbush J.	Nature. 2013 Dec 19;504(7480):389-93. doi: 10.1038/nature12831. Epub 2013 Nov 27.	Nature. 2013	PubMed	citation	PMID:24284626 | PMCID:PMC4237165	pubmed	24284626	create date:2013/11/29 | first author:Haibe-Kains B
False biomarker discovery due to reactivity of a commercial ELISA for CUZD1 with cancer antigen CA125.	/pubmed/24097894	Prassas I, Brinc D, Farkona S, Leung F, Dimitromanolakis A, Chrystoja CC, Brand R, Kulasingam V, Blasutig IM, Diamandis EP.	Clin Chem. 2014 Feb;60(2):381-8. doi: 10.1373/clinchem.2013.215236. Epub 2013 Oct 4.	Clin Chem. 2014	PubMed	citation	PMID:24097894	pubmed	24097894	create date:2013/10/08 | first author:Prassas I
Evaluation of excess significance bias in animal studies of neurological diseases.	/pubmed/23874156	Tsilidis KK, Panagiotou OA, Sena ES, Aretouli E, Evangelou E, Howells DW, Al-Shahi Salman R, Macleod MR, Ioannidis JP.	PLoS Biol. 2013 Jul;11(7):e1001609. doi: 10.1371/journal.pbio.1001609. Epub 2013 Jul 16.	PLoS Biol. 2013	PubMed	citation	PMID:23874156 | PMCID:PMC3712913	pubmed	23874156	create date:2013/07/23 | first author:Tsilidis KK
Six red flags for suspect work.	/pubmed/23698428	Begley CG.	Nature. 2013 May 23;497(7450):433-4. doi: 10.1038/497433a. No abstract available.	Nature. 2013	PubMed	citation	PMID:23698428	pubmed	23698428	create date:2013/05/24 | first author:Begley CG
A survey on data reproducibility in cancer research provides insights into our limited ability to translate findings from the laboratory to the clinic.	/pubmed/23691000	Mobley A, Linder SK, Braeuer R, Ellis LM, Zwelling L.	PLoS One. 2013 May 15;8(5):e63221. doi: 10.1371/journal.pone.0063221. Print 2013.	PLoS One. 2013	PubMed	citation	PMID:23691000 | PMCID:PMC3655010	pubmed	23691000	create date:2013/05/22 | first author:Mobley A
Evaluation of excess statistical significance in meta-analyses of 98 biomarker associations with cancer risk.	/pubmed/23090067	Tsilidis KK, Papatheodorou SI, Evangelou E, Ioannidis JP.	J Natl Cancer Inst. 2012 Dec 19;104(24):1867-78. doi: 10.1093/jnci/djs437. Epub 2012 Oct 22.	J Natl Cancer Inst. 2012	PubMed	citation	PMID:23090067	pubmed	23090067	create date:2012/10/24 | first author:Tsilidis KK
Drug development: Raise standards for preclinical cancer research.	/pubmed/22460880	Begley CG, Ellis LM.	Nature. 2012 Mar 28;483(7391):531-3. doi: 10.1038/483531a. No abstract available.	Nature. 2012	PubMed	citation	PMID:22460880	pubmed	22460880	create date:2012/03/31 | first author:Begley CG
Tracking replicability as a method of post-publication open evaluation.	/pubmed/22403538	Hartshorne JK, Schachner A.	Front Comput Neurosci. 2012 Mar 5;6:8. doi: 10.3389/fncom.2012.00008. eCollection 2012.	Front Comput Neurosci. 2012	PubMed	citation	PMID:22403538 | PMCID:PMC3293145	pubmed	22403538	create date:2012/03/10 | first author:Hartshorne JK
Believe it or not: how much can we rely on published data on potential drug targets?	/pubmed/21892149	Prinz F, Schlange T, Asadullah K.	Nat Rev Drug Discov. 2011 Aug 31;10(9):712. doi: 10.1038/nrd3439-c1. No abstract available.	Nat Rev Drug Discov. 2011	PubMed	citation	PMID:21892149	pubmed	21892149	create date:2011/09/06 | first author:Prinz F
Reforming science: structural reforms.	/pubmed/22184420	Fang FC, Casadevall A.	Infect Immun. 2012 Mar;80(3):897-901. doi: 10.1128/IAI.06184-11. Epub 2011 Dec 19.	Infect Immun. 2012	PubMed	citation	PMID:22184420 | PMCID:PMC3294664	pubmed	22184420	create date:2011/12/21 | first author:Fang FC
Reforming science: methodological and cultural reforms.	/pubmed/22184414	Casadevall A, Fang FC.	Infect Immun. 2012 Mar;80(3):891-6. doi: 10.1128/IAI.06183-11. Epub 2011 Dec 19.	Infect Immun. 2012	PubMed	citation	PMID:22184414 | PMCID:PMC3294645	pubmed	22184414	create date:2011/12/21 | first author:Casadevall A
Do pressures to publish increase scientists' bias? An empirical support from US States Data.	/pubmed/20422014	Fanelli D.	PLoS One. 2010 Apr 21;5(4):e10271. doi: 10.1371/journal.pone.0010271.	PLoS One. 2010	PubMed	citation	PMID:20422014 | PMCID:PMC2858206	pubmed	20422014	create date:2010/04/28 | first author:Fanelli D
Positive" results increase down the Hierarchy of the Sciences.	/pubmed/20383332	Fanelli D.	PLoS One. 2010 Apr 7;5(4):e10068. doi: 10.1371/journal.pone.0010068.	PLoS One. 2010	PubMed	citation	PMID:20383332 | PMCID:PMC2850928	pubmed	20383332	create date:2010/04/13 | first author:Fanelli D
Publication bias in reports of animal stroke studies leads to major overstatement of efficacy.	/pubmed/20361022	Sena ES, van der Worp HB, Bath PM, Howells DW, Macleod MR.	PLoS Biol. 2010 Mar 30;8(3):e1000344. doi: 10.1371/journal.pbio.1000344.	PLoS Biol. 2010	PubMed	citation	PMID:20361022 | PMCID:PMC2846857	pubmed	20361022	create date:2010/04/03 | first author:Sena ES
How many scientists fabricate and falsify research? A systematic review and meta-analysis of survey data.	/pubmed/19478950	Fanelli D.	PLoS One. 2009 May 29;4(5):e5738. doi: 10.1371/journal.pone.0005738. Review.	PLoS One. 2009	PubMed	citation	PMID:19478950 | PMCID:PMC2685008	pubmed	19478950	create date:2009/05/30 | first author:Fanelli D
Almost all articles on cancer prognostic markers report statistically significant results.	/pubmed/17981458	Kyzas PA, Denaxa-Kyza D, Ioannidis JP.	Eur J Cancer. 2007 Nov;43(17):2559-79. Epub 2007 Nov 5. Review.	Eur J Cancer. 2007	PubMed	citation	PMID:17981458	pubmed	17981458	create date:2007/11/06 | first author:Kyzas PA
Publication bias in the medical literature: a review by a Canadian Research Ethics Board.	/pubmed/17470890	Hall R, de Antueno C, Webber A; Canadian Research Ethics Board..	Can J Anaesth. 2007 May;54(5):380-8. Review.	Can J Anaesth. 2007	PubMed	citation	PMID:17470890	pubmed	17470890	create date:2007/05/02 | first author:Hall R
Anti-Epo receptor antibodies do not predict Epo receptor expression.	/pubmed/16249375	Elliott S, Busse L, Bass MB, Lu H, Sarosi I, Sinclair AM, Spahr C, Um M, Van G, Begley CG.	Blood. 2006 Mar 1;107(5):1892-5. Epub 2005 Oct 25. Erratum in: Blood. 2006 May 1;107(9):3454.	Blood. 2006	PubMed	citation	PMID:16249375	pubmed	16249375	create date:2005/10/27 | first author:Elliott S
Why most published research findings are false.	/pubmed/16060722	Ioannidis JP.	PLoS Med. 2005 Aug;2(8):e124. Epub 2005 Aug 30.	PLoS Med. 2005	PubMed	citation	PMID:16060722 | PMCID:PMC1182327	pubmed	16060722	create date:2005/08/03 | first author:Ioannidis JP
Selective reporting biases in cancer prognostic factor studies.	/pubmed/16030302	Kyzas PA, Loizou KT, Ioannidis JP.	J Natl Cancer Inst. 2005 Jul 20;97(14):1043-55.	J Natl Cancer Inst. 2005	PubMed	citation	PMID:16030302	pubmed	16030302	create date:2005/07/21 | first author:Kyzas PA
Contradicted and initially stronger effects in highly cited clinical research.	/pubmed/16014596	Ioannidis JP.	JAMA. 2005 Jul 13;294(2):218-28.	JAMA. 2005	PubMed	citation	PMID:16014596	pubmed	16014596	create date:2005/07/15 | first author:Ioannidis JP
Systematic review of publication bias in studies on publication bias.	/pubmed/15937056	Dubben HH, Beck-Bornholdt HP.	BMJ. 2005 Aug 20;331(7514):433-4. Epub 2005 Jun 3. Review. No abstract available.	BMJ. 2005	PubMed	citation	PMID:15937056 | PMCID:PMC1188109	pubmed	15937056	create date:2005/06/07 | first author:Dubben HH
Investigating variation in replicability: A “many labs” replication project.	N/A	Klein RA, Ratliff KA, Vianello M, Adams RB Jr Bahník Š, Bernstein MJ, Bocian K, Brandt MJ, Brooks B, Brumbaugh CC, Cemalcilar Z, Chandler J, Cheong W, Davis WE, Devos T, Eisner M, Frankowska N, Furrow D, Galliani EM, Hasselman F, Hicks JA, Hovermale JF, Hunt SJ, Huntsinger JR, IJzerman H, John M-S, Joy-Gaba JA, Barry Kappes H, Krueger LE, Kurtz J, Levitan CA, Mallett RK, Morris WL, Nelson AJ, Nie…	Soc Psychol 2014;45(3):142–52.	Soc Psychol 2014	N/A	citation	N/A	N/A	N/A			first author: Klein RA
Scientific data audit—A key management tool	N/A	Glick JL	Accountability in Research 1992;2(3):153-168	Accountability in Research. 1992	N/A	citation	N/A	N/A	N/A			first author: Glick JL

## Sheet: 5) Combined
Combined
Title	URL	Description	Details	ShortDetails	Resource	Type	Identifiers	Db	EntrezUID	Properties				Comment		Relevant
Opinion: Is science really facing a reproducibility crisis, and do we need it to?	/pubmed/29531051	Fanelli D.	Proc Natl Acad Sci U S A. 2018 Mar 13;115(11):2628-2631. doi: 10.1073/pnas.1708272114.	Proc Natl Acad Sci U S A. 2018	PubMed	citation	PMID:29531051	pubmed	29531051	create date:2018/03/14 | first author:Fanelli D				Opinion		1	Overview
Reproducible preclinical research-Is embracing variability the answer?	/pubmed/29505576	Karp NA.	PLoS Biol. 2018 Mar 5;16(3):e2005413. doi: 10.1371/journal.pbio.2005413. eCollection 2018 Mar.	PLoS Biol. 2018	PubMed	citation	PMID:29505576 | PMCID:PMC5837077	pubmed	29505576	create date:2018/03/06 | first author:Karp NA				Comment		1	Methodology: Experimental heterogenisation
Reproducibility and replicability in zebrafish behavioral neuroscience research.	/pubmed/29481830	Gerlai R.	Pharmacol Biochem Behav. 2018 Feb 23. pii: S0091-3057(17)30608-1. doi: 10.1016/j.pbb.2018.02.005. [Epub ahead of print] Review.	Pharmacol Biochem Behav. 2018	PubMed	citation	PMID:29481830	pubmed	29481830	create date:2018/02/27 | first author:Gerlai R				Review		1	Overview: Methods/ Publication bias
Reproducibility of preclinical animal research improves with heterogeneity of study samples.	/pubmed/29470495	Voelkl B, Vogt L, Sena ES, W√ºrbel H.	PLoS Biol. 2018 Feb 22;16(2):e2003693. doi: 10.1371/journal.pbio.2003693. eCollection 2018 Feb.	PLoS Biol. 2018	PubMed	citation	PMID:29470495 | PMCID:PMC5823461	pubmed	29470495	create date:2018/02/23 | first author:Voelkl B				Original research		1	Methodology/ Life sciences: Experimental heterogenisation
Artificial intelligence faces reproducibility crisis.	/pubmed/29449469	Hutson M.	Science. 2018 Feb 16;359(6377):725-726. doi: 10.1126/science.359.6377.725. No abstract available.	Science. 2018	PubMed	citation	PMID:29449469	pubmed	29449469	create date:2018/02/17 | first author:Hutson M				News		1	Methodology/ Transparency/ Data availability
Modelling science trustworthiness under publish or perish pressure.	/pubmed/29410855	Grimes DR, Bauch CT, Ioannidis JPA.	R Soc Open Sci. 2018 Jan 10;5(1):171511. doi: 10.1098/rsos.171511. eCollection 2018 Jan.	R Soc Open Sci. 2018	PubMed	citation	PMID:29410855 | PMCID:PMC5792932	pubmed	29410855	create date:2018/02/08 | first author:Grimes DR				Original research		1	Modelling study
Building capacity to encourage research reproducibility and #MakeResearchTrue.	/pubmed/29339941	Rethlefsen ML, Lackey MJ, Zhao S.	J Med Libr Assoc. 2018 Jan;106(1):113-119. doi: 10.5195/jmla.2018.273. Epub 2018 Jan 2.	J Med Libr Assoc. 2018	PubMed	citation	PMID:29339941 | PMCID:PMC5764576	pubmed	29339941	create date:2018/01/18 | first author:Rethlefsen ML				Case study		1	Awareness initiative
Genotypic variability enhances the reproducibility of an ecological study.	/pubmed/29335575	Milcu A, Puga-Freitas R, Ellison AM, Blouin M, Scheu S, Freschet GT, Rose L, Barot S, Cesarz S, Eisenhauer N, Girin T, Assandri D, Bonkowski M, Buchmann N, Butenschoen O, Devidal S, Gleixner G, Gessler A, Gigon A, Greiner A, Grignani C, Hansart A, et al.	Nat Ecol Evol. 2018 Feb;2(2):279-287. doi: 10.1038/s41559-017-0434-x. Epub 2018 Jan 15.	Nat Ecol Evol. 2018	PubMed	citation	PMID:29335575	pubmed	29335575	create date:2018/01/18 | first author:Milcu A				Original research		1	Methodology/ Ecology: Experimental heterogenisation
Replication Study: Transcriptional amplification in tumor cells with elevated c-Myc.	/pubmed/29313490	Lewis LM, Edwards MC, Meyers ZR, Talbot CC, Hao H, Blum D; Reproducibility Project: Cancer Biology., Iorns E, Tsui R, Denis A, Perfito N, Errington TM.	Elife. 2018 Jan 9;7. pii: e30274. doi: 10.7554/eLife.30274.	Elife. 2018	PubMed	citation	PMID:29313490 | PMCID:PMC5760205	pubmed	29313490	create date:2018/01/10 | first author:Lewis LM				Confirmation study		1	Reproducibility Project: Cancer Biology Replication Study: Results could not be interpreted.
Replication Study: Systematic identification of genomic markers of drug sensitivity in cancer cells.	/pubmed/29313488	Vanden Heuvel JP, Maddox E, Maalouf SW; Reproducibility Project: Cancer Biology., Iorns E, Tsui R, Denis A, Perfito N, Errington TM.	Elife. 2018 Jan 9;7. pii: e29747. doi: 10.7554/eLife.29747.	Elife. 2018	PubMed	citation	PMID:29313488 | PMCID:PMC5760202	pubmed	29313488	create date:2018/01/10 | first author:Vanden Heuvel JP				Confirmation study		1	Reproducibility Project: Cancer Biology Replication Study: Results could not be interpreted.
Systematic heterogenization for better reproducibility in animal experimentation.	/pubmed/29296016	Richter SH.	Lab Anim (NY). 2017 Aug 31;46(9):343-349. doi: 10.1038/laban.1330.	Lab Anim (NY). 2017	PubMed	citation	PMID:29296016	pubmed	29296016	create date:2018/01/04 | first author:Richter SH				Review		1	Methodology/ Life sciences: Experimental heterogenisation
How often should we expect to be wrong? Statistical power, P values, and the expected prevalence of false discoveries.	/pubmed/29248599	Marino MJ.	Biochem Pharmacol. 2017 Dec 14. pii: S0006-2952(17)30723-2. doi: 10.1016/j.bcp.2017.12.011. [Epub ahead of print] Review.	Biochem Pharmacol. 2017	PubMed	citation	PMID:29248599	pubmed	29248599	create date:2017/12/19 | first author:Marino MJ				Original research		1	Methodology/ Life sciences: Statistics
Five ways to fix statistics.	/pubmed/29189798	Leek J, McShane BB, Gelman A, Colquhoun D, Nuijten MB, Goodman SN.	Nature. 2017 Nov 30;551(7682):557-559. doi: 10.1038/d41586-017-07522-z. No abstract available.	Nature. 2017	PubMed	citation	PMID:29189798	pubmed	29189798	create date:2017/12/01 | first author:Leek J				Comment		1	Methodology/ Sciences: Use of statistical methods
Lacking quality in research: Is behavioral neuroscience affected more than other areas of biomedical science?	/pubmed/29107620	Bespalov A, Steckler T.	J Neurosci Methods. 2017 Oct 28. pii: S0165-0270(17)30374-6. doi: 10.1016/j.jneumeth.2017.10.018. [Epub ahead of print]	J Neurosci Methods. 2017	PubMed	citation	PMID:29107620	pubmed	29107620	create date:2017/11/07 | first author:Bespalov A				Review		1	Methodology/ Life Sciences
The Imperative Authentication of Cell Lines.	/pubmed/29066454	Rojas A.	Antimicrob Agents Chemother. 2017 Oct 24;61(11). pii: e01823-17. doi: 10.1128/AAC.01823-17. Print 2017 Nov. No abstract available.	Antimicrob Agents Chemother. 2017	PubMed	citation	PMID:29066454 | PMCID:PMC5655083	pubmed	29066454	create date:2017/10/27 | first author:Rojas A				Letter		1	Methodology/ Life sciences: Comments that Hep-2 is a cross-contaminant of the cervix adenocarcinoma HeLa cell line
The 22Rv1 prostate cancer cell line carries mixed genetic ancestry: Implications for prostate cancer health disparities research using pre-clinical models.	/pubmed/29030865	Woods-Burnham L, Basu A, Cajigas-Du Ross CK, Love A, Yates C, De Leon M, Roy S, Casiano CA.	Prostate. 2017 Dec;77(16):1601-1608. doi: 10.1002/pros.23437. Epub 2017 Oct 14.	Prostate. 2017	PubMed	citation	PMID:29030865	pubmed	29030865	create date:2017/10/17 | first author:Woods-Burnham L				Not relevant
Relationship between viremia and specific organ damage in Ebola patients: a cohort study.	/pubmed/29020340	Lanini S, Portella G, Vairo F, Kobinger GP, Pesenti A, Langer M, Kabia S, Brogiato G, Amone J, Castilletti C, Miccio R, Capobianchi MR, Strada G, Zumla A, Di Caro A, Ippolito G; INMI-EMERGENCY EBOV Sierra Leone Study group..	Clin Infect Dis. 2017 Aug 20. doi: 10.1093/cid/cix704. [Epub ahead of print]	Clin Infect Dis. 2017	PubMed	citation	PMID:29020340	pubmed	29020340	create date:2017/10/12 | first author:Lanini S				Not relevant
Alternative Lengthening of Telomeres: DNA Repair Pathways Converge.	/pubmed/28969871	Sobinoff AP, Pickett HA.	Trends Genet. 2017 Sep 29. pii: S0168-9525(17)30162-2. doi: 10.1016/j.tig.2017.09.003. [Epub ahead of print] Review.	Trends Genet. 2017	PubMed	citation	PMID:28969871	pubmed	28969871	create date:2017/10/04 | first author:Sobinoff AP				Not relevant
Steps towards transparency in research publishing.	/pubmed/28959991	[No authors listed]	Nature. 2017 Sep 26;549(7673):431. doi: 10.1038/549431a. No abstract available.	Nature. 2017	PubMed	citation	PMID:28959991	pubmed	28959991	create date:2017/09/30				Editorial		1	Methodology: Transparency/ raw data requirements for publishing/ peer review process
Authentication of M14 melanoma cell line proves misidentification of MDA-MB-435 breast cancer cell line.	/pubmed/28940260	Korch C, Hall EM, Dirks WG, Ewing M, Faries M, Varella-Garcia M, Robinson S, Storts D, Turner JA, Wang Y, Burnett EC, Healy L, Kniss D, Neve RM, Nims RW, Reid YA, Robinson WA, Capes-Davis A.	Int J Cancer. 2017 Sep 22. doi: 10.1002/ijc.31067. [Epub ahead of print]	Int J Cancer. 2017	PubMed	citation	PMID:28940260	pubmed	28940260	create date:2017/09/25 | first author:Korch C				Original research		1	Methodology/ Life sciences: Demonstrates that M14 and MDA-MB-435 are melanoma cell lines of the same origin and that M14 is the original cell line
Ethical and Legal Implications of the Methodological Crisis in Neuroimaging.	/pubmed/28937337	Kellmeyer P.	Camb Q Healthc Ethics. 2017 Oct;26(4):530-554. doi: 10.1017/S096318011700007X.	Camb Q Healthc Ethics. 2017	PubMed	citation	PMID:28937337	pubmed	28937337	create date:2017/09/25 | first author:Kellmeyer P				Review		1	Methodology/ Neurosciences: Neuroimaging
Caring about Power Analyses.	/pubmed/28933527	Murray JE, Barrett ST, Brock RL, Bevins RA.	ACS Chem Neurosci. 2017 Sep 21. doi: 10.1021/acschemneuro.7b00341. [Epub ahead of print]	ACS Chem Neurosci. 2017	PubMed	citation	PMID:28933527	pubmed	28933527	create date:2017/09/22 | first author:Murray JE				Opinion		1	Methodology/ Life sciences: Data analysis and statistical methods
[Statistics at the time of the crisis].	/pubmed/28929711	Saltelli A, Stark PB.	Epidemiol Prev. 2017 May-Aug;41(3-4):165-169. doi: 10.19191/EP17.3-4.P165.048. Italian.	Epidemiol Prev. 2017	PubMed	citation	PMID:28929711	pubmed	28929711	create date:2017/09/21 | first author:Saltelli A				Italian
Revisiting inconsistency in large pharmacogenomic studies.	/pubmed/28928933	Safikhani Z, Smirnov P, Freeman M, El-Hachem N, She A, Rene Q, Goldenberg A, Birkbak NJ, Hatzis C, Shi L, Beck AH, Aerts HJWL, Quackenbush J, Haibe-Kains B.	Version 3. F1000Res. 2016 Sep 16 [revised 2017 Jan 1];5:2333. doi: 10.12688/f1000research.9611.3. eCollection 2016.	F1000Res. 2016	PubMed	citation	PMID:28928933 | PMCID:PMC5580432	pubmed	28928933	create date:2017/09/25 | first author:Safikhani Z				Original research		1	Methodology/ Life sciences: Discrepancies between large pharmacogenomic screens
The Failure of Null Hypothesis Significance Testing When Studying Incremental Changes, and What to Do About It.	/pubmed/28914154	Gelman A.	Pers Soc Psychol Bull. 2017 Sep 1:146167217729162. doi: 10.1177/0146167217729162. [Epub ahead of print]	Pers Soc Psychol Bull. 2017	PubMed	citation	PMID:28914154	pubmed	28914154	create date:2017/09/16 | first author:Gelman A				Opinion		1	Methodology/ Psychology: Statistical methods
Reliability of EEG Measures of Interaction: A Paradigm Shift Is Needed to Fight the Reproducibility Crisis.	/pubmed/28912704	HÌ¦ller Y, Uhl A, Bathke A, Thomschewski A, Butz K, Nardone R, Fell J, Trinka E.	Front Hum Neurosci. 2017 Aug 30;11:441. doi: 10.3389/fnhum.2017.00441. eCollection 2017.	Front Hum Neurosci. 2017	PubMed	citation	PMID:28912704 | PMCID:PMC5582168	pubmed	28912704	create date:2017/09/16 | first author:HÌ¦ller Y				Original research		1	Methodology/ Neurosciences: EEG measures
The science reproducibility crisis and the necessity to publish negative results.	/pubmed/28890235	GonzÌÁlez MartÌ_n-Moro J.	Arch Soc Esp Oftalmol. 2017 Sep 7. pii: S0365-6691(17)30253-8. doi: 10.1016/j.oftal.2017.07.009. [Epub ahead of print] English, Spanish. No abstract available.	Arch Soc Esp Oftalmol. 2017	PubMed	citation	PMID:28890235	pubmed	28890235	create date:2017/09/12 | first author:GonzÌÁlez MartÌ_n-Moro J				Spanish
Moving Forward: Challenges and Directions for Psychopathological Network Theory and Methodology.	/pubmed/28873325	Fried EI, Cramer AOJ.	Perspect Psychol Sci. 2017 Aug 1:1745691617705892. doi: 10.1177/1745691617705892. [Epub ahead of print]	Perspect Psychol Sci. 2017	PubMed	citation	PMID:28873325	pubmed	28873325	create date:2017/09/06 | first author:Fried EI				Review		1	Methodology: Psychopathological Network Theory
A long journey to reproducible results.	/pubmed/28836615	Lithgow GJ, Driscoll M, Phillips P.	Nature. 2017 Aug 22;548(7668):387-388. doi: 10.1038/548387a. No abstract available.	Nature. 2017	PubMed	citation	PMID:28836615	pubmed	28836615	create date:2017/08/25 | first author:Lithgow GJ				Comment		1	Methodology/ Life sciences: Describes the difficulties to achieve reproducible results
Why statistical inference from clinical trials is likely to generate false and irreproducible results.	/pubmed/28830371	Hanin L.	BMC Med Res Methodol. 2017 Aug 22;17(1):127. doi: 10.1186/s12874-017-0399-0.	BMC Med Res Methodol. 2017	PubMed	citation	PMID:28830371 | PMCID:PMC5568363	pubmed	28830371	create date:2017/08/24 | first author:Hanin L				Review		1	Methodology/ Clinical trials: Statistics
When Null Hypothesis Significance Testing Is Unsuitable for Research: A Reassessment.	/pubmed/28824397	Szucs D, Ioannidis JPA.	Front Hum Neurosci. 2017 Aug 3;11:390. doi: 10.3389/fnhum.2017.00390. eCollection 2017. Review.	Front Hum Neurosci. 2017	PubMed	citation	PMID:28824397 | PMCID:PMC5540883	pubmed	28824397	create date:2017/08/22 | first author:Szucs D				Review		1	Methodology/ Clinical trials: Neuroscience, Psychology, Biomedical science in general
Investigation of cross-contamination among human cell lines used in China.	/pubmed/28795393	Wang M, Yang M, Liu Y, Huang Y, Ye F, Zheng C, Shen C.	Int J Cancer. 2017 Aug 10. doi: 10.1002/ijc.30923. [Epub ahead of print]	Int J Cancer. 2017	PubMed	citation	PMID:28795393	pubmed	28795393	create date:2017/08/11 | first author:Wang M				Original research		1	Methodology/ Life sciences: Reports on almost 50% of misidentification in cell lines in China
The reproducibility "crisis": Reaction to replication crisis should not stifle innovation.	/pubmed/28794201	Hunter P.	EMBO Rep. 2017 Sep;18(9):1493-1496. doi: 10.15252/embr.201744876. Epub 2017 Aug 9. No abstract available.	EMBO Rep. 2017	PubMed	citation	PMID:28794201 | PMCID:PMC5579390	pubmed	28794201	create date:2017/08/11 | first author:Hunter P				Perspective		1	Methodology/ Life sciences
Targeted Genome Sequencing Reveals Varicella-Zoster Virus Open Reading Frame 12 Deletion.	/pubmed/28747504	Cohrs RJ, Lee KS, Beach A, Sanford B, Baird NL, Como C, Graybill C, Jones D, Tekeste E, Ballard M, Chen X, Yalacki D, Frietze S, Jones K, Lenac Rovis T, JonjiÄ‡ S, Haas J, Gilden D.	J Virol. 2017 Sep 27;91(20). pii: e01141-17. doi: 10.1128/JVI.01141-17. Print 2017 Oct 15.	J Virol. 2017	PubMed	citation	PMID:28747504 | PMCID:PMC5625521	pubmed	28747504	create date:2017/07/28 | first author:Cohrs RJ				Not relevant
Participant NonnaivetÌ© and the reproducibility of cognitive psychology.	/pubmed/28744765	Zwaan RA, Pecher D, Paolacci G, Bouwmeester S, Verkoeijen P, Dijkstra K, Zeelenberg R.	Psychon Bull Rev. 2017 Jul 25. doi: 10.3758/s13423-017-1348-y. [Epub ahead of print]	Psychon Bull Rev. 2017	PubMed	citation	PMID:28744765	pubmed	28744765	create date:2017/07/27 | first author:Zwaan RA				Confirmation study		1	Psychology: Successful reproduction of studies
Sepsis reconsidered: Identifying novel metrics for behavioral landscape characterization with a high-performance computing implementation of an agent-based model.	/pubmed/28728997	Cockrell C, An G.	J Theor Biol. 2017 Oct 7;430:157-168. doi: 10.1016/j.jtbi.2017.07.016. Epub 2017 Jul 18.	J Theor Biol. 2017	PubMed	citation	PMID:28728997 | PMCID:PMC5635265	pubmed	28728997	create date:2017/07/22 | first author:Cockrell C				Not relevant
Going in Many Right Directions, All at Once.	/pubmed/28727963	Fiske ST.	Perspect Psychol Sci. 2017 Jul;12(4):652-655. doi: 10.1177/1745691617706506.	Perspect Psychol Sci. 2017	PubMed	citation	PMID:28727963 | PMCID:PMC5520646	pubmed	28727963	create date:2017/07/21 | first author:Fiske ST				Review		1	Methodology/ Psychology
Psychology's Replication Crisis and the Grant Culture: Righting the Ship.	/pubmed/28727961	Lilienfeld SO.	Perspect Psychol Sci. 2017 Jul;12(4):660-664. doi: 10.1177/1745691616687745.	Perspect Psychol Sci. 2017	PubMed	citation	PMID:28727961	pubmed	28727961	create date:2017/07/21 | first author:Lilienfeld SO				Review		1	Incentives/ Psychology: Grant culture
The ABCs of finding a good antibody: How to find a good antibody, validate it, and publish meaningful data.	/pubmed/28713558	Acharya P, Quinlan A, Neumeister V.	F1000Res. 2017 Jun 8;6:851. doi: 10.12688/f1000research.11774.1. eCollection 2017.	F1000Res. 2017	PubMed	citation	PMID:28713558 | PMCID:PMC5499787	pubmed	28713558	create date:2017/07/18 | first author:Acharya P				Opinion		1	Methodology/ Life sciences: Antibody quality
Investigating reproducibility and tracking provenance - A genomic workflow case study.	/pubmed/28701218	Kanwal S, Khan FZ, Lonie A, Sinnott RO.	BMC Bioinformatics. 2017 Jul 12;18(1):337. doi: 10.1186/s12859-017-1747-0.	BMC Bioinformatics. 2017	PubMed	citation	PMID:28701218 | PMCID:PMC5508699	pubmed	28701218	create date:2017/07/14 | first author:Kanwal S				Original research		1	Methodology/ Bioinformatics: Analysis of genomics data
The earth is flat (påÊ>åÊ0.05): significance thresholds and the crisis of unreplicable research.	/pubmed/28698825	Amrhein V, Korner-Nievergelt F, Roth T.	PeerJ. 2017 Jul 7;5:e3544. doi: 10.7717/peerj.3544. eCollection 2017.	PeerJ. 2017	PubMed	citation	PMID:28698825 | PMCID:PMC5502092	pubmed	28698825	create date:2017/07/13 | first author:Amrhein V				Review		1	Methodology: Less strict p-values
Commentary: Reproducibility in Psychological Science: When Do Psychological Phenomena Exist?	/pubmed/28690559	Heino MTJ, Fried EI, LeBel EP.	Front Psychol. 2017 Jun 22;8:1004. doi: 10.3389/fpsyg.2017.01004. eCollection 2017. No abstract available.	Front Psychol. 2017	PubMed	citation	PMID:28690559 | PMCID:PMC5479906	pubmed	28690559	create date:2017/07/12 | first author:Heino MTJ				Opinion		1	Methodology/ Psychology
Errors in data interpretation from genetic variation of human analytes.	/pubmed/28679954	Howie HL, Delaney M, Wang X, Er LS, Kapp L, Lebedev JN, Zimring JC.	JCI Insight. 2017 Jul 6;2(13). pii: 94532. doi: 10.1172/jci.insight.94532. [Epub ahead of print]	JCI Insight. 2017	PubMed	citation	PMID:28679954 | PMCID:PMC5499359	pubmed	28679954	create date:2017/07/07 | first author:Howie HL				Original research		1	Methodology/ Life sciences: Use of antibodies
Validity evidence of non-technical skills assessment instruments in simulated anaesthesia crisis management.	/pubmed/28673217	Jirativanont T, Raksamani K, Aroonpruksakul N, Apidechakul P, Suraseranivongse S.	Anaesth Intensive Care. 2017 Jul;45(4):469-475.	Anaesth Intensive Care. 2017	PubMed	citation	PMID:28673217	pubmed	28673217	create date:2017/07/05 | first author:Jirativanont T				Not relevant
Simulation-based Assessment of the Management of Critical Events by Board-certified Anesthesiologists.	/pubmed/28671903	Weinger MB, Banerjee A, Burden AR, McIvor WR, Boulet J, Cooper JB, Steadman R, Shotwell MS, Slagle JM, DeMaria S Jr, Torsher L, Sinz E, Levine AI, Rask J, Davis F, Park C, Gaba DM.	Anesthesiology. 2017 Sep;127(3):475-489. doi: 10.1097/ALN.0000000000001739.	Anesthesiology. 2017	PubMed	citation	PMID:28671903	pubmed	28671903	create date:2017/07/04 | first author:Weinger MB				Not relevant
Replication Study: The common feature of leukemia-associated IDH1 and IDH2 mutations is a neomorphic enzyme activity converting alpha-ketoglutarate to 2-hydroxyglutarate.	/pubmed/28653623	Showalter MR, Hatakeyama J, Cajka T, VanderVorst K, Carraway KL, Fiehn O; Reproducibility Project: Cancer Biology..	Elife. 2017 Jun 27;6. pii: e26030. doi: 10.7554/eLife.26030.	Elife. 2017	PubMed	citation	PMID:28653623 | PMCID:PMC5487214	pubmed	28653623	create date:2017/06/28 | first author:Showalter MR				Confirmation study		1	Reproducibility Project: Cancer Biology: Important parts of the original paper were reproduced.
Replication Study: Inhibition of BET recruitment to chromatin as an effective treatment for MLL-fusion leukaemia.	/pubmed/28653617	Shan X, Fung JJ, Kosaka A, Danet-Desnoyers G; Reproducibility Project: Cancer Biology..	Elife. 2017 Jun 27;6. pii: e25306. doi: 10.7554/eLife.25306.	Elife. 2017	PubMed	citation	PMID:28653617 | PMCID:PMC5487217	pubmed	28653617	create date:2017/06/28 | first author:Shan X				Confirmation study		1	Reproducibility Project: Cancer Biology: Important parts of the original paper were reproduced.
The replacement of assertive outreach services by reinforcing local community teams: a replication study reporting comparative outcomes and patient reported experience.	/pubmed/28648100	Firn M, Alonso-Vicente M, Hubbeling D, Holley J, White SJ, Jones B.	J Ment Health. 2017 Jun 24:1-7. doi: 10.1080/09638237.2017.1340601. [Epub ahead of print]	J Ment Health. 2017	PubMed	citation	PMID:28648100	pubmed	28648100	create date:2017/06/27 | first author:Firn M				Confirmation study		1	Public Health: successful
Confidence crisis of results in biomechanics research.	/pubmed/28632059	Knudson D.	Sports Biomech. 2017 Nov;16(4):425-433. doi: 10.1080/14763141.2016.1246603. Epub 2017 Feb 28.	Sports Biomech. 2017	PubMed	citation	PMID:28632059	pubmed	28632059	create date:2017/06/21 | first author:Knudson D				Review		1	Methodology/ Sports sciences: biomechanics
Reproducibility2020: Progress and priorities.	/pubmed/28620458	Freedman LP, Venugopalan G, Wisman R.	F1000Res. 2017 May 2;6:604. doi: 10.12688/f1000research.11334.1. eCollection 2017. Review.	F1000Res. 2017	PubMed	citation	PMID:28620458 | PMCID:PMC5461896	pubmed	28620458	create date:2017/06/18 | first author:Freedman LP				Review		1	Methodology/ Preclinical research
Translational pain assessment: could natural animal models be the missing link?	/pubmed/28614187	Klinck MP, Mogil JS, Moreau M, Lascelles BDX, Flecknell PA, Poitte T, Troncy E.	Pain. 2017 Sep;158(9):1633-1646. doi: 10.1097/j.pain.0000000000000978.	Pain. 2017	PubMed	citation	PMID:28614187	pubmed	28614187	create date:2017/06/15 | first author:Klinck MP				Review		1	Methodology/ Life sciences: Animal models for pain research
Big Data, Small Sample.	/pubmed/28599385	Gerlovina I, van der Laan MJ, Hubbard A.	Int J Biostat. 2017 May 20;13(1). pii: /j/ijb.2017.13.issue-1/ijb-2017-0012/ijb-2017-0012.xml. doi: 10.1515/ijb-2017-0012.	Int J Biostat. 2017	PubMed	citation	PMID:28599385	pubmed	28599385	create date:2017/06/11 | first author:Gerlovina I				Original research		1	Methodology: Analysis of big data
ERK1/2 signaling mediated naringin-induced osteogenic differentiation of immortalized human periodontal ligament stem cells.	/pubmed/28554841	Wei K, Xie Y, Chen T, Fu B, Cui S, Wang Y, Cai G, Chen X.	Biochem Biophys Res Commun. 2017 Jul 29;489(3):319-325. doi: 10.1016/j.bbrc.2017.05.130. Epub 2017 May 26.	Biochem Biophys Res Commun. 2017	PubMed	citation	PMID:28554841	pubmed	28554841	create date:2017/05/31 | first author:Wei K				Not relevant
Publish houses of brick, not mansions of straw.	/pubmed/28541345	Kaelin WG Jr.	Nature. 2017 May 23;545(7655):387. doi: 10.1038/545387a. No abstract available.	Nature. 2017	PubMed	citation	PMID:28541345	pubmed	28541345	create date:2017/05/26 | first author:Kaelin WG Jr				Opinion		1	Incentives: Prerequisites for publications in high impact journals/ pressure to publish in high impact journals
Common pitfalls in preclinical cancer target validation.	/pubmed/28524181	Kaelin WG Jr.	Nat Rev Cancer. 2017 Jul;17(7):425-440. doi: 10.1038/nrc.2017.32. Epub 2017 May 19.	Nat Rev Cancer. 2017	PubMed	citation	PMID:28524181	pubmed	28524181	create date:2017/05/20 | first author:Kaelin WG Jr				Opinion		1	Methodology/ Incentives/ Preclinical target validation
Sexual orientation differences in treatment expectation, alliance, and outcome among patients at risk for suicide in a public psychiatric hospital.	/pubmed/28506219	PlÌ¦derl M, Kunrath S, Cramer RJ, Wang J, Hauer L, Fartacek C.	BMC Psychiatry. 2017 May 15;17(1):184. doi: 10.1186/s12888-017-1337-8.	BMC Psychiatry. 2017	PubMed	citation	PMID:28506219 | PMCID:PMC5433065	pubmed	28506219	create date:2017/05/17 | first author:PlÌ¦derl M				Not relevant
A critical evaluation of the current "p-value controversy".	/pubmed/28504870	Wellek S.	Biom J. 2017 Sep;59(5):854-872. doi: 10.1002/bimj.201700001. Epub 2017 May 15. Review.	Biom J. 2017	PubMed	citation	PMID:28504870	pubmed	28504870	create date:2017/05/16 | first author:Wellek S				Review		1	Methodology: Use of p-values in medical research
Matched preclinical designs for improved translatability.	/pubmed/28490671	Aittokallio T, Scherer A, Poutanen M, Freedman LP.	Sci Transl Med. 2017 May 10;9(389). pii: eaal4101. doi: 10.1126/scitranslmed.aal4101.	Sci Transl Med. 2017	PubMed	citation	PMID:28490671	pubmed	28490671	create date:2017/05/12 | first author:Aittokallio T				Editorial		1	Methodology/ Life sciences: Animal models/ experiments
Challenging Authority During an Emergency-the Effect of a Teaching Intervention.	/pubmed/28471813	Friedman Z, Perelman V, McLuckie D, Andrews M, Noble LMK, Malavade A, Bould MD.	Crit Care Med. 2017 Aug;45(8):e814-e820. doi: 10.1097/CCM.0000000000002450.	Crit Care Med. 2017	PubMed	citation	PMID:28471813	pubmed	28471813	create date:2017/05/05 | first author:Friedman Z				Not relevant
Defending Biomedical Science in an Era of Threatened Funding.	/pubmed/28459974	Ioannidis JPA.	JAMA. 2017 Jun 27;317(24):2483-2484. doi: 10.1001/jama.2017.5811. No abstract available.	JAMA. 2017	PubMed	citation	PMID:28459974	pubmed	28459974	create date:2017/05/02 | first author:Ioannidis JPA				Opinion		1	Incentives/ Preclinical research: Funding
Challenges to Ego-Depletion Research Go beyond the Replication Crisis: A Need for Tackling the Conceptual Crisis.	/pubmed/28458647	Lurquin JH, Miyake A.	Front Psychol. 2017 Apr 18;8:568. doi: 10.3389/fpsyg.2017.00568. eCollection 2017. No abstract available.	Front Psychol. 2017	PubMed	citation	PMID:28458647 | PMCID:PMC5394171	pubmed	28458647	create date:2017/05/02 | first author:Lurquin JH				Review		1	Methodology/ Psychology
Widespread Use of Misidentified Cell Line KB (HeLa): Incorrect Attribution and Its Impact Revealed through Mining the Scientific Literature.	/pubmed/28455420	Vaughan L, GlÃ¤nzel W, Korch C, Capes-Davis A.	Cancer Res. 2017 Jun 1;77(11):2784-2788. doi: 10.1158/0008-5472.CAN-16-2258. Epub 2017 Apr 28.	Cancer Res. 2017	PubMed	citation	PMID:28455420	pubmed	28455420	create date:2017/04/30 | first author:Vaughan L				Original research		1	Methodology/ Life sciences: misidentified cell lines
Addressing reproducibility in single-laboratory phenotyping experiments.	/pubmed/28448068	Kafkafi N, Golani I, Jaljuli I, Morgan H, Sarig T, W√ºrbel H, Yaacoby S, Benjamini Y.	Nat Methods. 2017 Apr 27;14(5):462-464. doi: 10.1038/nmeth.4259. No abstract available.	Nat Methods. 2017	PubMed	citation	PMID:28448068	pubmed	28448068	create date:2017/04/28 | first author:Kafkafi N				Comment		1	Methodology/ Life sciences: Experimental heterogenisation
The credibility crisis in research: Can economics tools help?	/pubmed/28445470	Gall T, Ioannidis JPA, Maniadis Z.	PLoS Biol. 2017 Apr 26;15(4):e2001846. doi: 10.1371/journal.pbio.2001846. eCollection 2017 Apr. Review.	PLoS Biol. 2017	PubMed	citation	PMID:28445470 | PMCID:PMC5405914	pubmed	28445470	create date:2017/04/27 | first author:Gall T				Perspective		1	Suggests reforms: Discusses the use of economic tools to tackle the reproducibility crisis in the life sciences
The need for a worldwide consensus for cell line authentication: Experience implementing a mandatory requirement at the International Journal of Cancer.	/pubmed/28414712	Fusenig NE, Capes-Davis A, Bianchini F, Sundell S, Lichter P.	PLoS Biol. 2017 Apr 17;15(4):e2001438. doi: 10.1371/journal.pbio.2001438. eCollection 2017 Apr.	PLoS Biol. 2017	PubMed	citation	PMID:28414712 | PMCID:PMC5393552	pubmed	28414712	create date:2017/04/18 | first author:Fusenig NE				Perspective		1	Methodology/ Life sciences: misidentified cell lines
Bayesian data analysis for newcomers.	/pubmed/28405907	Kruschke JK, Liddell TM.	Psychon Bull Rev. 2017 Apr 12. doi: 10.3758/s13423-017-1272-1. [Epub ahead of print]	Psychon Bull Rev. 2017	PubMed	citation	PMID:28405907	pubmed	28405907	create date:2017/04/14 | first author:Kruschke JK				Not relevant
The (non-)replicability of regulatory resource depletion: A field report employing non-invasive brain stimulation.	/pubmed/28362843	Emmerling F, Martijn C, Alberts HJ, Thomson AC, David B, Kessler D, Schuhmann T, Sack AT.	PLoS One. 2017 Mar 31;12(3):e0174331. doi: 10.1371/journal.pone.0174331. eCollection 2017.	PLoS One. 2017	PubMed	citation	PMID:28362843 | PMCID:PMC5376079	pubmed	28362843	create date:2017/04/01 | first author:Emmerling F				Confirmation study		1	Psychology: unsuccessful
STR Profiling of HTLV-1-Infected Cell Lines.	/pubmed/28357668	Raimondi V, Minuzzo S, Ciminale V, D'Agostino DM.	Methods Mol Biol. 2017;1582:143-154. doi: 10.1007/978-1-4939-6872-5_11.	Methods Mol Biol. 2017	PubMed	citation	PMID:28357668	pubmed	28357668	create date:2017/03/31 | first author:Raimondi V				Original research		1	Methodology/ Life sciences: Cell line authentication
The challenges with the validation of research antibodies.	/pubmed/28357047	Voskuil JL.	F1000Res. 2017 Feb 17;6:161. doi: 10.12688/f1000research.10851.1. eCollection 2017.	F1000Res. 2017	PubMed	citation	PMID:28357047 | PMCID:PMC5333605	pubmed	28357047	create date:2017/03/31 | first author:Voskuil JL				Opinion		1	Methodology/ Life sciences: Use of antibodies
Introducing Therioepistemology: the study of how knowledge is gained from animal research.	/pubmed/28328885	Garner JP, Gaskill BN, Weber EM, Ahloy-Dallaire J, Pritchett-Corning KR.	Lab Anim (NY). 2017 Mar 22;46(4):103-113. doi: 10.1038/laban.1224. Review.	Lab Anim (NY). 2017	PubMed	citation	PMID:28328885	pubmed	28328885	create date:2017/03/23 | first author:Garner JP				Review		1	Methodology/ Life sciences: Animal research
A patient called Medical Research.	/pubmed/28323292	Furst T, Strojil J.	Biomed Pap Med Fac Univ Palacky Olomouc Czech Repub. 2017 Mar;161(1):54-57. doi: 10.5507/bp.2017.005. Epub 2017 Mar 14. Review.	Biomed Pap Med Fac Univ Palacky Olomouc Czech Repub. 2017	PubMed	citation	PMID:28323292	pubmed	28323292	create date:2017/03/23 | first author:Furst T				Opinion		1	Incentives/ Methodology/ Medical research: Incentives and statistical methods
Meta-assessment of bias in science.	/pubmed/28320937	Fanelli D, Costas R, Ioannidis JP.	Proc Natl Acad Sci U S A. 2017 Apr 4;114(14):3714-3719. doi: 10.1073/pnas.1618569114. Epub 2017 Mar 20.	Proc Natl Acad Sci U S A. 2017	PubMed	citation	PMID:28320937 | PMCID:PMC5389310	pubmed	28320937	create date:2017/03/23 | first author:Fanelli D				Original research		1	Methodology/ Bias
Allen Newell's Program of Research: The Video-Game Test.	/pubmed/28318146	Gobet F.	Top Cogn Sci. 2017 Apr;9(2):522-532. doi: 10.1111/tops.12265. Epub 2017 Mar 20.	Top Cogn Sci. 2017	PubMed	citation	PMID:28318146	pubmed	28318146	create date:2017/03/21 | first author:Gobet F				Not relevant
Establishing a reference dataset for the authentication of spinal muscular atrophy cell lines using STR profiling and digital PCR.	/pubmed/28284873	Stabley DL, Holbrook J, Harris AW, Swoboda KJ, Crawford TO, Sol-Church K, Butchbach MER.	Neuromuscul Disord. 2017 May;27(5):439-446. doi: 10.1016/j.nmd.2017.02.002. Epub 2017 Feb 6.	Neuromuscul Disord. 2017	PubMed	citation	PMID:28284873 | PMCID:PMC5403612	pubmed	28284873	create date:2017/03/13 | first author:Stabley DL				Original research		1	Methodology/ Life sciences: Cell line authentication
Addressing the "Replication Crisis": Using Original Studies to Design Replication Studies with Appropriate Statistical Power.	/pubmed/28266872	Anderson SF, Maxwell SE.	Multivariate Behav Res. 2017 May-Jun;52(3):305-324. doi: 10.1080/00273171.2017.1289361. Epub 2017 Mar 7.	Multivariate Behav Res. 2017	PubMed	citation	PMID:28266872	pubmed	28266872	create date:2017/03/08 | first author:Anderson SF				Original research		1	Methodology/ Psychology
Cell lines authentication and mycoplasma detection as minimun quality control of cell lines in biobanking.	/pubmed/28255773	Corral-VÃ¡zquez C, Aguilar-Quesada R, Catalina P, Lucena-Aguilar G, Ligero G, Miranda B, Carrillo-Ãvila JA.	Cell Tissue Bank. 2017 Jun;18(2):271-280. doi: 10.1007/s10561-017-9617-6. Epub 2017 Mar 2.	Cell Tissue Bank. 2017	PubMed	citation	PMID:28255773 | PMCID:PMC5429902	pubmed	28255773	create date:2017/03/04 | first author:Corral-VÃ¡zquez C				Original research		1	Methodology/ Life sciences: Cell line authentication
Omics"-Informed Drug and Biomarker Discovery: Opportunities, Challenges and Future Perspectives.	/pubmed/28248238	Matthews H, Hanison J, Nirmalan N.	Proteomes. 2016 Sep 12;4(3). pii: E28. doi: 10.3390/proteomes4030028. Review.	Proteomes. 2016	PubMed	citation	PMID:28248238 | PMCID:PMC5217350	pubmed	28248238	create date:2017/03/02 | first author:Matthews H				Not relevant
No publication without confirmation.	/pubmed/28230138	Mogil JS, Macleod MR.	Nature. 2017 Feb 22;542(7642):409-411. doi: 10.1038/542409a. No abstract available.	Nature. 2017	PubMed	citation	PMID:28230138	pubmed	28230138	create date:2017/02/24 | first author:Mogil JS				Comment		1	Methodology/ Animal studies: Study design and publishing
Female fecundity variation affects reproducibility of experiments on host plant preference and acceptance in a phytophagous insect.	/pubmed/28202813	SchÌ_pers A, PetrÌ©n H, Wheat CW, Wiklund C, Friberg M.	Proc Biol Sci. 2017 Feb 22;284(1849). pii: 20162643. doi: 10.1098/rspb.2016.2643.	Proc Biol Sci. 2017	PubMed	citation	PMID:28202813 | PMCID:PMC5326532	pubmed	28202813	create date:2017/02/17 | first author:SchÌ_pers A				Not relevant
The probability of probability and research truths.	/pubmed/28201852	Fatovich DM, Phillips M.	Emerg Med Australas. 2017 Apr;29(2):242-244. doi: 10.1111/1742-6723.12740. Epub 2017 Feb 15.	Emerg Med Australas. 2017	PubMed	citation	PMID:28201852	pubmed	28201852	create date:2017/02/16 | first author:Fatovich DM				Perspective		1	Methodology/ Medical research: Statistics
A novel RNA sequencing data analysis method for cell line authentication.	/pubmed/28192450	Fasterius E, Raso C, Kennedy S, Rauch N, Lundin P, Kolch W, UhlÃ©n M, Al-Khalili Szigyarto C.	PLoS One. 2017 Feb 13;12(2):e0171435. doi: 10.1371/journal.pone.0171435. eCollection 2017.	PLoS One. 2017	PubMed	citation	PMID:28192450 | PMCID:PMC5305277	pubmed	28192450	create date:2017/02/14 | first author:Fasterius E				Original research		1	Methodology/ Life sciences: Cell line authentication
Measurement error and the replication crisis.	/pubmed/28183939	Loken E, Gelman A.	Science. 2017 Feb 10;355(6325):584-585. doi: 10.1126/science.aal3618. No abstract available.	Science. 2017	PubMed	citation	PMID:28183939	pubmed	28183939	create date:2017/02/12 | first author:Loken E				Perspective		1	Methodology/ General: Statistical considerations
Are your results valid? Cellular authentication a need from the past, an emergency on the present.	/pubmed/28127703	Cosme B, Falagan-Lotsch P, Ribeiro M, NapoleÃ£o K, Granjeiro JM, Moura-Neto R.	In Vitro Cell Dev Biol Anim. 2017 May;53(5):430-434. doi: 10.1007/s11626-016-0124-z. Epub 2017 Jan 27.	In Vitro Cell Dev Biol Anim. 2017	PubMed	citation	PMID:28127703	pubmed	28127703	create date:2017/01/28 | first author:Cosme B				Original research		1	Methodology/ Life sciences: Cell line authentication
Identification of newly established Spodoptera littoralis cell lines by two DNA barcoding markers.	/pubmed/28127700	Ahmed I, Huebner H, Mamoori YI, Buchholz R.	In Vitro Cell Dev Biol Anim. 2017 Apr;53(4):288-292. doi: 10.1007/s11626-016-0118-x. Epub 2017 Jan 26.	In Vitro Cell Dev Biol Anim. 2017	PubMed	citation	PMID:28127700	pubmed	28127700	create date:2017/01/28 | first author:Ahmed I				Original research		1	Methodology/ Life sciences: Cell line authentication
Patent Law's Reproducibility Paradox.	/pubmed/28117563	Sherkow JS.	Duke Law J. 2017 Jan;66(4):845-911.	Duke Law J. 2017	PubMed	citation	PMID:28117563	pubmed	28117563	create date:2017/01/25 | first author:Sherkow JS				Not relevant
Cancer reproducibility project releases first results.	/pubmed/28102271	Baker M, Dolgin E.	Nature. 2017 Jan 18;541(7637):269-270. doi: 10.1038/541269a. No abstract available.	Nature. 2017	PubMed	citation	PMID:28102271	pubmed	28102271	create date:2017/01/20 | first author:Baker M				News		1	Describes the Reproducibility Project: Cancer Biology
Replication Study: BET bromodomain inhibition as a therapeutic strategy to target c-Myc.	/pubmed/28100400	Aird F, Kandela I, Mantis C; Reproducibility Project: Cancer Biology..	Elife. 2017 Jan 19;6. pii: e21253. doi: 10.7554/eLife.21253.	Elife. 2017	PubMed	citation	PMID:28100400 | PMCID:PMC5245966	pubmed	28100400	create date:2017/01/20 | first author:Aird F				Confirmation study		1	Reproducibility Project: Cancer Biology: Important parts of the original paper were reproduced.
Replication Study: Discovery and preclinical validation of drug indications using compendia of public gene expression data.	/pubmed/28100397	Kandela I, Aird F; Reproducibility Project: Cancer Biology..	Elife. 2017 Jan 19;6. pii: e17044. doi: 10.7554/eLife.17044.	Elife. 2017	PubMed	citation	PMID:28100397 | PMCID:PMC5245962	pubmed	28100397	create date:2017/01/20 | first author:Kandela I				Confirmation study		1	Reproducibility Project: Cancer Biology: Important parts of the original paper were reproduced.
Replication Study: Coadministration of a tumor-penetrating peptide enhances the efficacy of cancer drugs.	/pubmed/28100395	Mantis C, Kandela I, Aird F; Reproducibility Project: Cancer Biology..	Elife. 2017 Jan 19;6. pii: e17584. doi: 10.7554/eLife.17584.	Elife. 2017	PubMed	citation	PMID:28100395 | PMCID:PMC5245960	pubmed	28100395	create date:2017/01/20 | first author:Mantis C				Confirmation study		1	Reproducibility Project: Cancer Biology Replication Study: Results could not be reproduced.
Replication Study: Melanoma genome sequencing reveals frequent PREX2 mutations.	/pubmed/28100394	Horrigan SK, Courville P, Sampey D, Zhou F, Cai S; Reproducibility Project: Cancer Biology..	Elife. 2017 Jan 19;6. pii: e21634. doi: 10.7554/eLife.21634.	Elife. 2017	PubMed	citation	PMID:28100394 | PMCID:PMC5245968	pubmed	28100394	create date:2017/01/20 | first author:Horrigan SK				Confirmation study		1	Reproducibility Project: Cancer Biology Replication Study: Results could not be interpreted.
Replication Study: The CD47-signal regulatory protein alpha (SIRPa) interaction is a therapeutic target for human solid tumors.	/pubmed/28100392	Horrigan SK; Reproducibility Project: Cancer Biology..	Elife. 2017 Jan 19;6. pii: e18173. doi: 10.7554/eLife.18173.	Elife. 2017	PubMed	citation	PMID:28100392 | PMCID:PMC5245970	pubmed	28100392	create date:2017/01/20 | first author:Horrigan SK				Confirmation study		1	Reproducibility Project: Cancer Biology Replication Study: Results could not be interpreted.
Telomeres in cancer: tumour suppression and genome instability.	/pubmed/28096526	Maciejowski J, de Lange T.	Nat Rev Mol Cell Biol. 2017 Mar;18(3):175-186. doi: 10.1038/nrm.2016.171. Epub 2017 Jan 18. Review.	Nat Rev Mol Cell Biol. 2017	PubMed	citation	PMID:28096526 | PMCID:PMC5589191	pubmed	28096526	create date:2017/01/18 | first author:Maciejowski J				Not relevant
Unobtrusive and Wearable Systems for Automatic Dietary Monitoring.	/pubmed/28092510	Prioleau T, Moore Ii E, Ghovanloo M.	IEEE Trans Biomed Eng. 2017 Sep;64(9):2075-2089. doi: 10.1109/TBME.2016.2631246. Epub 2017 Jan 16. Review.	IEEE Trans Biomed Eng. 2017	PubMed	citation	PMID:28092510	pubmed	28092510	create date:2017/01/17 | first author:Prioleau T				Not relevant
Structure elucidation, DNA binding specificity and antiproliferative proficiency of isolated compounds from Garcinia nervosa.	/pubmed/28082231	Parveen M, Azaz S, Zafar A, Ahmad F, Silva MR, Silva PS.	J Photochem Photobiol B. 2017 Feb;167:176-188. doi: 10.1016/j.jphotobiol.2016.12.035. Epub 2016 Dec 30.	J Photochem Photobiol B. 2017	PubMed	citation	PMID:28082231	pubmed	28082231	create date:2017/01/14 | first author:Parveen M				Not relevant
[Formula: see text]The statistical crisis in science: how is it relevant to clinical neuropsychology?	/pubmed/28075223	Gelman A, Geurts HM.	Clin Neuropsychol. 2017 Aug - Oct;31(6-7):1000-1014. doi: 10.1080/13854046.2016.1277557. Epub 2017 Jan 11.	Clin Neuropsychol. 2017	PubMed	citation	PMID:28075223	pubmed	28075223	create date:2017/01/12 | first author:Gelman A				Opinion		1	Methodology/ Psychology: Statistics
DNA replication proteins as potential targets for antimicrobials in drug-resistant bacterial pathogens.	/pubmed/28073967	van Eijk E, Wittekoek B, Kuijper EJ, Smits WK.	J Antimicrob Chemother. 2017 May 1;72(5):1275-1284. doi: 10.1093/jac/dkw548.	J Antimicrob Chemother. 2017	PubMed	citation	PMID:28073967 | PMCID:PMC5400081	pubmed	28073967	create date:2017/01/12 | first author:van Eijk E				Not relevant
Detection of Viral RNA in Tissues following Plasma Clearance from an Ebola Virus Infected Patient.	/pubmed/28056096	Biava M, Caglioti C, Bordi L, Castilletti C, Colavita F, Quartu S, Nicastri E, Lauria FN, Petrosillo N, Lanini S, Hoenen T, Kobinger G, Zumla A, Di Caro A, Ippolito G, Capobianchi MR, Lalle E.	PLoS Pathog. 2017 Jan 5;13(1):e1006065. doi: 10.1371/journal.ppat.1006065. eCollection 2017 Jan.	PLoS Pathog. 2017	PubMed	citation	PMID:28056096 | PMCID:PMC5215833	pubmed	28056096	create date:2017/01/06 | first author:Biava M				Not relevant
Peculiarities of Yeasts and Human Telomerase RNAs Processing.	/pubmed/28050263	Rubtsova MP, Vasilkova DP, Naraykina YV, Dontsova OA.	Acta Naturae. 2016 Oct-Dec;8(4):14-22.	Acta Naturae. 2016	PubMed	citation	PMID:28050263 | PMCID:PMC5199203	pubmed	28050263	create date:2017/01/05 | first author:Rubtsova MP				Not relevant
Robust planning of sanitation services in urban informal settlements: An analytical framework.	/pubmed/28038416	Schmitt RJ, Morgenroth E, Larsen TA.	Water Res. 2017 Mar 1;110:297-312. doi: 10.1016/j.watres.2016.12.007. Epub 2016 Dec 11.	Water Res. 2017	PubMed	citation	PMID:28038416	pubmed	28038416	create date:2016/12/31 | first author:Schmitt RJ				Not relevant
Do Student Samples Provide an Accurate Estimate of the General Public?	/pubmed/28002494	Hanel PH, Vione KC.	PLoS One. 2016 Dec 21;11(12):e0168354. doi: 10.1371/journal.pone.0168354. eCollection 2016.	PLoS One. 2016	PubMed	citation	PMID:28002494 | PMCID:PMC5176168	pubmed	28002494	create date:2016/12/22 | first author:Hanel PH				Original research		1	Methodology/ Psychology: Investigates differences between student samples and general public
[Reliability of biomedical research.]	/pubmed/27997004	Andreoletti M.	Recenti Prog Med. 2016 Dec;107(12):622-627. doi: 10.1701/2502.26226. Italian.	Recenti Prog Med. 2016	PubMed	citation	PMID:27997004	pubmed	27997004	create date:2016/12/21 | first author:Andreoletti M				Italian
Publication bias and the canonization of false facts.	/pubmed/27995896	Nissen SB, Magidson T, Gross K, Bergstrom CT.	Elife. 2016 Dec 20;5. pii: e21451. doi: 10.7554/eLife.21451.	Elife. 2016	PubMed	citation	PMID:27995896 | PMCID:PMC5173326	pubmed	27995896	create date:2016/12/21 | first author:Nissen SB				Original research		1	Methodology/ Sciences: Models the effects of publication bias
Can the behavioral sciences self-correct? A social epistemic study.	/pubmed/27938722	Romero F.	Stud Hist Philos Sci. 2016 Dec;60:55-69. doi: 10.1016/j.shpsa.2016.10.002. Epub 2016 Nov 10.	Stud Hist Philos Sci. 2016	PubMed	citation	PMID:27938722	pubmed	27938722	create date:2016/12/13 | first author:Romero F				Original research		1	Methodology/ Behavioural sciences: Statistical modelling of self-correction in behavioural sciences
Safikhani et al. reply.	/pubmed/27905430	Safikhani Z, El-Hachem N, Smirnov P, Freeman M, Goldenberg A, Birkbak NJ, Beck AH, Aerts HJ, Quackenbush J, Haibe-Kains B.	Nature. 2016 Nov 30;540(7631):E2-E4. doi: 10.1038/nature19839. No abstract available.	Nature. 2016	PubMed	citation	PMID:27905430	pubmed	27905909	create date:2016/12/03 | first author:Safikhani Z				Original research		1	Methodology/ Life sciences: Discrepancy between large pharmacogenomic screens
Safikhani et al. reply.	/pubmed/27905423	Safikhani Z, El-Hachem N, Smirnov P, Freeman M, Goldenberg A, Birkbak NJ, Beck AH, Aerts HJ, Quackenbush J, Haibe-Kains B.	Nature. 2016 Nov 30;540(7631):E11-E12. doi: 10.1038/nature20581. No abstract available.	Nature. 2016	PubMed	citation	PMID:27905423	pubmed	27905430	create date:2016/12/03 | first author:Safikhani Z				Original research		1	Methodology/ Life sciences: Discrepancy between large pharmacogenomic screens
Consistency in drug response profiling.	/pubmed/27905421	Mpindi JP, Yadav B, Ã–stling P, Gautam P, Malani D, MurumÃ¤gi A, Hirasawa A, Kangaspeska S, Wennerberg K, Kallioniemi O, Aittokallio T.	Nature. 2016 Nov 30;540(7631):E5-E6. doi: 10.1038/nature20171. No abstract available.	Nature. 2016	PubMed	citation	PMID:27905421	pubmed	27905423	create date:2016/12/03 | first author:Mpindi JP				Original research		1	Methodology/ Life sciences: Consistency between large pharmacogenomic screens
Drug response consistency in CCLE and CGP.	/pubmed/27905419	Bouhaddou M, DiStefano MS, Riesel EA, Carrasco E, Holzapfel HY, Jones DC, Smith GR, Stern AD, Somani SS, Thompson TV, Birtwistle MR.	Nature. 2016 Nov 30;540(7631):E9-E10. doi: 10.1038/nature20580. No abstract available.	Nature. 2016	PubMed	citation	PMID:27905419 | PMCID:PMC5554885	pubmed	27905421	create date:2016/12/03 | first author:Bouhaddou M				Original research		1	Methodology/ Life sciences: Consistency between large pharmacogenomic screens
Safikhani et al. reply.	/pubmed/27905416	Safikhani Z, El-Hachem N, Smirnov P, Freeman M, Goldenberg A, Birkbak NJ, Beck AH, Aerts HJ, Quackenbush J, Haibe-Kains B.	Nature. 2016 Nov 30;540(7631):E6-E8. doi: 10.1038/nature20172. No abstract available.	Nature. 2016	PubMed	citation	PMID:27905416	pubmed	27905419	create date:2016/12/03 | first author:Safikhani Z				Original research		1	Methodology/ Life sciences: Discrepancy between large pharmacogenomic screens
Consistency in large pharmacogenomic studies.	/pubmed/27905415	Geeleher P, Gamazon ER, Seoighe C, Cox NJ, Huang RS.	Nature. 2016 Nov 30;540(7631):E1-E2. doi: 10.1038/nature19838. No abstract available.	Nature. 2016	PubMed	citation	PMID:27905415	pubmed	27905416	create date:2016/12/03 | first author:Geeleher P				Original research		1	Methodology/ Life sciences: Consistency between large pharmacogenomic screens
Development of a measure of model fidelity for mental health Crisis Resolution Teams.	/pubmed/27905909	Lloyd-Evans B, Bond GR, Ruud T, Ivanecka A, Gray R, Osborn D, Nolan F, Henderson C, Mason O, Goater N, Kelly K, Ambler G, Morant N, Onyett S, Lamb D, Fahmy S, Brown E, Paterson B, Sweeney A, Hindle D, Fullarton K, Frerichs J, et al.	BMC Psychiatry. 2016 Dec 1;16(1):427. doi: 10.1186/s12888-016-1139-4.	BMC Psychiatry. 2016	PubMed	citation	PMID:27905909 | PMCID:PMC5133753	pubmed	27905415	create date:2016/12/03 | first author:Lloyd-Evans B				Not relevant
METHODS TO ENSURE THE REPRODUCIBILITY OF BIOMEDICAL RESEARCH.	/pubmed/27896967	Karczewski KJ, Tatonetti NP, Manrai AK, Patel CJ, Titus Brown C, Ioannidis JPA.	Pac Symp Biocomput. 2017;22:117-119. doi: 10.1142/9789813207813_0012.	Pac Symp Biocomput. 2017	PubMed	citation	PMID:27896967	pubmed	27896967	create date:2016/11/30 | first author:Karczewski KJ				Perspective		1	Methodology/ Biomedical research
EMPOWERING MULTI-COHORT GENE EXPRESSION ANALYSIS TO INCREASE REPRODUCIBILITY.	/pubmed/27896970	Haynes WA, Vallania F, Liu C, Bongen E, Tomczak A, Andres-TerrÌ¬ M, Lofgren S, Tam A, Deisseroth CA, Li MD, Sweeney TE, Khatri P.	Pac Symp Biocomput. 2017;22:144-153. doi: 10.1142/9789813207813_0015.	Pac Symp Biocomput. 2017	PubMed	citation	PMID:27896970 | PMCID:PMC5167529	pubmed	27896970	create date:2016/11/30 | first author:Haynes WA				Not relevant
Cytoarchitecture of Zika virus infection in human neuroblastoma and Aedes albopictus cell lines.	/pubmed/27863275	Offerdahl DK, Dorward DW, Hansen BT, Bloom ME.	Virology. 2017 Jan 15;501:54-62. doi: 10.1016/j.virol.2016.11.002. Epub 2016 Nov 16.	Virology. 2017	PubMed	citation	PMID:27863275 | PMCID:PMC5201448	pubmed	27863275	create date:2016/11/20 | first author:Offerdahl DK				Not relevant
Persistent threats to validity in single-group interrupted time series analysis with a cross over design.	/pubmed/27804216	Linden A.	J Eval Clin Pract. 2017 Apr;23(2):419-425. doi: 10.1111/jep.12668. Epub 2016 Nov 1.	J Eval Clin Pract. 2017	PubMed	citation	PMID:27804216	pubmed	27804216	create date:2016/11/03 | first author:Linden A				Original research		1	Methodology/ Social sciences: Development of improved protocols for interrupted time series analysis (ITSA)
The next step in translational research: lessons learned from the first preclinical randomized controlled trial.	/pubmed/26968835	Llovera G, Liesz A.	J Neurochem. 2016 Oct;139 Suppl 2:271-279. doi: 10.1111/jnc.13516. Epub 2016 Mar 10. Review.	J Neurochem. 2016	PubMed	citation	PMID:26968835	pubmed	26968835	create date:2016/11/01 | first author:Llovera G				Review		1	Methodology/ Preclinical research: multicenter preclinical randomized controlled trials (pRCTs)
The impact of fraudulent and irreproducible data to the translational research crisis - solutions and implementation.	/pubmed/27797406	Schulz JB, Cookson MR, Hausmann L.	J Neurochem. 2016 Oct;139 Suppl 2:253-270. doi: 10.1111/jnc.13844. Review.	J Neurochem. 2016	PubMed	citation	PMID:27797406	pubmed	27797406	create date:2016/11/01 | first author:Schulz JB				Perspective		1	Translational Research: General review
Integrated Computational Approach for Virtual Hit Identification against Ebola Viral Proteins VP35 and VP40.	/pubmed/27792169	Mirza MU, Ikram N.	Int J Mol Sci. 2016 Oct 26;17(11). pii: E1748.	Int J Mol Sci. 2016	PubMed	citation	PMID:27792169 | PMCID:PMC5133775	pubmed	27792169	create date:2016/10/30 | first author:Mirza MU				Not relevant
[On-site detection of bioterrorism-relevant agents : Rapid detection methods for viruses, bacteria and toxins - capabilities and limitations].	/pubmed/27778086	Stern D, Richter M, Schrick L, Lasch P, Keeren K, Polleichtner A, Lemmer K, Nitsche A, Grunow R, Herzog C, Dorner BG, Schaade L.	Bundesgesundheitsblatt Gesundheitsforschung Gesundheitsschutz. 2016 Dec;59(12):1577-1586. Review. German.	Bundesgesundheitsblatt Gesundheitsforschung Gesundheitsschutz. 2016	PubMed	citation	PMID:27778086	pubmed	27778086	create date:2016/10/26 | first author:Stern D				German
A 13-year time trend analysis of 3724 small bowel video capsule endoscopies and a forecast model during the financial crisis in Greece.	/pubmed/27775952	Triantafyllou K, Gkolfakis P, Viazis N, Tsibouris P, Tsigaridas A, Apostolopoulos P, Anastasiou J, Hounda E, Skianis I, Katopodi K, Ndini X, Alexandrakis G, Karamanolis DG.	Eur J Gastroenterol Hepatol. 2017 Feb;29(2):185-191. doi: 10.1097/MEG.0000000000000771.	Eur J Gastroenterol Hepatol. 2017	PubMed	citation	PMID:27775952	pubmed	27775952	create date:2016/10/25 | first author:Triantafyllou K				Not relevant
A Tutorial on Hunting Statistical Significance by Chasing N.	/pubmed/27713723	Szucs D.	Front Psychol. 2016 Sep 22;7:1444. eCollection 2016.	Front Psychol. 2016	PubMed	citation	PMID:27713723 | PMCID:PMC5031612	pubmed	27713723	create date:2016/10/08 | first author:Szucs D				Original research		1	Methodology/ Psychology: Demonstrates statistical pitfalls/ data dredging
Never Waste a Good Crisis: Confronting Reproducibility in Translational Research.	/pubmed/27626191	Drucker DJ.	Cell Metab. 2016 Sep 13;24(3):348-360. doi: 10.1016/j.cmet.2016.08.006.	Cell Metab. 2016	PubMed	citation	PMID:27626191	pubmed	27626191	create date:2016/09/15 | first author:Drucker DJ				Perspective		1	Methodology/ Translational Research
Toxicology and the reproducibility crisis: Scientific publishing, hazard assessment and risk characterization.	/pubmed/27609564	Dekant W.	Toxicol Lett. 2016 Nov 30;263:76-77. doi: 10.1016/j.toxlet.2016.09.001. Epub 2016 Sep 5. No abstract available.	Toxicol Lett. 2016	PubMed	citation	PMID:27609564	pubmed	27609564	create date:2016/09/10 | first author:Dekant W				Opinion		1	Methodology/ Toxicology
Venerable brain-cancer cell line faces identity crisis.	/pubmed/27604929	Dolgin E.	Nature. 2016 Sep 8;537(7619):149-50. doi: 10.1038/nature.2016.20515. No abstract available.	Nature. 2016	PubMed	citation	PMID:27604929	pubmed	27604929	create date:2016/09/09 | first author:Dolgin E				News		1	Methodology/ Life sciences: Cell line misauthentication
Authentication and characterisation of a new oesophageal adenocarcinoma cell line: MFD-1.	/pubmed/27600491	Garcia E, Hayden A, Birts C, Britton E, Cowie A, Pickard K, Mellone M, Choh C, Derouet M, Duriez P, Noble F, White MJ, Primrose JN, Strefford JC, Rose-Zerilli M, Thomas GJ, Ang Y, Sharrocks AD, Fitzgerald RC, Underwood TJ; OCCAMS consortium..	Sci Rep. 2016 Sep 7;6:32417. doi: 10.1038/srep32417.	Sci Rep. 2016	PubMed	citation	PMID:27600491 | PMCID:PMC5013399	pubmed	27600491	create date:2016/09/08 | first author:Garcia E				Not relevant
Origin of the U87MG glioma cell line: Good news and bad news.	/pubmed/27582061	Allen M, Bjerke M, Edlund H, Nelander S, Westermark B.	Sci Transl Med. 2016 Aug 31;8(354):354re3. doi: 10.1126/scitranslmed.aaf6853.	Sci Transl Med. 2016	PubMed	citation	PMID:27582061	pubmed	27582061	create date:2016/09/02 | first author:Allen M				Original research		1	Methodology/ Life sciences: Cell line misauthentication
Multiscale approaches to crowd dynamics and the reliability of data from experiments: Comment on "Human behaviours in evacuation crowd dynamics: From modelling to "big data" toward crisis management" by Nicola Bellomo et al.	/pubmed/27555446	Piccoli B.	Phys Life Rev. 2016 Sep;18:46-47. doi: 10.1016/j.plrev.2016.08.003. Epub 2016 Aug 12. No abstract available.	Phys Life Rev. 2016	PubMed	citation	PMID:27555446	pubmed	27555446	create date:2016/08/25 | first author:Piccoli B				Not relevant
Acute Liver Damage Associated with Innate Immune Activation in a Small Nonhuman Primate Model of Hepacivirus Infection.	/pubmed/27489267	Manickam C, Rajakumar P, Wachtman L, Kramer JA, Martinot AJ, Varner V, Giavedoni LD, Reeves RK.	J Virol. 2016 Sep 29;90(20):9153-62. doi: 10.1128/JVI.01051-16. Print 2016 Oct 15.	J Virol. 2016	PubMed	citation	PMID:27489267 | PMCID:PMC5044824	pubmed	27489267	create date:2016/08/05 | first author:Manickam C				Not relevant
Is There a Free Lunch in Inference?	/pubmed/27489199	Rouder JN, Morey RD, Verhagen J, Province JM, Wagenmakers EJ.	Top Cogn Sci. 2016 Jul;8(3):520-47. doi: 10.1111/tops.12214.	Top Cogn Sci. 2016	PubMed	citation	PMID:27489199	pubmed	27489199	create date:2016/08/05 | first author:Rouder JN				Original research		1	Methodology/ Psychology: Statistical methods
Functional Authentication of a Novel Gastropod Gonadotropin-Releasing Hormone Receptor Reveals Unusual Features and Evolutionary Insight.	/pubmed/27467252	Kavanaugh SI, Tsai PS.	PLoS One. 2016 Jul 28;11(7):e0160292. doi: 10.1371/journal.pone.0160292. eCollection 2016.	PLoS One. 2016	PubMed	citation	PMID:27467252 | PMCID:PMC4964986	pubmed	27467252	create date:2016/07/29 | first author:Kavanaugh SI				Not relevant
Assessment of pharmacogenomic agreement.	/pubmed/27408686	Safikhani Z, El-Hachem N, Quevedo R, Smirnov P, Goldenberg A, Juul Birkbak N, Mason C, Hatzis C, Shi L, Aerts HJ, Quackenbush J, Haibe-Kains B.	F1000Res. 2016 May 9;5:825. doi: 10.12688/f1000research.8705.1. eCollection 2016.	F1000Res. 2016	PubMed	citation	PMID:27408686 | PMCID:PMC4926729	pubmed	27456714	create date:2016/07/14 | first author:Safikhani Z				Original research		1	Methodology/ Life sciences: Discrepancy between large pharmacogenomic screens
Genetic variability in a frozen batch of MCF-7 cells invisible in routine authentication affecting cell function.	/pubmed/27456714	Kleensang A, Vantangoli MM, Odwin-DaCosta S, Andersen ME, Boekelheide K, Bouhifd M, Fornace AJ Jr, Li HH, Livi CB, Madnick S, Maertens A, Rosenberg M, Yager JD, Zhaog L, Hartung T.	Sci Rep. 2016 Jul 26;6:28994. doi: 10.1038/srep28994.	Sci Rep. 2016	PubMed	citation	PMID:27456714 | PMCID:PMC4960662	pubmed	27408686	create date:2016/07/28 | first author:Kleensang A				Original research		1	Methodology/ Life sciences: Cell line authentication
The reproducibility issue and preclinical academic drug discovery: educational and institutional initiatives fostering translation success.	/pubmed/27401809	Janero DR.	Expert Opin Drug Discov. 2016 Sep;11(9):835-42. doi: 10.1080/17460441.2016.1212014. Epub 2016 Jul 25. Review.	Expert Opin Drug Discov. 2016	PubMed	citation	PMID:27401809	pubmed	27401809	create date:2016/07/13 | first author:Janero DR				Review		1	Incentives/ Translational research
[Letter to the Editor] The need for improved education and training in research antibody usage and validation practices.	/pubmed/27401669	Freedman LP, Gibson MC, Bradbury AR, Buchberg AM, Davis D, Dolled-Filhart MP, Lund-Johansen F, Rimm DL.	Biotechniques. 2016 Jul 1;61(1):16-8. doi: 10.2144/000114431. eCollection 2016.	Biotechniques. 2016	PubMed	citation	PMID:27401669	pubmed	27401669	create date:2016/07/13 | first author:Freedman LP				Letter to the Editor		1	Methodology/ Life sciences: Use of antibodies
A Practical Guide for Improving Transparency and Reproducibility in Neuroimaging Research.	/pubmed/27389358	Gorgolewski KJ, Poldrack RA.	PLoS Biol. 2016 Jul 7;14(7):e1002506. doi: 10.1371/journal.pbio.1002506. eCollection 2016 Jul.	PLoS Biol. 2016	PubMed	citation	PMID:27389358 | PMCID:PMC4936733	pubmed	27389358	create date:2016/07/09 | first author:Gorgolewski KJ				Perspective		1	Methodology/ Neuroimaging
Beyond p-values in the evaluation of brain-computer interfaces: A Bayesian estimation approach.	/pubmed/27317498	Melinscak F, Montesano L.	J Neurosci Methods. 2016 Sep 1;270:30-45. doi: 10.1016/j.jneumeth.2016.06.008. Epub 2016 Jun 15.	J Neurosci Methods. 2016	PubMed	citation	PMID:27317498	pubmed	27317498	create date:2016/06/19 | first author:Melinscak F				Original research		1	Methodology/ Neurosciences: Statistical methods
Authentication: A Standard Problem or a Problem of Standards?	/pubmed/27300550	Capes-Davis A, Neve RM.	PLoS Biol. 2016 Jun 14;14(6):e1002477. doi: 10.1371/journal.pbio.1002477. eCollection 2016 Jun.	PLoS Biol. 2016	PubMed	citation	PMID:27300550 | PMCID:PMC4907433	pubmed	27300550	create date:2016/06/15 | first author:Capes-Davis A				Perspective		1	Methodology/ Life sciences: Cell line authentication
Standards for Cell Line Authentication and Beyond.	/pubmed/27300367	Almeida JL, Cole KD, Plant AL.	PLoS Biol. 2016 Jun 14;14(6):e1002476. doi: 10.1371/journal.pbio.1002476. eCollection 2016 Jun.	PLoS Biol. 2016	PubMed	citation	PMID:27300367 | PMCID:PMC4907466	pubmed	27300367	create date:2016/06/15 | first author:Almeida JL				Perspective		1	Methodology/ Life sciences: Cell line authentication
Characterization of fibroblast-free CWR-R1ca castration-recurrent prostate cancer cell line.	/pubmed/27271795	Shourideh M, DePriest A, Mohler JL, Wilson EM, Koochekpour S.	Prostate. 2016 Sep;76(12):1067-77. doi: 10.1002/pros.23190. Epub 2016 Jun 8.	Prostate. 2016	PubMed	citation	PMID:27271795	pubmed	27271795	create date:2016/06/09 | first author:Shourideh M				Not relevant
Heparin centenary - an ever-young life-saving drug.	/pubmed/27264864	Torri G, Naggi A.	Int J Cardiol. 2016 Jun;212 Suppl 1:S1-4. doi: 10.1016/S0167-5273(16)12001-7.	Int J Cardiol. 2016	PubMed	citation	PMID:27264864	pubmed	27264864	create date:2016/06/07 | first author:Torri G				Not relevant
Psychology, replication & beyond.	/pubmed/27251381	Laws KR.	BMC Psychol. 2016 Jun 1;4(1):30. doi: 10.1186/s40359-016-0135-2.	BMC Psychol. 2016	PubMed	citation	PMID:27251381 | PMCID:PMC4888260	pubmed	27251381	create date:2016/06/03 | first author:Laws KR				Editorial		1	Methodology/ Psychology
1,500 scientists lift the lid on reproducibility.	/pubmed/27225100	Baker M.	Nature. 2016 May 26;533(7604):452-4. doi: 10.1038/533452a. No abstract available.	Nature. 2016	PubMed	citation	PMID:27225100	pubmed	27225100	create date:2016/05/27 | first author:Baker M				Survey		1	Survey
Reality check on reproducibility.	/pubmed/27225078	[No authors listed]	Nature. 2016 May 26;533(7604):437. doi: 10.1038/533437a. No abstract available.	Nature. 2016	PubMed	citation	PMID:27225078	pubmed	27225078	create date:2016/05/27				Editorial		1	Methodology/ Sciences in general
The Priority position paper: Protecting Europe's food chain from prions.	/pubmed/27220820	Requena JR, Kristensson K, Korth C, Zurzolo C, Simmons M, Aguilar-Calvo P, Aguzzi A, Andreoletti O, Benestad SL, BÌ¦hm R, Brown K, Calgua B, Del RÌ_o JA, Espinosa JC, Girones R, Godsave S, Hoelzle LE, Knittler MR, Kuhn F, Legname G, Laeven P, Mabbott N, et al.	Prion. 2016 May 3;10(3):165-81. doi: 10.1080/19336896.2016.1175801.	Prion. 2016	PubMed	citation	PMID:27220820 | PMCID:PMC4981192	pubmed	27220820	create date:2016/05/26 | first author:Requena JR				Not relevant
Reproducibility Crisis: Are We Ignoring Reaction Norms?	/pubmed/27211784	Voelkl B, WÌ_rbel H.	Trends Pharmacol Sci. 2016 Jul;37(7):509-10. doi: 10.1016/j.tips.2016.05.003. Epub 2016 May 20. No abstract available.	Trends Pharmacol Sci. 2016	PubMed	citation	PMID:27211784	pubmed	27211784	create date:2016/05/24 | first author:Voelkl B				Comment		1	Methodology/ Preclinical research
Assessing the stochastic variability of the Benefit-Cost ratio in roadway safety management.	/pubmed/27208591	Cafiso S, D'Agostino C.	Accid Anal Prev. 2016 Aug;93:189-97. doi: 10.1016/j.aap.2016.04.027. Epub 2016 May 19.	Accid Anal Prev. 2016	PubMed	citation	PMID:27208591	pubmed	27208591	create date:2016/05/22 | first author:Cafiso S				Not relevant
The Experiment Factory: Standardizing Behavioral Experiments.	/pubmed/27199843	Sochat VV, Eisenberg IW, Enkavi AZ, Li J, Bissett PG, Poldrack RA.	Front Psychol. 2016 Apr 26;7:610. doi: 10.3389/fpsyg.2016.00610. eCollection 2016.	Front Psychol. 2016	PubMed	citation	PMID:27199843 | PMCID:PMC4844768	pubmed	27199843	create date:2016/05/21 | first author:Sochat VV				Technology report		1	Methodology/ Psychology: Provides an open access tool to standardise behavioural studies
Rapid Inhibition Profiling in Bacillus subtilis to Identify the Mechanism of Action of New Antimicrobials.	/pubmed/27193499	Lamsa A, Lopez-Garrido J, Quach D, Riley EP, Pogliano J, Pogliano K.	ACS Chem Biol. 2016 Aug 19;11(8):2222-31. doi: 10.1021/acschembio.5b01050. Epub 2016 Jun 14.	ACS Chem Biol. 2016	PubMed	citation	PMID:27193499 | PMCID:PMC5459310	pubmed	27193499	create date:2016/05/20 | first author:Lamsa A				Not relevant
A Toolbox for Quantitative Gene Expression in Varroa destructor: RNA Degradation in Field Samples and Systematic Analysis of Reference Gene Stability.	/pubmed/27182699	Campbell EM, McIntosh CH, Bowman AS.	PLoS One. 2016 May 16;11(5):e0155640. doi: 10.1371/journal.pone.0155640. eCollection 2016.	PLoS One. 2016	PubMed	citation	PMID:27182699 | PMCID:PMC4868281	pubmed	27182699	create date:2016/05/18 | first author:Campbell EM				Not relevant
A mechanistic evaluation of the Syrian hamster embryo cell transformation assay (pH 6.7) and molecular events leading to senescence bypass in SHE cells.	/pubmed/27169376	Pickles JC, Pant K, Mcginty LA, Yasaei H, Roberts T, Scott AD, Newbold RF.	Mutat Res Genet Toxicol Environ Mutagen. 2016 May;802:50-8. doi: 10.1016/j.mrgentox.2016.04.002. Epub 2016 Apr 9.	Mutat Res Genet Toxicol Environ Mutagen. 2016	PubMed	citation	PMID:27169376 | PMCID:PMC4877681	pubmed	27169376	create date:2016/05/14 | first author:Pickles JC				Not relevant
The Galaxy platform for accessible, reproducible and collaborative biomedical analyses: 2016 update.	/pubmed/27137889	Afgan E, Baker D, van den Beek M, Blankenberg D, Bouvier D, €Îech M, Chilton J, Clements D, Coraor N, Eberhard C, GrÌ_ning B, Guerler A, Hillman-Jackson J, Von Kuster G, Rasche E, Soranzo N, Turaga N, Taylor J, Nekrutenko A, Goecks J.	Nucleic Acids Res. 2016 Jul 8;44(W1):W3-W10. doi: 10.1093/nar/gkw343. Epub 2016 May 2.	Nucleic Acids Res. 2016	PubMed	citation	PMID:27137889 | PMCID:PMC4987906	pubmed	27137889	create date:2016/05/04 | first author:Afgan E				Web server		1	Methodology/ Life sciences: Galaxy provides advanced computational tools usable by non experts.
Improving the rigor of psychophysiology research.	/pubmed/27133157	Baldwin SA.	Int J Psychophysiol. 2017 Jan;111:5-16. doi: 10.1016/j.ijpsycho.2016.04.006. Epub 2016 Apr 29.	Int J Psychophysiol. 2017	PubMed	citation	PMID:27133157	pubmed	27133157	create date:2016/05/03 | first author:Baldwin SA				Viewpoint/ methodology		1	Psychology
Changes of heterogeneous cell populations in the Ishikawa cell line during long-term culture: Proposal for an in vitro clonal evolution model of tumor cells.	/pubmed/27107655	Kasai F, Hirayama N, Ozawa M, Iemura M, Kohara A.	Genomics. 2016 Jun;107(6):259-66. doi: 10.1016/j.ygeno.2016.04.003. Epub 2016 Apr 20.	Genomics. 2016	PubMed	citation	PMID:27107655	pubmed	27107655	create date:2016/04/25 | first author:Kasai F				Not relevant
[Measurement of unemployment-related psychological stress: Validation of the Unemployment Stress (USS)].	/pubmed/27091921	SzabÌ_nÌ© KapuvÌÁri V, Martos T.	Psychiatr Hung. 2016;31(1):30-9. Hungarian.	Psychiatr Hung. 2016	PubMed	citation	PMID:27091921	pubmed	27091921	create date:2016/04/20 | first author:SzabÌ_nÌ© KapuvÌÁri V				Hungarian
[Current seroprevalence, vaccination and predictive value of liver enzymes for hepatitis B among refugees in Germany].	/pubmed/27090247	Hampel A, Solbach P, Cornberg M, Schmidt RE, Behrens GM, Jablonka A.	Bundesgesundheitsblatt Gesundheitsforschung Gesundheitsschutz. 2016 May;59(5):578-83. doi: 10.1007/s00103-016-2333-8. German.	Bundesgesundheitsblatt Gesundheitsforschung Gesundheitsschutz. 2016	PubMed	citation	PMID:27090247	pubmed	27090247	create date:2016/04/20 | first author:Hampel A				German
The genomic characteristics and cellular origin of chromothripsis.	/pubmed/27023493	StorchovÌÁ Z, Kloosterman WP.	Curr Opin Cell Biol. 2016 Jun;40:106-113. doi: 10.1016/j.ceb.2016.03.003. Epub 2016 Mar 26. Review.	Curr Opin Cell Biol. 2016	PubMed	citation	PMID:27023493	pubmed	27023493	create date:2016/03/30 | first author:StorchovÌÁ Z				Not relevant
Quality Issues of Research Antibodies.	/pubmed/27013861	Weller MG.	Anal Chem Insights. 2016 Mar 20;11:21-7. doi: 10.4137/ACI.S31614. eCollection 2016. Review.	Anal Chem Insights. 2016	PubMed	citation	PMID:27013861 | PMCID:PMC4803150	pubmed	27013861	create date:2016/03/26 | first author:Weller MG				Perspective		1	Methodology/ Life sciences: Antibody quality
Quality Assurance in the Polio Laboratory. Cell Sensitivity and Cell Authentication Assays.	/pubmed/26983732	Dunn G.	Methods Mol Biol. 2016;1387:109-27. doi: 10.1007/978-1-4939-3292-4_6.	Methods Mol Biol. 2016	PubMed	citation	PMID:26983732	pubmed	26983732	create date:2016/03/18 | first author:Dunn G				Review		1	Methodology/ Life sciences: Cell line authentication
The Problem of False Discovery: Many Scientific Results Can't Be Replicated, Leading to Serious Questions about What's True and False in the World of Research.	/pubmed/26978851	Foster KR, Skufca J.	IEEE Pulse. 2016 Mar-Apr;7(2):37-40. doi: 10.1109/MPUL.2015.2513726.	IEEE Pulse. 2016	PubMed	citation	PMID:26978851	pubmed	26978851	create date:2016/03/16 | first author:Foster KR				Review		1	Sciences
Simulation Testing for Selection of Critical Care Medicine Trainees. A Pilot Feasibility Study.	/pubmed/26967948	Cocciante AG, Nguyen MN, Marane CF, Panayiotou AE, Karahalios A, Beer JA, Johal N, Morris J, Turner S, Hessian EC.	Ann Am Thorac Soc. 2016 Apr;13(4):529-35. doi: 10.1513/AnnalsATS.201601-012OC.	Ann Am Thorac Soc. 2016	PubMed	citation	PMID:26967948	pubmed	26967948	create date:2016/03/12 | first author:Cocciante AG				Not relevant
Evaluating replicability of laboratory experiments in economics.	/pubmed/26940865	Camerer CF, Dreber A, Forsell E, Ho TH, Huber J, Johannesson M, Kirchler M, Almenberg J, Altmejd A, Chan T, Heikensten E, Holzmeister F, Imai T, Isaksson S, Nave G, Pfeiffer T, Razen M, Wu H.	Science. 2016 Mar 25;351(6280):1433-6. doi: 10.1126/science.aaf0918. Epub 2016 Mar 3.	Science. 2016	PubMed	citation	PMID:26940865	pubmed	26940865	create date:2016/03/05 | first author:Camerer CF				Confirmation study		1	Economics
The human ovarian cancer cell line CABAÂ I: A peculiar genetic evolution.	/pubmed/26934856	Giusti I, Cervelli C, D'Ascenzo S, Di Francesco M, Ligas C, D'Alessandro E, Papola F, Dolo V.	Int J Mol Med. 2016 Apr;37(4):879-88. doi: 10.3892/ijmm.2016.2501. Epub 2016 Feb 25.	Int J Mol Med. 2016	PubMed	citation	PMID:26934856 | PMCID:PMC4790663	pubmed	26934856	create date:2016/03/05 | first author:Giusti I				Not relevant
Raising the standards of stem cell line quality.	/pubmed/26911906	Yaffe MP, Noggle SA, Solomon SL.	Nat Cell Biol. 2016 Mar;18(3):236-7. doi: 10.1038/ncb3313. Review.	Nat Cell Biol. 2016	PubMed	citation	PMID:26911906	pubmed	26911906	create date:2016/02/26 | first author:Yaffe MP				Review		1	Methodology/ Life sciences: Stem cell authentication and quality
Authentication of experimental materials: A remedy for the reproducibility crisis?	/pubmed/26900588	Li F, Hu J, Xie K, He TC.	Genes Dis. 2015 Dec;2(4):283. Epub 2015 Jul 7. No abstract available.	Genes Dis. 2015	PubMed	citation	PMID:26900588 | PMCID:PMC4758512	pubmed	26900588	create date:2016/02/24 | first author:Li F				Comment		1	Methodology/ Life sciences: Authentication of materials/ reagents
Drug repurposing to target Ebola virus replication and virulence using structural systems pharmacology.	/pubmed/26887654	Zhao Z, Martin C, Fan R, Bourne PE, Xie L.	BMC Bioinformatics. 2016 Feb 18;17:90. doi: 10.1186/s12859-016-0941-9.	BMC Bioinformatics. 2016	PubMed	citation	PMID:26887654 | PMCID:PMC4757998	pubmed	26887654	create date:2016/02/19 | first author:Zhao Z				Not relevant
Rigor and replication in time-frequency analyses of cognitive electrophysiology data.	/pubmed/26876335	Cohen MX.	Int J Psychophysiol. 2017 Jan;111:80-87. doi: 10.1016/j.ijpsycho.2016.02.001. Epub 2016 Feb 11.	Int J Psychophysiol. 2017	PubMed	citation	PMID:26876335	pubmed	26876335	create date:2016/02/16 | first author:Cohen MX				Perspective		1	Methodology/ Neurosciences
When Quality Beats Quantity: Decision Theory, Drug Discovery, and the Reproducibility Crisis.	/pubmed/26863229	Scannell JW, Bosley J.	PLoS One. 2016 Feb 10;11(2):e0147215. doi: 10.1371/journal.pone.0147215. eCollection 2016.	PLoS One. 2016	PubMed	citation	PMID:26863229 | PMCID:PMC4749240	pubmed	26863229	create date:2016/02/11 | first author:Scannell JW				Original research		1	Methodology/ Drug discovery
Validity and reliability of a novel Color-Risk Psychiatric Triage in a psychiatric emergency department.	/pubmed/26860593	Molina-LÌ_pez A, Cruz-Islas JB, Palma-CortÌ©s M, Guizar-SÌÁnchez DP, Garfias-Rau CY, Ontiveros-Uribe MP, FresÌÁn-Orellana A.	BMC Psychiatry. 2016 Feb 10;16:30. doi: 10.1186/s12888-016-0727-7.	BMC Psychiatry. 2016	PubMed	citation	PMID:26860593 | PMCID:PMC4748451	pubmed	26860593	create date:2016/02/11 | first author:Molina-LÌ_pez A				Not relevant
How to avoid pitfalls in antibody use.	/pubmed/26834988	Pauly D, Hanack K.	F1000Res. 2015 Sep 7;4:691. doi: 10.12688/f1000research.6894.1. eCollection 2015.	F1000Res. 2015	PubMed	citation	PMID:26834988 | PMCID:PMC4722690	pubmed	26834988	create date:2016/02/03 | first author:Pauly D				Opinion		1	Methodology/ Life sciences: Antibody quality
Alteration of STR profiles in ovarian carcinoma cells during primary culture.	/pubmed/26825732	Huang X, Weimer J, von Wurmb-Schwark N, Fredrik R, Arnold N, Schem C.	Arch Gynecol Obstet. 2016 Aug;294(2):369-76. doi: 10.1007/s00404-016-4018-9. Epub 2016 Jan 29.	Arch Gynecol Obstet. 2016	PubMed	citation	PMID:26825732	pubmed	26825732	create date:2016/01/31 | first author:Huang X				Not relevant
Multivariate Calibration Approach for Quantitative Determination of Cell-Line Cross Contamination by Intact Cell Mass Spectrometry and Artificial Neural Networks.	/pubmed/26821236	Valletta E, KuÄera L, ProkeÅ¡ L, Amato F, Pivetta T, Hampl A, Havel J, VaÅˆhara P.	PLoS One. 2016 Jan 28;11(1):e0147414. doi: 10.1371/journal.pone.0147414. eCollection 2016.	PLoS One. 2016	PubMed	citation	PMID:26821236 | PMCID:PMC4731057	pubmed	26821236	create date:2016/01/29 | first author:Valletta E				Not relevant
L-Arginine ethylester enhances in vitro amplification of PrP(Sc) in macaques with atypical L-type bovine spongiform encephalopathy and enables presymptomatic detection of PrP(Sc) in the bodily fluids.	/pubmed/26802462	Murayama Y, Ono F, Shimozaki N, Shibata H.	Biochem Biophys Res Commun. 2016 Feb 12;470(3):563-568. doi: 10.1016/j.bbrc.2016.01.105. Epub 2016 Jan 21.	Biochem Biophys Res Commun. 2016	PubMed	citation	PMID:26802462	pubmed	26802462	create date:2016/01/24 | first author:Murayama Y				Not relevant
The Internal Reliability of Family Crisis Oriented Personal Evaluation Scale (F-COPES) in Malay version among caregivers of individual with learning disabilities.	/pubmed/26794817	Alwi N, Harun D, Omar B, Ahmad M, Zagan M, Leonard JH.	Clin Ter. 2015 Nov-Dec;166(6):e361-4. doi: 10.7417/T.2015.1901.	Clin Ter. 2015	PubMed	citation	PMID:26794817	pubmed	26794817	create date:2016/01/23 | first author:Alwi N				Not relevant
Update of the human parvovirus B19 biology.	/pubmed/26778837	Servant-Delmas A, Morinet F.	Transfus Clin Biol. 2016 Feb;23(1):5-12. doi: 10.1016/j.tracli.2015.11.006. Epub 2016 Jan 6. Review.	Transfus Clin Biol. 2016	PubMed	citation	PMID:26778837	pubmed	26778837	create date:2016/01/19 | first author:Servant-Delmas A				Not relevant
Irreproducibility in Preclinical Biomedical Research: Perceptions, Uncertainties, and Knowledge Gaps.	/pubmed/26776451	Jarvis MF, Williams M.	Trends Pharmacol Sci. 2016 Apr;37(4):290-302. doi: 10.1016/j.tips.2015.12.001. Epub 2016 Jan 6. Review.	Trends Pharmacol Sci. 2016	PubMed	citation	PMID:26776451	pubmed	26776451	create date:2016/01/19 | first author:Jarvis MF				Review		1	Methodology/ Preclinical research: General review
Inference Based on the Best-Fitting Model can Contribute to the Replication Crisis: Assessing Model Selection Uncertainty Using a Bootstrap Approach.	/pubmed/28663687	Lubke GH, Campbell I.	Struct Equ Modeling. 2016;23(4):479-490. doi: 10.1080/10705511.2016.1141355. Epub 2016 Apr 7.	Struct Equ Modeling. 2016	PubMed	citation	PMID:28663687 | PMCID:PMC5487004	pubmed	28663687	create date:2016/01/01 | first author:Lubke GH				Original research		1	Methodology/ Modelling
New Minimum Relative Humidity Requirements Are Expected to Lead to More Medical Device Failures.	/pubmed/26660689	Kohani M, Pecht M.	J Med Syst. 2016 Mar;40(3):58. doi: 10.1007/s10916-015-0421-1. Epub 2015 Dec 10. Erratum in: J Med Syst. 2016 Apr;40(4):86.	J Med Syst. 2016	PubMed	citation	PMID:26660689	pubmed	26660689	create date:2015/12/15 | first author:Kohani M				Not relevant
Development and Evaluation of the Telephone Crisis Support Skills Scale.	/pubmed/26648228	Kitchingman TA, Wilson CJ, Caputi P, Woodward A, Hunt T.	Crisis. 2015;36(6):407-15. doi: 10.1027/0227-5910/a000341.	Crisis. 2015	PubMed	citation	PMID:26648228	pubmed	26648228	create date:2015/12/10 | first author:Kitchingman TA				Not relevant
Too Much to Bear: Psychometric Evidence Supporting the Perceived Burdensomeness Scale.	/pubmed/26620916	Peak NJ, Overholser JC, Ridley J, Braden A, Fisher L, Bixler J, Chandler M.	Crisis. 2016;37(1):59-67. doi: 10.1027/0227-5910/a000355. Epub 2015 Dec 1.	Crisis. 2016	PubMed	citation	PMID:26620916	pubmed	26620916	create date:2015/12/02 | first author:Peak NJ				Not relevant
A Short (Personal) Future History of Revolution 2.0.	/pubmed/26581743	Spellman BA.	Perspect Psychol Sci. 2015 Nov;10(6):886-99. doi: 10.1177/1745691615609918.	Perspect Psychol Sci. 2015	PubMed	citation	PMID:26581743	pubmed	26581743	create date:2015/11/20 | first author:Spellman BA				Perspective		1	Methodolody/ Primarily Psychology but also touches other disciplines
Complex interactions between the DNA-damage response and mammalian telomeres.	/pubmed/26581520	Arnoult N, Karlseder J.	Nat Struct Mol Biol. 2015 Nov;22(11):859-66. doi: 10.1038/nsmb.3092. Review.	Nat Struct Mol Biol. 2015	PubMed	citation	PMID:26581520 | PMCID:PMC4739752	pubmed	26581520	create date:2015/11/20 | first author:Arnoult N				Not relevant
Pharmacogenomic agreement between two cancer cell line data sets.	/pubmed/26570998	Cancer Cell Line Encyclopedia Consortium.; Genomics of Drug Sensitivity in Cancer Consortium..	Nature. 2015 Dec 3;528(7580):84-7. doi: 10.1038/nature15736. Epub 2015 Nov 16.	Nature. 2015	PubMed	citation	PMID:26570998	pubmed	26578277	create date:2015/11/17 | first author:Cancer Cell Line Encyclopedia Consortium.				Original research		1	Methodology/ Life sciences: Consistency between large pharmacogenomic screens
Fool-proofing design and crisis management for customized intelligent physical fitness and healthcare system.	/pubmed/26578277	Huang CC, Huang CL, Liu HM.	Technol Health Care. 2015;24 Suppl 1:S407-13. doi: 10.3233/THC-151107.	Technol Health Care. 2015	PubMed	citation	PMID:26578277	pubmed	26570998	create date:2015/11/19 | first author:Huang CC				Not relevant
The Healthy Weight Disparity Index: Why We Need It to Solve the Obesity Crisis.	/pubmed/26548672	Taylor WC, Paxton RJ, Fischer LS, Bellows LL.	J Health Care Poor Underserved. 2015 Nov;26(4):1186-99. doi: 10.1353/hpu.2015.0132.	J Health Care Poor Underserved. 2015	PubMed	citation	PMID:26548672	pubmed	26548672	create date:2015/11/10 | first author:Taylor WC				Not relevant
Measuring Limit-Setting Practices Used by Family Members Towards Relatives with Psychiatric Disorders.	/pubmed/26518780	Labrum T, Walk M, Solomon PL.	Psychiatr Q. 2016 Sep;87(3):465-77. doi: 10.1007/s11126-015-9400-4.	Psychiatr Q. 2016	PubMed	citation	PMID:26518780	pubmed	26518780	create date:2015/11/01 | first author:Labrum T				Not relevant
[Background and practical use of the assessment of identity development in adolescence (AIDA)].	/pubmed/26493481	BirkhÌ¦lzer M, Goth K, Schrobildgen C, Schmeck K, SchlÌ_ter-MÌ_ller S.	Prax Kinderpsychol Kinderpsychiatr. 2015;64(8):584-600. doi: 10.13109/prkk.2015.64.8.584. German.	Prax Kinderpsychol Kinderpsychiatr. 2015	PubMed	citation	PMID:26493481	pubmed	26493481	create date:2015/10/27 | first author:BirkhÌ¦lzer M				German
Construction and initial validation of the Multiracial Experiences Measure (MEM).	/pubmed/26460977	Yoo HC, Jackson KF, Guevarra RP, Miller MJ, Harrington B.	J Couns Psychol. 2016 Mar;63(2):198-209. doi: 10.1037/cou0000117. Epub 2015 Oct 12.	J Couns Psychol. 2016	PubMed	citation	PMID:26460977 | PMCID:PMC4777648	pubmed	26460977	create date:2015/10/16 | first author:Yoo HC				Not relevant
The culture of cell culture practices and authentication--Results from a 2015 Survey.	/pubmed/26458546	Freedman LP, Gibson MC, Wisman R, Ethier SP, Soule HR, Reid YA, Neve RM.	Biotechniques. 2015 Oct 1;59(4):189-90, 192. doi: 10.2144/000114344. eCollection 2015 Oct. No abstract available.	Biotechniques. 2015	PubMed	citation	PMID:26458546	pubmed	26458546	create date:2015/10/16 | first author:Freedman LP				Original research		1	Methodology/ Life sciences: Cell line misauthentication
A ëÈ Cro-Like Repressor Is Essential for the Induction of Conjugative Transfer of SXT/R391 Elements in Response to DNA Damage.	/pubmed/26438816	Poulin-Laprade D, Burrus V.	J Bacteriol. 2015 Dec;197(24):3822-33. doi: 10.1128/JB.00638-15. Epub 2015 Oct 5.	J Bacteriol. 2015	PubMed	citation	PMID:26438816 | PMCID:PMC4652052	pubmed	26438816	create date:2015/10/07 | first author:Poulin-Laprade D				Not relevant
Authentication of newly established human esophageal squamous cell carcinoma cell line (YM-1) using short tandem repeat (STR) profiling method.	/pubmed/26432330	Ayyoob K, Masoud K, Vahideh K, Jahanbakhsh A.	Tumour Biol. 2016 Mar;37(3):3197-204. doi: 10.1007/s13277-015-4133-4. Epub 2015 Oct 2.	Tumour Biol. 2016	PubMed	citation	PMID:26432330	pubmed	26432330	create date:2015/10/04 | first author:Ayyoob K				Not relevant
Tackling reproducibility in academic preclinical drug discovery.	/pubmed/26388229	Frye SV, Arkin MR, Arrowsmith CH, Conn PJ, Glicksman MA, Hull-Ryde EA, Slusher BS.	Nat Rev Drug Discov. 2015 Nov;14(11):733-4. doi: 10.1038/nrd4737. Epub 2015 Sep 21.	Nat Rev Drug Discov. 2015	PubMed	citation	PMID:26388229	pubmed	26388229	create date:2015/09/22 | first author:Frye SV				Comment		1	Methodology/ Drug discovery
Diagnosis and Assessment of NAFLD: Definitions and Histopathological Classification.	/pubmed/26378639	Burt AD, Lackner C, Tiniakos DG.	Semin Liver Dis. 2015 Aug;35(3):207-20. doi: 10.1055/s-0035-1562942. Epub 2015 Sep 17. Review.	Semin Liver Dis. 2015	PubMed	citation	PMID:26378639	pubmed	26378639	create date:2015/09/18 | first author:Burt AD				Not relevant
Investigating the validity and usability of an interactive computer programme for assessing competence in telephone-based mental health triage.	/pubmed/26365233	Sands N, Elsom S, Keppich-Arnold S, Henderson K, King P, Bourke-Finn K, Brunning D.	Int J Ment Health Nurs. 2016 Feb;25(1):80-6. doi: 10.1111/inm.12165. Epub 2015 Sep 14.	Int J Ment Health Nurs. 2016	PubMed	citation	PMID:26365233	pubmed	26365233	create date:2015/09/15 | first author:Sands N				Not relevant
Everybody knows psychology is not a real science": Public perceptions of psychology and how we can improve our relationship with policymakers, the scientific community, and the general public.	/pubmed/26348335	Ferguson CJ.	Am Psychol. 2015 Sep;70(6):527-42. doi: 10.1037/a0039405.	Am Psychol. 2015	PubMed	citation	PMID:26348335	pubmed	26348335	create date:2015/09/09 | first author:Ferguson CJ				Not relevant
Is psychology suffering from a replication crisis? What does "failure to replicate" really mean?	/pubmed/26348332	Maxwell SE, Lau MY, Howard GS.	Am Psychol. 2015 Sep;70(6):487-98. doi: 10.1037/a0039400.	Am Psychol. 2015	PubMed	citation	PMID:26348332	pubmed	26348332	create date:2015/09/09 | first author:Maxwell SE				Perspective		1	Methodology/ Psychology: Suggests improved statistical methods
Robust research: Institutions must do their part for reproducibility.	/pubmed/26333454	Begley CG, Buchan AM, Dirnagl U.	Nature. 2015 Sep 3;525(7567):25-7. doi: 10.1038/525025a. No abstract available.	Nature. 2015	PubMed	citation	PMID:26333454	pubmed	26333454	create date:2015/09/04 | first author:Begley CG				Comment		1	Methodology: Transparency/ Control/ Internal audits
Introducing EbolaCheck: potential for point-of-need infectious disease diagnosis.	/pubmed/26327281	Moschos SA.	Expert Rev Mol Diagn. 2015;15(10):1237-40. doi: 10.1586/14737159.2015.1084228. Epub 2015 Sep 1.	Expert Rev Mol Diagn. 2015	PubMed	citation	PMID:26327281	pubmed	26327281	create date:2015/09/04 | first author:Moschos SA				Not relevant
PSYCHOLOGY. Estimating the reproducibility of psychological science.	/pubmed/26315443	Open Science Collaboration..	Science. 2015 Aug 28;349(6251):aac4716. doi: 10.1126/science.aac4716.	Science. 2015	PubMed	citation	PMID:26315443	pubmed	26315443	create date:2015/09/01 | first author:Open Science Collaboration.				Original research		1	Reproducibility study of psychological studies
A tragedy of the (academic) commons: interpreting the replication crisis in psychology as a social dilemma for early-career researchers.	/pubmed/26300832	Everett JA, Earp BD.	Front Psychol. 2015 Aug 6;6:1152. doi: 10.3389/fpsyg.2015.01152. eCollection 2015. No abstract available.	Front Psychol. 2015	PubMed	citation	PMID:26300832 | PMCID:PMC4527093	pubmed	26300832	create date:2015/08/25 | first author:Everett JA				Opinion		1	Methodology/ Incentives/ Psychology
The sense of identity and symptoms of personality disorders - The results of a non-clinical population study.	/pubmed/26276925	Pilarska A, Suchaãska A.	Psychiatr Pol. 2015 May-Jun;49(3):599-613. doi: 10.12740/PP/21369. English, Polish.	Psychiatr Pol. 2015	PubMed	citation	PMID:26276925	pubmed	26276925	create date:2015/08/16 | first author:Pilarska A				Not relevant
Beyond Power Calculations: Assessing Type S (Sign) and Type M (Magnitude) Errors.	/pubmed/26186114	Gelman A, Carlin J.	Perspect Psychol Sci. 2014 Nov;9(6):641-51. doi: 10.1177/1745691614551642.	Perspect Psychol Sci. 2014	PubMed	citation	PMID:26186114	pubmed	26186114	create date:2015/07/18 | first author:Gelman A				Perspective		1	Methodology/ Psychology: Suggest improved statistical methods
Differences in Establishment of Persistence of Vaccine and Wild Type Rubella Viruses in Fetal Endothelial Cells.	/pubmed/26177032	Perelygina L, Adebayo A, Metcalfe M, Icenogle J.	PLoS One. 2015 Jul 15;10(7):e0133267. doi: 10.1371/journal.pone.0133267. eCollection 2015.	PLoS One. 2015	PubMed	citation	PMID:26177032 | PMCID:PMC4503567	pubmed	26177032	create date:2015/07/16 | first author:Perelygina L				Not relevant
Specific serum IgG at diagnosis of Staphylococcus aureus bloodstream invasion is correlated with disease progression.	/pubmed/26155744	Stentzel S, Sundaramoorthy N, Michalik S, NordengrÌ_n M, Schulz S, Kolata J, Kloppot P, Engelmann S, Steil L, Hecker M, Schmidt F, VÌ¦lker U, Roghmann MC, BrÌ¦ker BM.	J Proteomics. 2015 Oct 14;128:1-7. doi: 10.1016/j.jprot.2015.06.018. Epub 2015 Jul 5.	J Proteomics. 2015	PubMed	citation	PMID:26155744	pubmed	26155744	create date:2015/07/15 | first author:Stentzel S				Not relevant
Know Thy Cells: Improving Biomedical Research Reproducibility.	/pubmed/26136474	Freedman LP.	Sci Transl Med. 2015 Jul 1;7(294):294ed7. doi: 10.1126/scitranslmed.aac7112. No abstract available.	Sci Transl Med. 2015	PubMed	citation	PMID:26136474	pubmed	26136474	create date:2015/07/03 | first author:Freedman LP				Editorial		1	Methodology/ Life sciences: Cell line misauthentication
Genetic profiling reveals an alarming rate of cross-contamination among human cell lines used in China.	/pubmed/26116706	Ye F, Chen C, Qin J, Liu J, Zheng C.	FASEB J. 2015 Oct;29(10):4268-72. doi: 10.1096/fj.14-266718. Epub 2015 Jun 26.	FASEB J. 2015	PubMed	citation	PMID:26116706	pubmed	26116706	create date:2015/06/28 | first author:Ye F				Original research		1	Methodology/ Life sciences: Cell line misauthentication
Rapid phenotypic fingerprinting of cell products by robust measurement of ubiquitous surface markers.	/pubmed/26072709	Baradez MO, Lekishvili T, Marshall D.	Cytometry A. 2015 Jul;87(7):624-35. doi: 10.1002/cyto.a.22637. Epub 2015 Jun 12.	Cytometry A. 2015	PubMed	citation	PMID:26072709	pubmed	26072709	create date:2015/06/16 | first author:Baradez MO				Not relevant
The Economics of Reproducibility in Preclinical Research.	/pubmed/26057340	Freedman LP, Cockburn IM, Simcoe TS.	PLoS Biol. 2015 Jun 9;13(6):e1002165. doi: 10.1371/journal.pbio.1002165. eCollection 2015 Jun.	PLoS Biol. 2015	PubMed	citation	PMID:26057340 | PMCID:PMC4461318	pubmed	26057340	create date:2015/06/10 | first author:Freedman LP				Perspective		1	Methodology/ Preclinical research: Best practice; validation of materials and reagents
Development of a Model System for Tick-Borne Flavivirus Persistence in HEK 293T Cells.	/pubmed/26045539	Mlera L, Offerdahl DK, Martens C, Porcella SF, Melik W, Bloom ME.	MBio. 2015 Jun 4;6(3):e00614. doi: 10.1128/mBio.00614-15.	MBio. 2015	PubMed	citation	PMID:26045539 | PMCID:PMC4462619	pubmed	26045539	create date:2015/06/06 | first author:Mlera L				Not relevant
Replication, falsification, and the crisis of confidence in social psychology.	/pubmed/26042061	Earp BD, Trafimow D.	Front Psychol. 2015 May 19;6:621. doi: 10.3389/fpsyg.2015.00621. eCollection 2015.	Front Psychol. 2015	PubMed	citation	PMID:26042061 | PMCID:PMC4436798	pubmed	26042061	create date:2015/06/05 | first author:Earp BD				Hypothesis/ Theory		1	Methodology/ Psychology: Statistical methods
Reversed-phase ion-pair chromatography-diode array detection of the bispyridinium compound MB327: plasma analysis of a potential novel antidote for the treatment of organophosphorus poisoning.	/pubmed/26041012	John H, Mikler J, Worek F, Thiermann H.	Drug Test Anal. 2016 Feb;8(2):154-63. doi: 10.1002/dta.1821. Epub 2015 Jun 4.	Drug Test Anal. 2016	PubMed	citation	PMID:26041012	pubmed	26041012	create date:2015/06/05 | first author:John H				Not relevant
Reproducibility: changing the policies and culture of cell line authentication.	/pubmed/26020501	Freedman LP, Gibson MC, Ethier SP, Soule HR, Neve RM, Reid YA.	Nat Methods. 2015 Jun;12(6):493-7. doi: 10.1038/nmeth.3403. No abstract available.	Nat Methods. 2015	PubMed	citation	PMID:26020501	pubmed	26020501	create date:2015/05/29 | first author:Freedman LP				Comment		1	Methodology/ Life sciences: Cell line misauthentication
Patient-reported assessment of self-management strategies of health in cancer patients: development and validation of the Smart Management Strategy for Health Assessment Tool (SAT).	/pubmed/26014043	Yun YH, Jung JY, Sim JA, Choi H, Lee JM, Noh DY, Han W, Park KJ, Jeong SY, Park JW, Wu HG, Chie EK, Kim HJ, Lee JH, Zo ZI, Kim S, Lee JE, Nam SJ, Lee ES, Oh JH, Kim YW, Kim YT, et al.	Psychooncology. 2015 Dec;24(12):1723-30. doi: 10.1002/pon.3839. Epub 2015 May 26.	Psychooncology. 2015	PubMed	citation	PMID:26014043	pubmed	26014043	create date:2015/05/28 | first author:Yun YH				Not relevant
Reproducibility crisis: Blame it on the antibodies.	/pubmed/25993940	Baker M.	Nature. 2015 May 21;521(7552):274-6. doi: 10.1038/521274a. No abstract available.	Nature. 2015	PubMed	citation	PMID:25993940	pubmed	25993940	create date:2015/05/23 | first author:Baker M				News		1	Methodology/ Life sciences: Antibodies
The use of pseudotypes to study viruses, virus sero-epidemiology and vaccination.	/pubmed/25936665	Bentley EM, Mather ST, Temperton NJ.	Vaccine. 2015 Jun 12;33(26):2955-62. doi: 10.1016/j.vaccine.2015.04.071. Epub 2015 Apr 30.	Vaccine. 2015	PubMed	citation	PMID:25936665	pubmed	25936665	create date:2015/05/06 | first author:Bentley EM				Not relevant
Alpha-Linolenic Acid-Induced Increase in Neurogenesis is a Key Factor in the Improvement in the Passive Avoidance Task After Soman Exposure.	/pubmed/25920465	Piermartiri TC, Pan H, Chen J, McDonough J, Grunberg N, Apland JP, Marini AM.	Neuromolecular Med. 2015 Sep;17(3):251-69. doi: 10.1007/s12017-015-8353-y. Epub 2015 Apr 29.	Neuromolecular Med. 2015	PubMed	citation	PMID:25920465	pubmed	25920465	create date:2015/04/30 | first author:Piermartiri TC				Not relevant
An RNA editing fingerprint of cancer stem cell reprogramming.	/pubmed/25889244	Crews LA, Jiang Q, Zipeto MA, Lazzari E, Court AC, Ali S, Barrett CL, Frazer KA, Jamieson CH.	J Transl Med. 2015 Feb 12;13:52. doi: 10.1186/s12967-014-0370-3.	J Transl Med. 2015	PubMed	citation	PMID:25889244 | PMCID:PMC4341880	pubmed	25889244	create date:2015/04/19 | first author:Crews LA				Not relevant
Inflammation and congenital heart disease associated pulmonary hypertension.	/pubmed/25881225	Gursoy M, Salihoglu E, Hatemi AC, Hokenek AF, Ozkan S, Ceyran H.	Heart Surg Forum. 2015 Feb 27;18(1):E38-41. doi: 10.1532/hsf.1228.	Heart Surg Forum. 2015	PubMed	citation	PMID:25881225	pubmed	25881225	create date:2015/04/17 | first author:Gursoy M				Not relevant
A resource for cell line authentication, annotation and quality control.	/pubmed/25877200	Yu M, Selvaraj SK, Liang-Chu MM, Aghajani S, Busse M, Yuan J, Lee G, Peale F, Klijn C, Bourgon R, Kaminker JS, Neve RM.	Nature. 2015 Apr 16;520(7547):307-11. doi: 10.1038/nature14397.	Nature. 2015	PubMed	citation	PMID:25877200	pubmed	25877200	create date:2015/04/17 | first author:Yu M				Original research		1	Methodology/ Life sciences: Database for cell line authentication
Change of practice patterns in urology with the introduction of the Da Vinci surgical system: the Greek NHS experience in debt crisis era.	/pubmed/25847898	Deligiannis D, Anastasiou I, Mygdalis V, Fragkiadis E, Stravodimos K.	Arch Ital Urol Androl. 2015 Mar 31;87(1):56-61. doi: 10.4081/aiua.2015.1.56.	Arch Ital Urol Androl. 2015	PubMed	citation	PMID:25847898	pubmed	25847898	create date:2015/04/08 | first author:Deligiannis D				Not relevant
Resilience in a reborn nation: Validation of the Lithuanian Resilience Scale for Adults (RSA).	/pubmed/25796289	Hilbig J, ViliÇnien€Ñ R, Friborg O, PakalniÁkien€Ñ V, Danilevi€iÇt€Ñ V.	Compr Psychiatry. 2015 Jul;60:126-33. doi: 10.1016/j.comppsych.2015.02.003. Epub 2015 Feb 17.	Compr Psychiatry. 2015	PubMed	citation	PMID:25796289	pubmed	25796289	create date:2015/03/23 | first author:Hilbig J				Not relevant
A reminder on millisecond timing accuracy and potential replication failure in computer-based psychology experiments: An open letter.	/pubmed/25761394	Plant RR.	Behav Res Methods. 2016 Mar;48(1):408-11. doi: 10.3758/s13428-015-0577-0.	Behav Res Methods. 2016	PubMed	citation	PMID:25761394	pubmed	25761394	create date:2015/03/13 | first author:Plant RR				Viewpoint/ methodology		1	Psychology: Methodology, millisecond timing error
Development of the Emergency Medical Services Role Identity Scale (EMS-RIS).	/pubmed/25760489	Donnelly EA, Siebert D, Siebert C.	Soc Work Health Care. 2015;54(3):212-33. doi: 10.1080/00981389.2014.999979.	Soc Work Health Care. 2015	PubMed	citation	PMID:25760489	pubmed	25760489	create date:2015/03/12 | first author:Donnelly EA				Not relevant
Screening for psychological difficulties in young children in crisis: complementary cross-cultural validation.	/pubmed/25740941	Marquer C, Barry C, Mouchenik Y, Djibo DM, Manzo ML, Trujillo Maza EM, Githaiga S, Casas G, Kirubi BW, Marichez H, Falissard B, Moro MR, Grais RF.	Int Health. 2015 Nov;7(6):438-46. doi: 10.1093/inthealth/ihv006. Epub 2015 Mar 4.	Int Health. 2015	PubMed	citation	PMID:25740941	pubmed	25740941	create date:2015/03/06 | first author:Marquer C				Not relevant
Human biosample authentication using the high-throughput, cost-effective SNPtrace(TM) system.	/pubmed/25714623	Liang-Chu MM, Yu M, Haverty PM, Koeman J, Ziegle J, Lee M, Bourgon R, Neve RM.	PLoS One. 2015 Feb 25;10(2):e0116218. doi: 10.1371/journal.pone.0116218. eCollection 2015.	PLoS One. 2015	PubMed	citation	PMID:25714623 | PMCID:PMC4340925	pubmed	25714623	create date:2015/02/26 | first author:Liang-Chu MM				Not relevant
Objective structured assessment of nontechnical skills: Reliability of a global rating scale for the in-training assessment in the operating room.	/pubmed/25704419	Dedy NJ, Szasz P, Louridas M, Bonrath EM, Husslein H, Grantcharov TP.	Surgery. 2015 Jun;157(6):1002-13. doi: 10.1016/j.surg.2014.12.023. Epub 2015 Feb 20.	Surgery. 2015	PubMed	citation	PMID:25704419	pubmed	25704419	create date:2015/02/24 | first author:Dedy NJ				Not relevant
The changing face of hemostasis testing in modern laboratories: consolidation, automation, and beyond.	/pubmed/25703516	Lippi G, Plebani M, Favaloro EJ.	Semin Thromb Hemost. 2015 Apr;41(3):294-9. doi: 10.1055/s-0035-1544196. Epub 2015 Feb 19.	Semin Thromb Hemost. 2015	PubMed	citation	PMID:25703516	pubmed	25703516	create date:2015/02/24 | first author:Lippi G				Not relevant
Simulation as a high stakes assessment tool in emergency medicine.	/pubmed/25690440	O'Leary F.	Emerg Med Australas. 2015 Apr;27(2):173-5. doi: 10.1111/1742-6723.12370. Epub 2015 Feb 17.	Emerg Med Australas. 2015	PubMed	citation	PMID:25690440 | PMCID:PMC4415593	pubmed	25690440	create date:2015/02/19 | first author:O'Leary F				Not relevant
A simple flow cytometry-based barcode for routine authentication of multiple myeloma and mantle cell lymphoma cell lines.	/pubmed/25688540	MaÃ¯ga S, Brosseau C, Descamps G, Dousset C, Gomez-Bougie P, Chiron D, MÃ©noret E, Kervoelen C, ViÃ© H, Cesbron A, Moreau-Aubry A, Amiot M, Pellat-Deceunynck C.	Cytometry A. 2015 Apr;87(4):285-8. doi: 10.1002/cyto.a.22643. Epub 2015 Feb 16. No abstract available.	Cytometry A. 2015	PubMed	citation	PMID:25688540	pubmed	25688540	create date:2015/02/18 | first author:MaÃ¯ga S				Not relevant
A purely confirmatory replication study of structural brain-behavior correlations.	/pubmed/25684445	Boekel W, Wagenmakers EJ, Belay L, Verhagen J, Brown S, Forstmann BU.	Cortex. 2015 May;66:115-33. doi: 10.1016/j.cortex.2014.11.019. Epub 2015 Jan 14.	Cortex. 2015	PubMed	citation	PMID:25684445	pubmed	25684445	create date:2015/02/17 | first author:Boekel W				Original research		1	Psychology: Lack of successful replication of five studies
Murine gammaherpesvirus (MHV-68) transforms cultured cells in vitro.	/pubmed/25677084	MrÌÁzovÌÁ V, BetÌÁkovÌÁ T, KÌ¼delovÌÁ M, ÊupolÌ_kovÌÁ M, LachovÌÁ V, LapunÌ_kovÌÁ B, Golais F.	Intervirology. 2015;58(2):69-72. doi: 10.1159/000370071. Epub 2015 Feb 13.	Intervirology. 2015	PubMed	citation	PMID:25677084	pubmed	25677084	create date:2015/02/14 | first author:MrÌÁzovÌÁ V				Not relevant
Human papillomavirus carcinogenesis: an identity crisis in the retinoblastoma tumor suppressor pathway.	/pubmed/25673729	Munger K, Jones DL.	J Virol. 2015 May;89(9):4708-11. doi: 10.1128/JVI.03486-14. Epub 2015 Feb 11. Review.	J Virol. 2015	PubMed	citation	PMID:25673729 | PMCID:PMC4403492	pubmed	25673729	create date:2015/02/13 | first author:Munger K				Not relevant
The impact of preclinical irreproducibility on drug development.	/pubmed/25670378	Freedman LP, Gibson MC.	Clin Pharmacol Ther. 2015 Jan;97(1):16-8. doi: 10.1002/cpt.9. Epub 2014 Dec 2.	Clin Pharmacol Ther. 2015	PubMed	citation	PMID:25670378	pubmed	25670378	create date:2015/02/12 | first author:Freedman LP				Perspective		1	Methodology/ Preclinical research: Better practice
[truncated: 560 more rows]

## Sheet: 6) Relevant
Title	URL	Description	Details	ShortDetails	Resource	Type	Identifiers	Db	EntrezUID	Properties				Comment		Relevant	Original data on topic	Attitude
[truncated: 281 more rows]

[truncated: 8 more sheets: 7) Article types, 8) Analysis, 9) Original data, 10) Original data article types, Suppl Table 2 Overview, 1) Total, 2) Relevant, 3) Additional articles]
